# Supplementary material for: Metalloradical activation of α-formyldiazoacetates for the catalytic asymmetric radical cyclopropanation of alkenes
Source: PubMed Central journal article supplement (PMC5605771; doi:10.1039/c7sc00658f), 2017-03-31
Supplement: SC-008-C7SC00658F-s001.pdf [file SC-008-C7SC00658F-s001.pdf]

## Supporting Information

### Metalloradical Activation of $\alpha$ -Formyldiazoacetates for Catalytic Asymmetric Radical Cyclopropanation of Alkenes

Xue Xu,<sup>†</sup> Yong Wang,<sup>§</sup> Xin Cui,<sup>†</sup> Lukasz Wojtas,<sup>†</sup> and X. Peter Zhang<sup>\*§†</sup>

<sup>§</sup> Department of Chemistry, Merkert Chemistry Center, Boston College, Chestnut Hill, Massachusetts 02467, United States

<sup>†</sup> Department of Chemistry, University of South Florida, Tampa, Florida 33620, United States

## Table of Contents

|                                                                             |     |
|-----------------------------------------------------------------------------|-----|
| I. General Considerations-----                                              | S2  |
| II. General Procedure for $\alpha$ -Formyldiazoacetates Synthesis-----      | S2  |
| III. General Procedure for the Reduction of Cyclopropane Carbaldehydes----- | S3  |
| IV. General Procedure for Asymmetric Cyclopropanation-----                  | S3  |
| V. Further Transformations of Chiral 1,1-Cyclopropaneformylesters-----      | S10 |
| VI. X-ray Crystallography-----                                              | S13 |
| VII. References-----                                                        | S15 |
| X. Spectra-----                                                             | S16 |

**I. General Considerations.** All cyclopropanation reactions were carried out under a nitrogen atmosphere in oven-dried glassware following standard Schlenk techniques. Toluene was distilled under nitrogen from sodium benzophenone ketyl. Thin layer chromatography was performed on Merck TLC plates (silica gel 60 F254). Flash column chromatography was performed with ICN silica gel (60 Å, 230-400 mesh, 32-63 μm). Proton and carbon nuclear magnetic resonance spectra (<sup>1</sup>H NMR and <sup>13</sup>C NMR) were recorded on a Bruker 250 (250 MHz) or Varian Inova 400 (400 MHz) or Unity Inova 600 (600 MHz) instrument with chemical shifts reported relative to residual solvent. HPLC measurements were carried out on a Shimadzu HPLC system with Whelk-O1, Chiralcel OD-H, OJ-H, and AD-H columns. GC measurements were carried out on a Shimadzu GCMS system with Chiral GTA and Dex-CB column. HRMS data was obtained on an Agilent 1100 LC/MS ESI/TOF mass spectrometer with electrospray ionization.

**II. General Procedure for α-Formyldiazoacetates Synthesis:<sup>1</sup>**

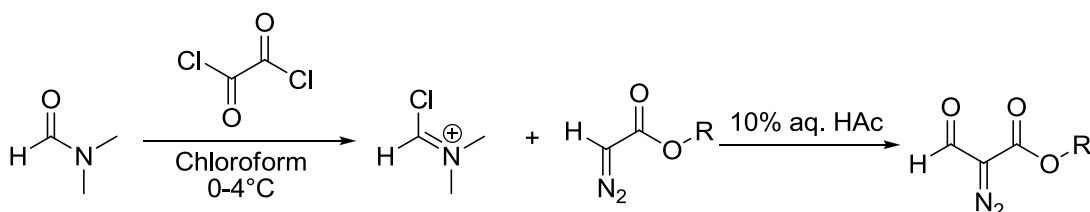

*(Diazo reagents are a class of potentially explosive compounds. Protections must be applied for the operation. Handling of diazo compounds must be done within a fume hood with a safety shield around the reaction. All the diazo reagents used in this work were stored in a freezer at -20 °C)*

In a dried three-necked flask is placed a CHCl<sub>3</sub> solution of DMF (1.1 g, 15 mmol/30 ml). While stirring in a freezing mixture, 2.2 g of oxalyl chloride (18 mmol) was added dropwise. After the vigorous evolution of CO and CO<sub>2</sub> has ceased, the mixture was heated to 40 °C for 10 min. The mixture was then cooled to -10 °C and diazoacetate (30 mmol) was added dropwise, maintaining the temperature no higher than 0 °C. After the brisk evolution of N<sub>2</sub> has subsided, the mixture was stirred at r.t. for 1 h. The solution was concentrated, and 100 ml of cold dry Et<sub>2</sub>O were added. The formed crystals were filtered immediately, washed successively with dry Et<sub>2</sub>O and then dissolved in 10% aq. AcOH. After stirring for 2 h, the mixture was extracted with Et<sub>2</sub>O, washed with brine,

dried with Na<sub>2</sub>SO<sub>4</sub>, filtered, and concentrated, followed by flash silica gel chromatography (pentane/diethyl ether) to afford desired product with around 20% overall yield.

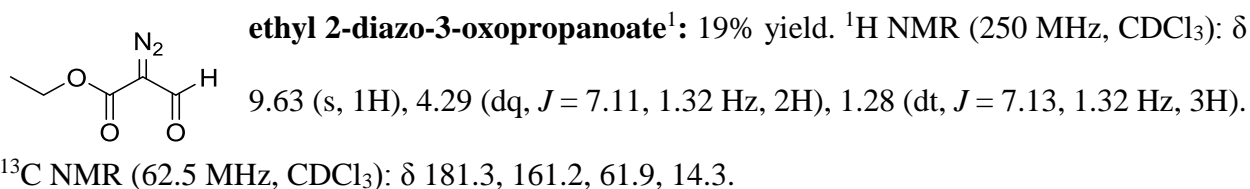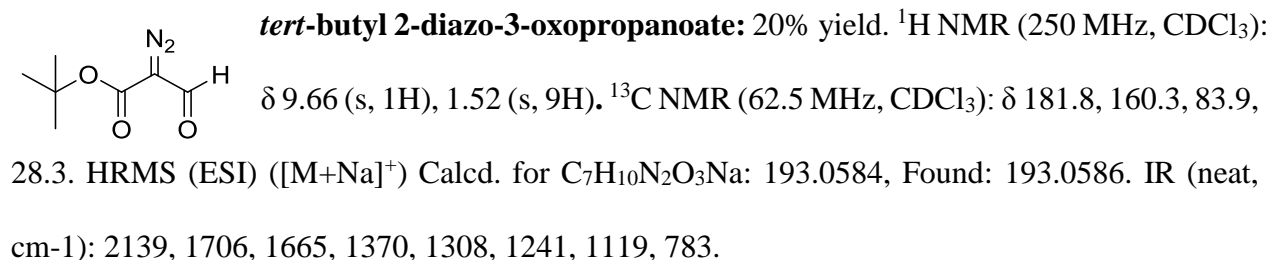

### III. General Procedure for the Reduction of Cyclopropane Carbaldehydes (*In some cases, a further reduction step is needed for the determination of ee*)

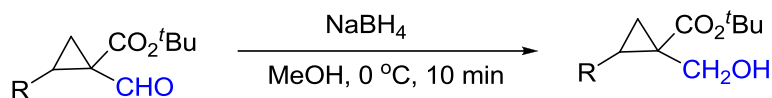

To a stirred at 0 °C solution of cyclopropyl aldehydes (0.1 mmol) in methanol (5 ml) was added dropwise a solution of sodium borohydride (1.2-1.5 equiv.) in methanol (1 ml). The mixture was stirred for 10 min at 0 °C, and then quenched by 3N aqueous NaOH (3 ml), the mixture was then extracted by ethyl acetate (3 x 5 ml), and the combined organic phases were washed with brine, dried with Na<sub>2</sub>SO<sub>4</sub>, filtered, and concentrated. Purification of the crude residue by flash silica gel chromatography afforded the corresponding alcohol.

**IV. General Procedure for Asymmetric Cyclopropanation:** [Co(**P2**)] (5 mol %) was placed in an oven-dried, resealable Schlenk tube. The tube was capped with a Teflon screwcap, evacuated, and backfilled with nitrogen. The screwcap was replaced with a rubber septum. 1.0 Equivalent of

alkene (0.10 mmol), 1.2 equivalents of diazo compound (0.12 mmol) in 0.5 ml toluene was added once via syringe. Schlenk tube was capped by teflon screwcap instead of rubber septum and stirred at room temperature. Following completion of the reaction, the reaction mixture was purified by flash chromatography. The fractions containing product were collected and concentrated by rotary evaporation to afford the compound. In most cases, the product was visualized on TLC using the cerium ammonium molybdate (CAM) stain.

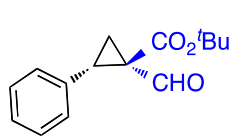

**tert-butyl 1-formyl-2-phenylcyclopropanecarboxylate (1a):**  $[\alpha]_D^{20} = -79.04$  ( $c = 1.01$ ,  $\text{CHCl}_3$ ).  $^1\text{H NMR}$  (250 MHz,  $\text{CDCl}_3$ ):  $\delta$  9.85 (s, 1H), 7.25-7.08 (m, 5H), 3.29 (t,  $J = 8.91$  Hz, 1H), 2.26 (dd,  $J = 8.70, 4.35$  Hz, 1H), 1.90 (dd,  $J = 9.11, 4.34$  Hz, 1H), 1.48 (s, 9H).  $^{13}\text{C NMR}$  (62.5 MHz,  $\text{CDCl}_3$ ):  $\delta$  195.4, 169.6, 133.1, 129.7, 128.1, 127.7, 82.5, 42.0, 41.3, 28.2, 19.9. IR (neat,  $\text{cm}^{-1}$ ): 1704, 1369, 1293, 1259, 1144, 763, 697. HRMS (ESI) ( $[\text{M}+\text{H}]^+$ ) Calcd. for  $\text{C}_{15}\text{H}_{19}\text{O}_3$ : 247.1329, Found: 247.1330. HPLC analysis:  $ee = 96\%$ . OJ-H (97% hexanes: 3% isopropanol, 0.8 ml/min)  $t_{\text{major}} = 20.43$  min,  $t_{\text{minor}} = 16.50$  min.

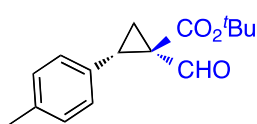

**tert-butyl 1-formyl-2-p-tolylcyclopropanecarboxylate (1b):**  $[\alpha]_D^{20} = -80.60$  ( $c = 0.34$ ,  $\text{CHCl}_3$ ).  $^1\text{H NMR}$  (400 MHz,  $\text{CDCl}_3$ ):  $\delta$  9.84 (s, 1H), 7.09 (m, 4H), 3.26 (t,  $J = 8.90$  Hz, 1H), 1.88 (dd,  $J = 9.09, 4.30$  Hz, 1H), 2.26-2.20 (m, 4H), 1.48 (s, 9H).  $^{13}\text{C NMR}$  (62.5 MHz,  $\text{CDCl}_3$ ):  $\delta$  195.5, 169.7, 137.4, 130.0, 129.5, 128.8, 82.5, 42.2, 41.4, 28.4, 28.2, 21.2, 19.9. IR (neat,  $\text{cm}^{-1}$ ): 1702, 1369, 1275, 1154, 1127, 1098, 763, 700. HRMS (ESI) ( $[\text{M}+\text{Na}]^+$ ) Calcd. for  $\text{C}_{16}\text{H}_{20}\text{O}_3\text{Na}$ : 283.1305, Found: 283.1306.

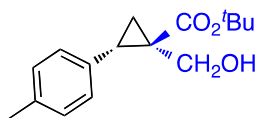

**tert-butyl 1-(hydroxymethyl)-2-p-tolylcyclopropanecarboxylate (1ba):**  $^1\text{H NMR}$  (250 MHz,  $\text{CDCl}_3$ ):  $\delta$  7.05 (m, 4H), 3.40 (ddd,  $J = 12.33, 2.91, 0.92$  Hz, 1H), 3.26 (dd,  $J = 12.32, 5.27$  Hz, 1H), 2.82 (br, 1H), 2.25 (s, 3H), 1.51 (dd,  $J = 8.69, 4.58$  Hz, 1H), 1.44 (s, 9H), 1.28 (dd,  $J = 7.14, 4.75$  Hz, 1H).  $^{13}\text{C NMR}$  (62.5 MHz,  $\text{CDCl}_3$ ):  $\delta$  173.8, 136.6, 132.9, 129.0, 129.0, 81.4, 62.3, 32.3, 30.5, 28.2, 21.1, 17.4. HRMS (ESI) ( $[\text{M}+\text{Na}]^+$ ) Calcd. for  $\text{C}_{16}\text{H}_{22}\text{O}_3\text{Na}$ : 285.1461, Found: 285.1457. HPLC analysis:  $ee = 97\%$ . Whelk (99% hexanes: 1% isopropanol, 0.8 ml/min)  $t_{\text{major}} = 24.24$  min,  $t_{\text{minor}} = 28.18$  min.

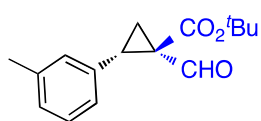

**tert-butyl 1-formyl-2-m-tolylcyclopropanecarboxylate (1c):**  $[\alpha]^{20}_{\text{D}} = -90.03$  ( $c = 0.12$ ,  $\text{CHCl}_3$ ).  $^1\text{H NMR}$  (250 MHz,  $\text{CDCl}_3$ ):  $\delta$  9.84 (s, 1H), 7.15-6.86 (m, 4H), 1.88 (dd,  $J = 9.09, 4.36$  Hz, 1H), 2.25 (dd,  $J = 14.24, 5.67$  Hz, 1H), 2.25 (s, 3H) 3.26 (t,  $J = 8.93$  Hz, 1H), 1.48 (s, 9H).  $^{13}\text{C NMR}$  (62.5 MHz,  $\text{CDCl}_3$ ):  $\delta$  195.5, 169.7, 137.7, 133.0, 130.4, 128.4, 128.0, 126.6, 82.5, 42.0, 41.3, 28.2, 21.4, 19.8. IR (neat,  $\text{cm}^{-1}$ ): 1702, 1369, 1275, 1127, 1098, 763. HRMS (ESI) ( $[\text{M}+\text{H}]^+$ ) Calcd. for  $\text{C}_{16}\text{H}_{21}\text{O}_3$ : 261.1485, Found: 261.1480.

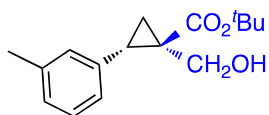

**tert-butyl 1-(hydroxymethyl)-2-m-tolylcyclopropanecarboxylate (1ca):**  $^1\text{H NMR}$  (250 MHz,  $\text{CDCl}_3$ ):  $\delta$  7.17-6.91 (m, 4H), 3.46 (d,  $J = 12.32$  Hz, 1H), 3.29-3.13 (m, 1H), 2.83 (t,  $J = 8.33$  Hz, 1H), 2.45-2.33 (m, 1H), 2.26 (s, 3H), 1.56-1.50 (m, 1H), 1.31 (dd,  $J = 7.18, 4.78$  Hz, 1H), 1.44 (s, 9H).  $^{13}\text{C NMR}$  (62.5 MHz,  $\text{CDCl}_3$ ):  $\delta$  173.7, 137.9, 135.9, 129.9, 128.2, 127.8, 126.1, 81.5, 62.3, 32.3, 30.7, 28.1, 21.4, 17.4. HRMS (ESI) ( $[\text{M}+\text{Na}]^+$ ) Calcd. for  $\text{C}_{16}\text{H}_{23}\text{O}_3$ : 285.1461, Found: 285.1461. HPLC analysis:  $ee = 99\%$ . AD-H (99% hexanes: 1% isopropanol, 0.8 ml/min)  $t_{\text{major}} = 33.50$  min,  $t_{\text{minor}} = 21.76$  min.

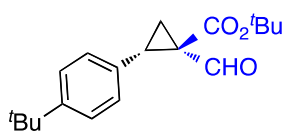

**tert-butyl 2-(4-tert-butylphenyl)-1-formylcyclopropanecarboxylate (1d):**  $[\alpha]^{20}_{\text{D}} = -117.53$  ( $c = 0.98$ ,  $\text{CHCl}_3$ ).  $^1\text{H NMR}$  (250 MHz,  $\text{CDCl}_3$ ):  $\delta$  9.84 (s, 1H), 7.26-7.19 (m, 2H), 7.07 (d,  $J = 8.24$  Hz, 2H), 3.25 (t,  $J = 8.97$  Hz, 1H), 2.25 (dd,  $J = 8.74, 4.36$  Hz, 1H), 1.89 (dd,  $J = 9.10, 4.32$  Hz, 1H), 1.48 (s, 9H), 1.23 (s, 9H).  $^{13}\text{C NMR}$  (62.5 MHz,  $\text{CDCl}_3$ ):  $\delta$  195.5, 169.7, 150.6, 130.0, 129.3, 125.067, 82.5, 42.3, 41.3, 34.5, 31.3, 28.2, 19.8. IR (neat,  $\text{cm}^{-1}$ ): 1721, 1369, 1294, 1259, 1146, 1098, 841, 753. HRMS (ESI) ( $[\text{M}+\text{Na}]^+$ ) Calcd. for  $\text{C}_{19}\text{H}_{26}\text{O}_3\text{Na}$ : 325.1774, Found: 325.1773. HPLC analysis:  $ee = 97\%$ . Whelk (99% hexanes: 1% isopropanol, 0.8 ml/min)  $t_{\text{major}} = 11.56$  min,  $t_{\text{minor}} = 33.36$  min.

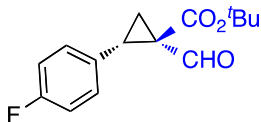

**tert-butyl 2-(4-fluorophenyl)-1-formylcyclopropanecarboxylate (1e):**  $[\alpha]^{20}_{\text{D}} = -193.32$  ( $c = 0.67$ ,  $\text{CHCl}_3$ ).  $^1\text{H NMR}$  (250 MHz,  $\text{CDCl}_3$ ):  $\delta$  9.87 (s, 1H), 7.08-7.14 (m, 2H), 6.95-6.84 (m, 2H), 3.26 (t,  $J = 8.91$  Hz, 1H), 2.21 (dd,  $J = 8.68, 4.38$  Hz, 1H), 1.91 (dd,  $J = 9.13, 4.34$  Hz, 1H), 1.48 (s, 9H).  $^{13}\text{C NMR}$  (62.5 MHz,  $\text{CDCl}_3$ ):  $\delta$  195.5, 169.5, 164.1, 160.2, 131.3, 131.2, 128.8, 128.8, 115.2, 114.9, 82.7, 42.0, 40.6, 28.2, 20.3. IR (neat,  $\text{cm}^{-1}$ ): 1702, 1514, 1369, 1295, 1146, 1109, 841, 756. HRMS (ESI) ( $[\text{M}+\text{Na}]^+$ ) Calcd. for  $\text{C}_{15}\text{H}_{11}\text{FO}_3\text{Na}$ : 287.1054, Found: 287.1055.

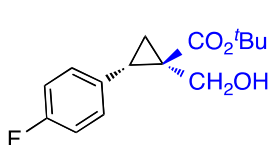

**tert-butyl**

**2-(4-fluorophenyl)-1-(hydroxymethyl)**

**cyclopropanecarboxylate (1ea):**  $^1\text{H NMR}$  (250 MHz,  $\text{CDCl}_3$ ):  $\delta$  7.16 (dd,  $J = 8.55, 5.76$  Hz, 2H), 6.92 (t,  $J = 8.68$  Hz, 2H), 3.31 (s, 2H), 2.81 (m, 1H), 2.57-2.40 (br, 1H), 1.53 (dd,  $J = 8.97, 4.79$  Hz, 1H), 1.44 (s, 9H), 1.21 (m, 1H).  $^{13}\text{C NMR}$  (62.5 MHz,  $\text{CDCl}_3$ ):  $\delta$  173.6, 163.8, 159.9, 131.8, 130.9, 130.8, 129.2, 128.3, 115.4, 115.0, 81.7, 62.2, 32.2, 30.1, 28.1, 17.6. HRMS (ESI) ( $[\text{M}+\text{Na}]^+$ ) Calcd. for  $\text{C}_{15}\text{H}_{19}\text{FO}_3\text{Na}$ : 289.1210, Found: 289.1211. HPLC analysis:  $ee = 97\%$ . AD-H (99% hexanes: 1% isopropanol, 0.8 ml/min)  $t_{\text{major}} = 25.90$  min,  $t_{\text{minor}} = 23.42$  min.

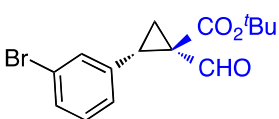

**tert-butyl 2-(3-bromophenyl)-1-formylcyclopropanecarboxylate (1f):**

$[\alpha]_{\text{D}}^{20} = -67.81$  ( $c = 1.00$ ,  $\text{CHCl}_3$ ).  $^1\text{H NMR}$  (250 MHz,  $\text{CDCl}_3$ ):  $\delta$  9.87 (s, 1H), 7.29 (m, 2H), 7.07 (m, 2H), 3.23 (t,  $J = 8.85$  Hz, 1H), 2.20 (dd,  $J = 8.60, 4.38$  Hz, 1H), 1.89 (dd,  $J = 9.13, 4.37$  Hz, 1H), 1.49 (s, 9H).  $^{13}\text{C NMR}$  (62.5 MHz,  $\text{CDCl}_3$ ):  $\delta$  195.2, 169.3, 135.5, 132.8, 130.8, 129.6, 128.2, 122.2, 82.8, 41.8, 40.1, 28.2, 20.1. IR (neat,  $\text{cm}^{-1}$ ): 1702, 1370, 1326, 1296, 1146, 846, 752. HRMS (ESI) ( $[\text{M}+\text{H}]^+$ ) Calcd. for  $\text{C}_{15}\text{H}_{18}\text{BrO}_3$ : 325.0434, Found: 325.0442. HPLC analysis:  $ee = 99\%$ . Whelk (98% hexanes: 2% isopropanol, 0.8 ml/min)  $t_{\text{major}} = 12.65$  min,  $t_{\text{minor}} = 27.37$  min.

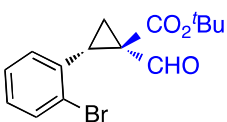

**tert-butyl 2-(2-bromophenyl)-1-formylcyclopropanecarboxylate (1g):**

$[\alpha]_{\text{D}}^{20} = 26.94$  ( $c = 0.88$ ,  $\text{CHCl}_3$ ).  $^1\text{H NMR}$  (250 MHz,  $\text{CDCl}_3$ ):  $\delta$  10.01 (s, 1H), 7.43 (d,  $J = 7.87$  Hz, 1H), 7.21 (m, 2H), 7.11-7.02 (m, 1H), 3.12 (t,  $J = 8.79$  Hz, 1H), 2.20 (dd,  $J = 8.71, 4.20$  Hz, 1H), 1.97 (dd,  $J = 8.89, 4.24$  Hz, 1H), 1.50 (s, 9H).  $^{13}\text{C NMR}$  (62.5 MHz,  $\text{CDCl}_3$ ):  $\delta$  194.9, 169.5, 134.0, 132.1, 131.4, 129.3, 127.1, 126.5, 82.5, 42.2, 40.7, 28.2, 20.9. IR (neat,  $\text{cm}^{-1}$ ): 1702, 1368, 1315, 1297, 1146, 845, 759. HRMS (ESI) ( $[\text{M}+\text{Na}]^+$ ) Calcd. for  $\text{C}_{15}\text{H}_{17}\text{BrO}_3\text{Na}$ : 347.0253, Found: 347.0252. HPLC analysis:  $ee = 98\%$ . Whelk (99% hexanes: 1% isopropanol, 0.8 ml/min)  $t_{\text{major}} = 15.50$  min,  $t_{\text{minor}} = 57.33$  min.

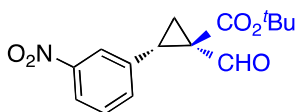

**tert-butyl 1-formyl-2-(3-nitrophenyl)cyclopropanecarboxylate (1h):**

$[\alpha]_{\text{D}}^{20} = -73.59$  ( $c = 1.04$ ,  $\text{CHCl}_3$ ).  $^1\text{H NMR}$  (250 MHz,  $\text{CDCl}_3$ ):  $\delta$  9.93 (s, 1H), 8.08-7.98 (m, 2H), 7.54-7.32 (m, 2H), 3.35 (t,  $J = 8.89$  Hz, 1H), 2.27 (dd,  $J = 8.61, 4.45$  Hz, 1H), 2.00 (dd,  $J = 9.13, 4.43$  Hz, 1H), 1.51 (s, 9H).  $^{13}\text{C NMR}$  (62.5 MHz,  $\text{CDCl}_3$ ):  $\delta$  194.3, 167.9, 146.9, 134.6, 127.9, 123.8, 121.6, 82.1, 40.5, 38.5, 27.1, 19.8. IR

(neat,  $\text{cm}^{-1}$ ): 1702, 1530, 1349, 1296, 1146, 752. HRMS (ESI) ( $[\text{M}+\text{H}]^+$ ) Calcd. for  $\text{C}_{15}\text{H}_{18}\text{NO}_5$ : 292.1179, Found: 292.1180. HPLC analysis:  $ee = 97\%$ . Welk (98% hexanes: 2% isopropanol, 0.8 ml/min)  $t_{\text{major}} = 29.74$  min,  $t_{\text{minor}} = 50.48$  min.

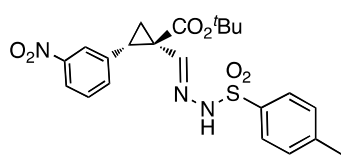

**(1R,2S)-tert-butyl**

**2-(3-nitrophenyl)-1-((E)-(2-**

**tosylhydrazono)methyl)cyclopropanecarboxylate (1ha):**  $[\alpha]_{\text{D}}^{20} = -$

29.08 ( $c = 1.01$ ,  $\text{CHCl}_3$ ).  $^1\text{H}$  NMR (400 MHz,  $\text{CDCl}_3$ ):  $\delta$  7.97-7.92 (m, 2H), 7.68 (d,  $J = 8.31$  Hz, 2H), 7.57 (s, 1H), 7.29 (d,  $J = 8.42$  Hz, 2H), 7.26 (d,  $J = 8.02$  Hz, 2H), 7.16 (m, 1H), 3.09 (t,  $J = 8.57$  Hz, 1H), 2.46 (s, 3H), 2.19-2.13 (m, 1H), 1.91 (dd,  $J = 9.19$ , 5.11 Hz, 1H), 1.46 (s, 9H).  $^{13}\text{C}$  NMR (100 MHz,  $\text{CDCl}_3$ ):  $\delta$  169.8, 147.8, 144.3, 144.3, 136.2, 135.1, 134.7, 129.6, 128.8, 127.9, 124.9, 122.0, 82.6, 38.1, 36.4, 28.0, 21.6, 17.6. IR (neat,  $\text{cm}^{-1}$ ): 3232, 2926, 1716, 1530, 1348, 1284, 1148. HRMS (ESI) ( $[\text{M}+\text{Na}]^+$ ) Calcd. for  $\text{C}_{22}\text{H}_{25}\text{N}_3\text{O}_6\text{SNa}$ : 482.1356, Found: 482.1381. HPLC analysis:  $ee = 96\%$ . Welk (90% hexanes: 10% isopropanol, 1.0 ml/min)  $t_{\text{major}} = 31.48$  min,  $t_{\text{minor}} = 27.42$  min.

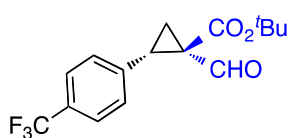

**tert-butyl**

**1-formyl-2-(4-(trifluoromethyl)phenyl)**

**cyclopropanecarboxylate (1i):**  $[\alpha]_{\text{D}}^{20} = -96.62$  ( $c = 1.02$ ,  $\text{CHCl}_3$ ).  $^1\text{H}$

NMR (250 MHz,  $\text{CDCl}_3$ ):  $\delta$  9.88 (s, 1H), 7.46 (d,  $J = 8.10$  Hz, 2H), 7.25 (d,  $J = 8.31$  Hz, 2H), 3.30 (t,  $J = 8.88$  Hz, 1H), 2.25 (dd,  $J = 8.65$ , 4.42 Hz, 1H), 1.94 (dd,  $J = 9.06$ , 4.34 Hz, 1H), 1.49 (s, 9H).  $^{13}\text{C}$  NMR (62.5 MHz,  $\text{CDCl}_3$ ):  $\delta$  195.2, 169.2, 137.2, 130.5, 130.0, 129.4, 128.9, 126.2, 125.8, 125.1, 125.0, 125.0, 124.9, 121.8, 82.9, 41.9, 40.1, 28.1, 27.6, 20.2. IR (neat,  $\text{cm}^{-1}$ ): 1720, 1698, 1327, 1296, 1140, 1119, 1068, 850. HRMS (ESI) ( $[\text{M}+\text{H}]^+$ ) Calcd. for  $\text{C}_{17}\text{H}_{18}\text{F}_3\text{O}_3$ : 315.1203, Found: 315.1210.

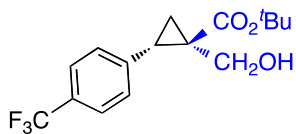

**tert-butyl**

**1-(hydroxymethyl)-2-(4-(trifluoromethyl)phenyl)**

**cyclopropanecarboxylate (1ia):**  $^1\text{H}$  NMR (600 MHz,  $\text{CDCl}_3$ ):  $\delta$  7.53

(d,  $J = 8.18$  Hz, 2H), 7.37 (d,  $J = 8.06$  Hz, 2H), 3.41 (d,  $J = 12.47$  Hz, 1H), 3.33 (d,  $J = 12.39$  Hz, 1H), 2.93 (t,  $J = 8.00$  Hz, 1H), 2.52 (s, 1H), 1.63 (dd,  $J = 8.91$ , 4.92 Hz, 1H), 1.50 (s, 9H), 1.34 (dd,  $J = 7.13$ , 4.94 Hz, 1H).  $^{13}\text{C}$  NMR (62.5 MHz,  $\text{CDCl}_3$ ):  $\delta$  172.2, 139.3, 128.6, 128.4, 127.9, 125.2, 124.3, 124.2, 124.1, 124.1, 120.9, 80.9, 60.9, 31.5, 29.3, 27.1, 16.3. HRMS (ESI) ( $[\text{M}+\text{Na}]^+$ ) Calcd. for  $\text{C}_{16}\text{H}_{19}\text{F}_3\text{O}_3\text{Na}$ : 339.1179, Found: 339.1172. HPLC



analysis: *ee* = 96%. AD-H (99% hexanes: 1% isopropanol, 0.8 ml/min)  $t_{major}$  = 21.08 min,  $t_{minor}$  = 46.67 min.

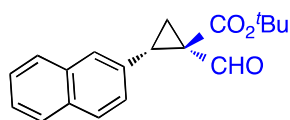

**tert-butyl 1-formyl-2-(naphthalen-2-yl)cyclopropanecarboxylate (1j):**

$[\alpha]_D^{20} = -170.82$  ( $c = 1.00$ ,  $\text{CHCl}_3$ ).  $^1\text{H NMR}$  (250 MHz,  $\text{CDCl}_3$ ):  $\delta$  9.86 (s, 1H), 7.79-7.14 (m, 7H), 3.45 (t,  $J = 8.91$  Hz, 1H), 2.40 (dd,  $J = 8.66$ , 4.36 Hz, 1H), 1.98 (dd,  $J = 9.04$ , 4.32 Hz, 1H), 1.50 (s, 9H).  $^{13}\text{C NMR}$  (62.5 MHz,  $\text{CDCl}_3$ ):  $\delta$  195.2, 169.6, 133.0, 132.7, 130.5, 128.6, 127.9, 127.7, 127.6, 127.5, 126.2, 126.1, 82.6, 42.2, 41.5, 28.2, 20.0. IR (neat,  $\text{cm}^{-1}$ ): 1702, 1369, 1315, 1142, 1101, 752, 736. HRMS (ESI) ( $[\text{M}+\text{H}]^+$ ) Calcd. for  $\text{C}_{19}\text{H}_{21}\text{O}_3$ : 297.1485, Found: 297.1490.

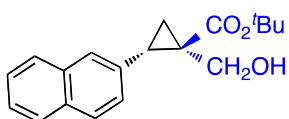

**tert-butyl 1-(hydroxymethyl)-2-(naphthalen-2-yl)**

**cyclopropanecarboxylate (1ja):**  $[\alpha]_D^{20} = -153.60$  ( $c = 0.89$ ,  $\text{CHCl}_3$ ).  $^1\text{H NMR}$  (250 MHz,  $\text{CDCl}_3$ ):  $\delta$  7.71 (d,  $J = 8.80$  Hz, 3H), 7.59 (s, 1H), 7.47-7.31 (m, 3H), 3.48-3.36 (m, 1H), 3.35-3.23 (m, 1H), 3.01 (t,  $J = 7.94$  Hz, 1H), 2.4 (br, 1H), 1.62 (dd,  $J = 8.86$ , 4.85 Hz, 1H), 1.47 (m, 10H).  $^{13}\text{C NMR}$  (62.5 MHz,  $\text{CDCl}_3$ ):  $\delta$  173.7, 133.7, 133.2, 132.5, 127.9, 127.8, 127.6, 127.3, 126.9, 126.2, 125.8, 81.6, 62.2, 32.7, 31.1, 28.2, 17.5. HRMS (ESI) ( $[\text{M}+\text{Na}]^+$ ) Calcd. for  $\text{C}_{19}\text{H}_{22}\text{O}_3\text{Na}$ : 321.1461, Found: 321.1456. HPLC analysis: *ee* = 95%. OD-H (97% hexanes: 3% isopropanol, 0.8 ml/min)  $t_{major}$  = 29.44 min,  $t_{minor}$  = 18.00 min.

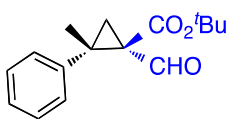

**tert-butyl 1-formyl-2-methyl-2-phenylcyclopropanecarboxylate (1k):**

$[\alpha]_D^{20} = -113.47$  ( $c = 0.49$ ,  $\text{CHCl}_3$ ).  $^1\text{H NMR}$  (250 MHz,  $\text{CDCl}_3$ ):  $\delta$  9.44 (s, 1H), 7.33-7.08 (m, 5H), 2.18 (d,  $J = 4.96$  Hz, 1H), 1.79 (d,  $J = 4.96$  Hz, 1H), 1.51 (s, 12H).  $^{13}\text{C NMR}$  (62.5 MHz,  $\text{CDCl}_3$ ):  $\delta$  196.1, 167.9, 140.0, 128.8, 128.5, 127.3, 82.4, 48.0, 44.2, 28.3, 23.4, 23.3. IR (neat,  $\text{cm}^{-1}$ ): 1702, 1369, 1275, 1154, 1127, 1052, 757, 700. HRMS (ESI) ( $[\text{M}+\text{H}]^+$ ) Calcd. for  $\text{C}_{16}\text{H}_{21}\text{O}_3$ : 261.1485, Found: 261.1485. HPLC analysis: *ee* = 94%. Whelk (98% hexanes: 2% isopropanol, 0.8 ml/min)  $t_{major}$  = 11.58 min,  $t_{minor}$  = 18.90 min.

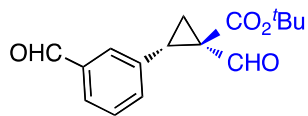

**tert-butyl 1-formyl-2-(3-formylphenyl)cyclopropanecarboxylate (1l):**

$[\alpha]_D^{20} = -68.55$  ( $c = 1.00$ ,  $\text{CHCl}_3$ ).  $^1\text{H NMR}$  (400 MHz,  $\text{CDCl}_3$ ):  $\delta$  9.97 (s, 1H), 9.95 (s, 1H), 7.74 (t,  $J = 8.29$  Hz, 2H), 7.50-7.41 (m, 2H), 3.40 (t,  $J = 8.87$  Hz, 1H), 2.33 (dd,  $J = 8.65$ , 4.41 Hz, 1H), 2.02 (dd,  $J = 9.00$ , 4.54 Hz, 1H), 1.55 (s, 9H).  $^{13}\text{C NMR}$  (100 MHz,  $\text{CDCl}_3$ ):  $\delta$  195.3, 192.0, 169.1, 136.1, 135.5, 134.4, 130.6, 129.2, 128.7,

82.8, 41.7, 40.1, 28.1, 20.4. IR (neat,  $\text{cm}^{-1}$ ): 1700, 1369, 1295, 1144, 751. HPLC analysis: *ee* = 95%. OJ-H (95% hexanes: 5% isopropanol, 1.0 ml/min)  $t_{\text{major}} = 11.54$  min,  $t_{\text{minor}} = 10.17$  min.

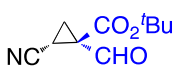

**(1R,2R)-tert-butyl 2-cyano-1-formylcyclopropanecarboxylate (1m):** *Major* isomer:  $^1\text{H}$  NMR (500 MHz,  $\text{CDCl}_3$ ):  $\delta$  10.25 (s, 1H), 2.37 (dd,  $J = 9.52, 7.54$  Hz, 1H), 2.11-2.04 (m, 1H), 1.81 (dd,  $J = 9.55, 4.28$  Hz, 1H), 1.58 (s, 9H). *Minor* isomer:  $^1\text{H}$  NMR (500 MHz,  $\text{CDCl}_3$ ):  $\delta$  10.26 (s, 1H), 2.49 (dd,  $J = 9.46, 7.65$  Hz, 1H), 2.11-2.04 (m, 1H), 1.89 (dd,  $J = 9.48, 4.26$  Hz, 1H), 1.54 (s, 9H).  $^{13}\text{C}$  NMR (125 MHz,  $\text{CDCl}_3$ ):  $\delta$  195.3, 193.2, 166.3, 165.3, 115.9, 115.2, 84.9, 84.6, 37.4, 37.3, 27.9, 22.9, 21.7, 16.9, 16.3. IR (neat,  $\text{cm}^{-1}$ ): 2250, 1712, 1325, 1144, 840. HRMS (ESI) ( $[\text{M}+\text{H}]^+$ ) Calcd. for  $\text{C}_{10}\text{H}_{14}\text{NO}_3$ : 178.0974, Found: 178.0974. HPLC analysis: *ee* (*major*) = 77 %. AD-H (99% hexanes: 1% isopropanol, 1.0 ml/min)  $t_{\text{major}} = 25.28$  min,  $t_{\text{minor}} = 11.49$  min.

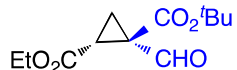

**tert-butyl 2-ethyl 1-formylcyclopropane-1,2-dicarboxylate (1n):**  $[\alpha]_{\text{D}}^{20} = -16.37$  ( $c = 0.98$ ,  $\text{CHCl}_3$ ). *Major* isomer:  $^1\text{H}$  NMR (250 MHz,  $\text{CDCl}_3$ ):  $\delta$  9.93 (s, 1H), 4.08 (m, 2H), 2.63 (t,  $J = 8.22$  Hz, 1H), 2.07-1.91 (m, 1H), 1.72-1.54 (m, 1H), 1.43 (s, 9H), 1.26-1.11 (m, 3H). *Minor* isomer:  $^1\text{H}$  NMR (250 MHz,  $\text{CDCl}_3$ ):  $\delta$  9.94 (s, 1H), 4.08 (m, 7H), 2.50 (t,  $J = 8.44$  Hz, 1H), 2.07-1.91 (m, 1H), 1.72-1.54 (m, 1H), 1.43 (s, 9H), 1.26-1.11 (m, 3H).  $^{13}\text{C}$  NMR (62.5 MHz,  $\text{CDCl}_3$ ):  $\delta$  195.3, 193.3, 166.7, 166.6, 166.5, 165.3, 82.3, 82.0, 60.6, 60.5, 39.8, 38.1, 31.9, 31.5, 27.0, 26.9, 20.1, 19.2, 13.1, 13.0. IR (neat,  $\text{cm}^{-1}$ ): 1724, 1370, 1290, 1143, 752. HRMS (ESI) ( $[\text{M}+\text{H}]^+$ ) Calcd. for  $\text{C}_{12}\text{H}_{19}\text{O}_5$ : 243.1227, Found: 243.1229. GC analysis: *ee* (*major*) = 96 %. CP-Chirasil-Dex CB (Temp program: initial temp =  $50^\circ\text{C}$ , hold time = 5 min, Rate:  $5.00^\circ\text{C}/\text{min}$ , max temp =  $200^\circ\text{C}$ , hold time = 5 min):  $t_{\text{minor}} = 25.80$  min,  $t_{\text{major}} = 25.74$  min.

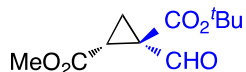

**1-tert-butyl 2-methyl 1-formylcyclopropane-1,2-dicarboxylate (1o):**  $[\alpha]_{\text{D}}^{20} = -15.19$  ( $c = 1.01$ ,  $\text{CHCl}_3$ ). *Major* isomer:  $^1\text{H}$  NMR (250 MHz,  $\text{CDCl}_3$ ):  $\delta$  9.94 (s, 1H), 3.64 (s, 3H), 2.64 (dd,  $J = 8.94, 7.82$  Hz, 1H), 2.06-1.93 (m, 1H), 1.72-1.60 (m, 1H), 1.43 (s, 9H). *Minor* isomer:  $^1\text{H}$  NMR (250 MHz,  $\text{CDCl}_3$ ):  $\delta$  9.96 (s, 1H), 3.65 (s, 3H), 2.51 (m, 1H), 2.06-1.93 (m, 1H), 1.72-1.60 (m, 1H), 1.44 (s, 9H).  $^{13}\text{C}$  NMR (62.5 MHz,  $\text{CDCl}_3$ ):  $\delta$  196.3, 194.4, 168.1, 168.0, 167.7, 166.4, 83.4, 83.1, 52.5, 52.4, 40.7, 39.1, 32.7, 32.3, 28.0, 27.9, 21.2, 20.4. IR (neat,  $\text{cm}^{-1}$ ): 1712, 1370, 1290, 1249, 1142, 843, 753. HRMS (ESI) ( $[\text{M}+\text{H}]^+$ ) Calcd. for  $\text{C}_{11}\text{H}_{17}\text{O}_5$ : 229.1071, Found: 229.1071. GC analysis: *ee*

(*major*) = 97 %. CP-Chirasil-Dex CB (Temp program: initial temp = 50° C, hold time = 5 min, Rate: 5.00° C/min, max temp = 200° C, hold time = 5 min)  $t_{\text{minor}} = 24.68$  min,  $t_{\text{major}} = 24.63$  min.

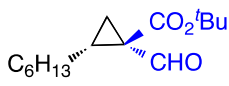 ***tert*-butyl 1-formyl-2-hexylcyclopropanecarboxylate (1p):**  $[\alpha]_{\text{D}}^{20} = -7.13$  ( $c = 1.01$ ,  $\text{CHCl}_3$ ).  $^1\text{H NMR}$  (400 MHz,  $\text{CDCl}_3$ ):  $\delta$  10.28 (s, 1H), 2.07-1.96 (m, 1H), 1.63 (ddd,  $J = 18.88, 8.68, 3.59$  Hz, 2H), 1.46 (m, 11H), 1.28-1.19 (m, 8H), 0.85 (t,  $J = 6.90$  Hz, 3H).  $^{13}\text{C NMR}$  (100 MHz,  $\text{CDCl}_3$ ):  $\delta$  197.9, 170.4, 81.8, 39.3, 31.6, 29.6, 28.6, 28.1, 28.0, 25.8, 23.5, 22.5, 13.9. IR (neat,  $\text{cm}^{-1}$ ): 1702, 1369, 1296, 1144, 751. HRMS (ESI) ( $[\text{M}+\text{Na}]^+$ ) Calcd. for  $\text{C}_{15}\text{H}_{27}\text{O}_3$ : 277.1774, Found: 277.1781. GC analysis:  $ee = 80$  %. CP-Chirasil-Dex CB (Temp program: initial temp = 50° C, hold time = 5 min; Rate: 3.00° C/min, max temp = 200° C, hold time = 5 min)  $t_{\text{minor}} = 37.68$  min,  $t_{\text{major}} = 37.53$  min.

## V. Further Transformations of Chiral 1,1-Cyclopropaneformylesters

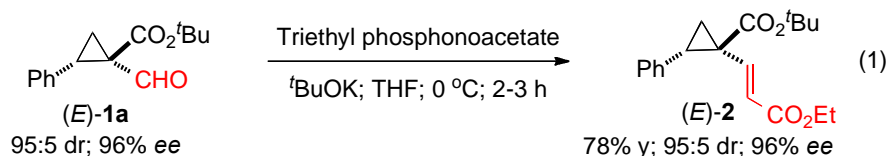

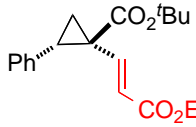 **(E)-*tert*-butyl 1-(3-ethoxy-3-oxoprop-1-enyl)-2-phenylcyclopropanecarboxylate (2):** To an RBF containing potassium *tert*-butoxide (40.0 mg, 0.36 mmol) in THF (5 ml) at 0 °C, triethyl phosphonoacetate (81 mg, 0.36 mmol) in THF (2 ml) was added slowly via syringe. The mixture was allowed to stir for 30 min and then cyclopropane aldehyde **1a** (74 mg, 0.3 mmol) in THF (3 ml) was added dropwise via syringe. The reaction was allowed to stir at 0 °C for 2 h at which time TLC indicated all starting material was consumed. The reaction was then quenched by the addition of water. This mixture is extracted with ether (3 x 5 ml) and the combined organics are dried over  $\text{Na}_2\text{SO}_4$ . After concentration the crude mixture was purified by silica gel column chromatography to give pure product **2** in 78% yield.  $[\alpha]_{\text{D}}^{20} = -36.11$  ( $c = 0.97$ ,  $\text{CHCl}_3$ ).  $^1\text{H NMR}$  (400 MHz,  $\text{CDCl}_3$ ):  $\delta$  7.29-7.06 (m, 6H), 6.87 (d,  $J = 15.95$  Hz, 1H), 5.60 (d,  $J = 15.95$  Hz, 1H), 4.04 (q,  $J = 7.11$  Hz, 2H), 3.12 (t,  $J = 8.42$  Hz, 1H), 2.01 (dd,  $J = 9.15, 5.04$  Hz, 1H), 1.68 (dd,  $J = 7.65, 5.04$  Hz, 1H), 1.50 (s, 9H), 1.17 (t,  $J = 7.11$  Hz, 3H),  $^{13}\text{C NMR}$  (100 MHz,  $\text{CDCl}_3$ ):  $\delta$  170.9, 166.1, 142.9, 134.6, 129.4, 128.2, 127.1, 121.3, 81.6, 60.0, 37.0, 33.1, 28.0, 19.8, 14.1. IR (neat,  $\text{cm}^{-1}$ ): 1709, 1369, 1270, 1185, 1145, 750. HRMS (ESI) ( $[\text{M}+\text{Na}]^+$ ) Calcd. for  $\text{C}_{19}\text{H}_{24}\text{O}_4\text{Na}$ : 339.1567, Found:

339.1575. HPLC analysis: *ee* = 96%. Whelk (99% hexanes: 9% isopropanol, 1.0 ml/min)  $t_{major}$  = 16.79 min,  $t_{minor}$  = 22.21 min.

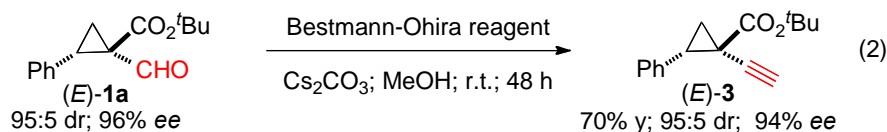

**tert-butyl 1-ethynyl-2-phenylcyclopropanecarboxylate (3):** In a flame-dried flask under an atmosphere of nitrogen, the cyclopropane aldehyde **1a** (74 mg, 0.3 mmol) was dissolved in methanol (10 ml), and  $\text{Cs}_2\text{CO}_3$  (815 mg, 2.5 mmol) was added. Then, the Bestmann-Ohira reagent<sup>3</sup> (192 mg, 1.0 mmol) was added, and the reaction mixture was stirred at room temperature for 48 h. After complete conversion, water was added, and the aqueous layer was extracted with ether (3 x 5 ml) and the combined organics are dried over  $\text{Na}_2\text{SO}_4$ , and filtered. The solvent was removed under reduced pressure, and the product was purified by flash column chromatography to give pure product **3** in 70% yield.  $[\alpha]_D^{20} = -46.23$  ( $c = 0.98$ ,  $\text{CHCl}_3$ ).  $^1\text{H NMR}$  (400 MHz,  $\text{CDCl}_3$ ):  $\delta$  7.30 (m, 5H), 2.93 (t,  $J = 8.66$  Hz, 1H), 1.99 (s, 1H), 1.96 (dd,  $J = 9.20, 4.62$  Hz, 1H), 1.69 (dd,  $J = 7.92, 4.62$  Hz, 1H), 1.50 (s, 9H).  $^{13}\text{C NMR}$  (100 MHz,  $\text{CDCl}_3$ ):  $\delta$  169.9, 135.4, 128.7, 127.9, 127.1, 82.0, 80.1, 71.3, 34.7, 27.9, 25.5, 23.6. IR (neat,  $\text{cm}^{-1}$ ): 1714, 1369, 1302, 1267, 1149, 755, 695. HRMS (ESI) ( $[\text{M}+\text{Na}]^+$ ) Calcd. for  $\text{C}_{16}\text{H}_{18}\text{O}_2\text{Na}$ : 265.1199, Found: 265.1231. HPLC analysis: *ee* = 94%. OD-H (100% hexanes: 0% isopropanol, 1.0 ml/min)  $t_{major}$  = 19.61 min,  $t_{minor}$  = 18.22 min.

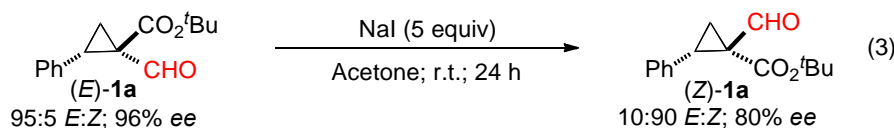

**tert-butyl 1-formyl-2-phenylcyclopropanecarboxylate ((Z)-1a):** To a solution of (*E*)-cyclopropane **1a** (0.1 mmol) in acetone (1 ml) was added NaI (0.5 mmol). The mixture was stirred at room temperature for 24 h. The resulting mixture was concentrated and the residue was dissolved in ethyl acetate, and then washed with water. The organic layer was concentrated, according to crude NMR, (*Z*)-**1a** was formed in 90% yield.  $[\alpha]_D^{20} = -131.42$  ( $c = 0.63$ ,  $\text{CHCl}_3$ ).  $^1\text{H NMR}$  (400 MHz,  $\text{CDCl}_3$ ):  $\delta$  10.32 (s, 1H), 7.27 (m, 5H), 3.13 (t,  $J = 8.86$  Hz, 1H), 2.29 (dd,  $J = 8.54, 4.27$  Hz, 1H), 1.98 (dd,  $J = 9.18, 4.27$  Hz, 1H), 1.10 (s, 9H).  $^{13}\text{C NMR}$  (100 MHz,  $\text{CDCl}_3$ ):  $\delta$  198.6, 167.1, 134.2, 129.5, 128.0, 127.6, 81.9, 43.0, 40.8, 27.5,

21.3. IR (neat,  $\text{cm}^{-1}$ ): 1707, 1326, 1144, 696. HRMS (ESI) ( $[\text{M}+\text{Na}]^+$ ) Calcd. for  $\text{C}_{15}\text{H}_{18}\text{O}_3$ : 269.1148, Found: 269.1150. GC analysis:  $ee = 79\%$ . CP-Chirasil-Dex CB (Temp program: initial temp =  $50^\circ\text{C}$ , hold time = 5 min; Rate:  $5.00^\circ\text{C}/\text{min}$ , max temp =  $200^\circ\text{C}$ , hold time = 5 min)  $t_{\text{minor}} = 28.30\text{ min}$ ,  $t_{\text{major}} = 28.60\text{ min}$ .

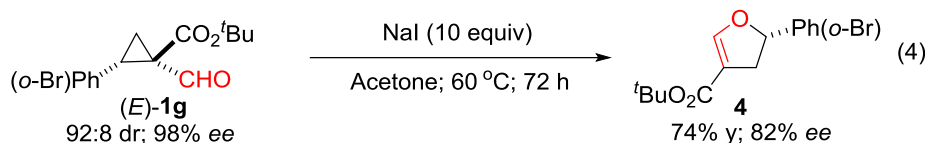

***tert*-butyl 5-(2-bromophenyl)-4,5-dihydrofuran-3-carboxylate (4):** To a solution of (*E*)-cyclopropane aldehyde **1g** (0.1 mmol) in acetone (1 ml) was added NaI (1.0 mmol). The mixture was stirred at  $60^\circ\text{C}$  for 72 h. The resulting mixture was concentrated and the residue was dissolved in ethyl acetate, and then washed with water. The organic layer was concentrated, followed by flash silica gel chromatography to give dihydrofuran **4** in 74% yield.  $[\alpha]_{\text{D}}^{20} = -57.76$  ( $c = 0.49$ ,  $\text{CHCl}_3$ ).  $^1\text{H NMR}$  (400 MHz,  $\text{CDCl}_3$ ):  $\delta$  7.19-7.14 (m, 1H), 7.56 (dd,  $J = 7.97, 1.13\text{ Hz}$ , 1H), 7.38 (dd,  $J = 7.80, 1.74\text{ Hz}$ , 1H), 7.33 (dd,  $J = 7.36, 0.97\text{ Hz}$ , 1H), 7.31 (t,  $J = 1.88\text{ Hz}$ , 1H), 5.97 (dd,  $J = 11.05, 8.04\text{ Hz}$ , 1H), 3.43 (ddd,  $J = 15.10, 11.06, 1.96\text{ Hz}$ , 1H), 2.61 (ddd,  $J = 15.10, 8.04, 1.84\text{ Hz}$ , 1H), 1.46 (s, 9H).  $^{13}\text{C NMR}$  (100 MHz,  $\text{CDCl}_3$ ):  $\delta$  164.3, 155.2, 140.9, 132.7, 129.2, 127.6, 126.2, 120.7, 110.2, 84.7, 80.0, 35.9, 28.2. IR (neat,  $\text{cm}^{-1}$ ): 1698, 1630, 1123, 1099, 752. HRMS (ESI) ( $[\text{M}+\text{Na}]^+$ ) Calcd. for  $\text{C}_{15}\text{H}_{17}\text{BrO}_3\text{Na}$ : 347.0253, Found: 347.0263. HPLC analysis:  $ee = 82\%$ . Whelk (99% hexanes: 1% isopropanol, 0.8 ml/min)  $t_{\text{major}} = 11.82\text{ min}$ ,  $t_{\text{minor}} = 13.94\text{ min}$ .

## VI. X-ray Crystallography

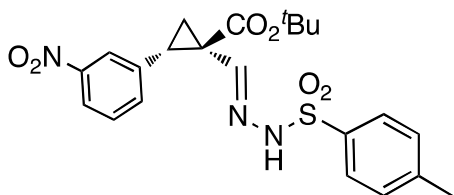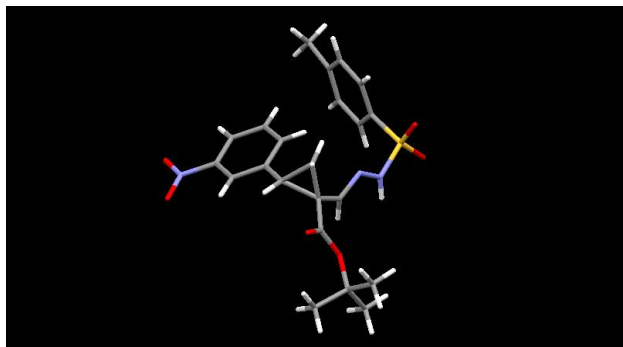

|                                       |                                                                 |
|---------------------------------------|-----------------------------------------------------------------|
| Identification code                   | <b>1ha</b>                                                      |
| Empirical formula                     | C <sub>22</sub> H <sub>25</sub> N <sub>3</sub> O <sub>6</sub> S |
| Formula weight                        | 459.51                                                          |
| Temperature/K                         | 100.0                                                           |
| Crystal system                        | monoclinic                                                      |
| Space group                           | P21                                                             |
| a/Å                                   | 13.2053(5)                                                      |
| b/Å                                   | 5.3447(2)                                                       |
| c/Å                                   | 15.9599(7)                                                      |
| α/°                                   | 90                                                              |
| β/°                                   | 93.6740(10)                                                     |
| γ/°                                   | 90                                                              |
| Volume/Å <sup>3</sup>                 | 1124.11(8)                                                      |
| Z                                     | 2                                                               |
| ρ <sub>calc</sub> /mg/mm <sup>3</sup> | 1.358                                                           |
| m/mm <sup>-1</sup>                    | 1.656                                                           |

|                                             |                                                               |
|---------------------------------------------|---------------------------------------------------------------|
| F(000)                                      | 484.0                                                         |
| Crystal size/mm <sup>3</sup>                | 0.16 × 0.14 × 0.11                                            |
| Radiation                                   | CuK $\alpha$ ( $\lambda = 1.54178$ )                          |
| 2 $\Theta$ range for data collection        | 8.43 to 132.63°                                               |
| Index ranges                                | -15 ≤ h ≤ 15, -6 ≤ k ≤ 6, -18 ≤ l ≤ 18                        |
| Reflections collected                       | 13901                                                         |
| Independent reflections                     | 3462 [R <sub>int</sub> = 0.0437, R <sub>sigma</sub> = 0.0392] |
| Data/restraints/parameters                  | 3462/1/301                                                    |
| Goodness-of-fit on F <sup>2</sup>           | 1.070                                                         |
| Final R indexes [I ≥ 2 $\sigma$ (I)]        | R <sub>1</sub> = 0.0258, wR <sub>2</sub> = 0.0595             |
| Final R indexes [all data]                  | R <sub>1</sub> = 0.0267, wR <sub>2</sub> = 0.0604             |
| Largest diff. peak/hole / e Å <sup>-3</sup> | 0.26/-0.17                                                    |
| Flack parameter                             | 0.092(8)                                                      |

The X-ray diffraction data for compound **1ha** were measured on a Bruker D8 Venture PHOTON 100 CMOS system equipped with a Cu K $\alpha$  INCOATEC Imus micro-focus source ( $\lambda = 1.54178$  Å). Indexing was performed using *APEX2* [1] (Difference Vectors method). Data integration and reduction were performed using SaintPlus 6.01 [2]. Absorption correction was performed by multi-scan method implemented in SADABS [3]. Space groups were determined using XPREP implemented in APEX2 [1]. The structure was solved using SHELXS-97 (direct methods) and refined using SHELXL-97 (full-matrix least-squares on F<sup>2</sup>) contained in APEX2 [1] and WinGX v1.70.01 [4,5,6,7] programs packages. All non-hydrogen atoms were refined anisotropically. H9 hydrogen atom of -NH group and H15 of -CH group have been found from difference Fourier

map and were freely refined. The remaining hydrogen atoms were placed in geometrically calculated positions and included in the refinement process using riding model with isotropic thermal parameters:  $U_{iso}(H) = 1.2U_{eq}(-CH,-CH_2)$ ,  $U_{iso}(H) = 1.5U_{eq}(-CH_3)$ . Crystal data and refinement conditions are shown in Table S1.

[1] Bruker (2008). *APEX2* (Version 2008.1-0). Bruker AXS Inc., Madison, Wisconsin, USA.

[2] Bruker (2001b). SAINT-V6.28A. Data Reduction Software.

[3] Sheldrick, G. M. (1996). *SADABS. Program for Empirical Absorption Correction*. University of Gottingen, Germany.

[4] Farrugia L.J. *Appl. Cryst.* (1999). 32, 837±838

[5] Sheldrick, G.M. (1997) SHELXL-97. Program for the Refinement of Crystal

[6] Sheldrick, G.M. (1990) *Acta Cryst.* A46, 467-473

[7] Sheldrick, G. M. (2008). *Acta Cryst.* A64, 112-122.

## VII. References

- (1) Stojanov.Fm; Arnold, Z. *Collect. Czech. Chem. C.* **1967**, 32, 2155.
- (2) Gao, L. Z.; Hwang, G. S.; Ryu, D. H. *J. Am. Chem. Soc.* **2011**, 133, 20708.
- (3) Ohira, S. *Syn. Comm.* **1989**, 19, 561.



9.627

4.334  
4.305  
4.300  
4.277  
4.272  
4.248  
4.243

1.312  
1.307  
1.284  
1.278  
1.255  
1.250

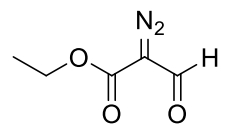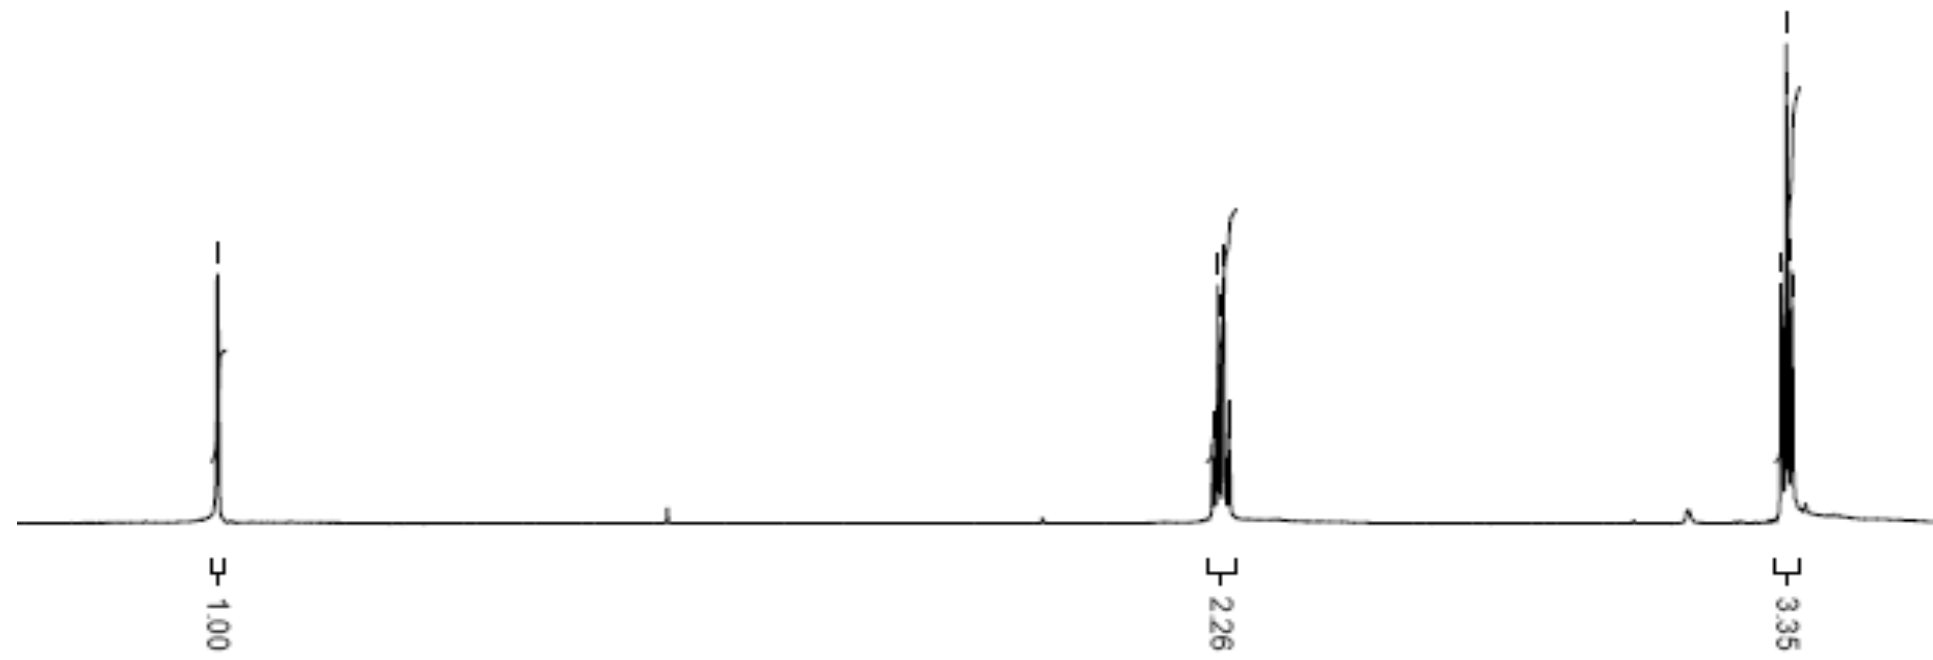

10.0

5.0

S16

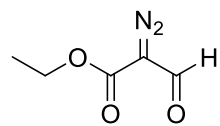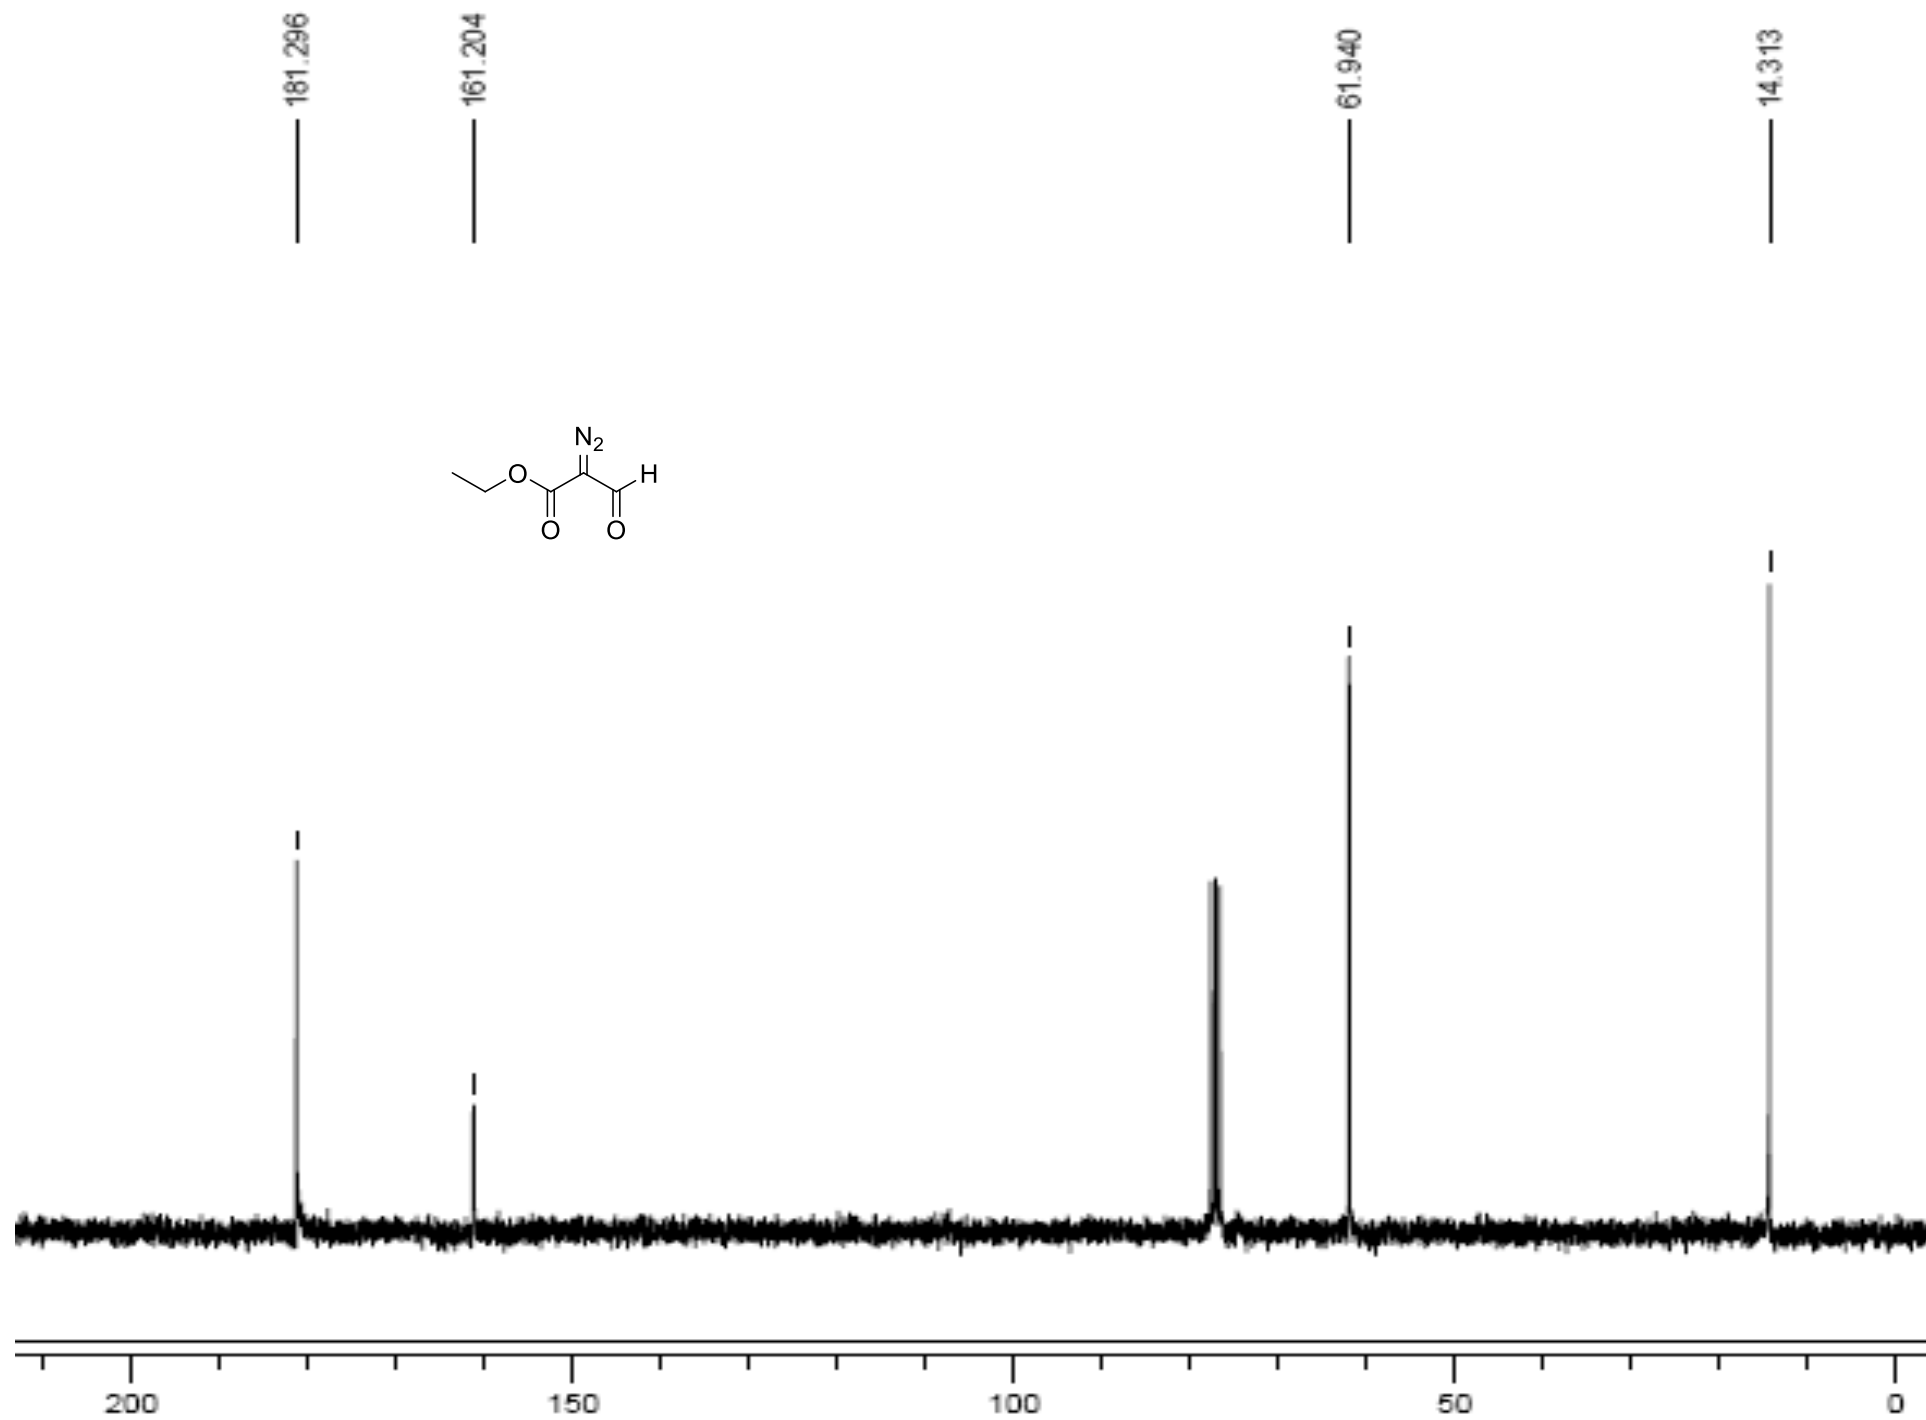

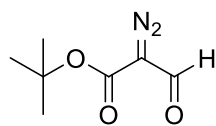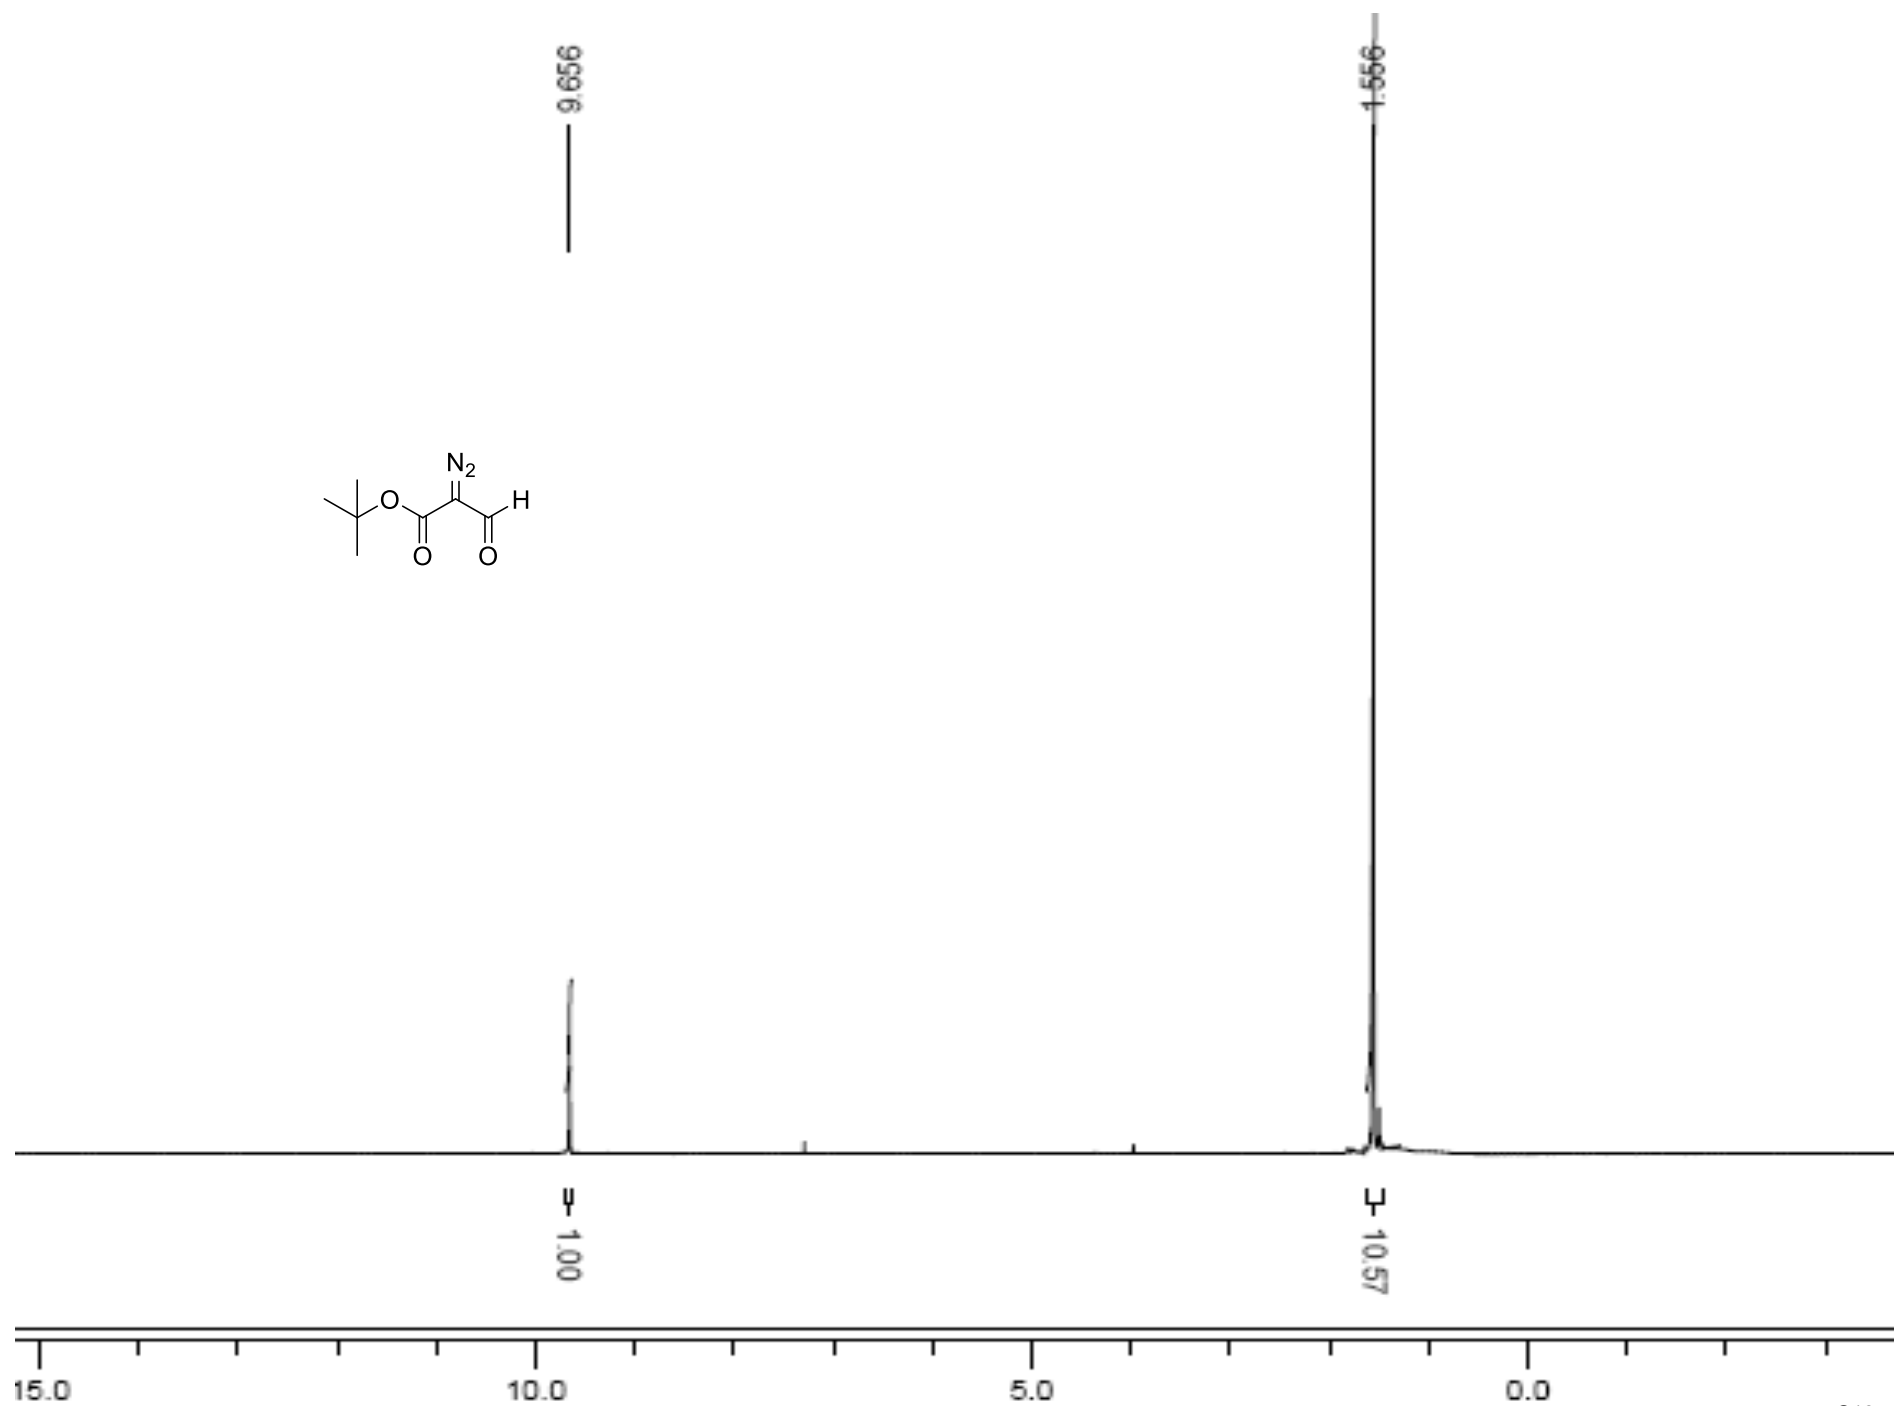

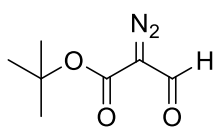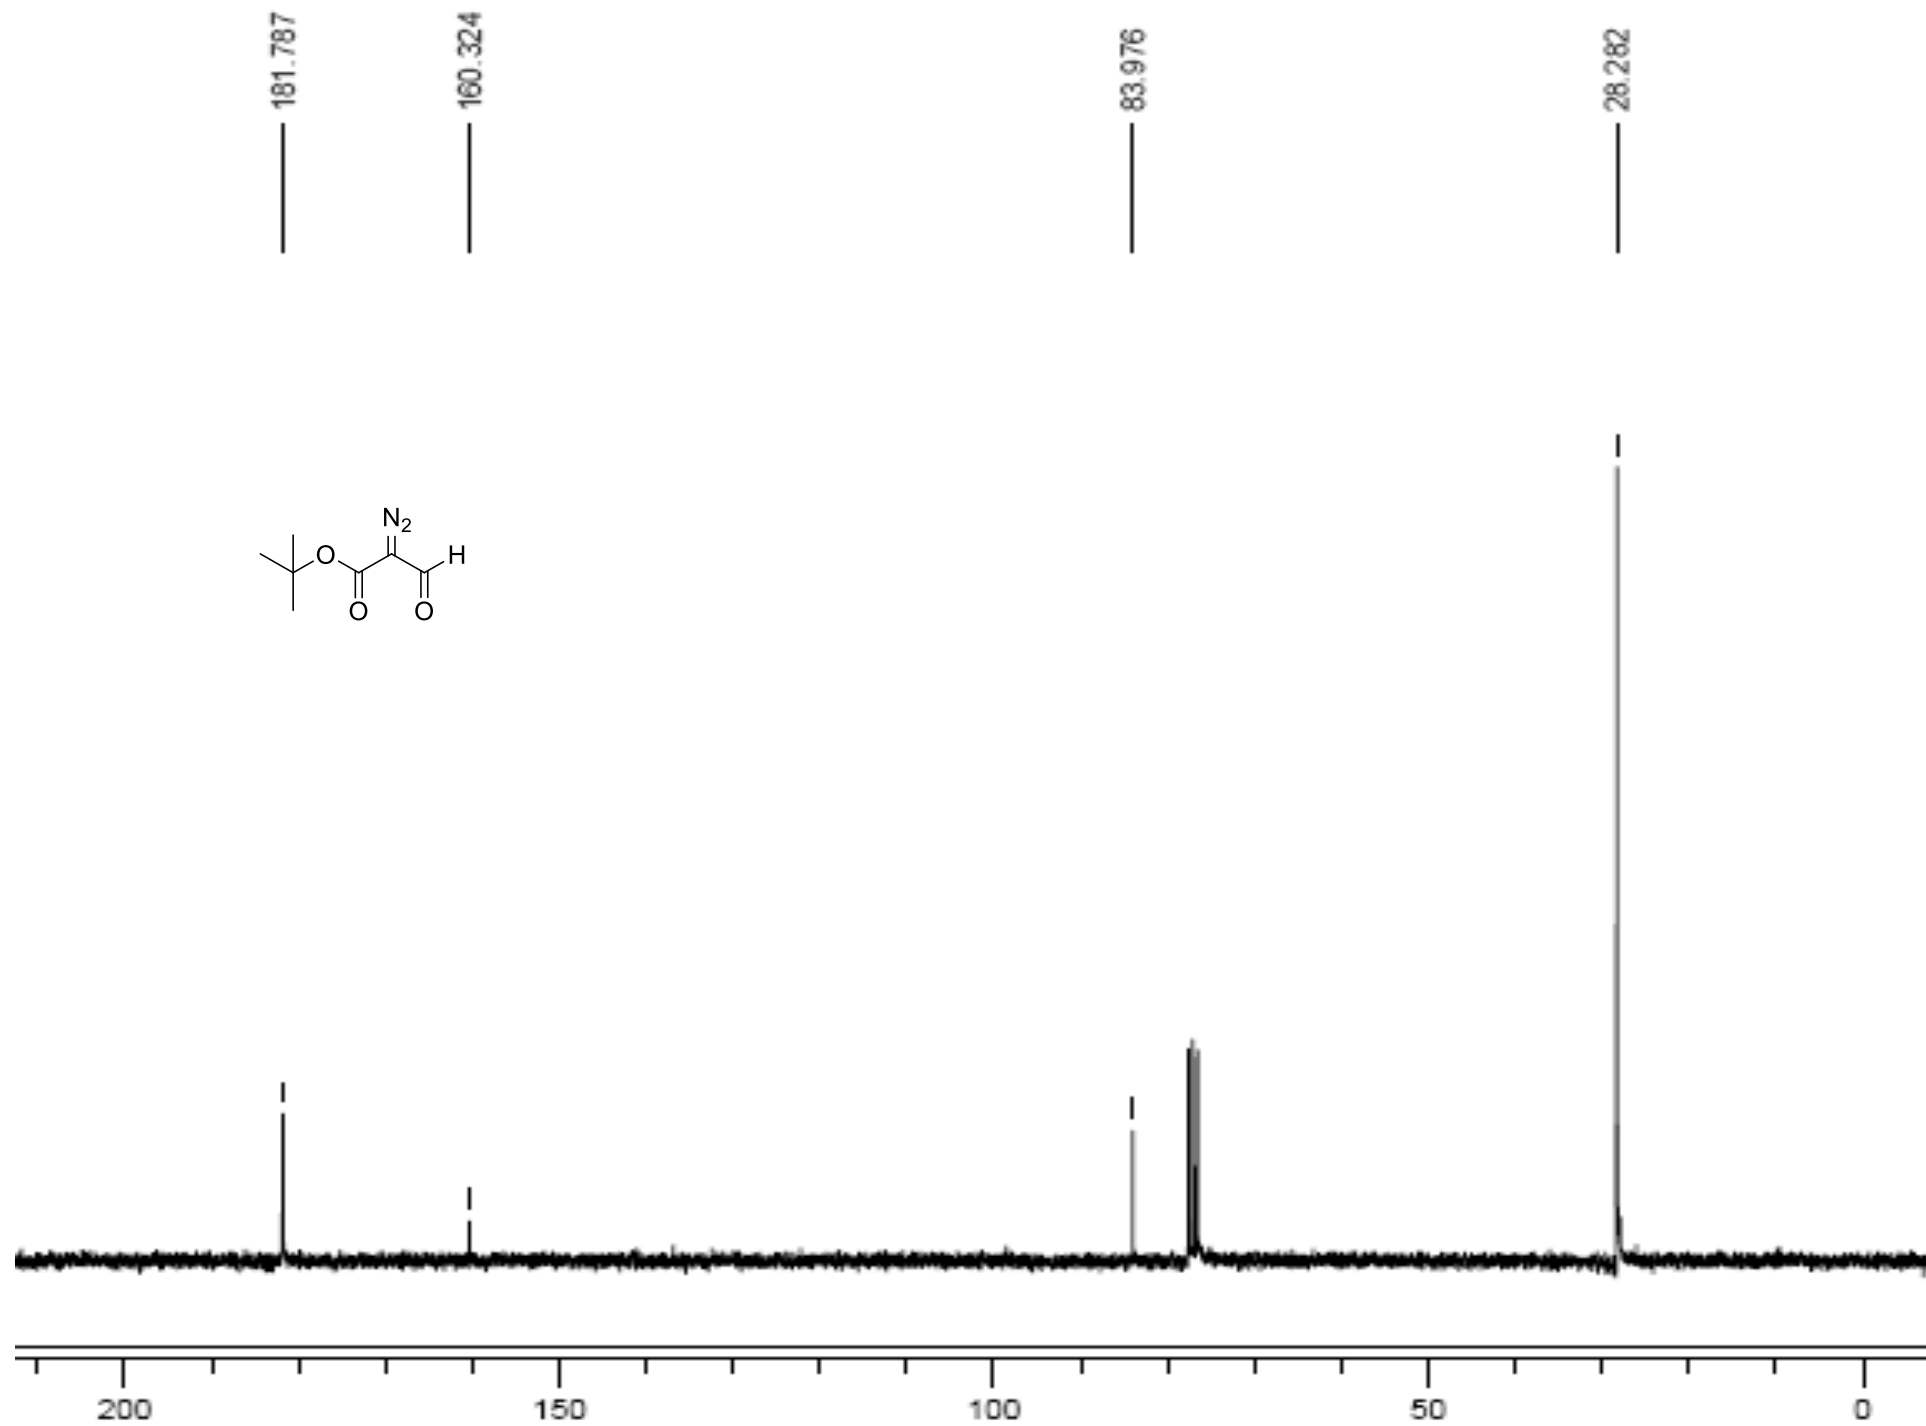

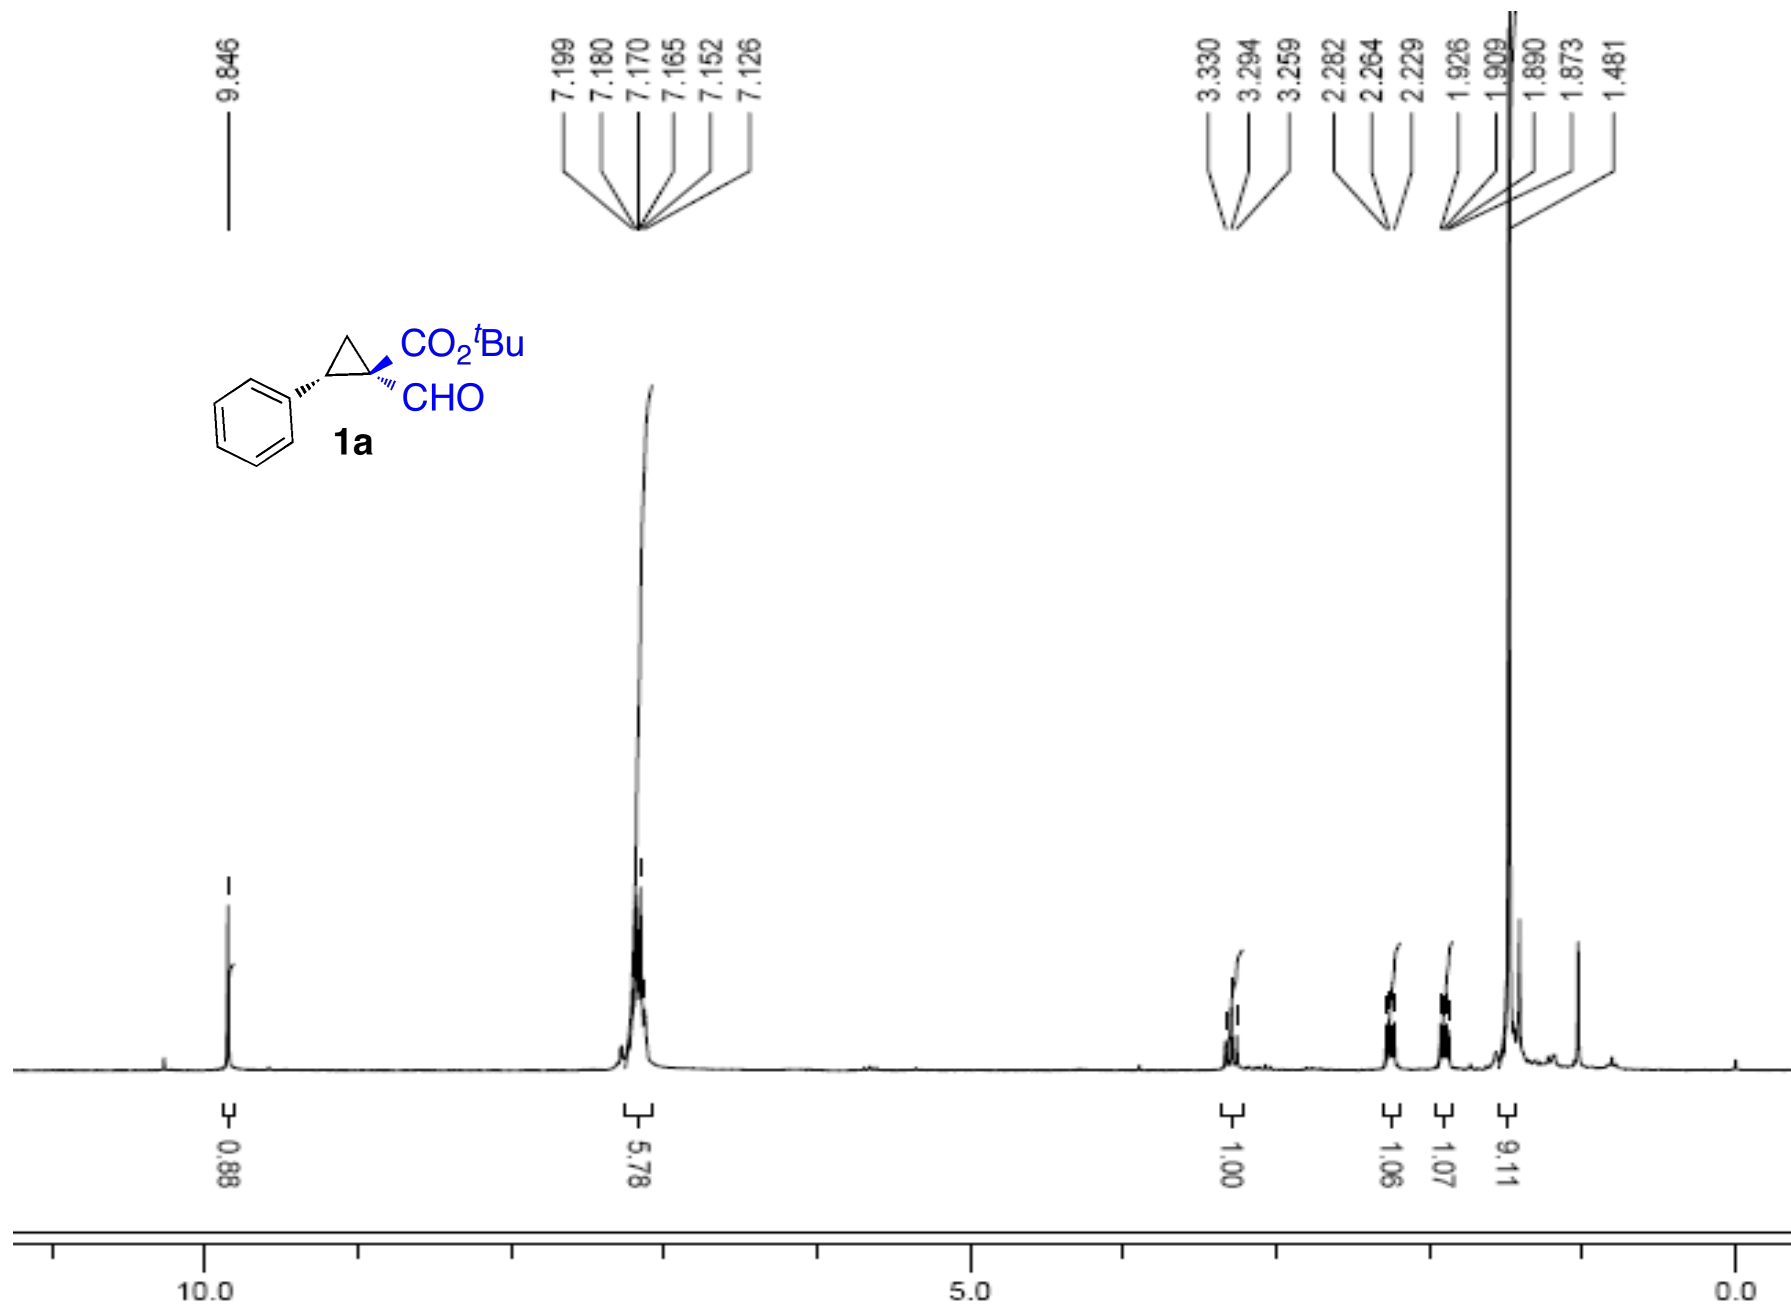

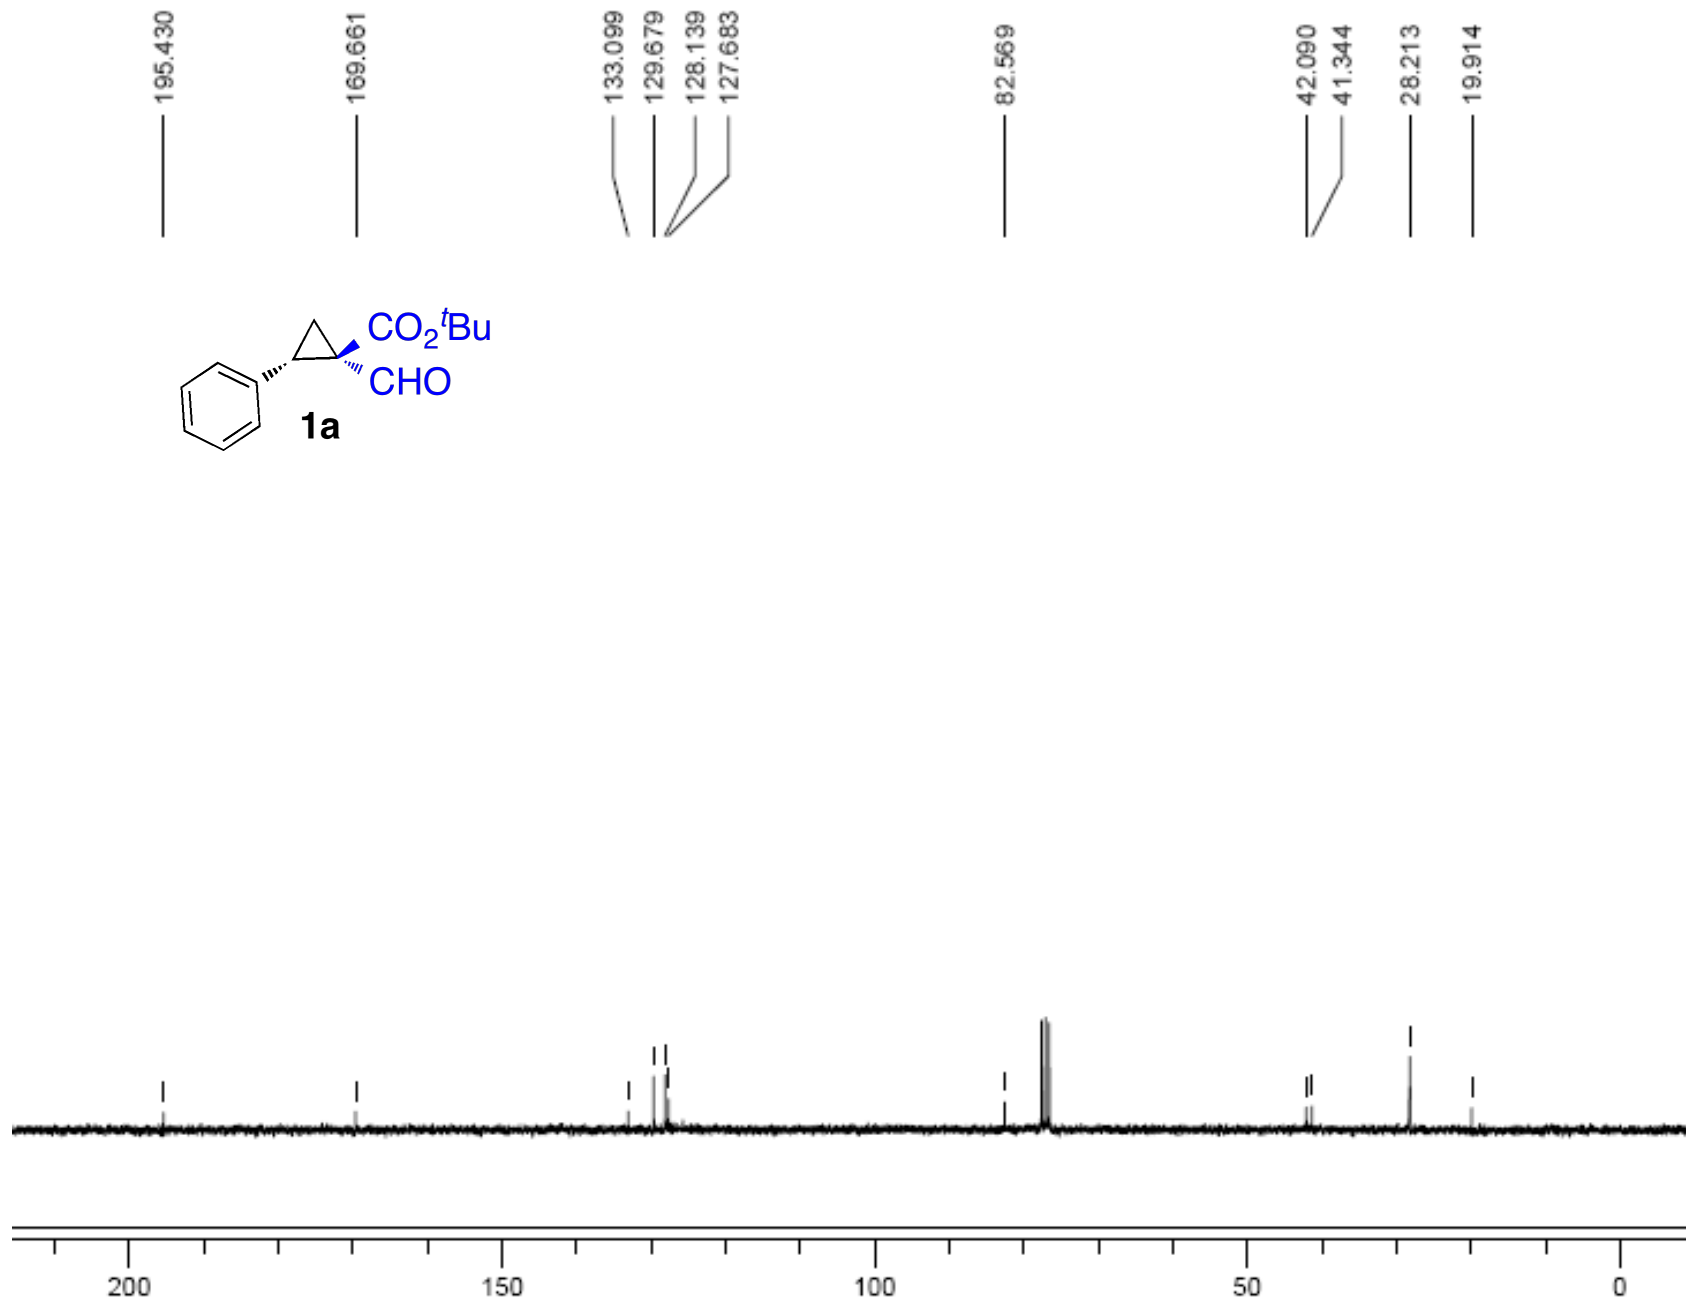

xx-vi-7 OJH 3%@0.8 ml  
 C:\EZStart\Projects\Default\Method\yang-ADH 5% 1.0ml.met  
 C:\EZStart\Projects\Default\Data\xx-vi-7 OJH 3%@0.8 ml

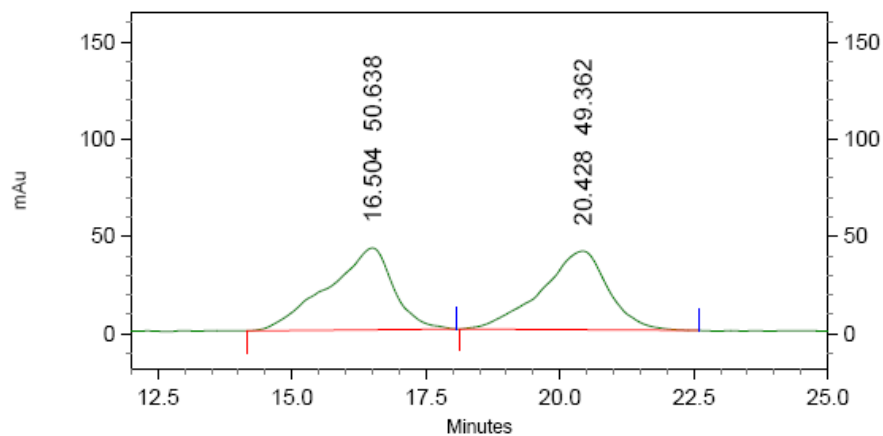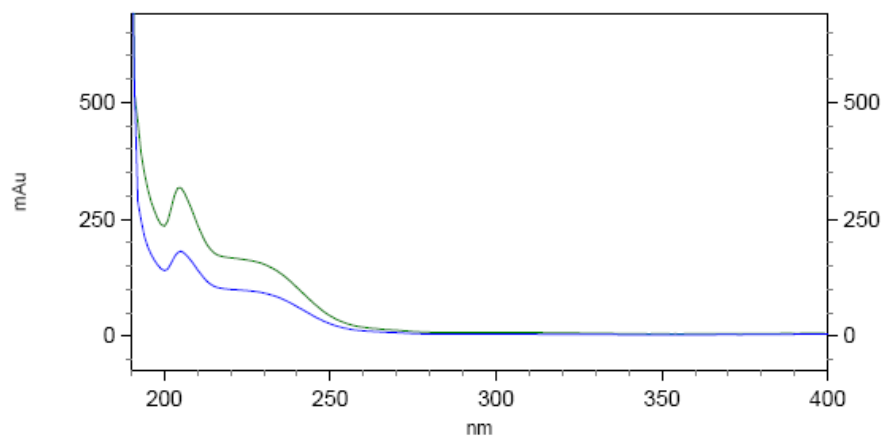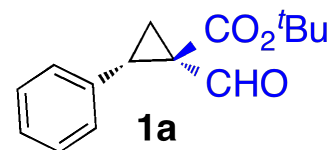

4: 231 nm, 4 nm  
 Results

| Pk #   | Name | Retention Time | Area Percent |
|--------|------|----------------|--------------|
| 1      |      | 16.504         | 50.638       |
| 2      |      | 20.428         | 49.362       |
| Totals |      |                | 100.000      |

xx-vi-289 OJH 3%@0.8 ml again

C:\EZStart\Projects\Default\Method\Shifa 4-t-Butylbenzene (OD-H 10-90).met

C:\EZStart\Projects\Default\Data\xx-vi-289 OJH 3%@0.8 ml again

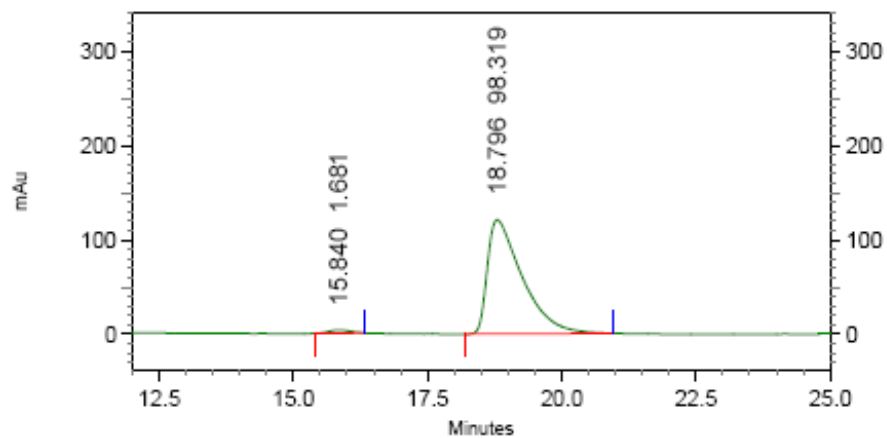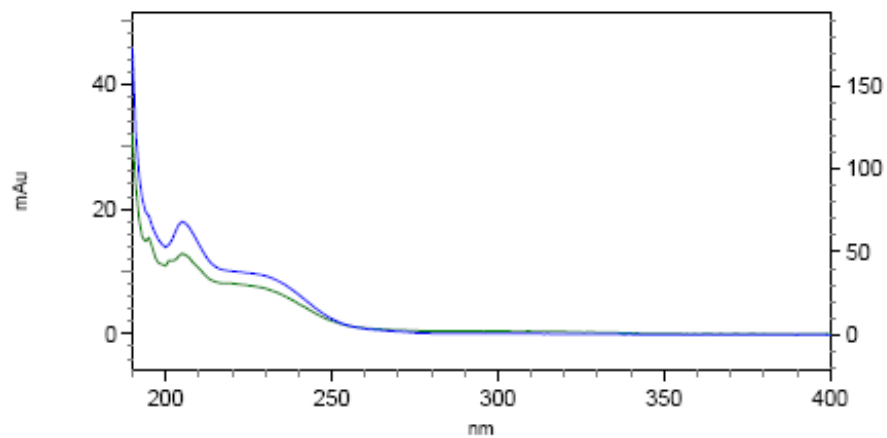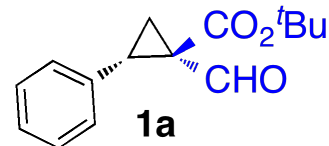

3: 226 nm, 4 nm

Results

| Pk # | Name | Retention Time | Area Percent |
|------|------|----------------|--------------|
| 1    |      | 15.840         | 1.681        |
| 2    |      | 18.796         | 98.319       |

|        |  |  |         |
|--------|--|--|---------|
| Totals |  |  | 100.000 |
|--------|--|--|---------|



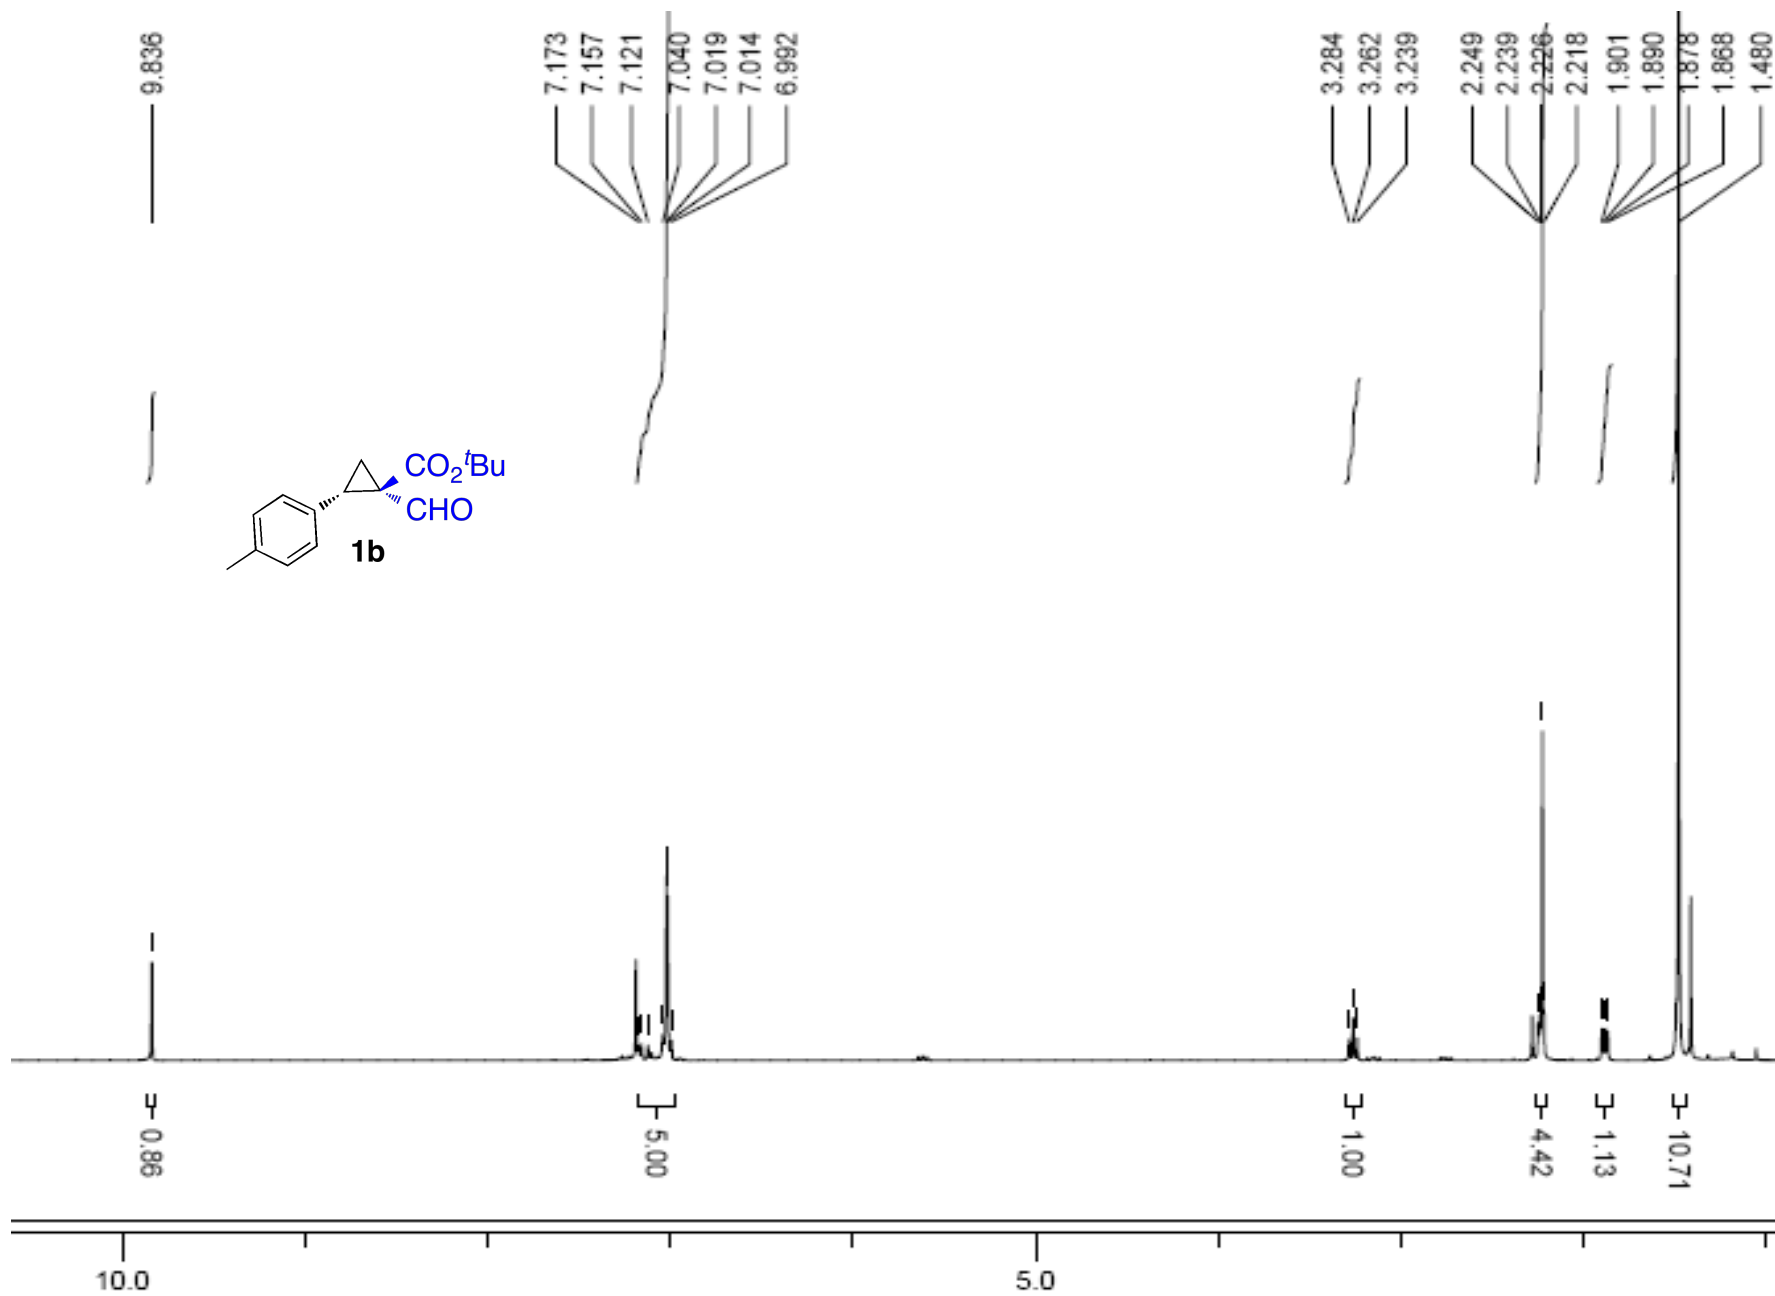

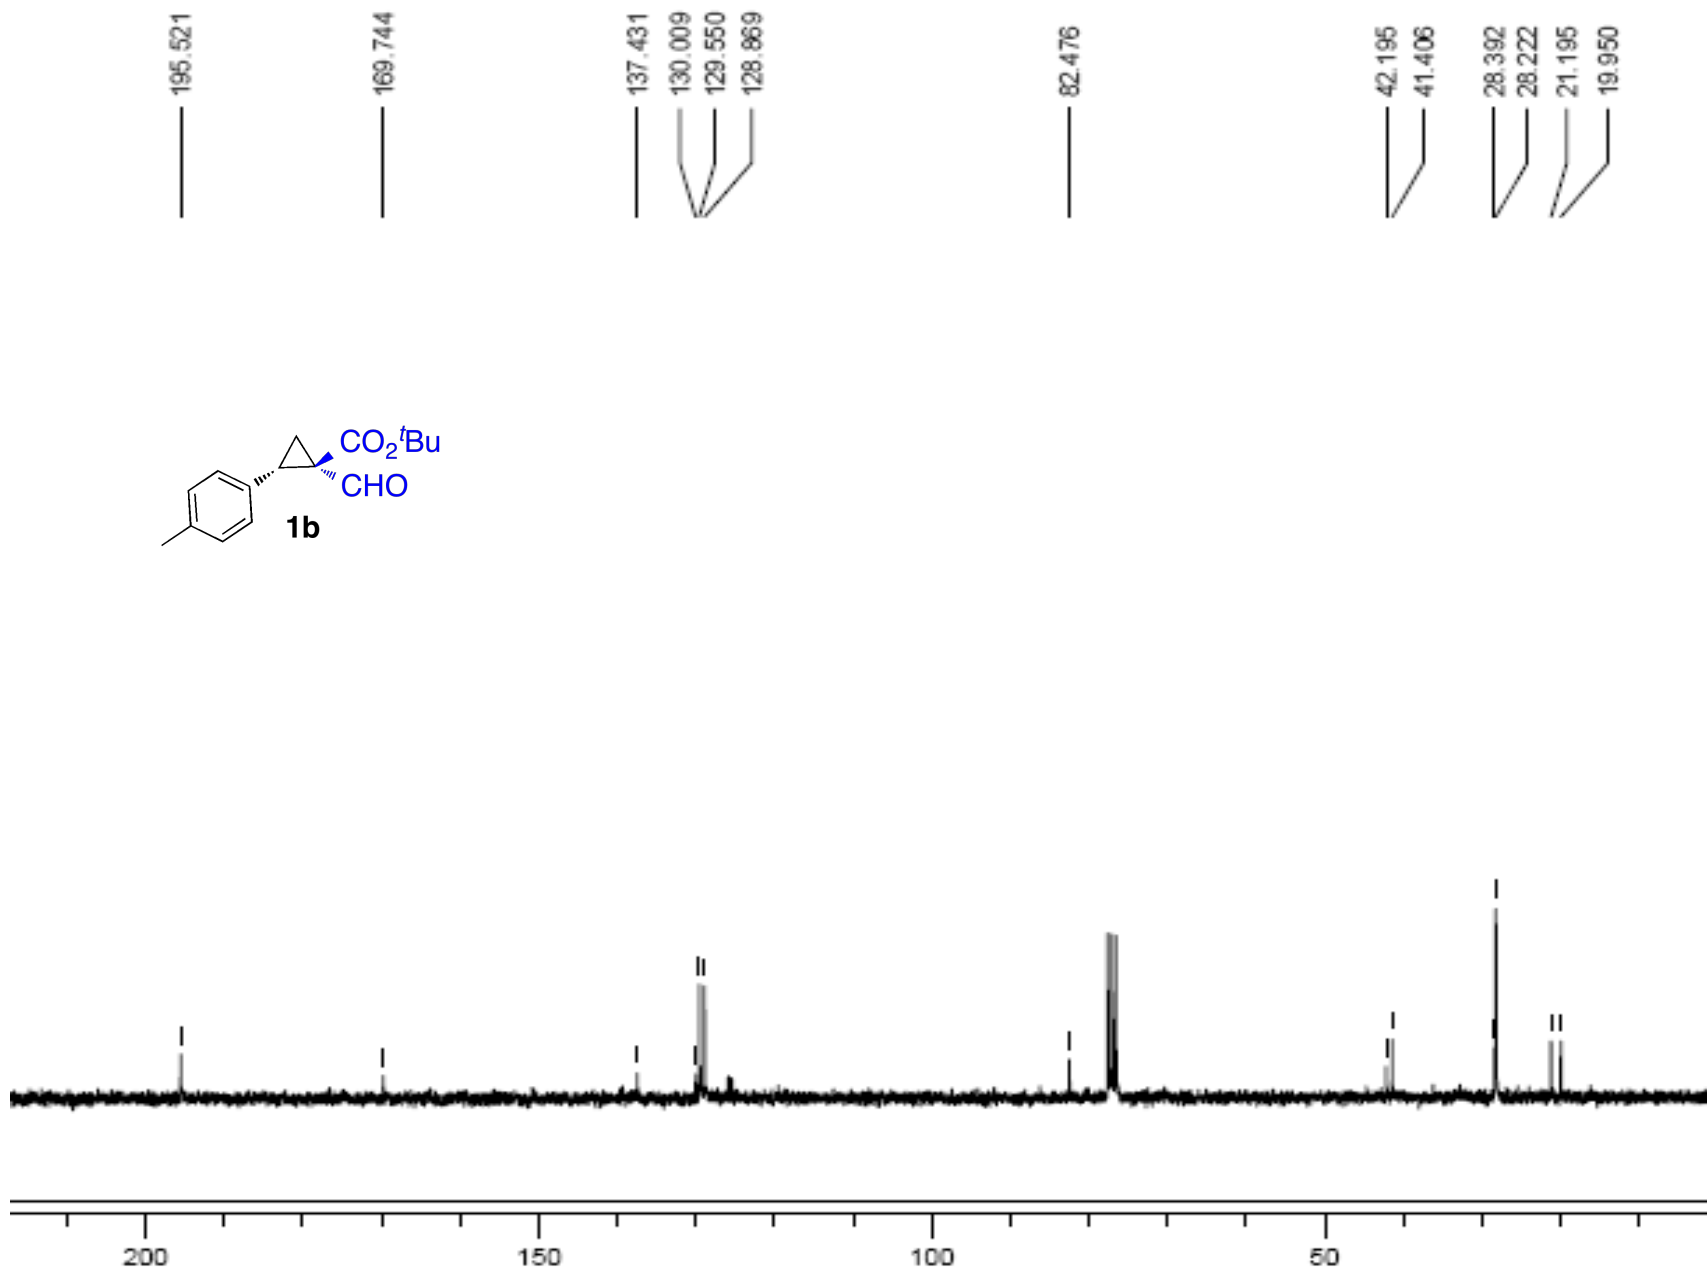

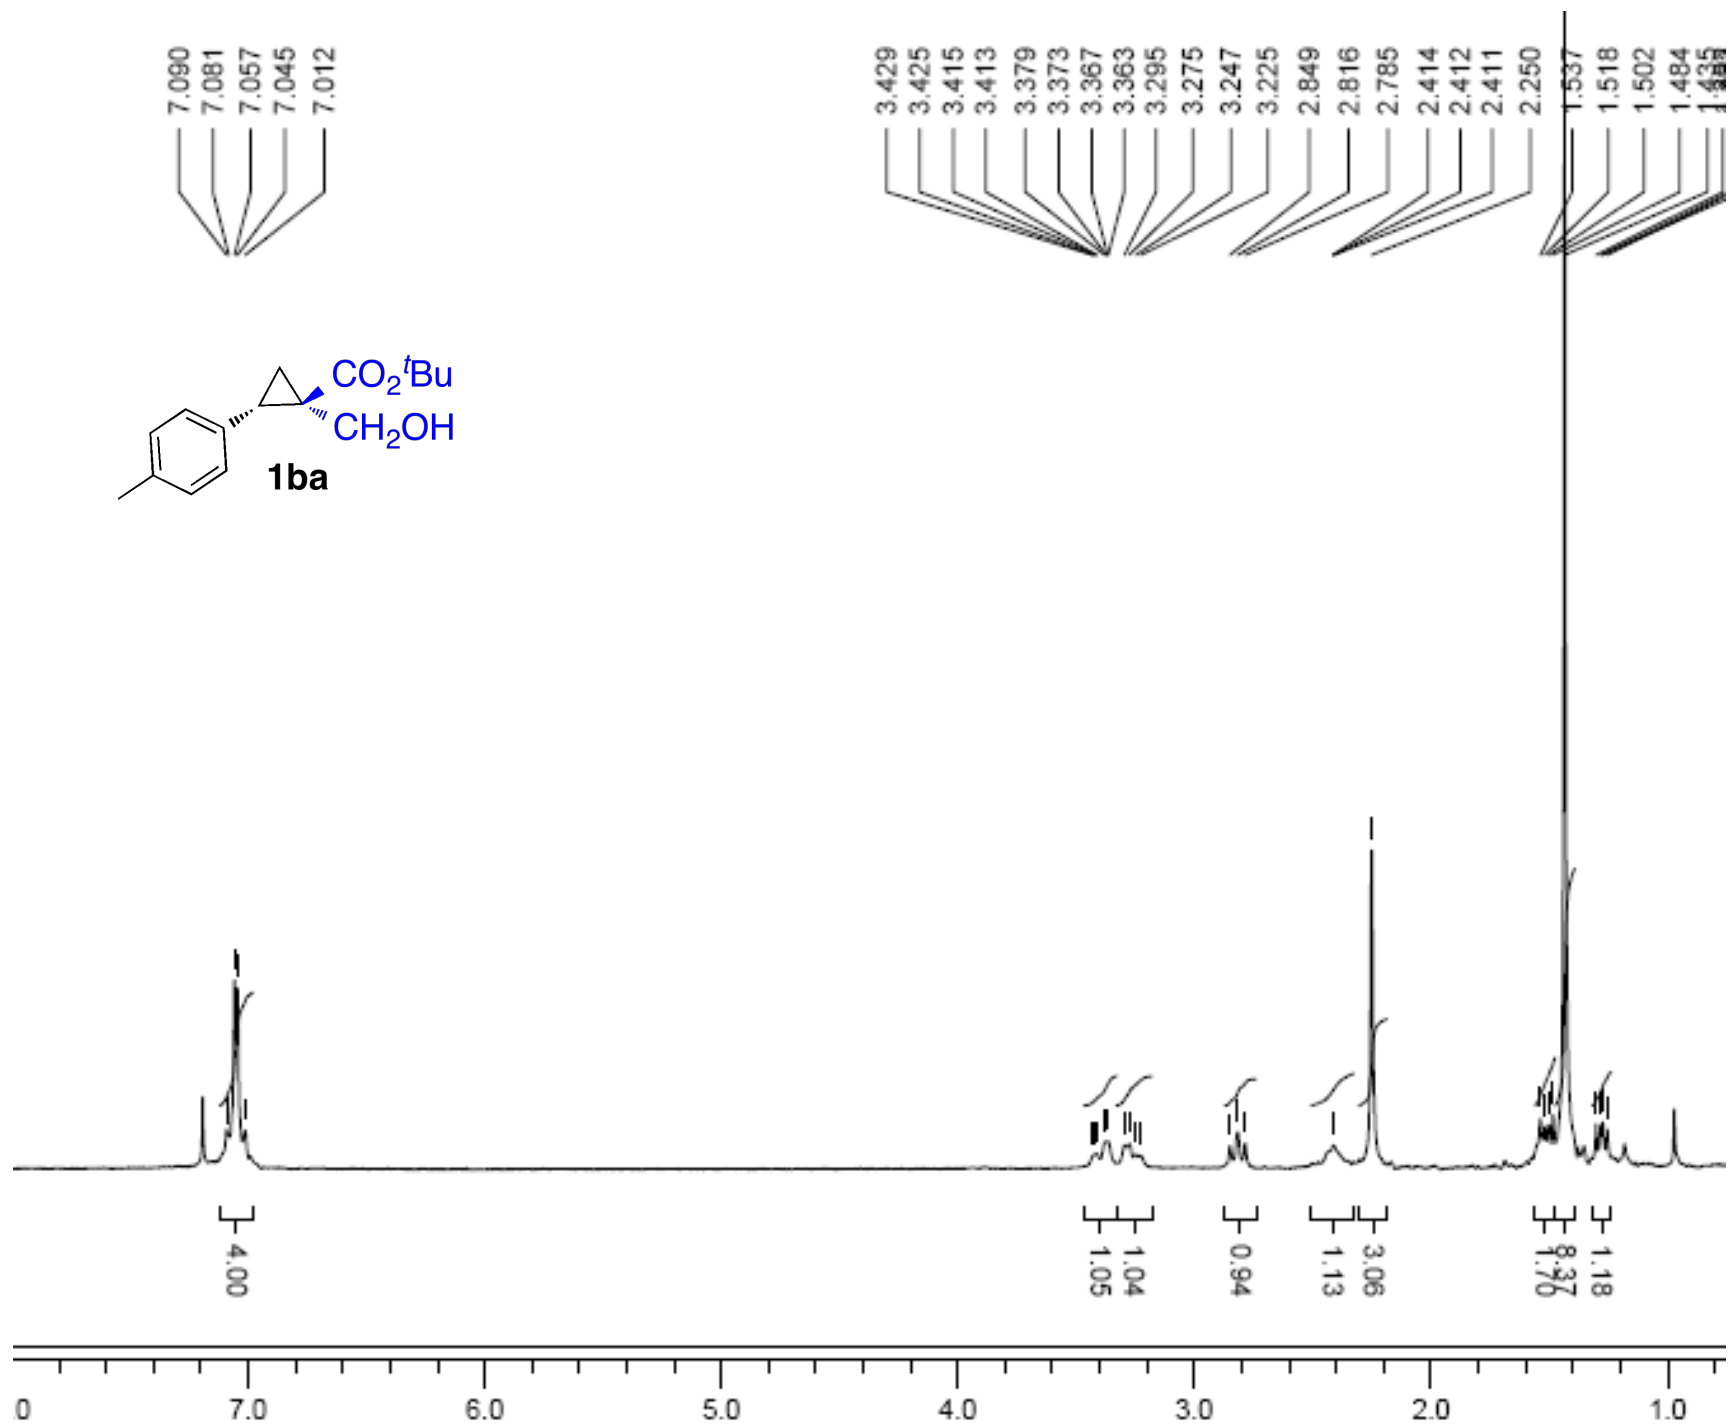

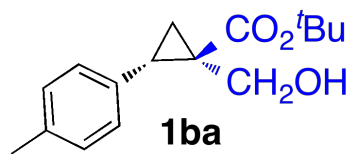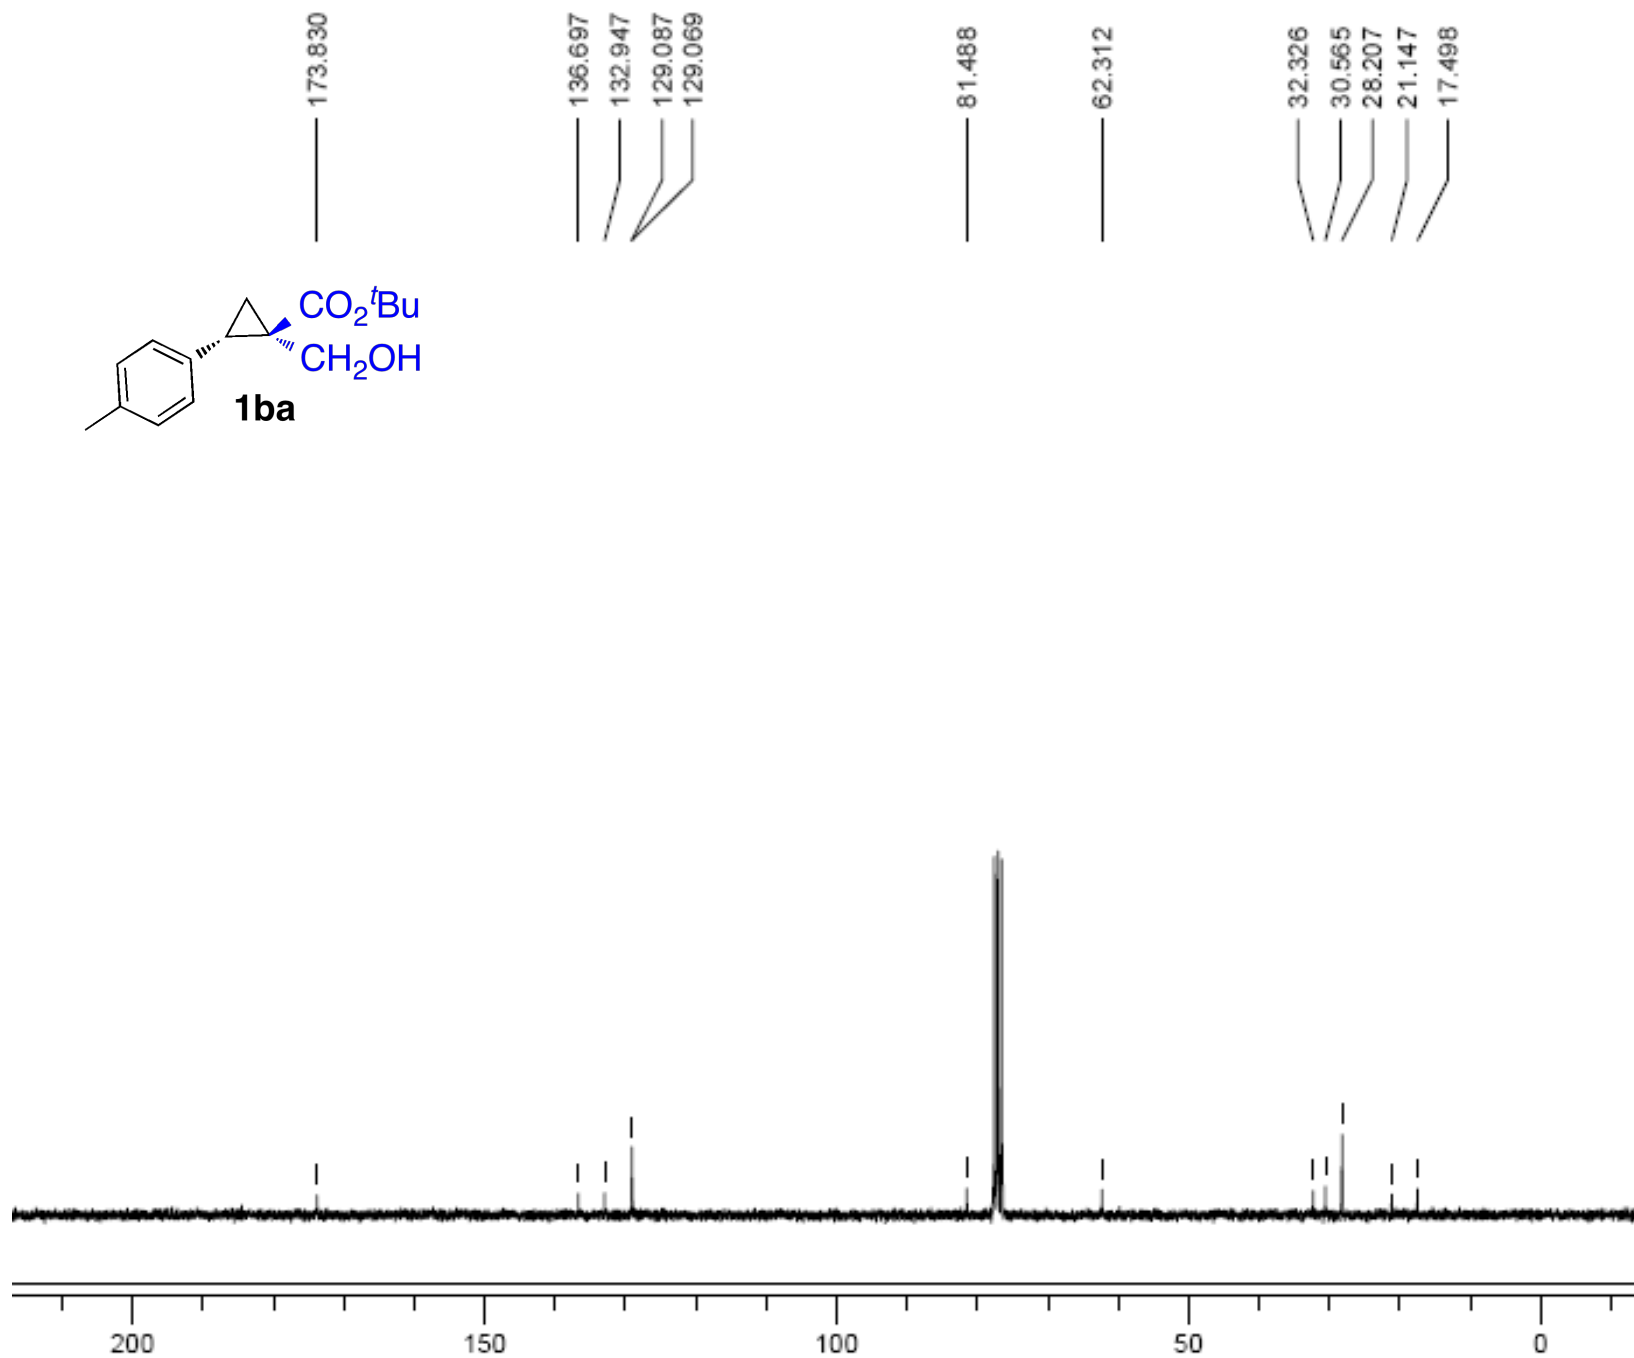

xx-vi-112 whelk 1%@0.8 ml  
 C:\EZStart\Projects\Default\Method\lmj-adh1&.met  
 C:\EZStart\Projects\Default\Data\xx-vi-112 whelk 1%@0.8 ml

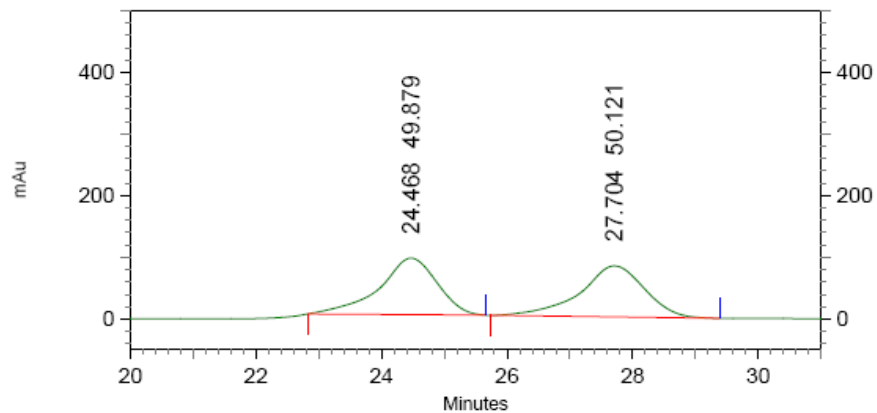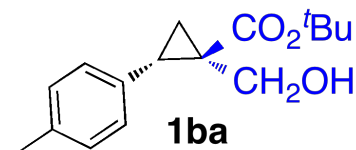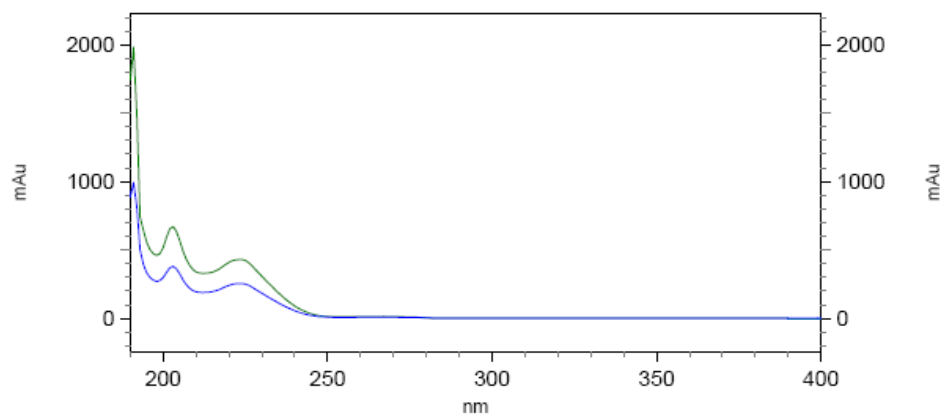

8: 242 nm, 4 nm  
 Results

| Pk #   | Name | Retention Time | Area Percent |
|--------|------|----------------|--------------|
| 1      |      | 24.468         | 49.879       |
| 2      |      | 27.704         | 50.121       |
| Totals |      |                | 100.000      |

xx-vi-113 whelk 1%@0.8 ml  
 C:\EZStart\Projects\Default\Method\lmj-adh1&.met  
 C:\EZStart\Projects\Default\Data\xx-vi-113 whelk 1%@0.8 ml

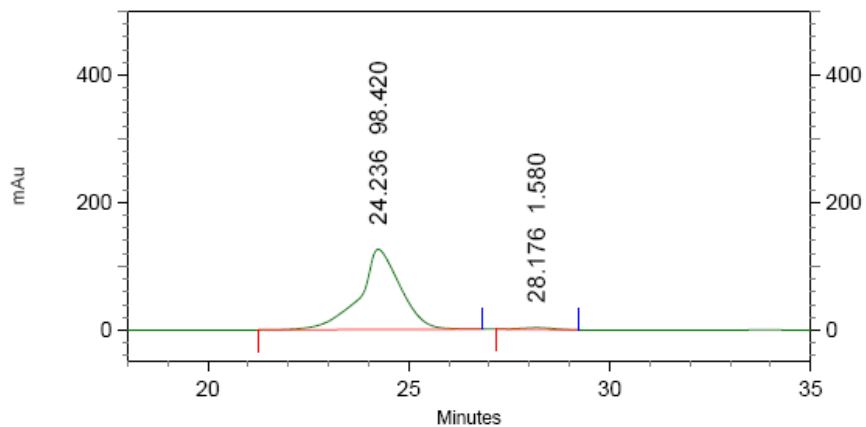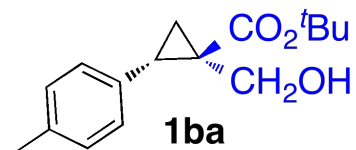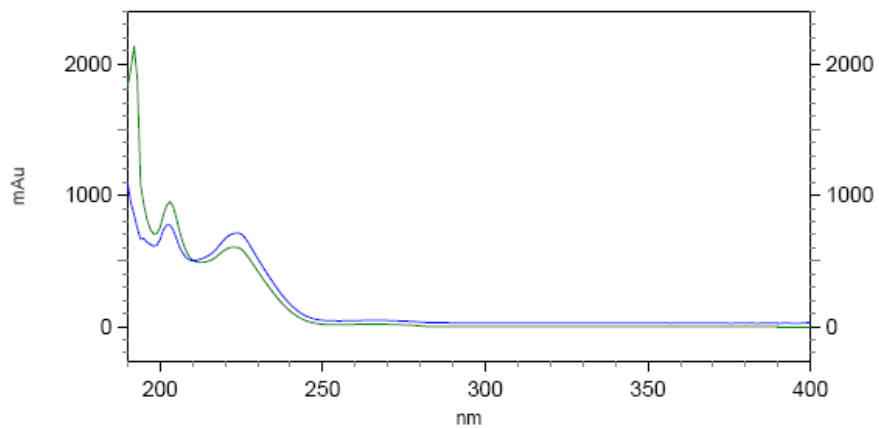

8: 232 nm, 4 nm

Results

| Pk # | Name | Retention Time | Area Percent |
|------|------|----------------|--------------|
| 1    |      | 24.236         | 98.420       |
| 2    |      | 28.176         | 1.580        |

|        |  |  |         |
|--------|--|--|---------|
| Totals |  |  | 100.000 |
|--------|--|--|---------|

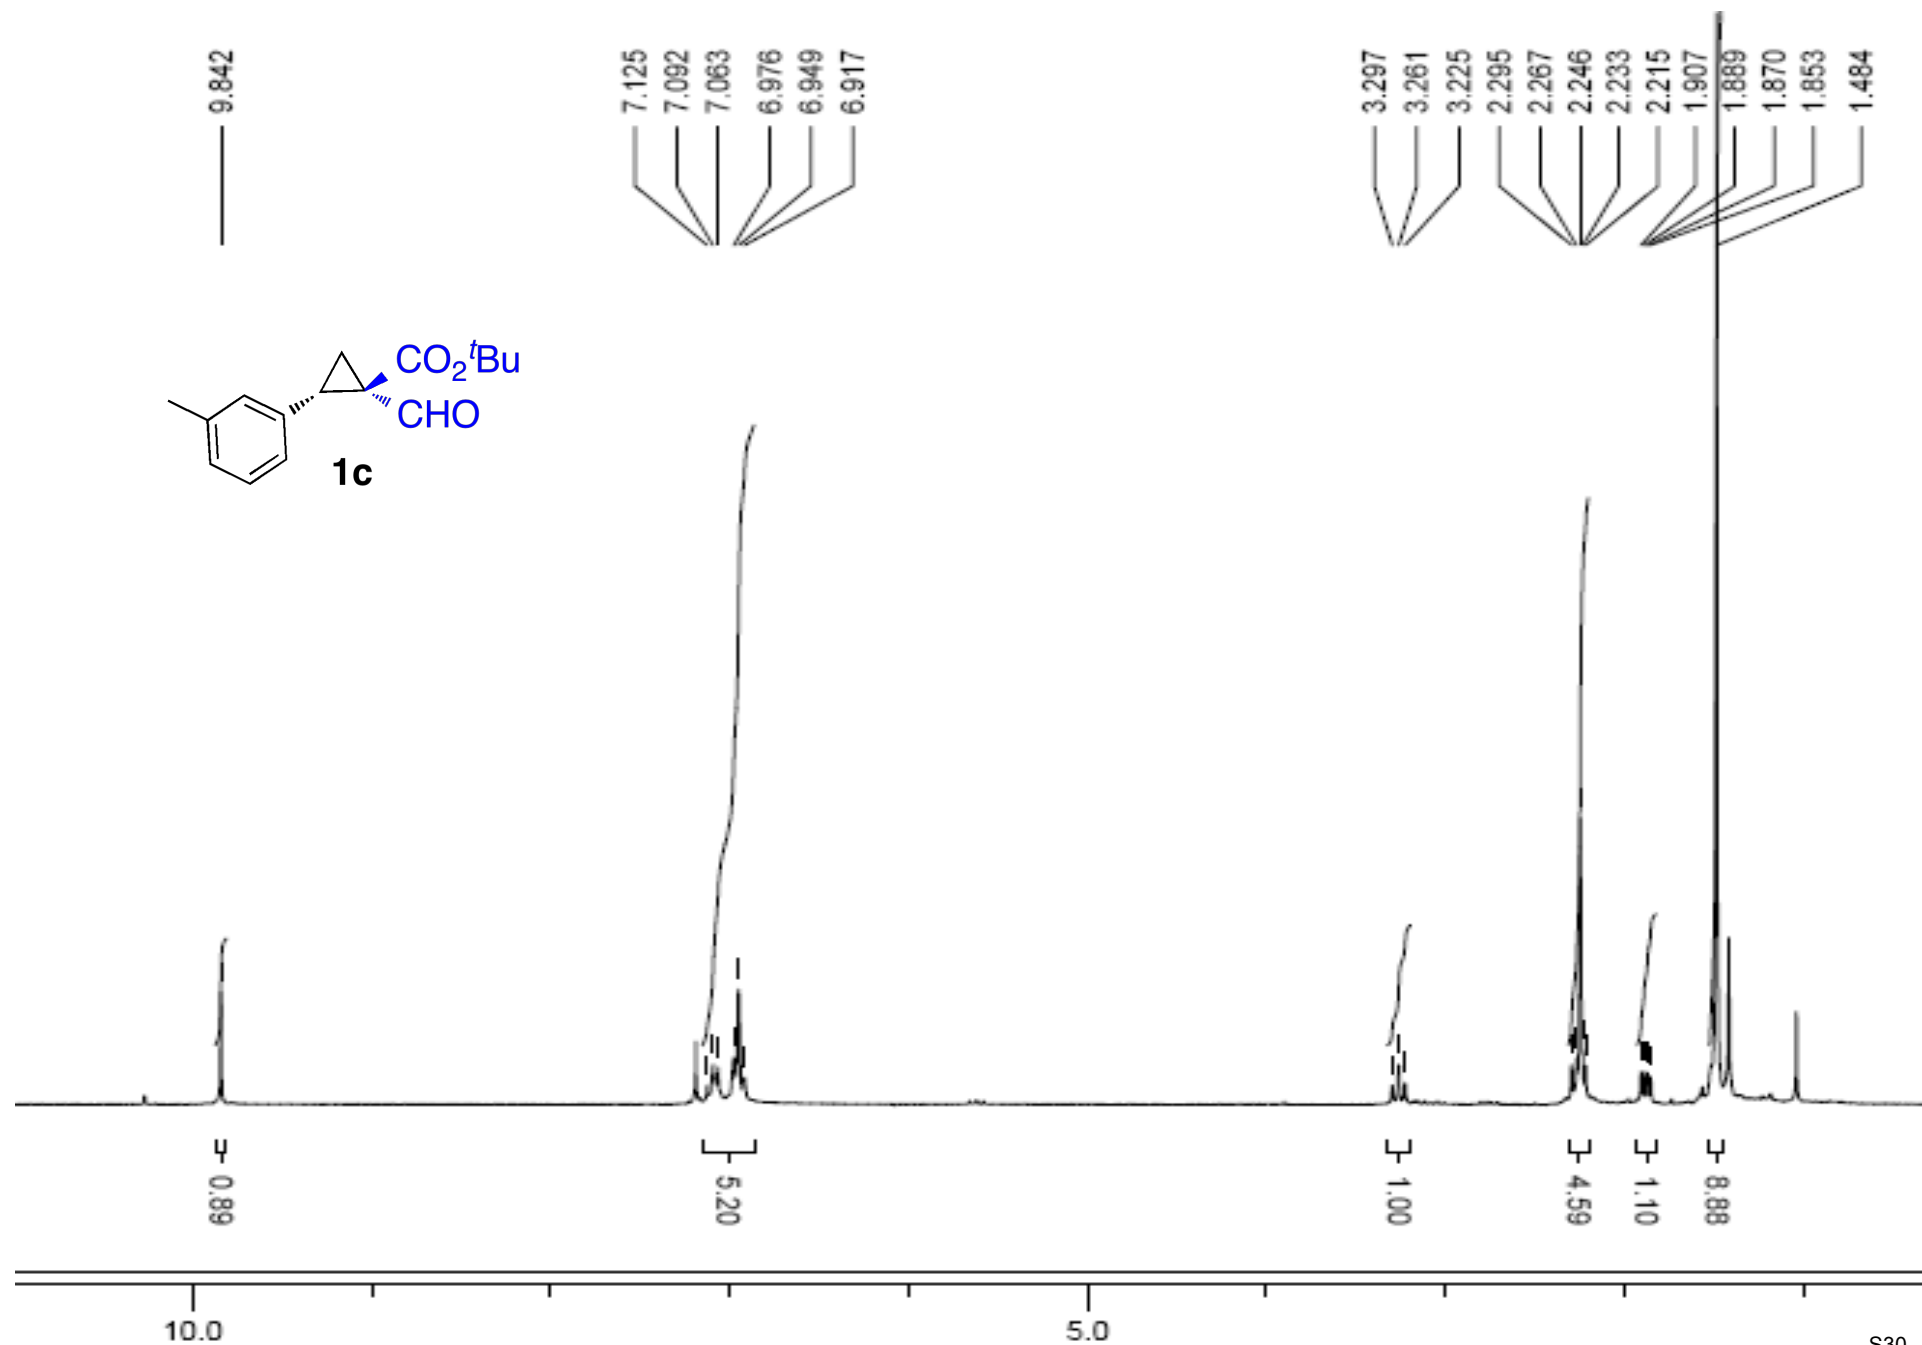

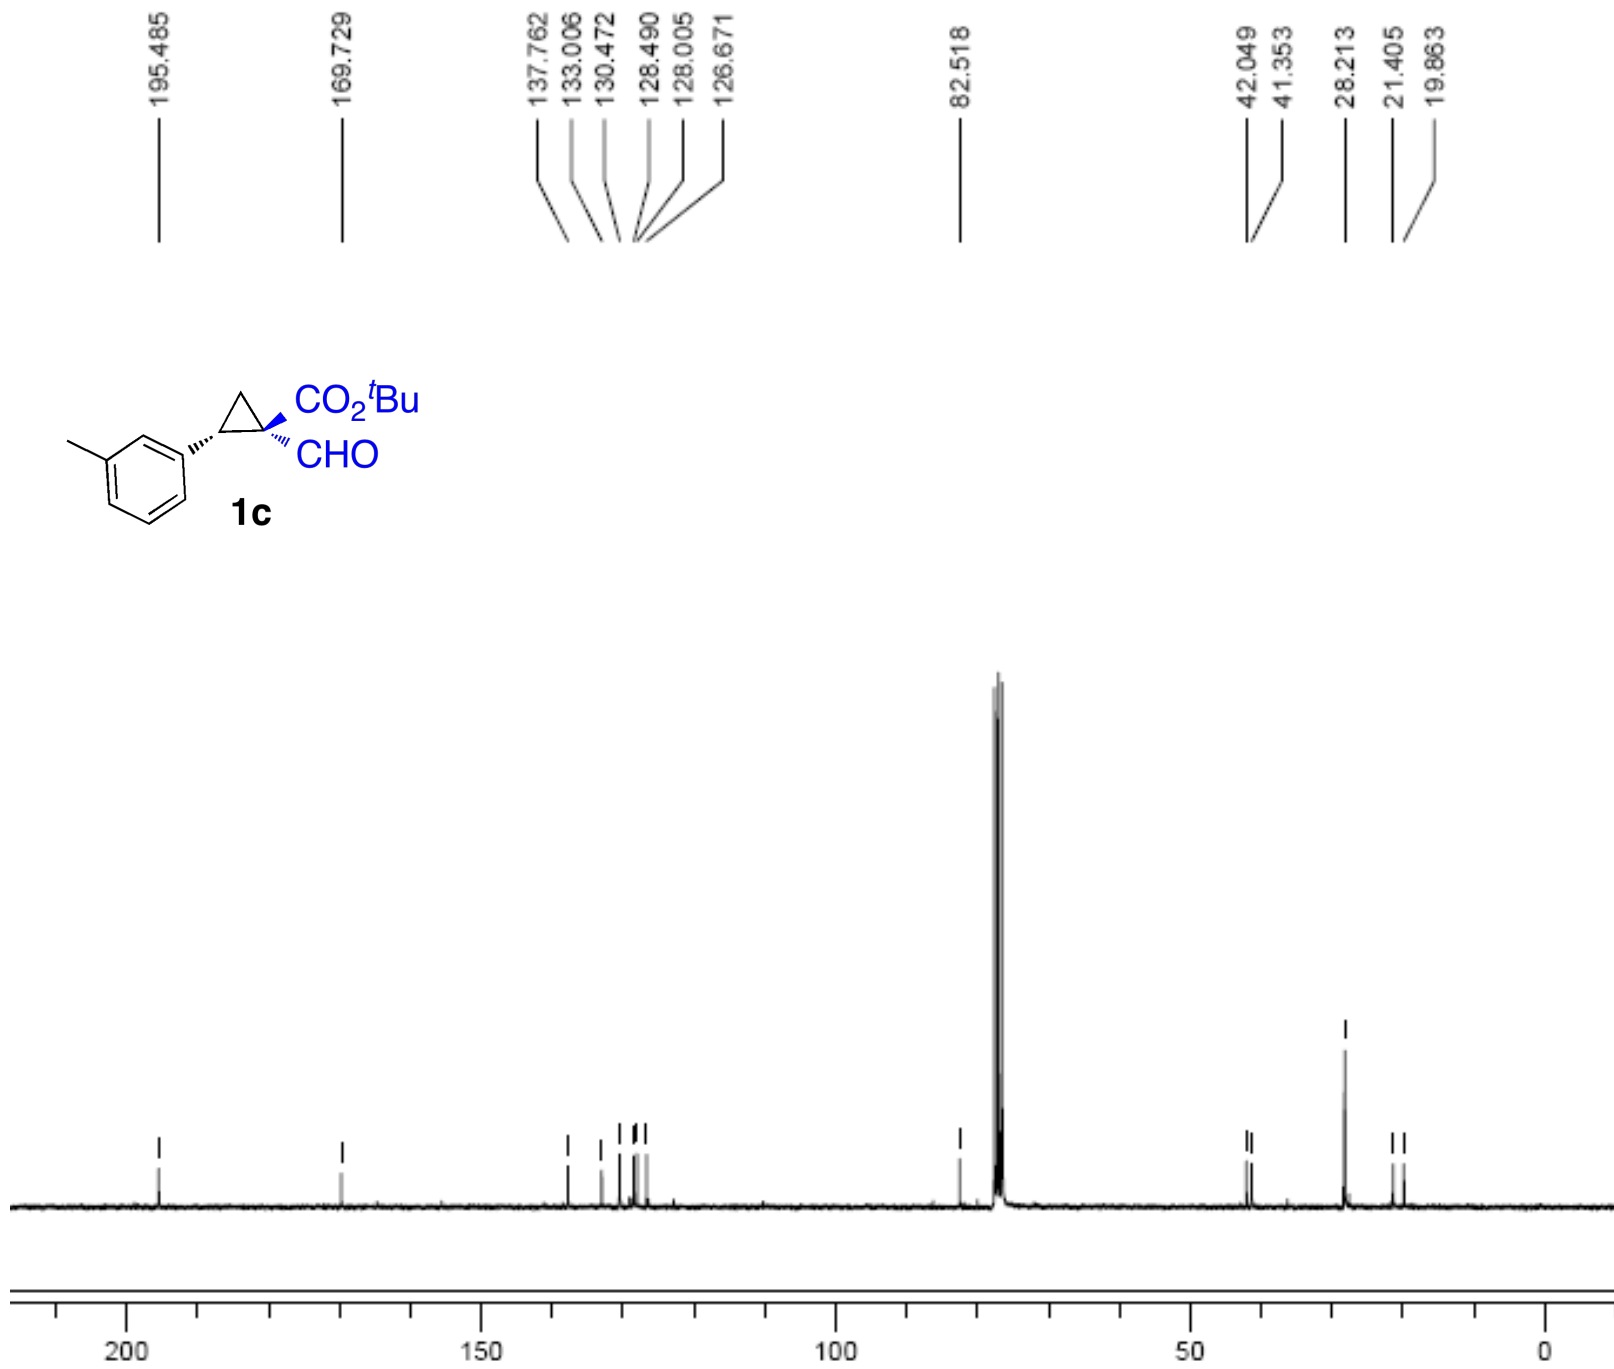



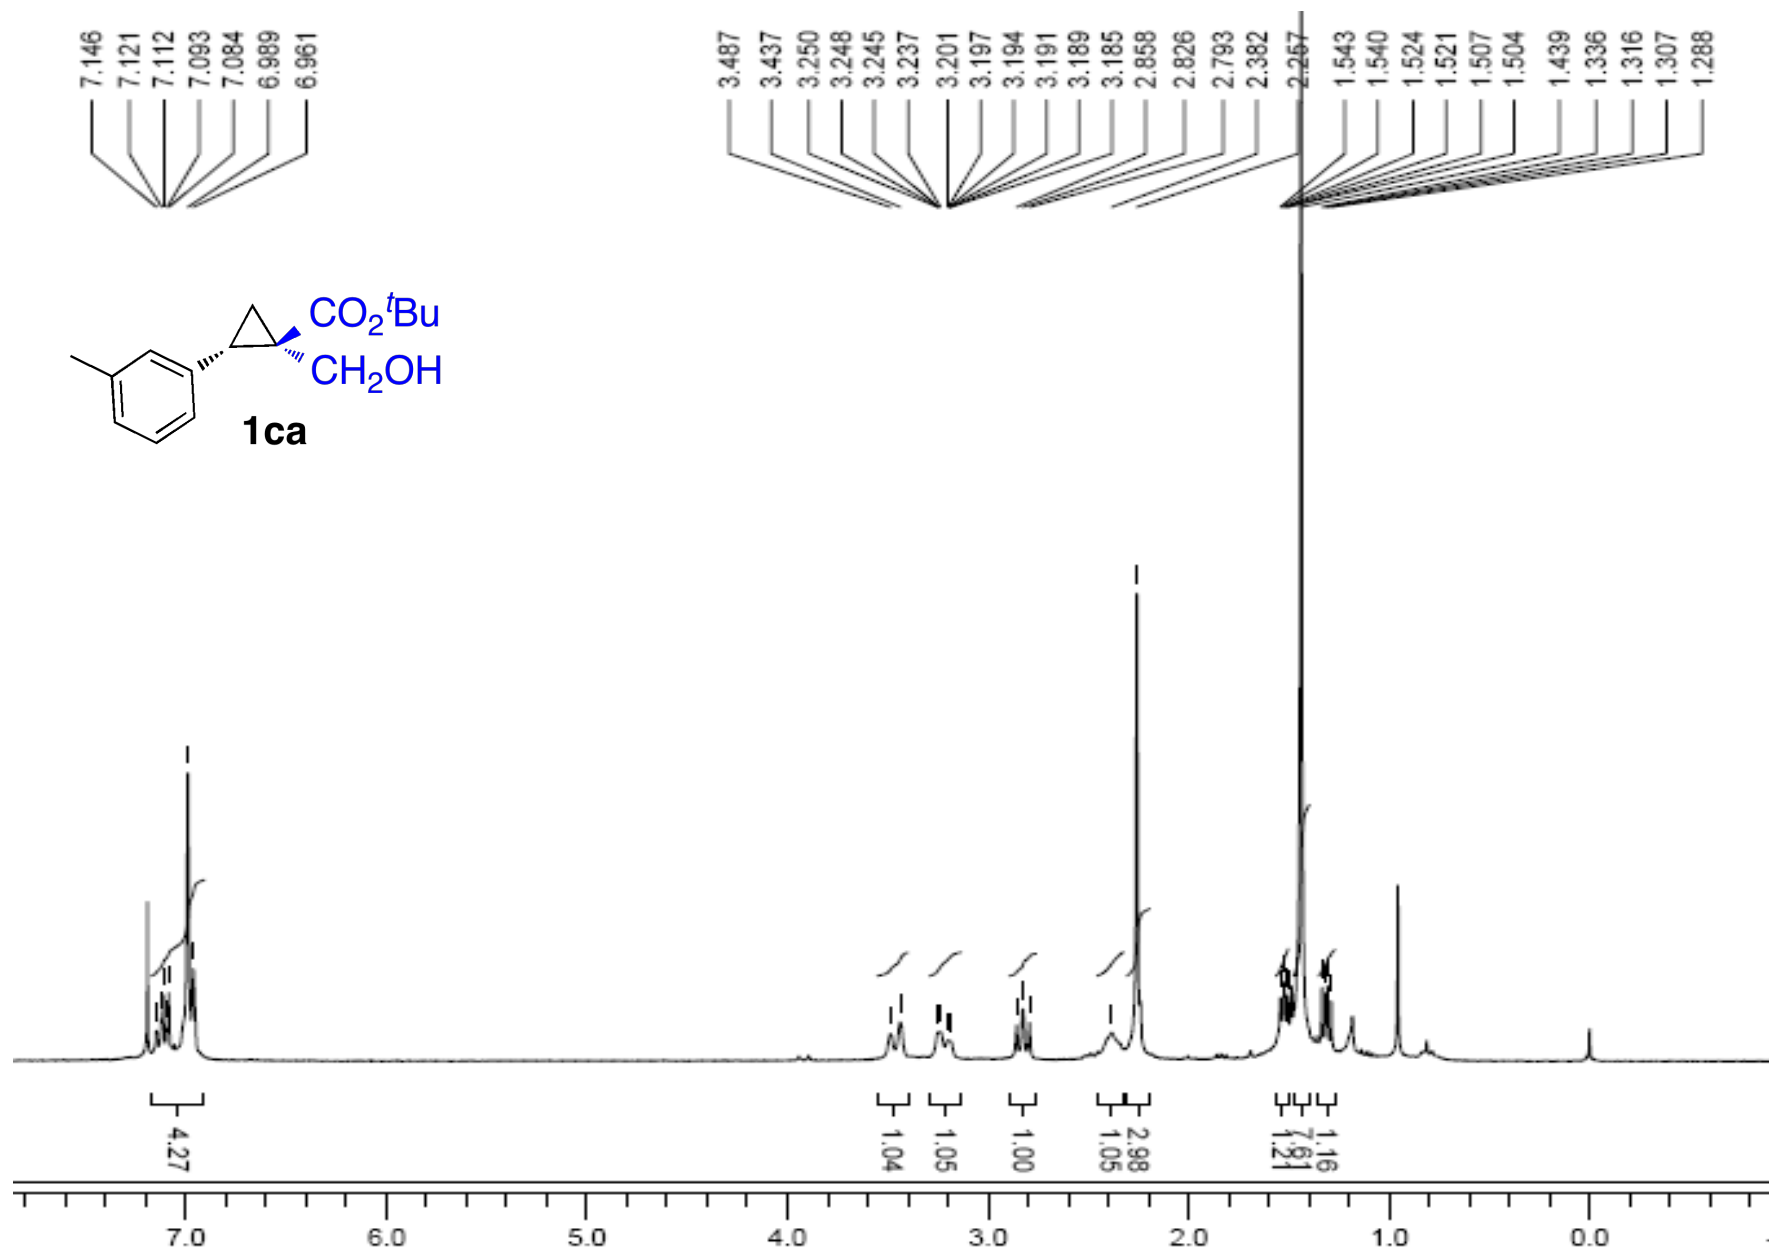

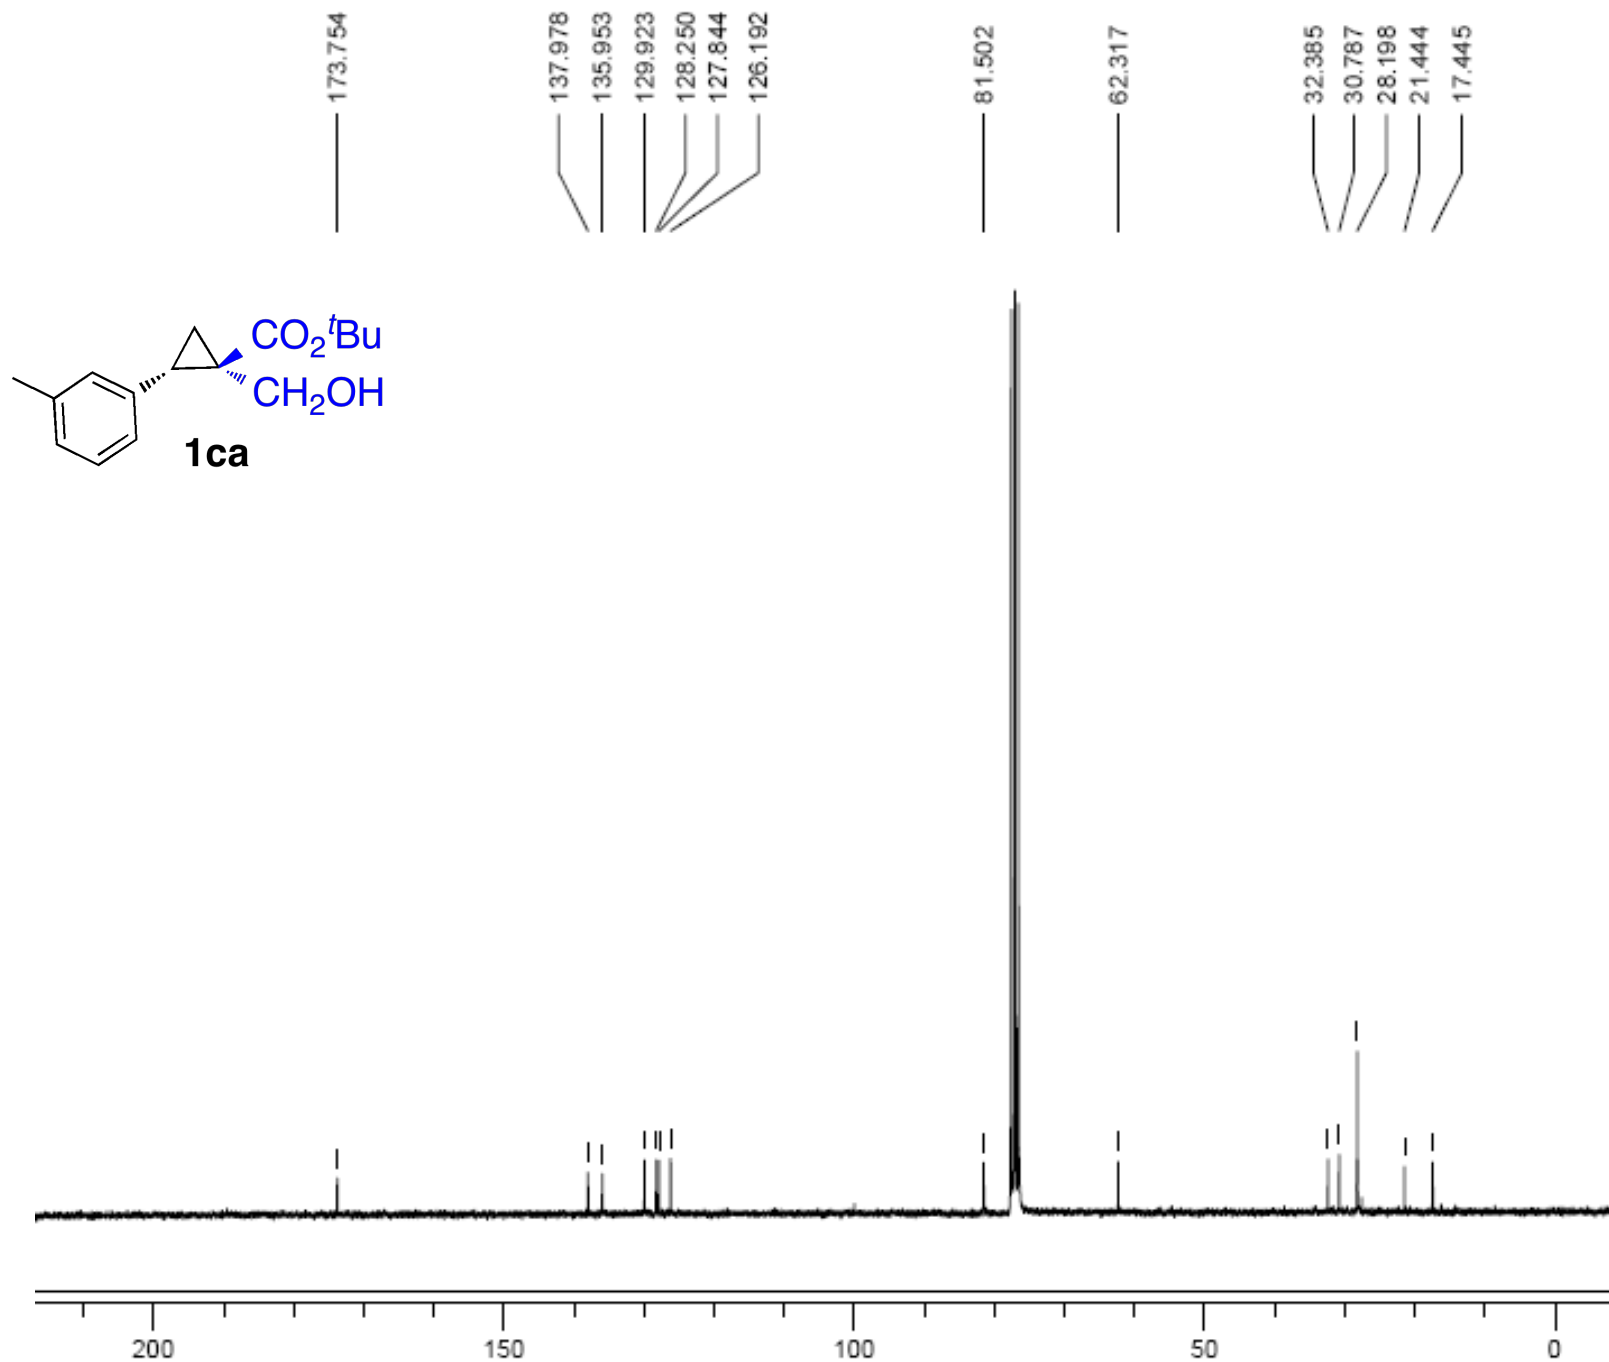

xx-vii-293 ADH 1@0.8 ml  
 C:\EZStart\Projects\Default\Method\Shifa-P-Cyclopropane 1@Whelk.met  
 C:\EZStart\Projects\Default\Data\xx-vii-293 ADH 1@0.8 ml

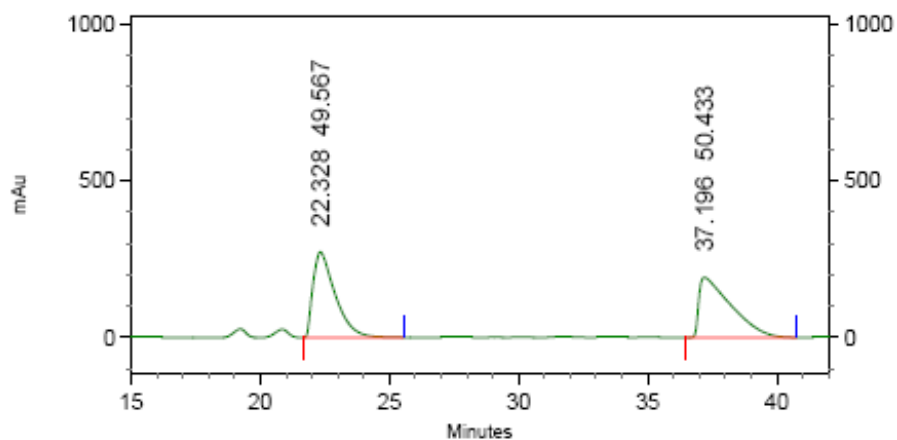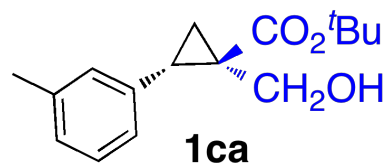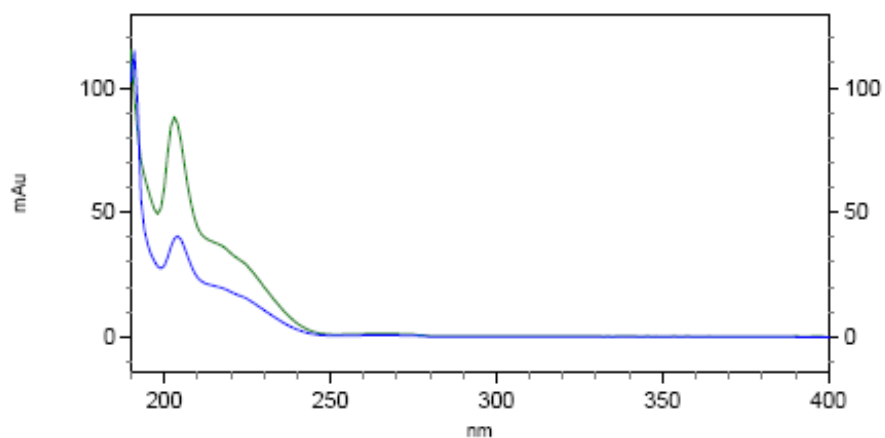

2: 225 nm, 4 nm

Results

| Pk # | Name | Retention Time | Area Percent |
|------|------|----------------|--------------|
| 1    |      | 22.328         | 49.567       |
| 2    |      | 37.196         | 50.433       |

|        |  |  |         |
|--------|--|--|---------|
| Totals |  |  | 100.000 |
|--------|--|--|---------|

xx-vi-121 ADH 1%@0.8 ml

C:\EZStart\Projects\Default\Method\Shifa-P-Cyclopropane 1%Whelk.met

C:\EZStart\Projects\Default\Data\xx-vi-122 ADH 1%@0.8 ml

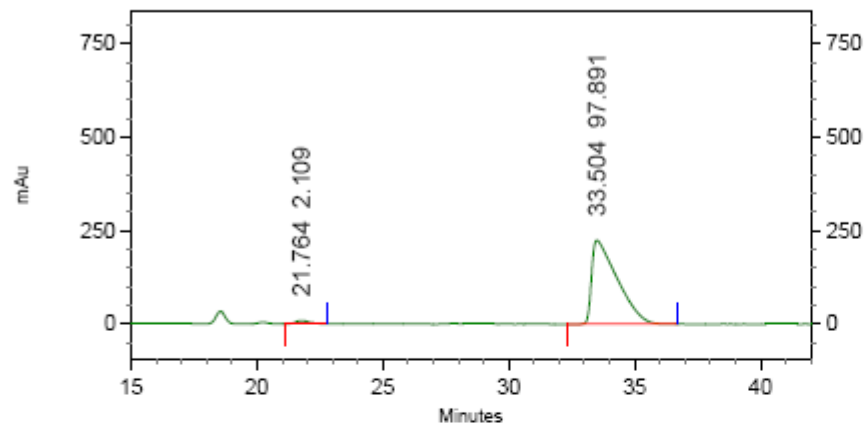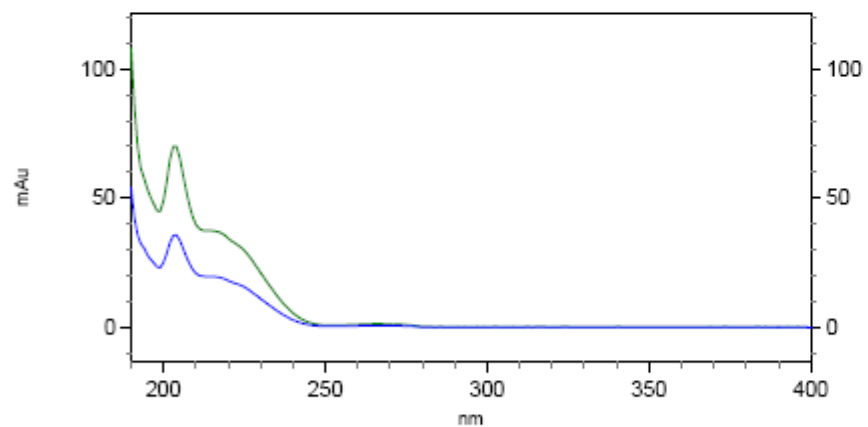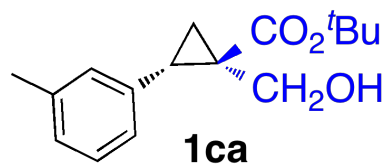

2: 225 nm, 4 nm

Results

| Pk # | Name | Retention Time | Area Percent |
|------|------|----------------|--------------|
| 1    |      | 21.764         | 2.109        |
| 2    |      | 33.504         | 97.891       |

|        |         |
|--------|---------|
| Totals | 100.000 |
|--------|---------|

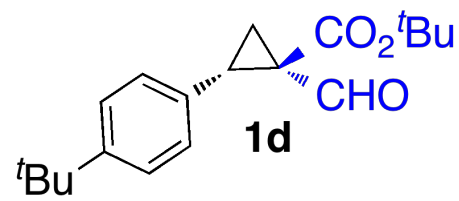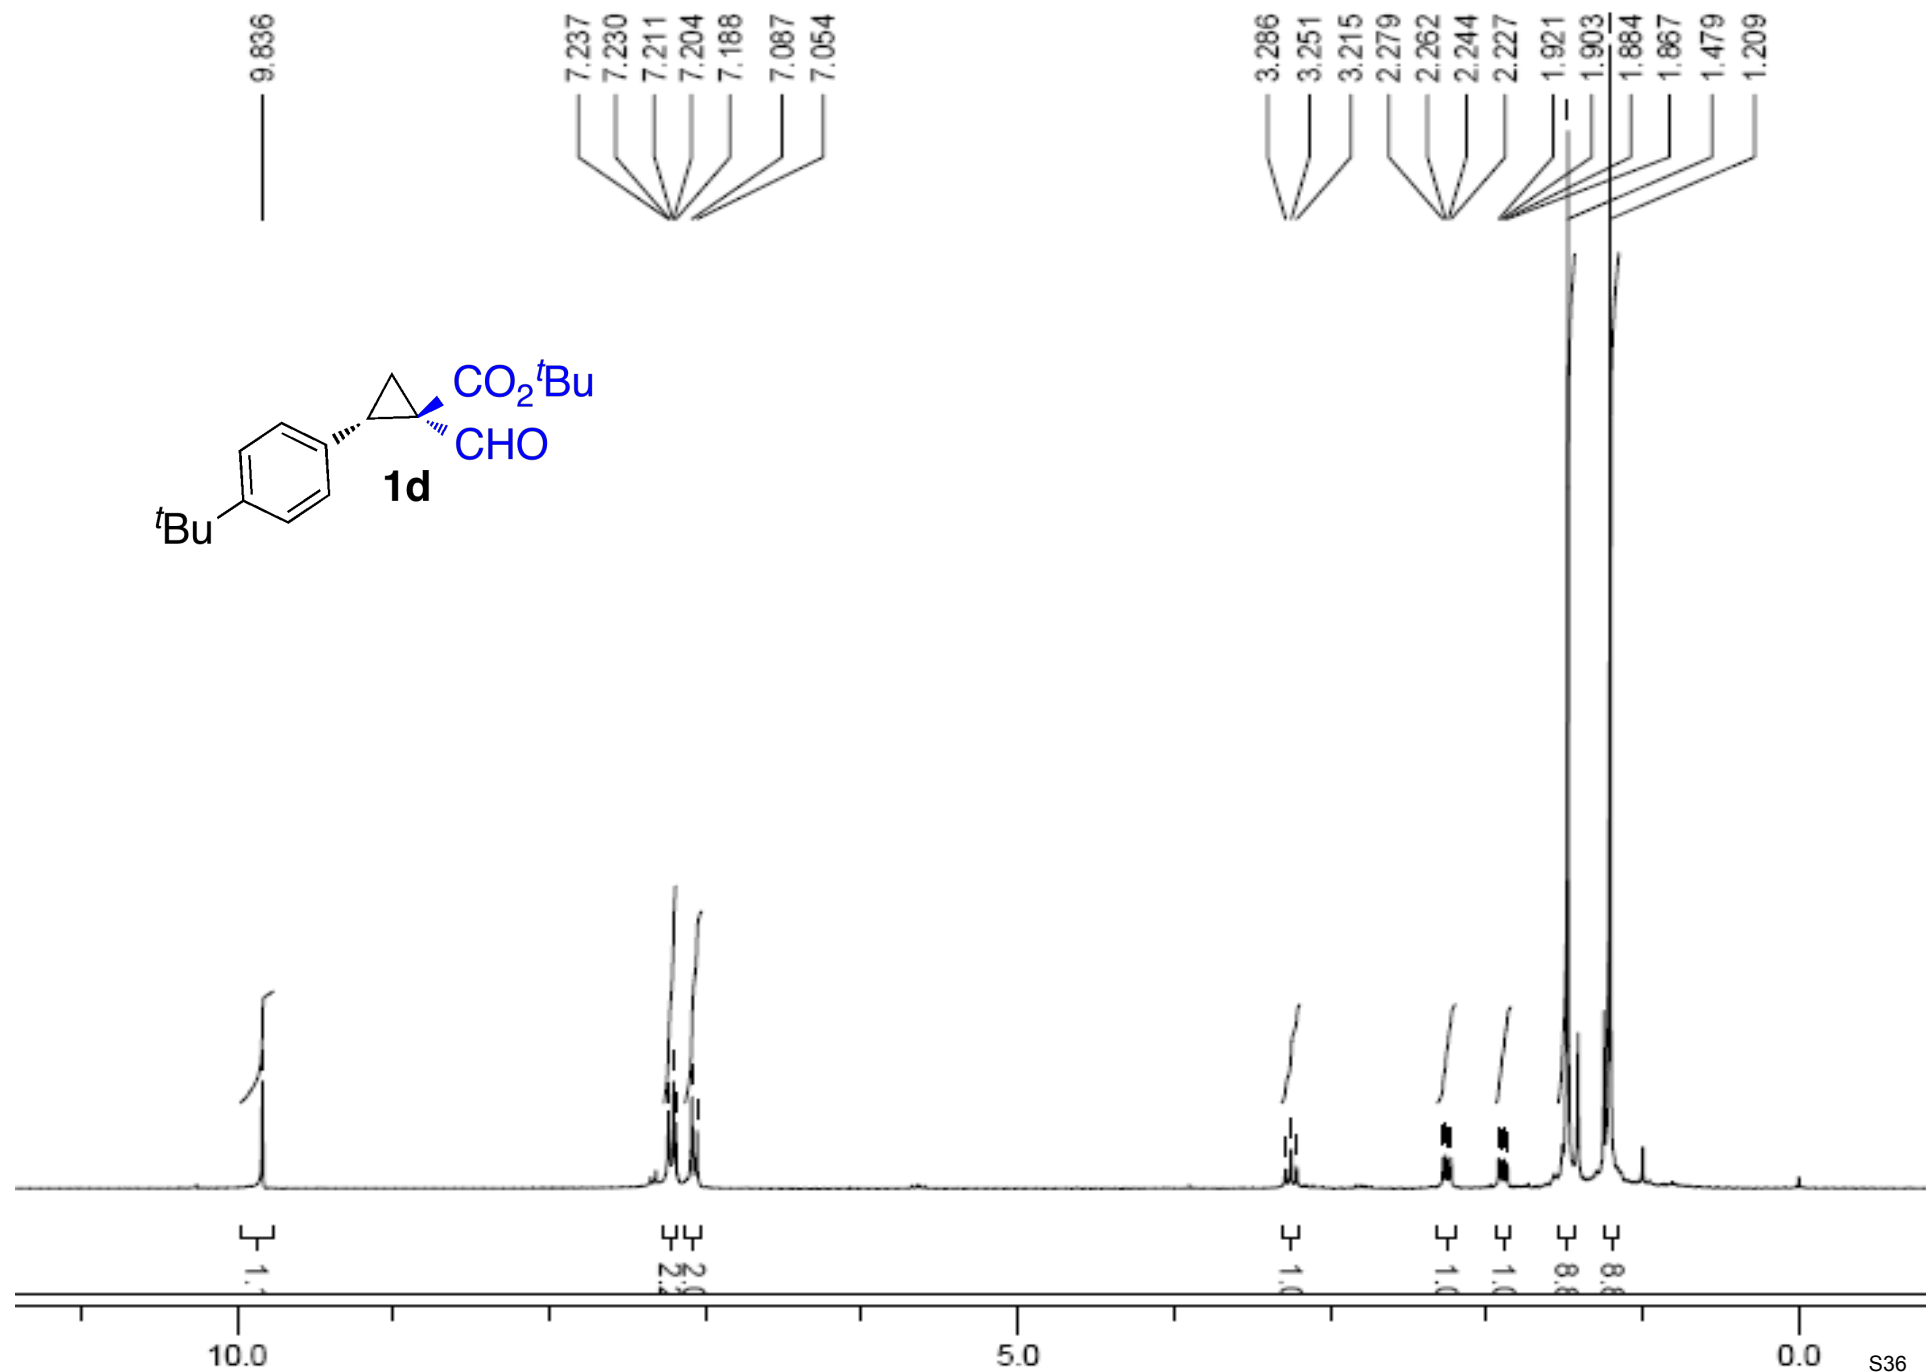

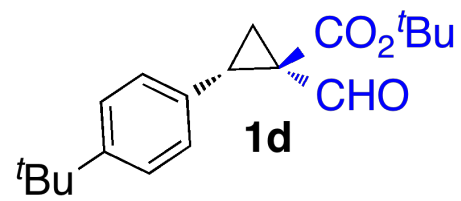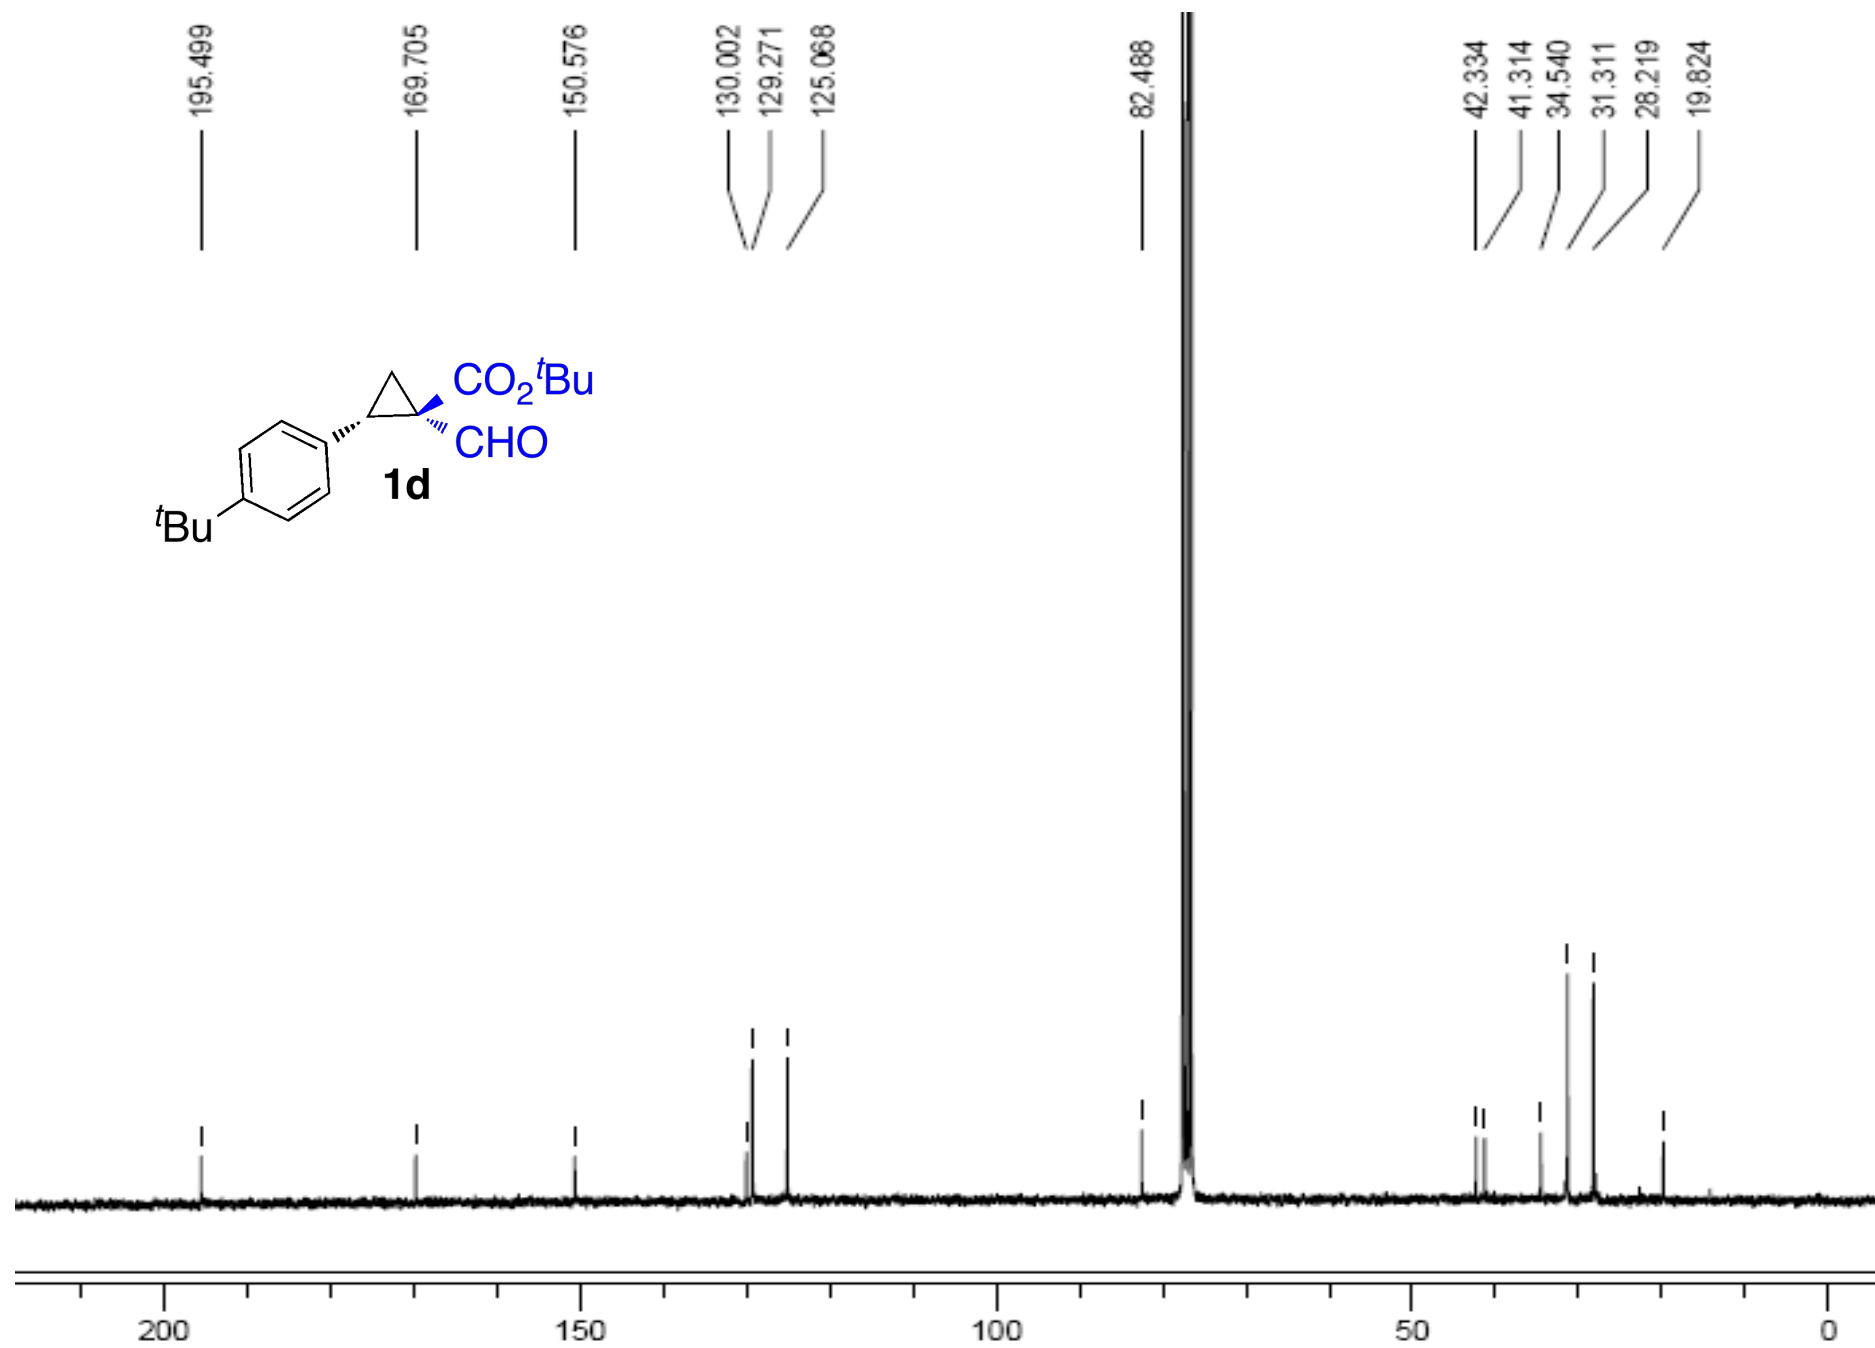

xx-vi-121SD whelk 1%@0.8 ml  
 C:\EZStart\Projects\Default\Method\Shifa-EDA.met  
 E:\HPLC\xx-vi-121SD whelk 1%@0.8 ml

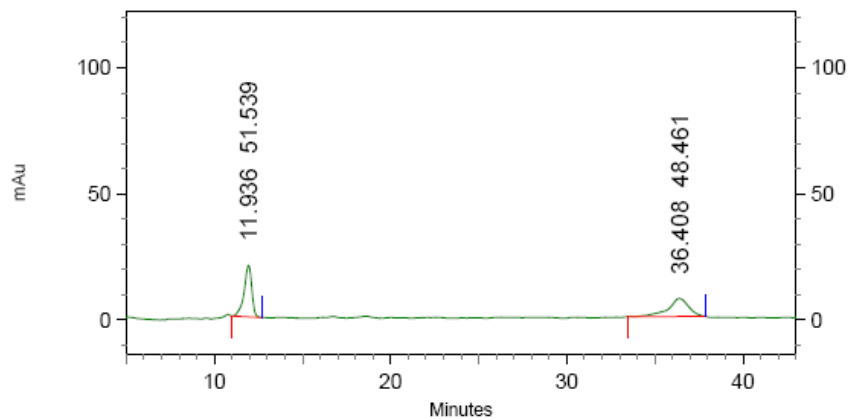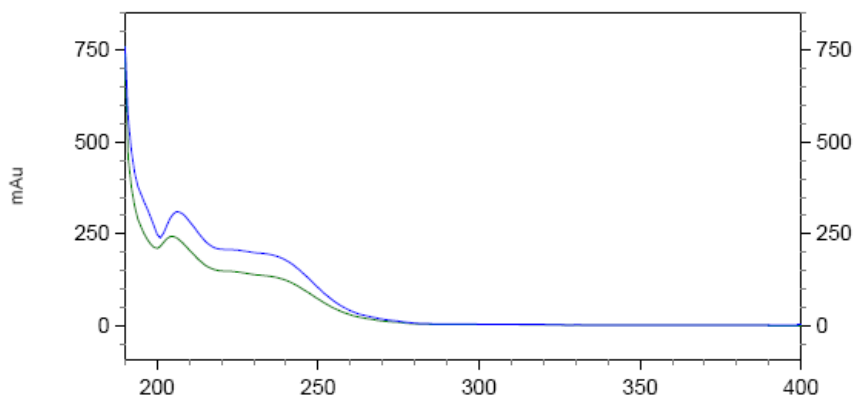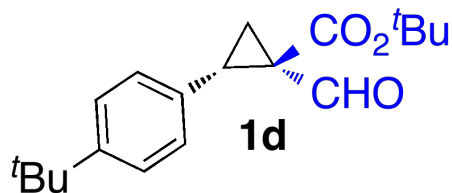

1: 224 nm, 4 nm  
 Results

| Pk #   | Name | Retention Time | Area Percent |
|--------|------|----------------|--------------|
| 1      |      | 11.936         | 51.539       |
| 2      |      | 36.408         | 48.461       |
| Totals |      |                | 100.000      |

xx-vi-120SD whelk 1%@0.8 ml  
 C:\EZStart\Projects\Default\Method\Shifa-EDA.met  
 C:\EZStart\Projects\Default\Data\xx-vi-120SD whelk 1%@0.8 ml

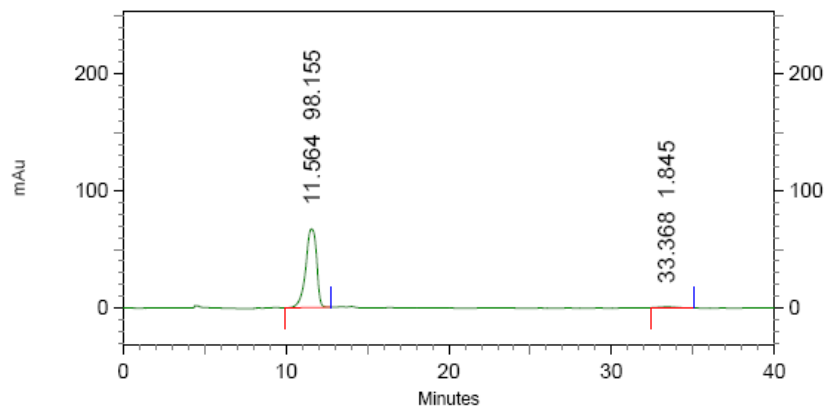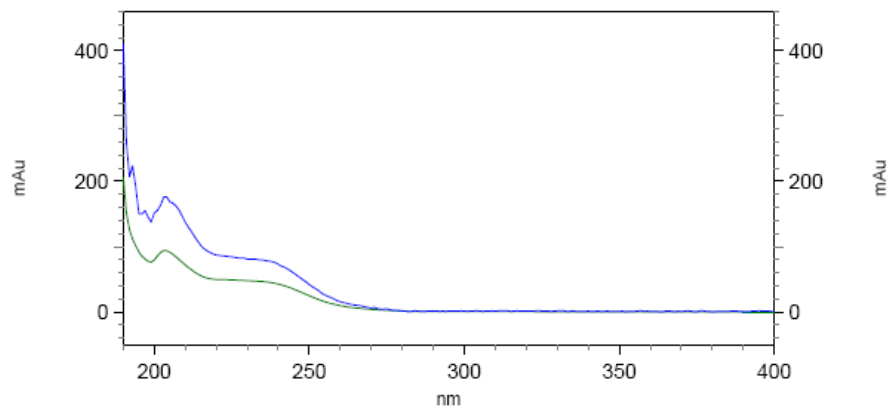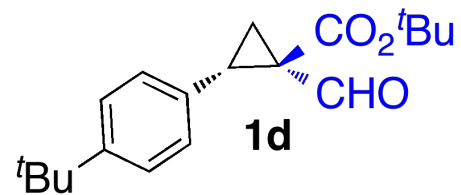

2: 250 nm, 4 nm  
 Results

| Pk #   | Name | Retention Time | Area Percent |
|--------|------|----------------|--------------|
| 1      |      | 11.564         | 98.155       |
| 2      |      | 33.368         | 1.845        |
| Totals |      |                | 100.000      |



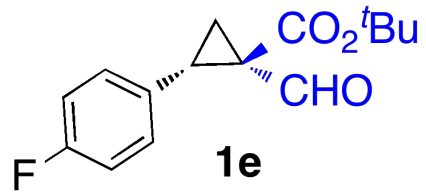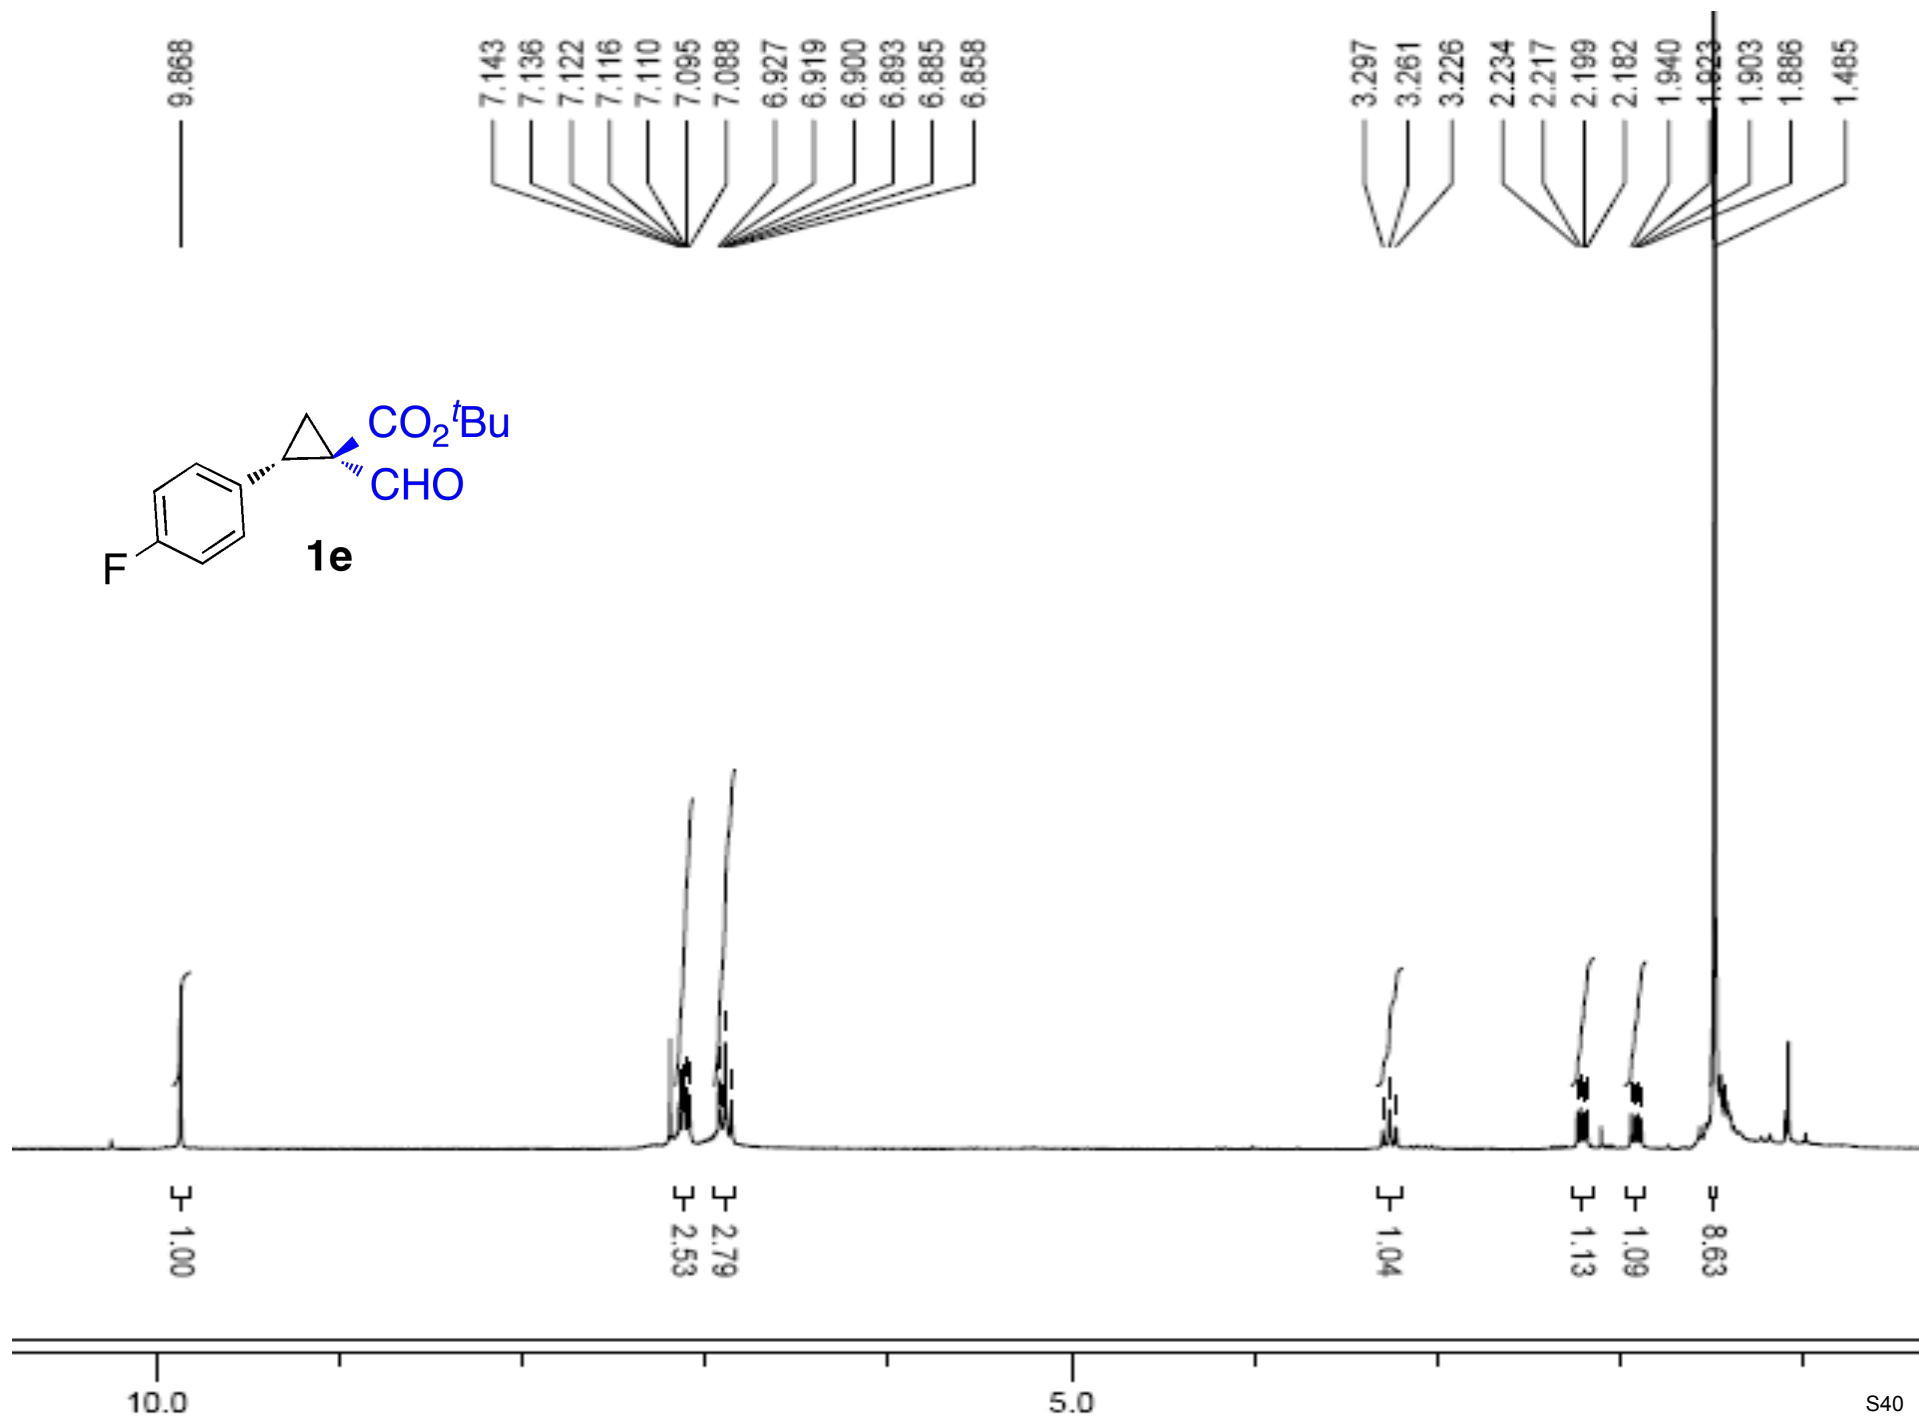

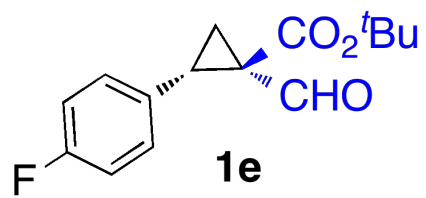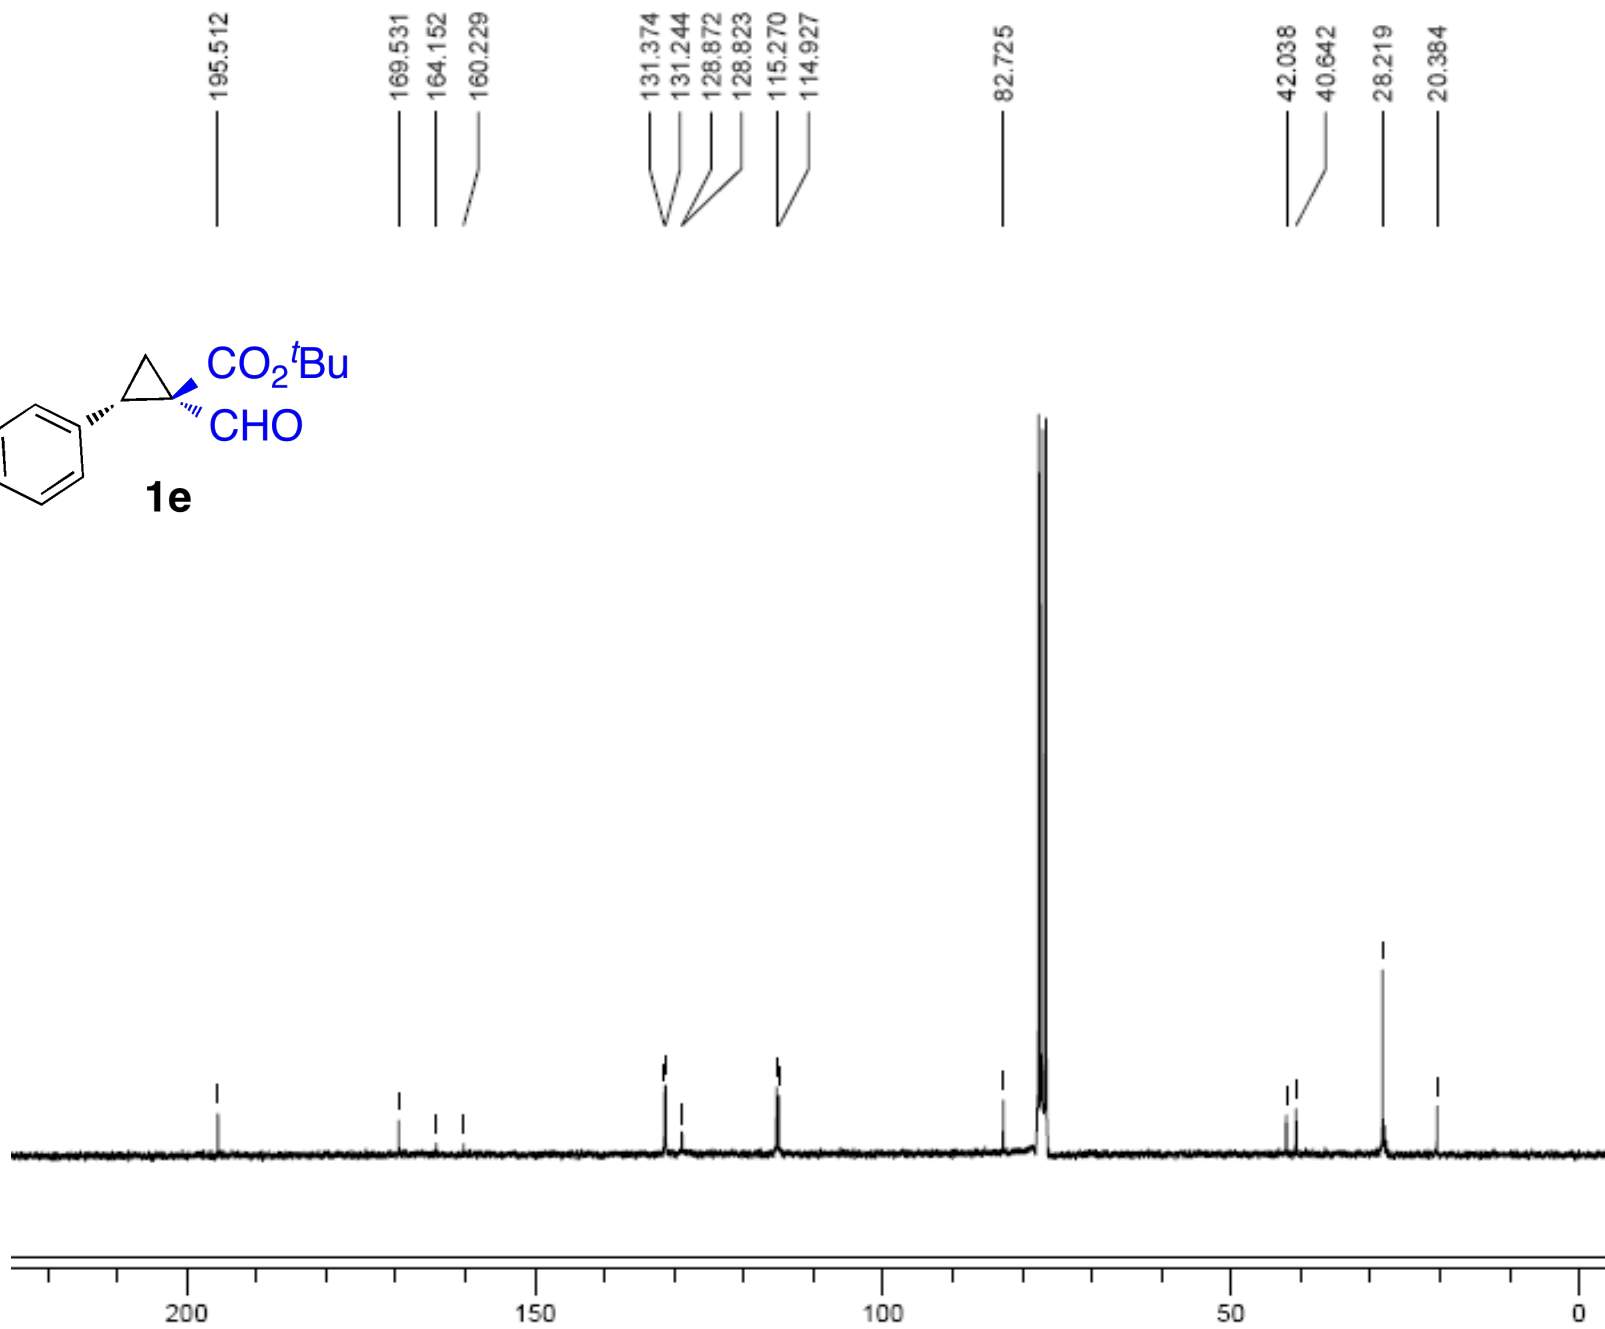

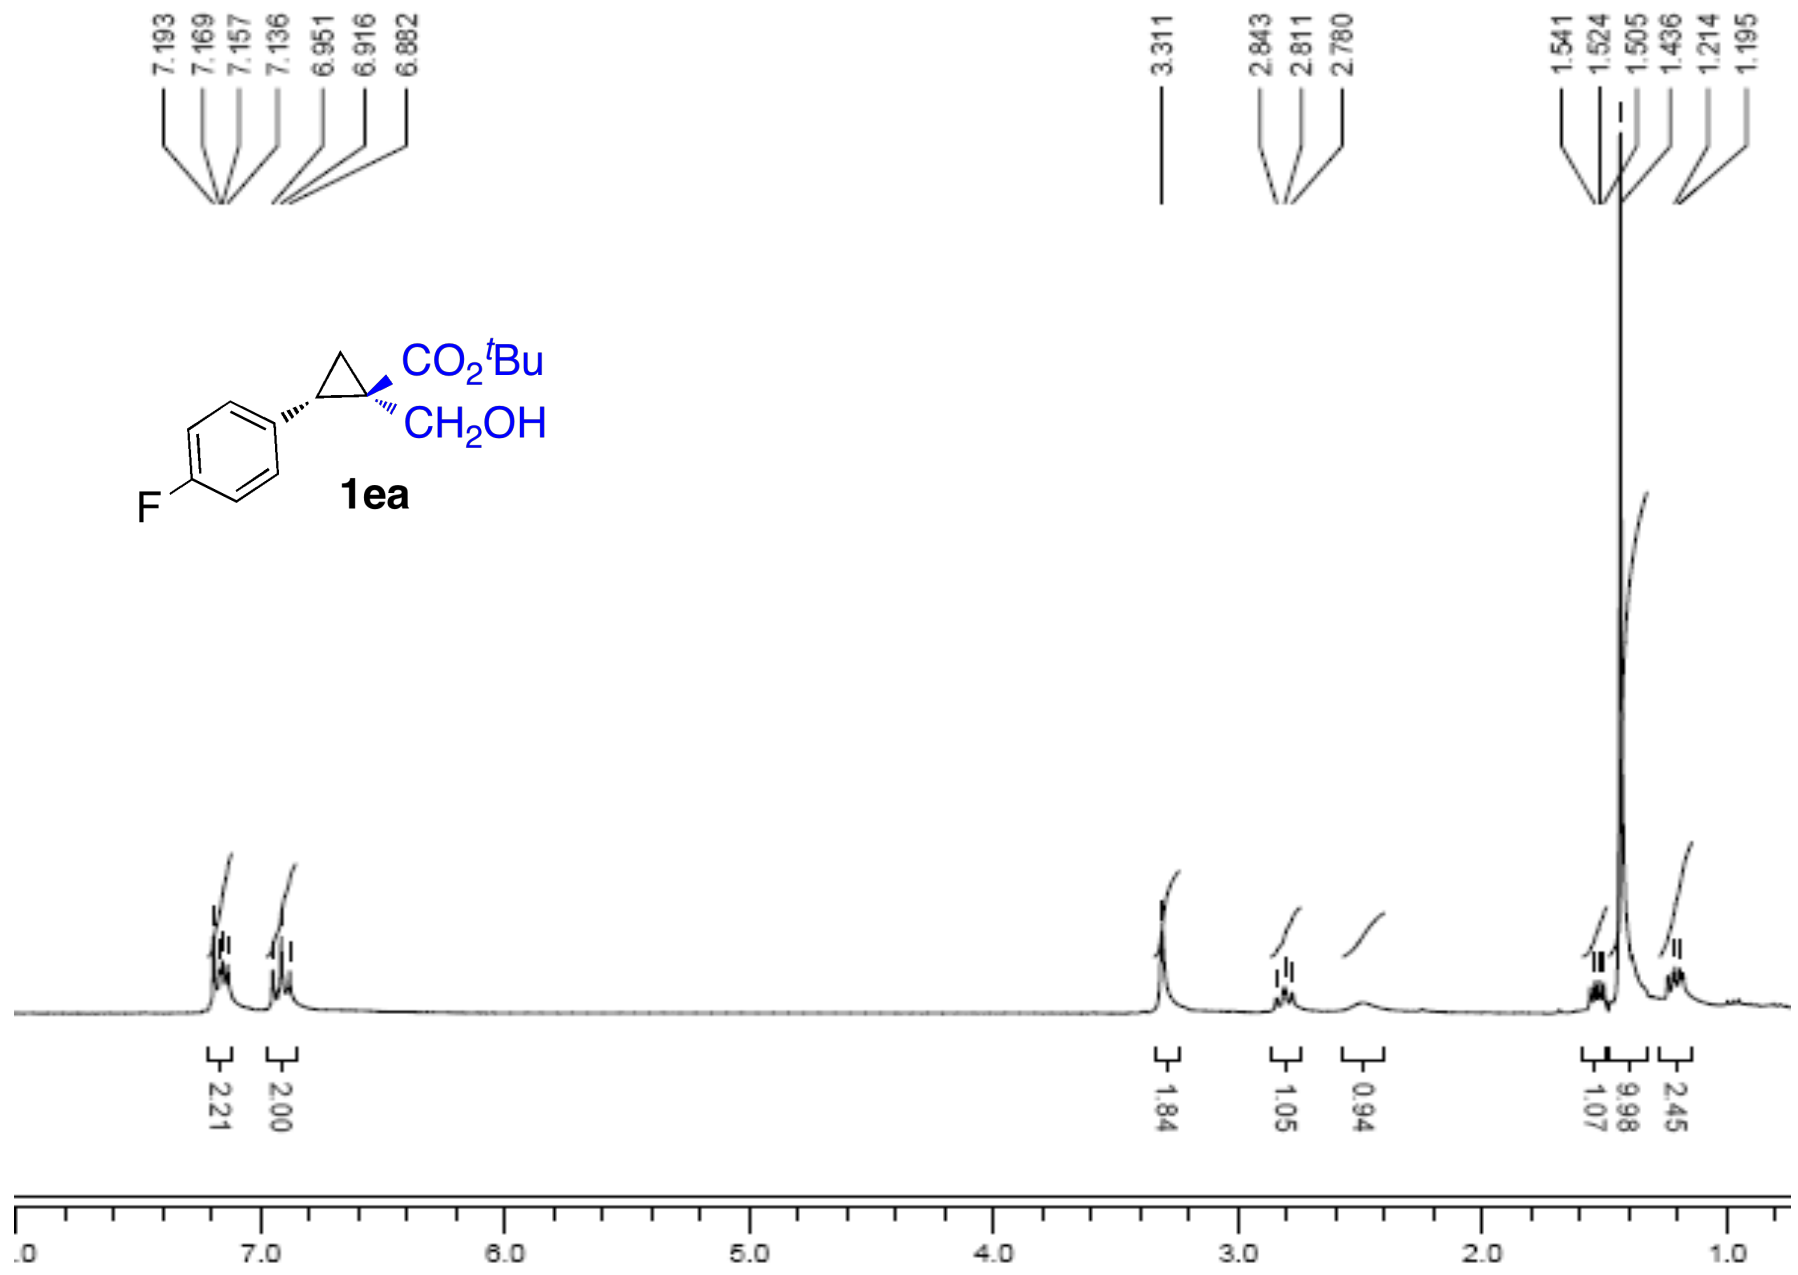

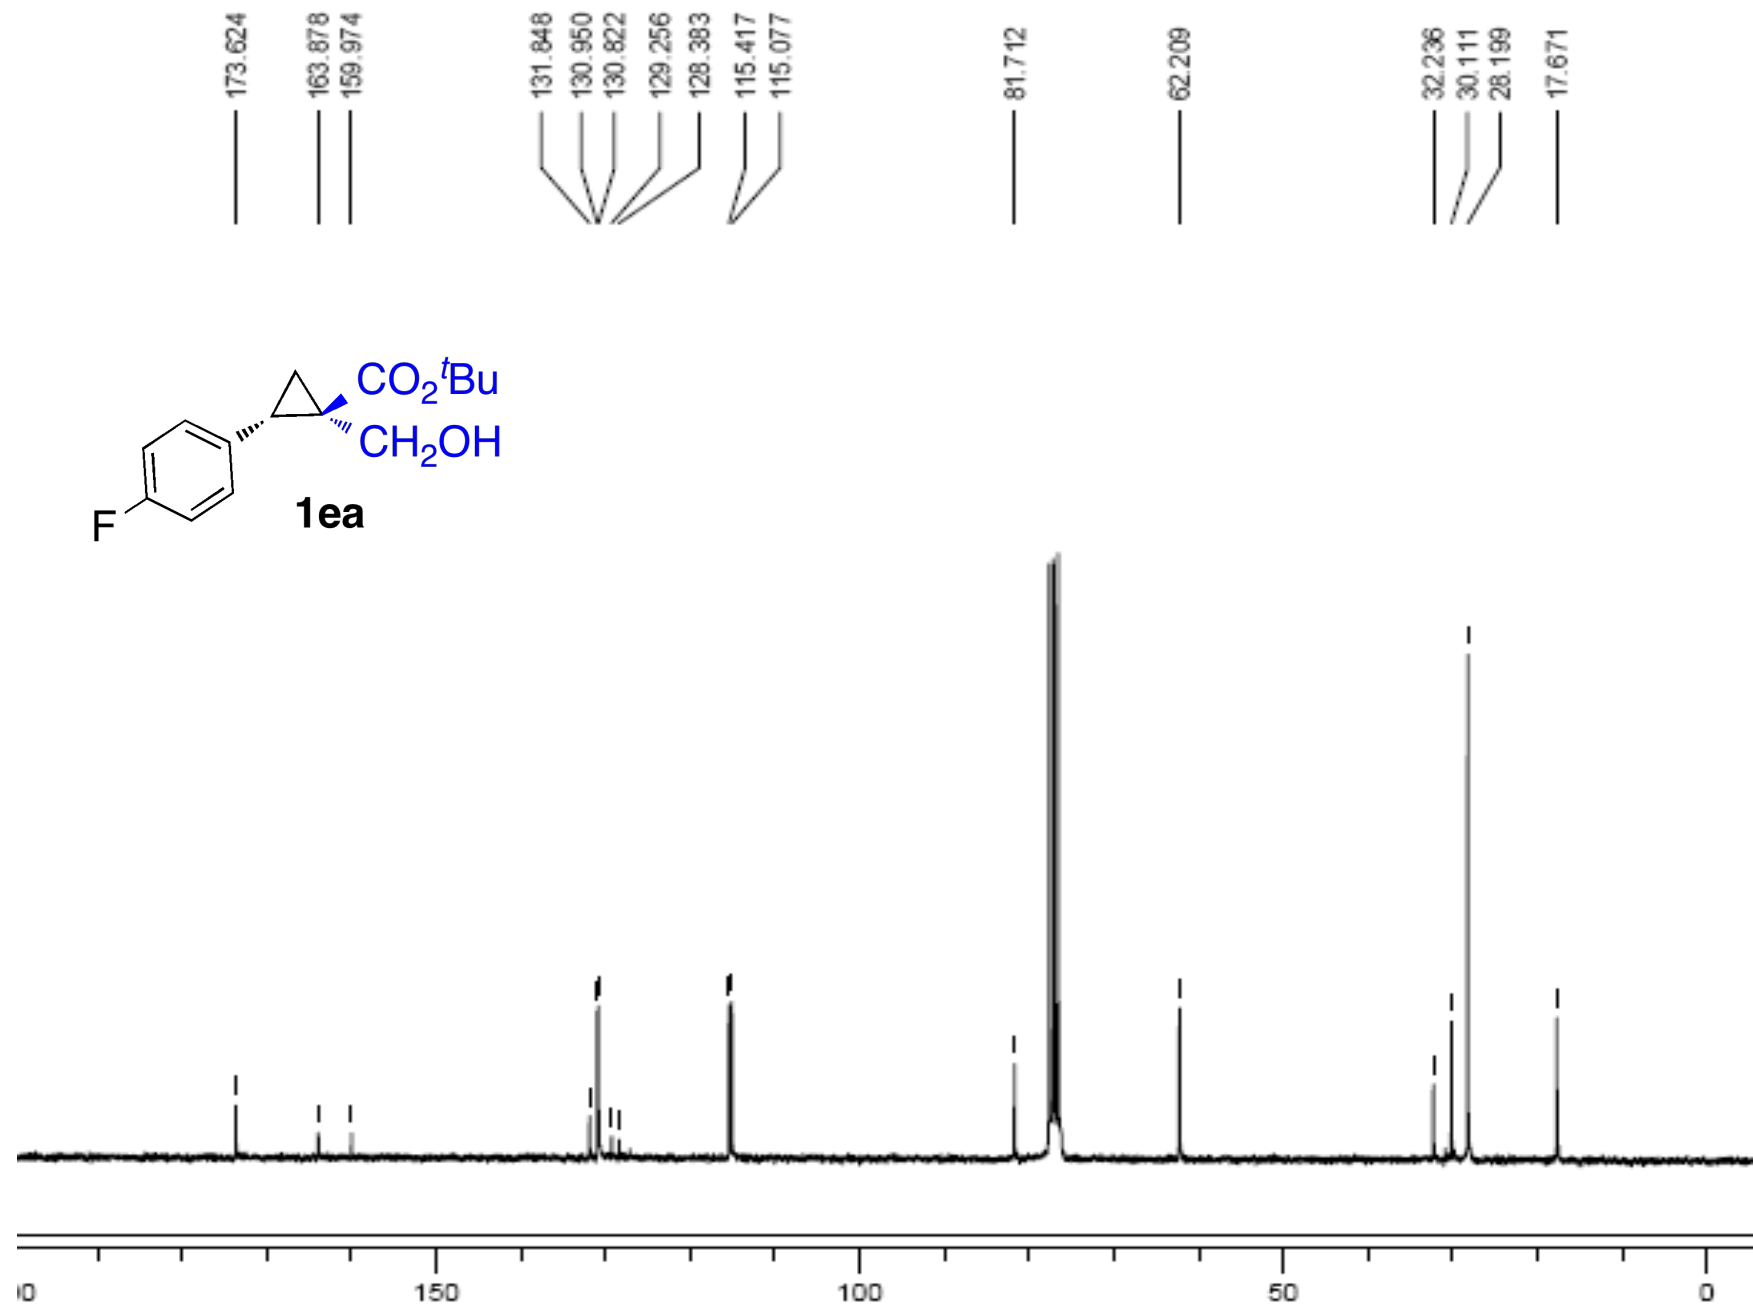

xx-vii-295 ADH 1%@0.8 ml

C:\EZStart\Projects\Default\Method\Shifa 4-t-Butylbenzene (OD-H 10-90).met

C:\EZStart\Projects\Default\Data\xx-vii-295 ADH 1%@0.8 ml

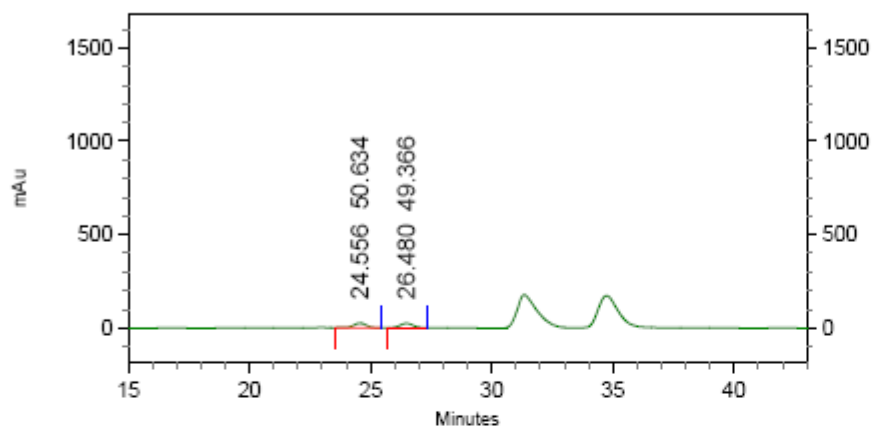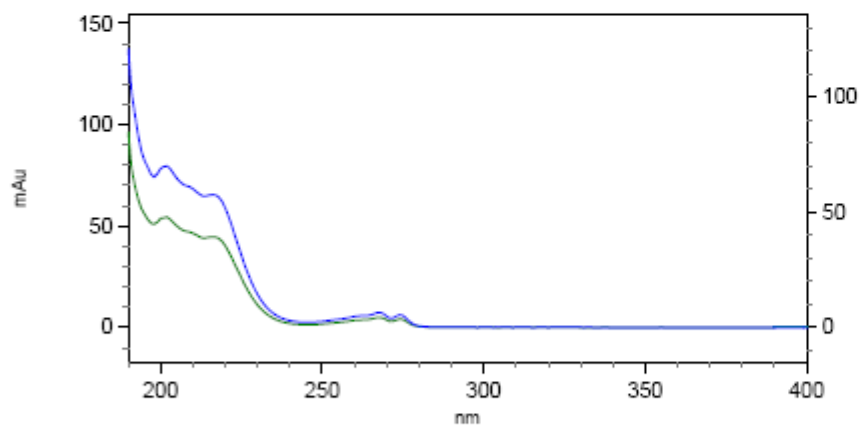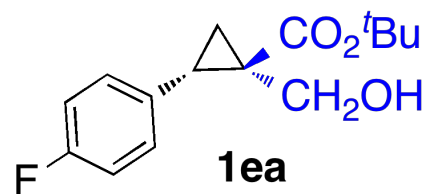

3: 216 nm, 4 nm

Results

| Pk # | Name | Retention Time | Area Percent |
|------|------|----------------|--------------|
| 1    |      | 24.556         | 50.634       |
| 2    |      | 26.480         | 49.366       |

|        |  |  |         |
|--------|--|--|---------|
| Totals |  |  | 100.000 |
|--------|--|--|---------|

xx-vii-299 ADH 1% @ 0.8 ml again

C:\EZStart\Projects\Default\Method\Shifa 4-t-Butylbenzene (OD-H 10-90).met

C:\EZStart\Projects\Default\Data\xx-vii-299 ADH 1% @ 0.8 ml again

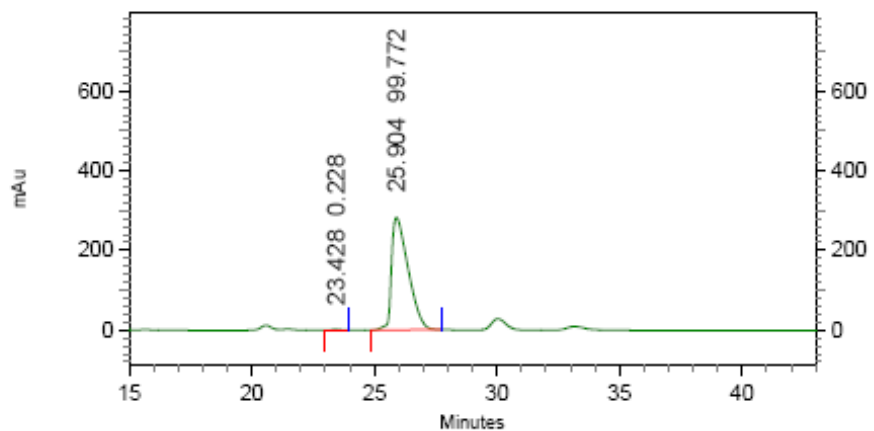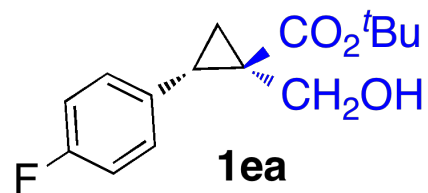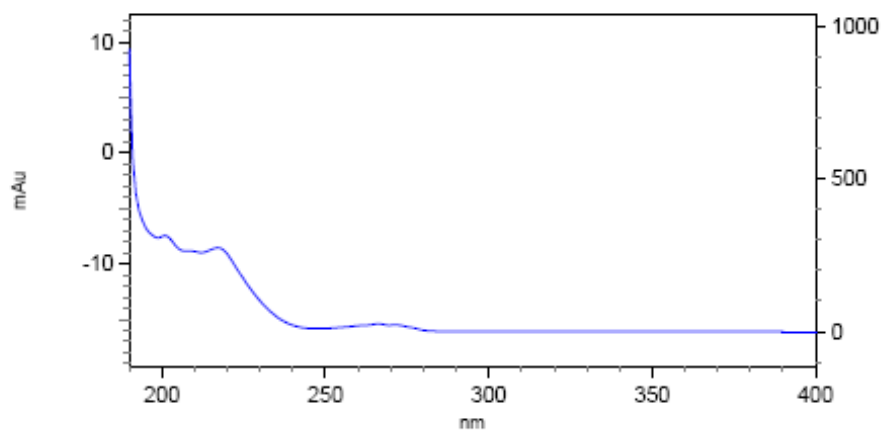

3: 229 nm, 4 nm

Results

| Pk #   | Name | Retention Time | Area Percent |
|--------|------|----------------|--------------|
| 1      |      | 23.428         | 0.228        |
| 2      |      | 25.904         | 99.772       |
| Totals |      |                | 100.000      |

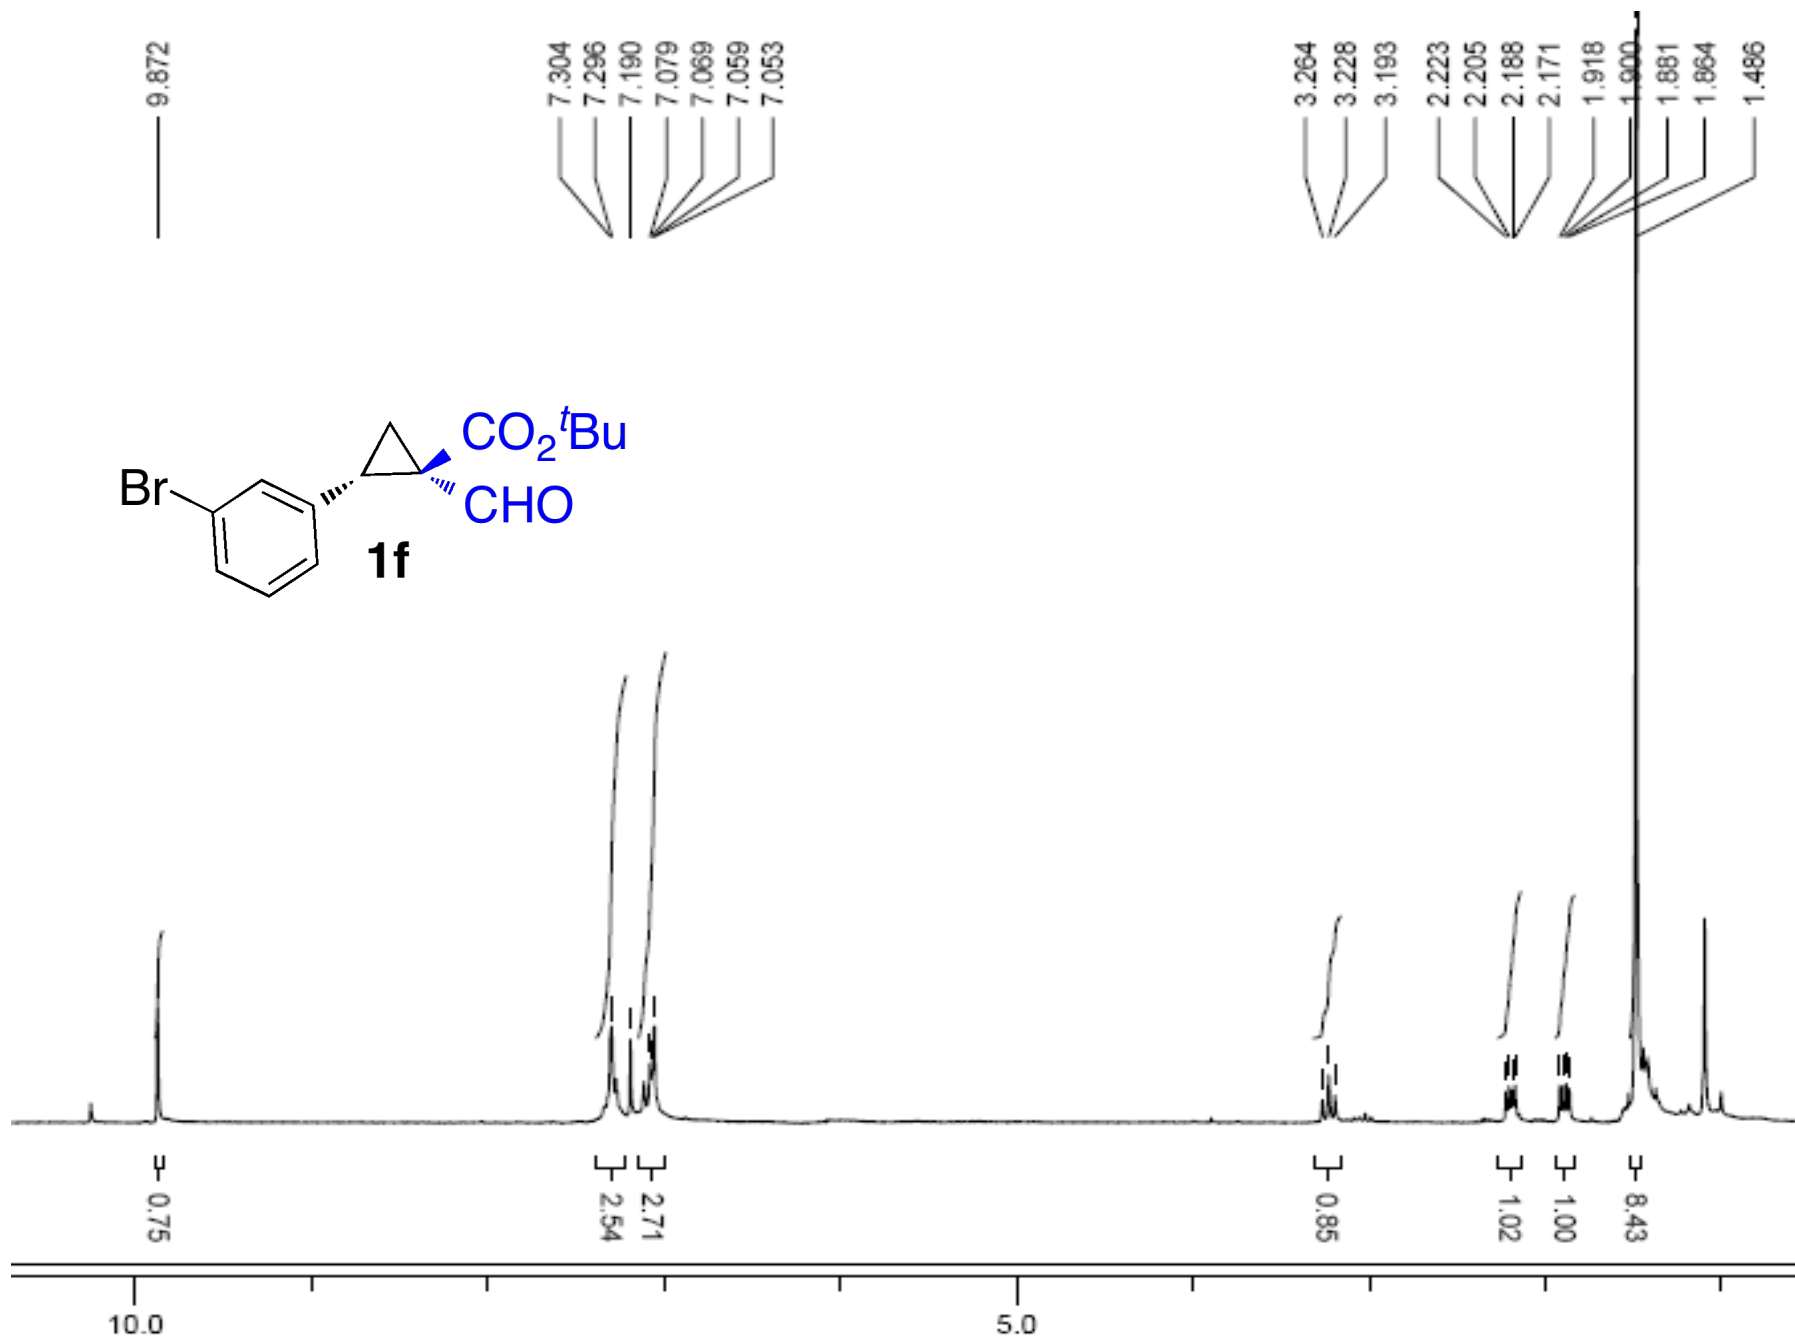

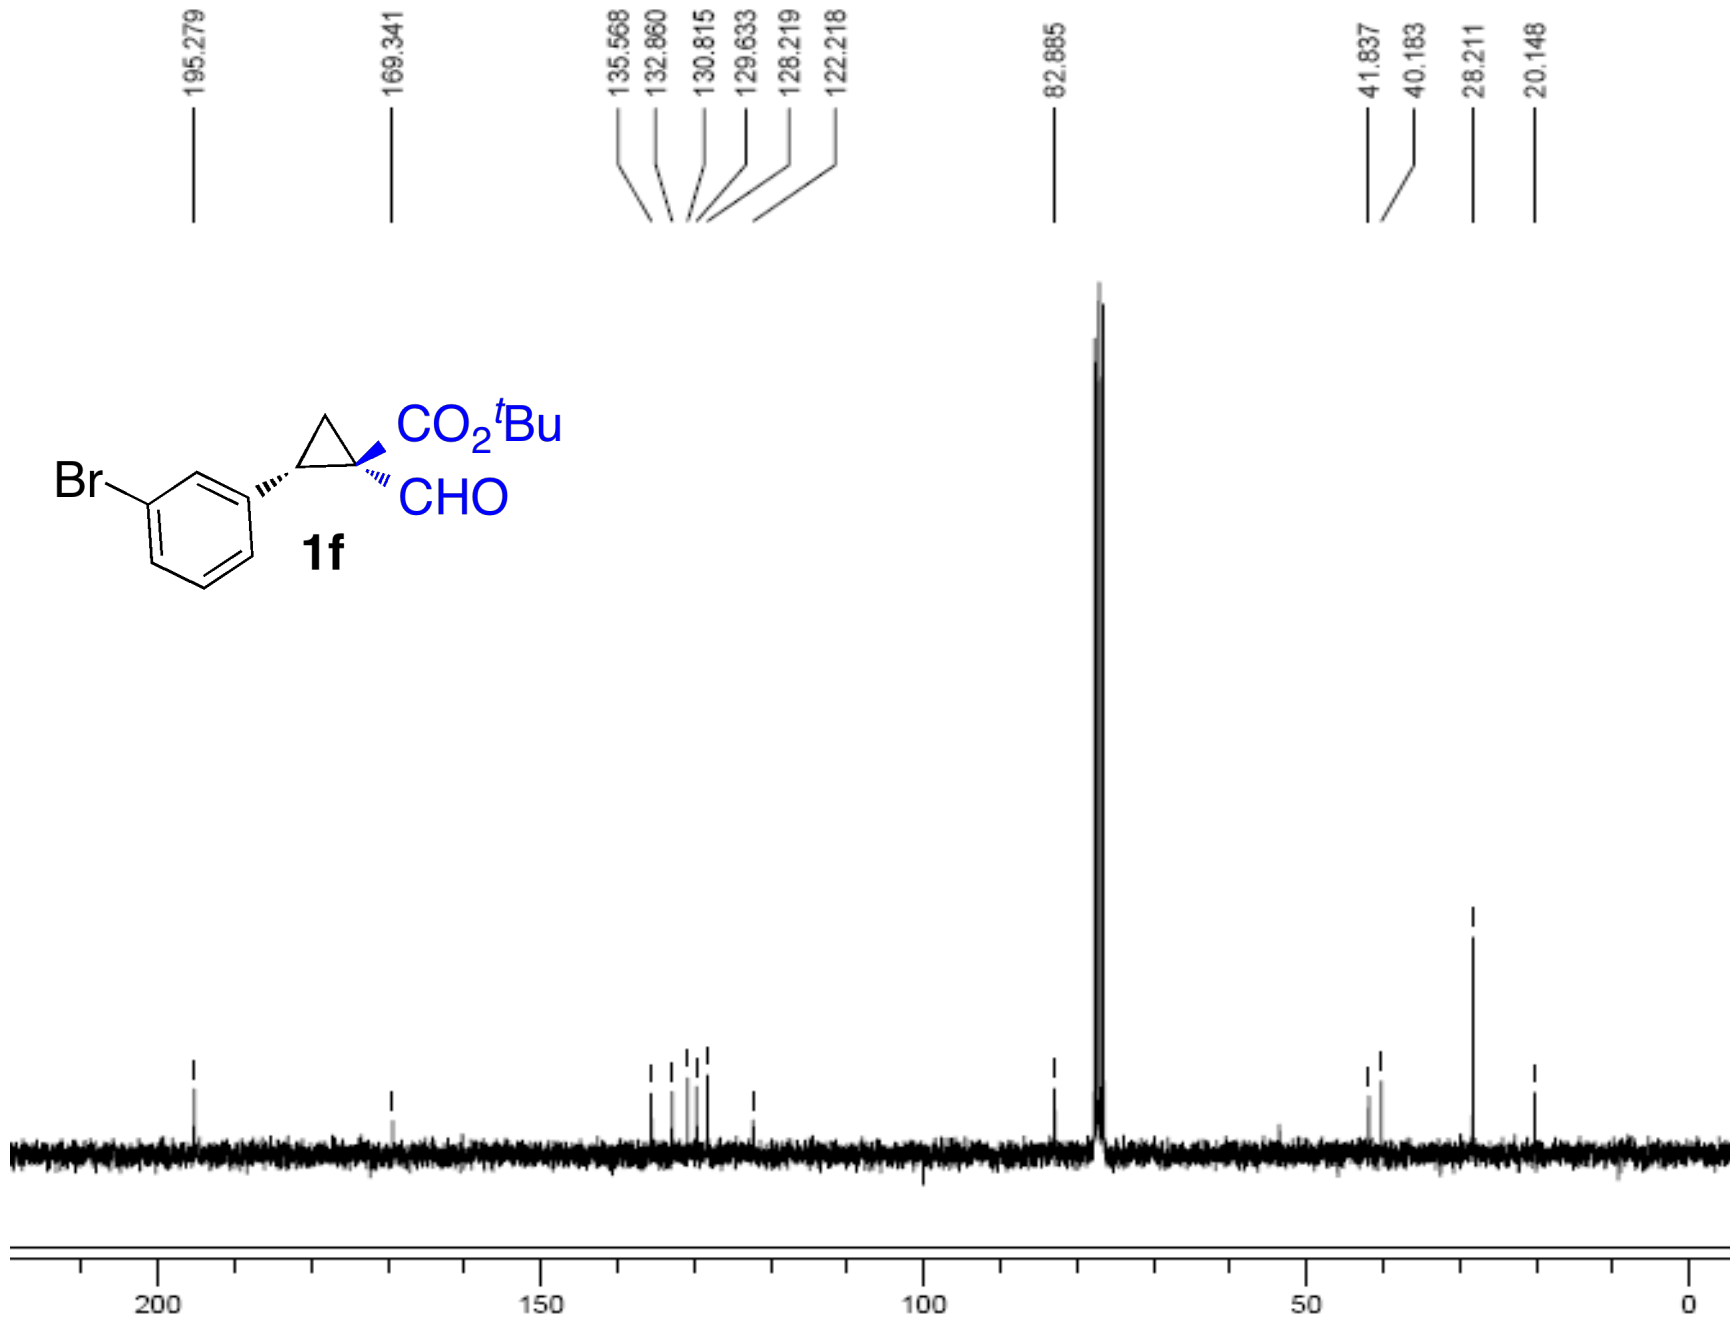



xx-vi-67-2 SDwhelk 2%@0.8 ml  
 C:\EZStart\Projects\Default\Method\Shifa-Nitro-Cyclopropane-1%.met  
 C:\EZStart\Projects\Default\Data\xx-vi-67-2 SDwhelk 2%@0.8 ml

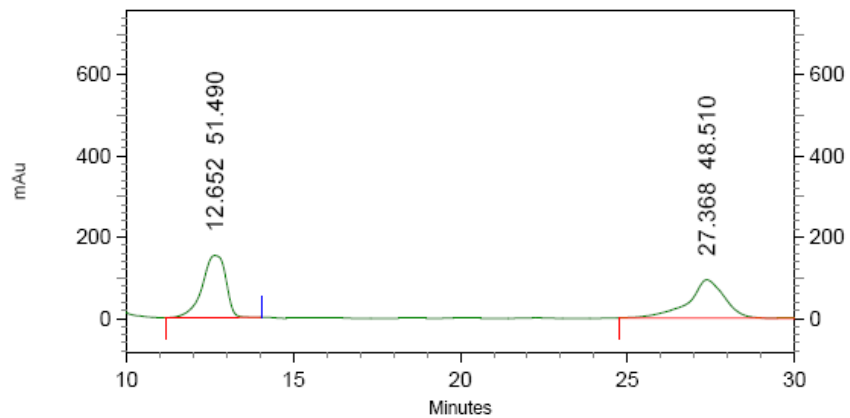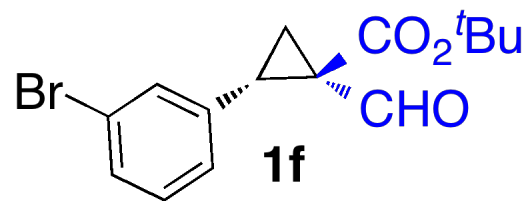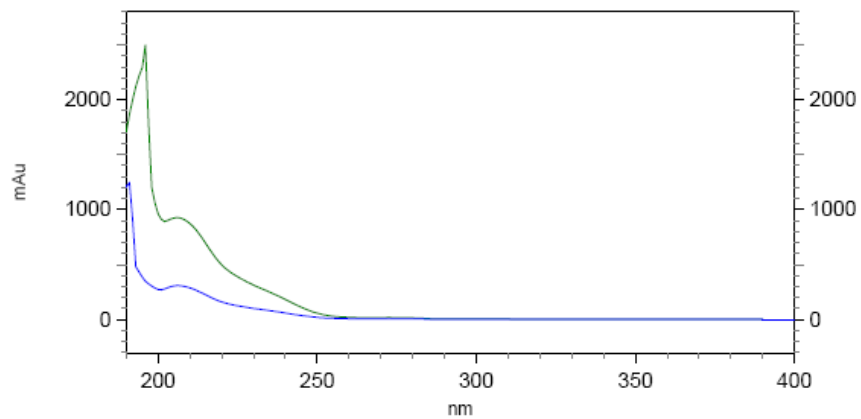

4: 231 nm, 4 nm  
 Results

| Pk #   | Name | Retention Time | Area Percent |
|--------|------|----------------|--------------|
| 1      |      | 12.652         | 51.490       |
| 2      |      | 27.368         | 48.510       |
| Totals |      |                | 100.000      |

xx-vi-82 SDwhelk 2%@0.8 ml  
C:\EZStart\Projects\Default\Method\Shifa-Nitro-Cyclopropane-1%.met  
C:\EZStart\Projects\Default\Data\xx-vi-82 SDwhelk 2%@0.8 ml

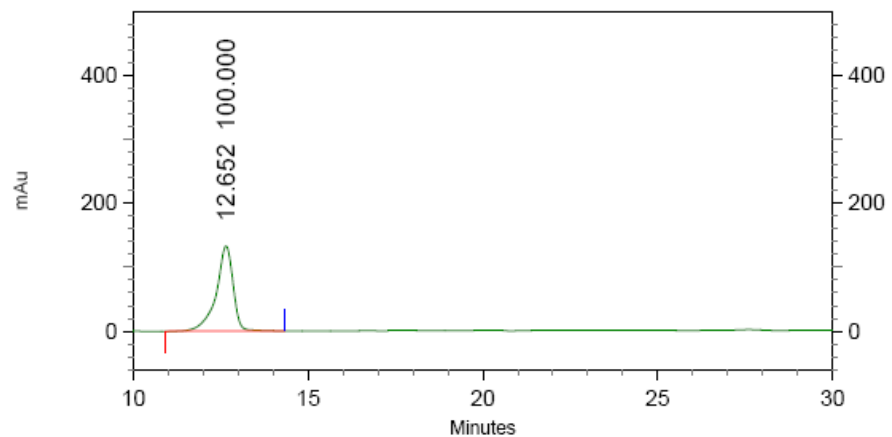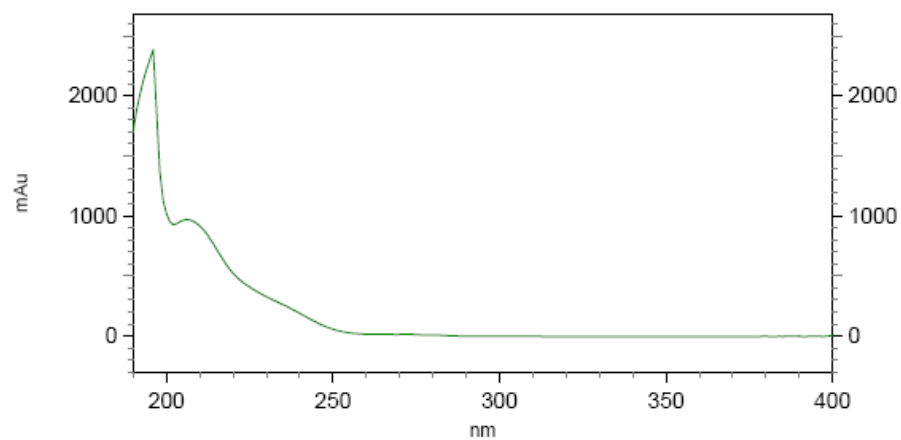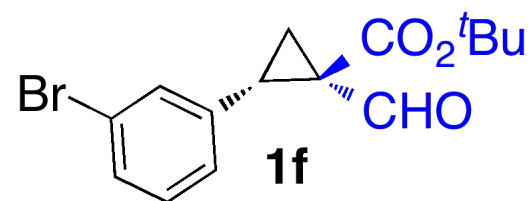

4: 230 nm, 4 nm  
Results

| Pk #   | Name | Retention Time | Area Percent |
|--------|------|----------------|--------------|
| 1      |      | 12.652         | 100.000      |
| Totals |      |                | 100.000      |

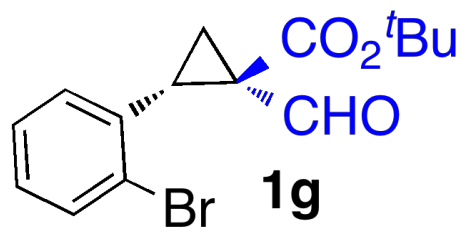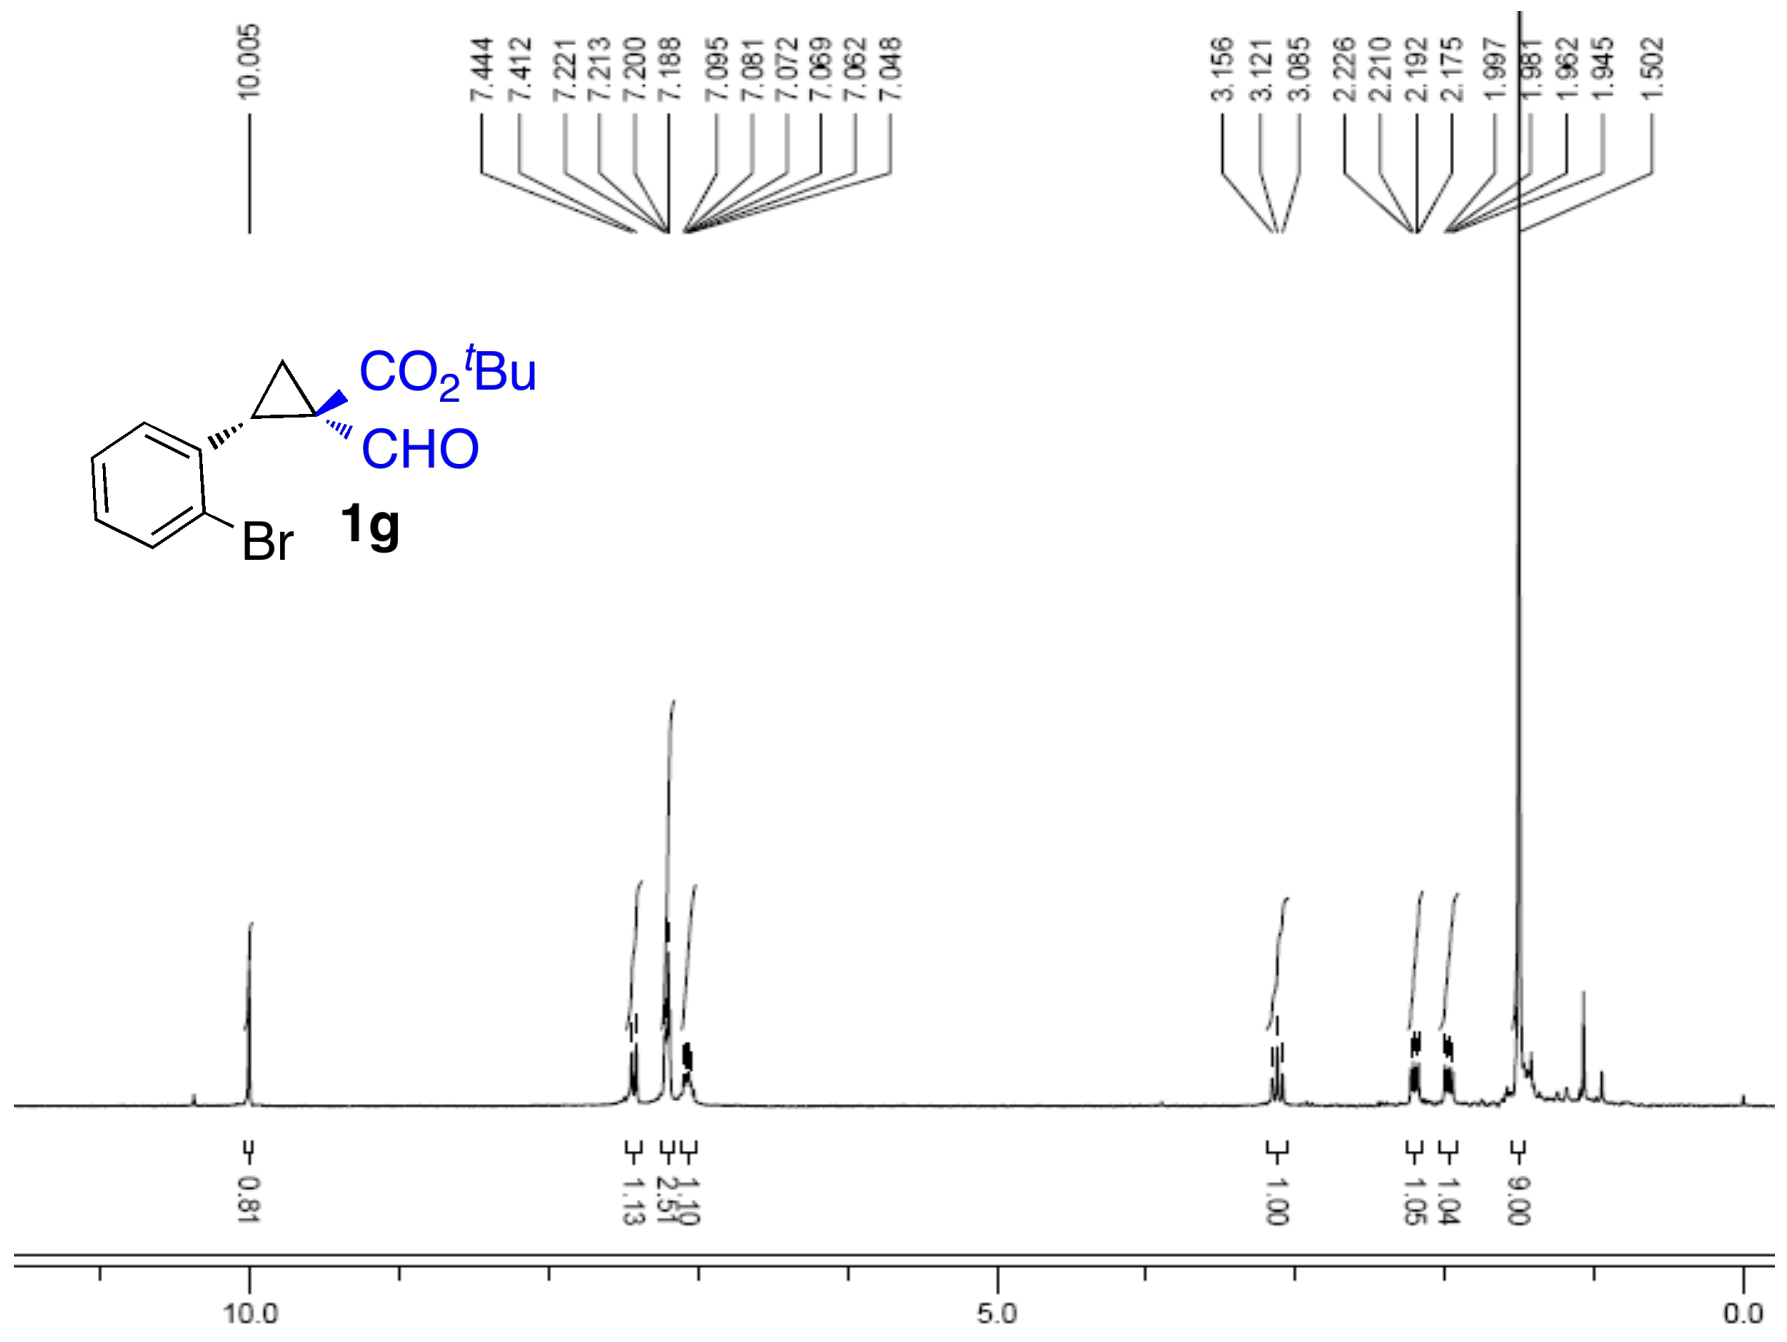

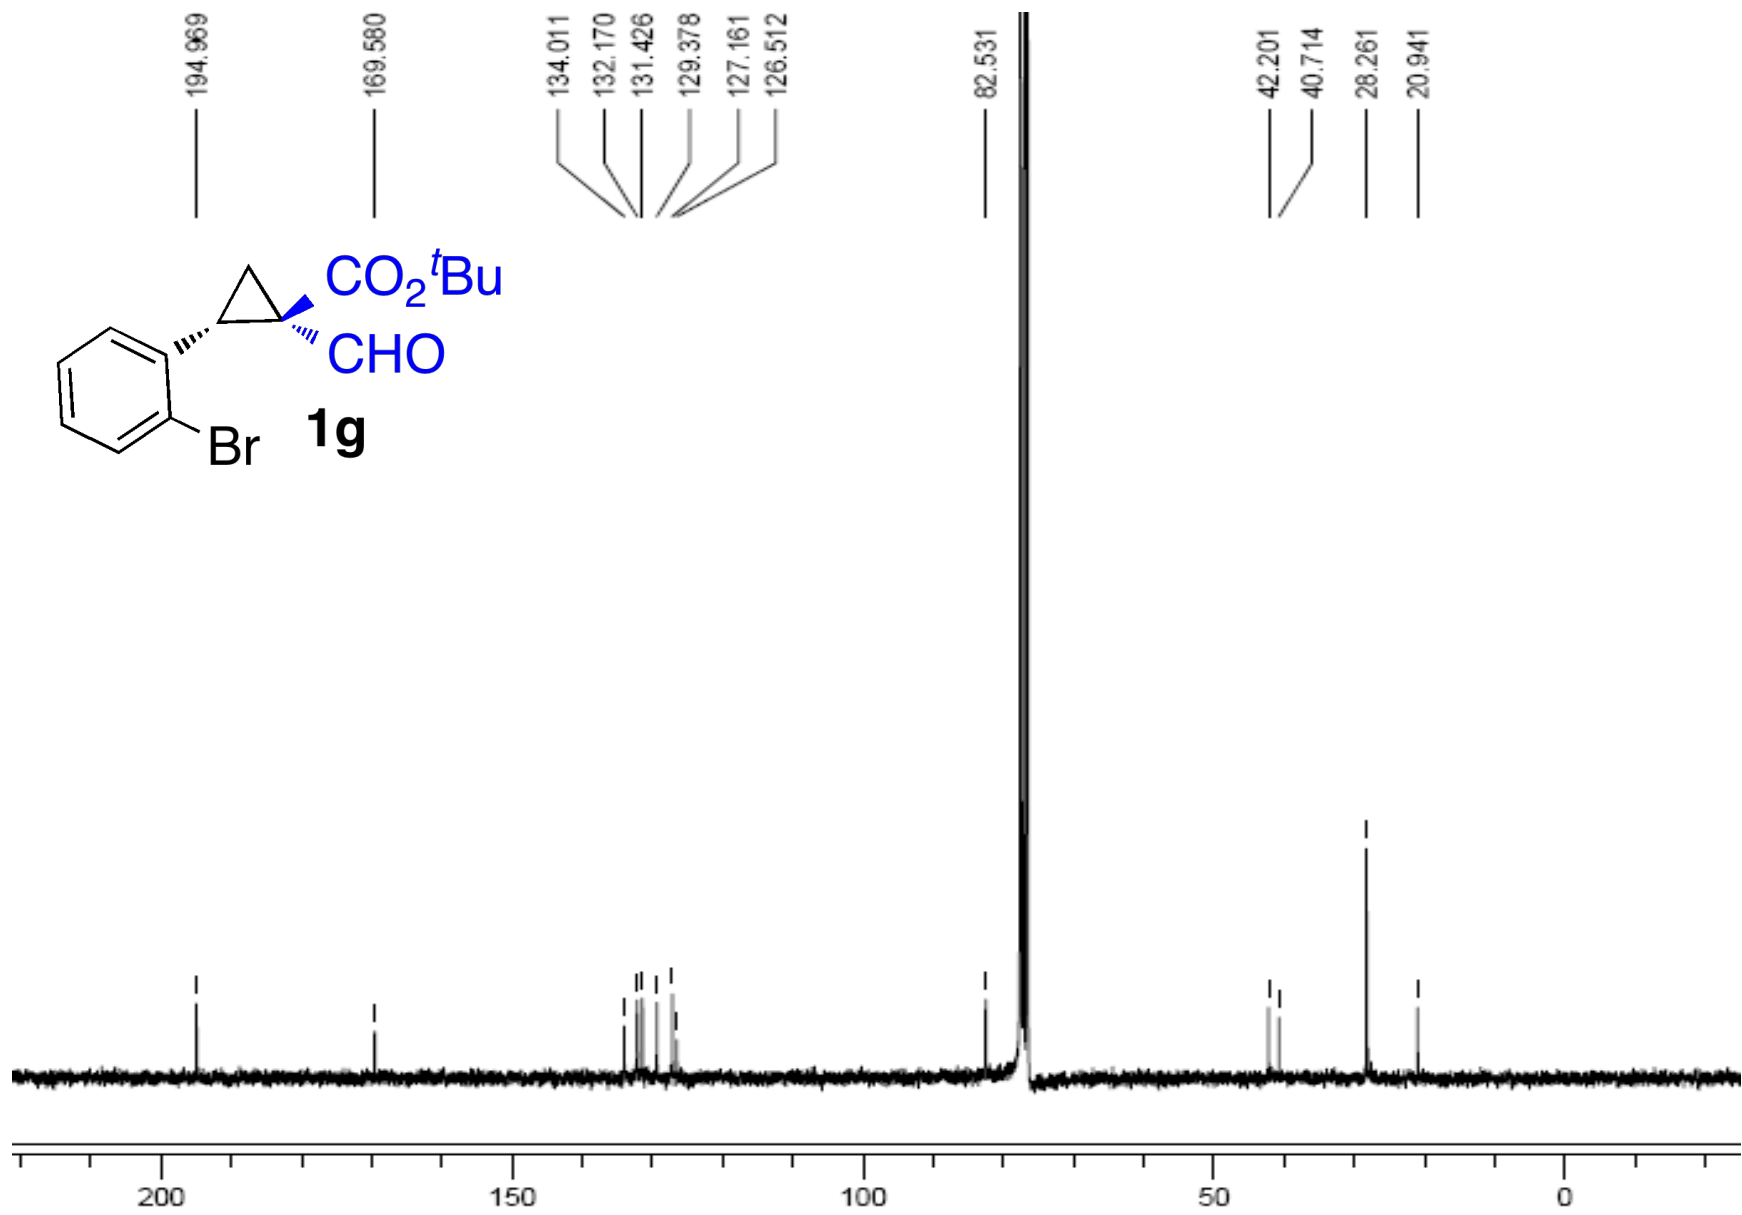

xx-vi-67-3 whelk 1%0.8 ml AGAIN  
 C:\EZStart\Projects\Default\Method\Shifa-EDA.met  
 E:\HPLC\xx-vi-67-3 whelk 1%0.8 ml AGAIN

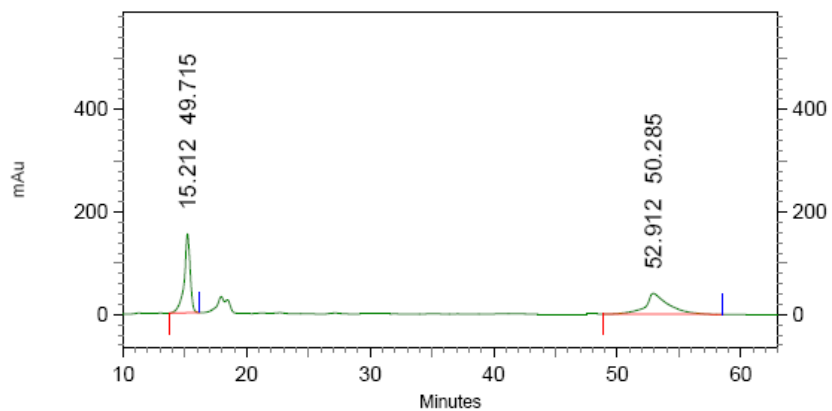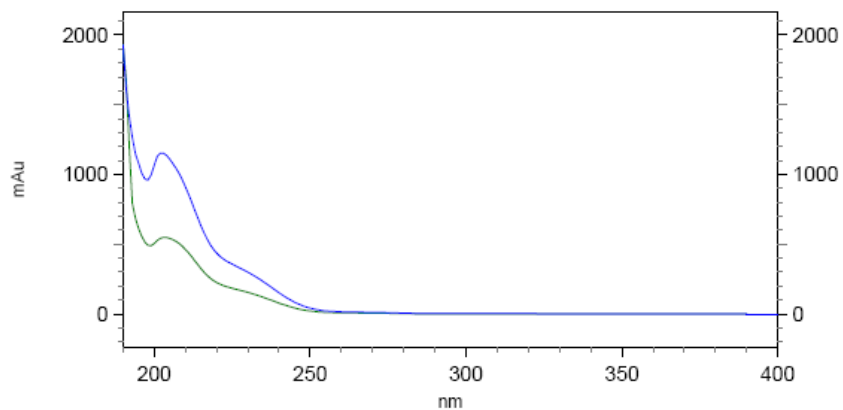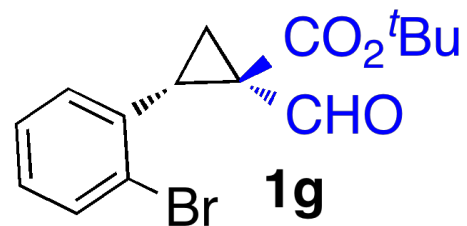

2: 226 nm, 4 nm

Results

| Pk #   | Name | Retention Time | Area Percent |
|--------|------|----------------|--------------|
| 1      |      | 15.212         | 49.715       |
| 2      |      | 52.912         | 50.285       |
| Totals |      |                | 100.000      |

xx-vi-83 whelk 1%@0.8 ml  
 C:\EZStart\Projects\Default\Method\Shifa-EDA.met  
 E:\HPLC\xx-vi-83 whelk 1%@0.8 ml

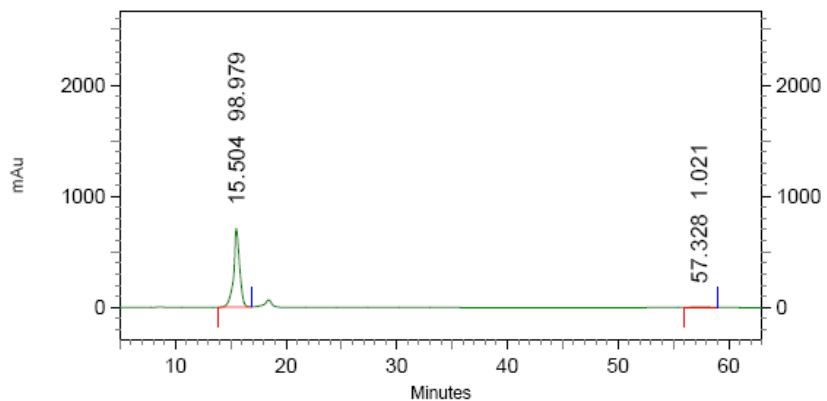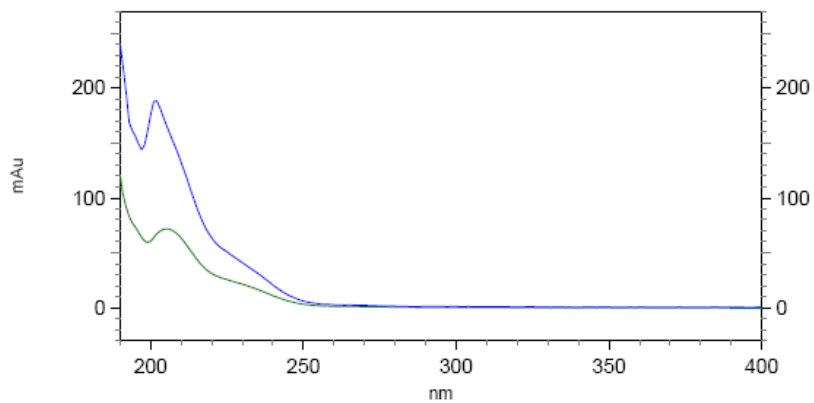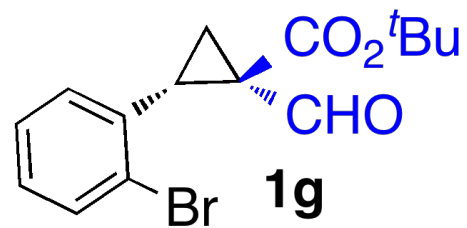

2: 226 nm, 4 nm

Results

| Pk #   | Name | Retention Time | Area Percent |
|--------|------|----------------|--------------|
| 1      |      | 15.504         | 98.979       |
| 2      |      | 57.328         | 1.021        |
| Totals |      |                | 100.000      |

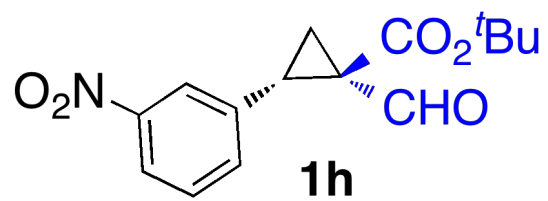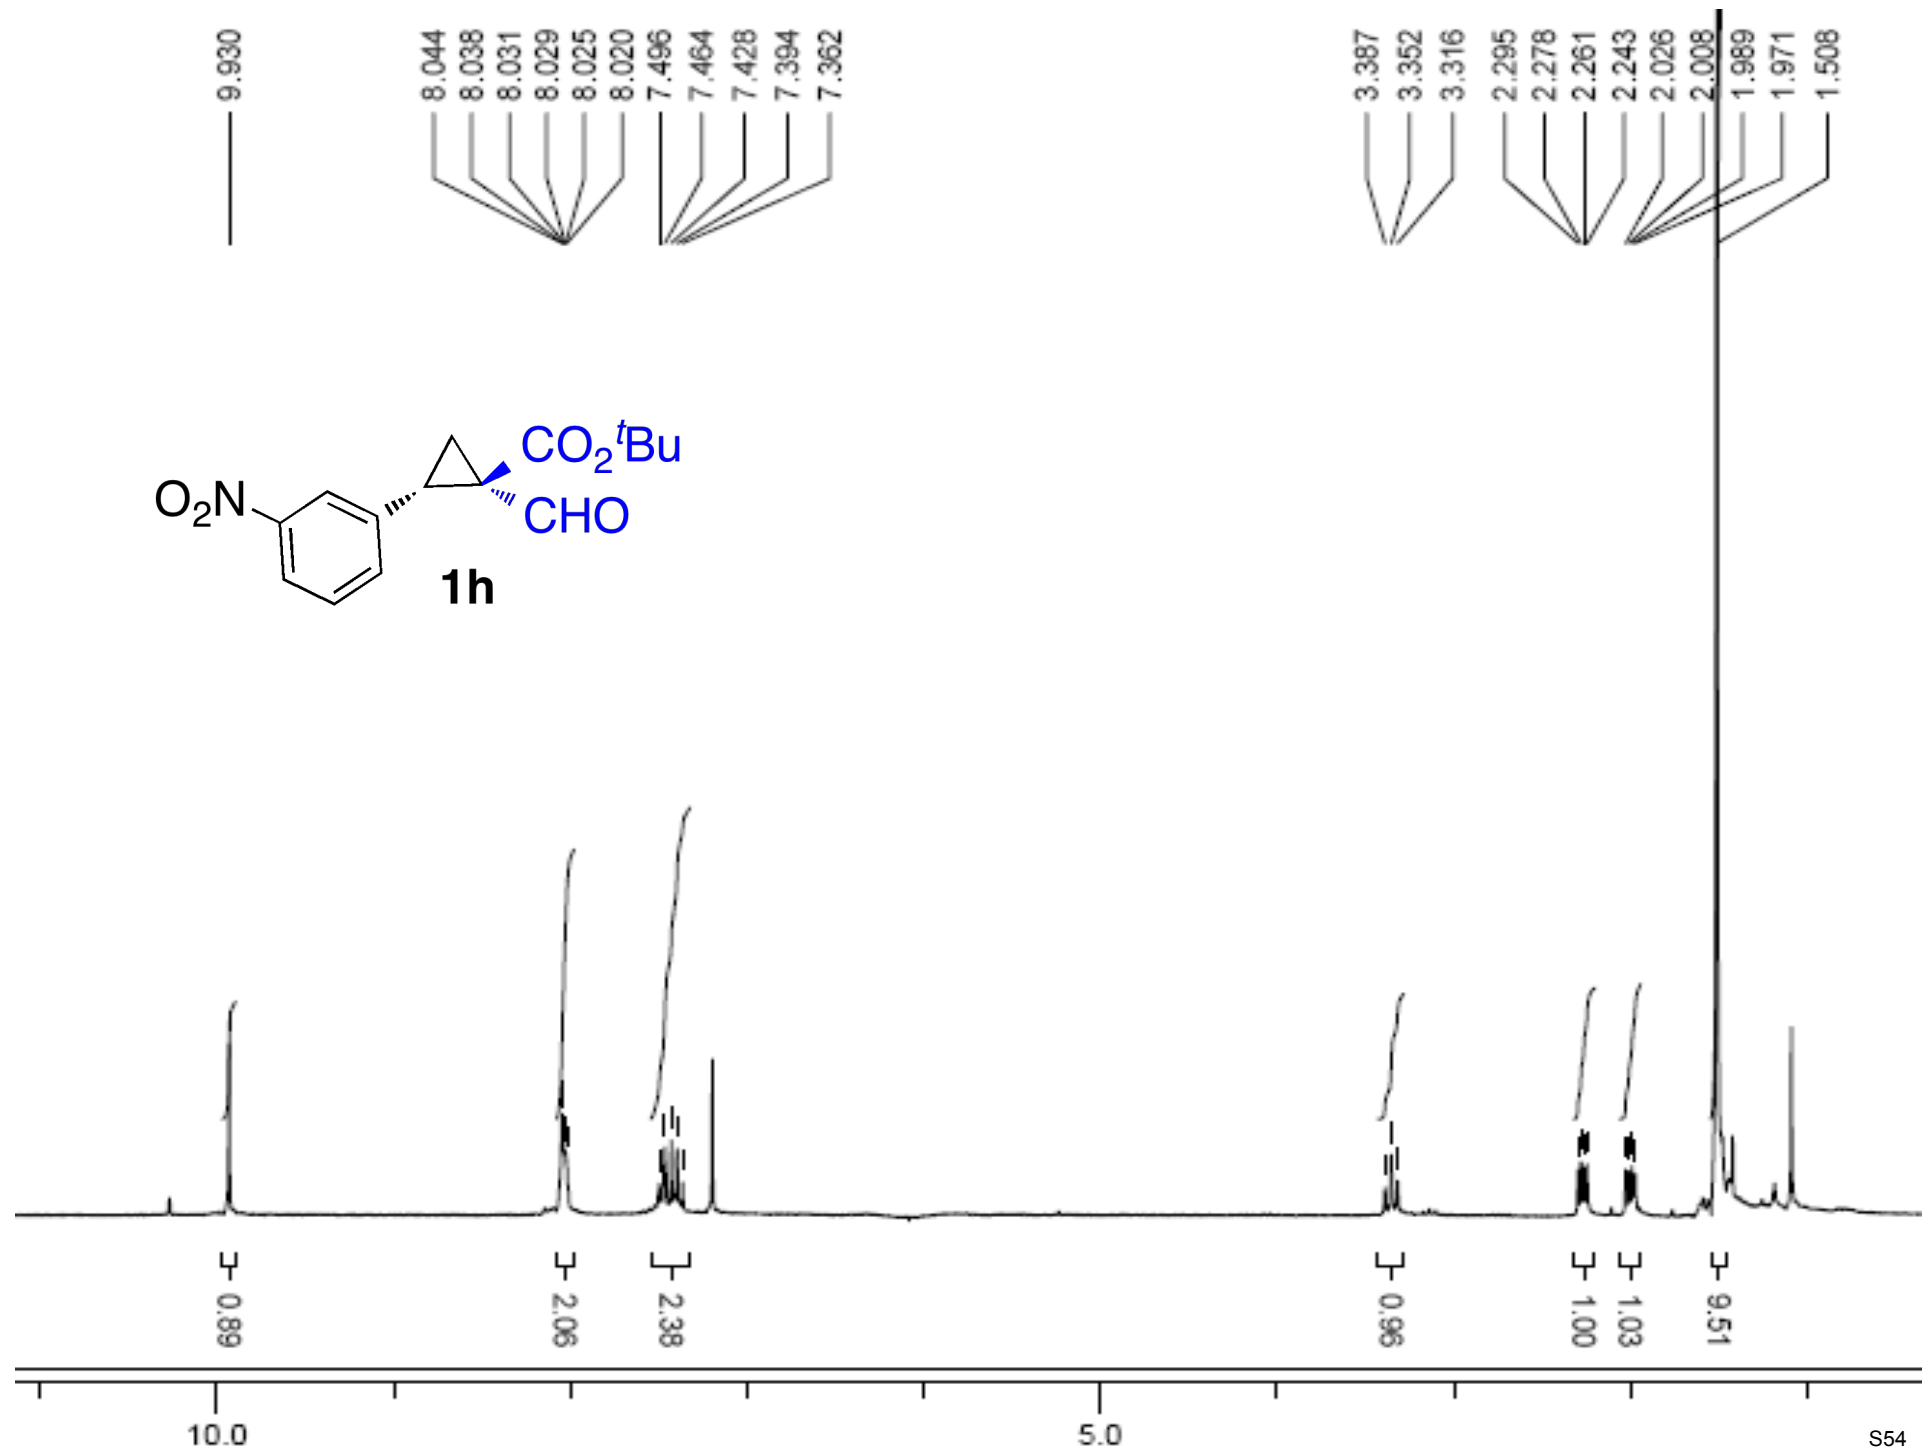

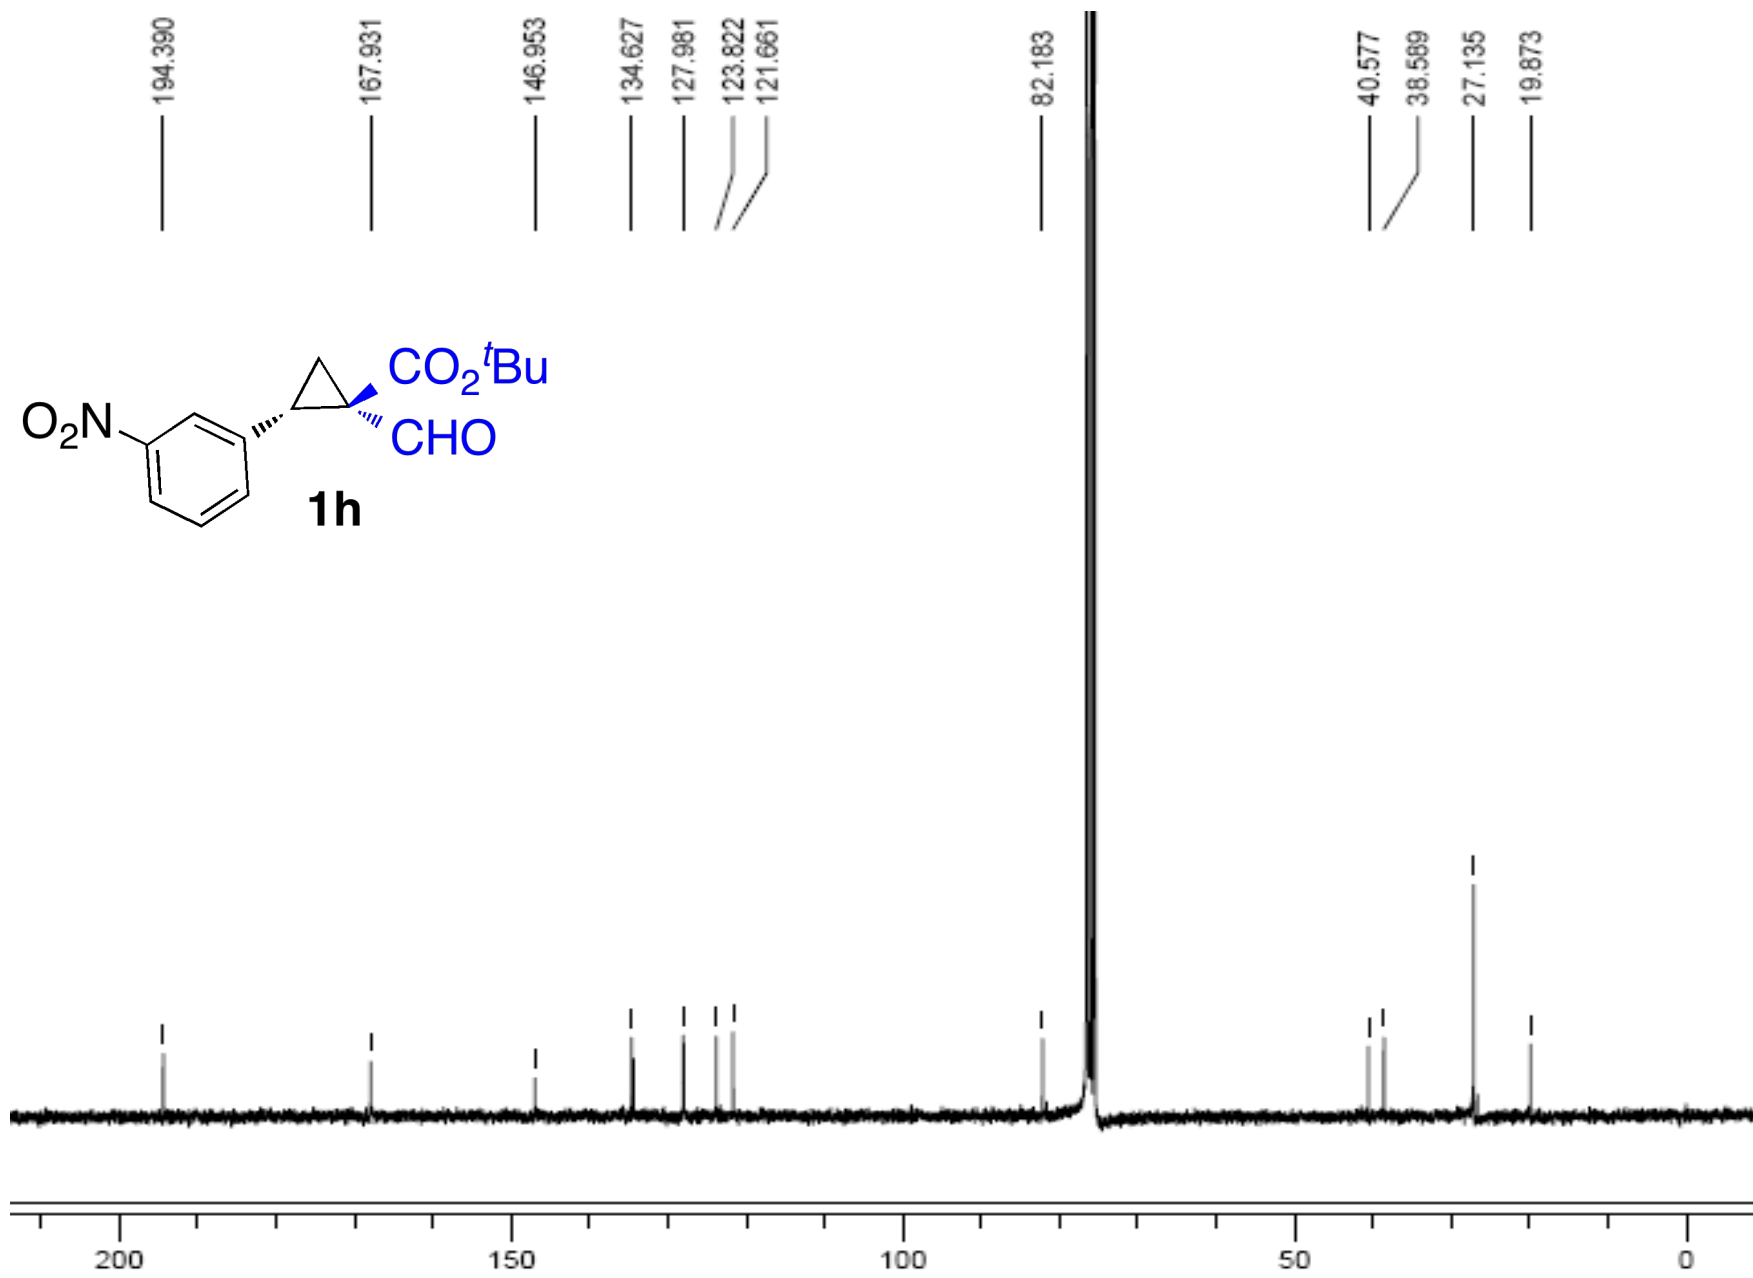



xx-vi-67-1SDwhelk 2%@0.8 ml

C:\EZStart\Projects\Default\Method\Shifa-Nitro-Cyclopropane-1%.met

C:\EZStart\Projects\Default\Data\xx-vi-67-1SDwhelk 2%@0.8 ml

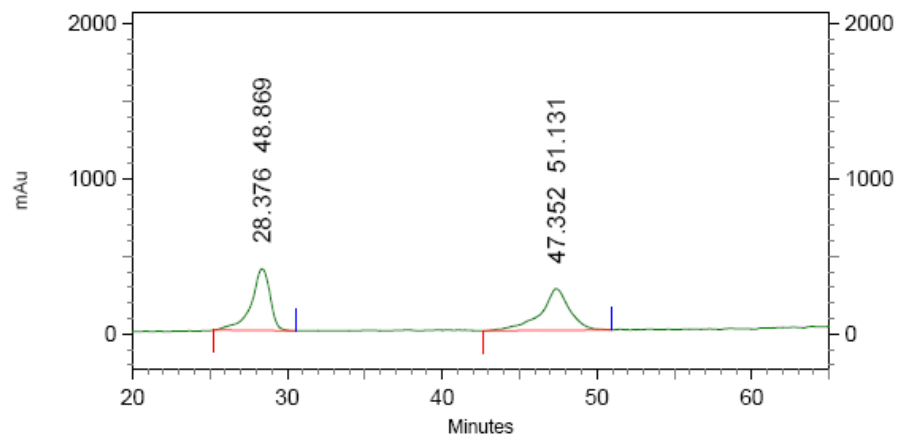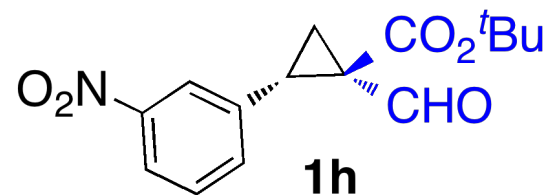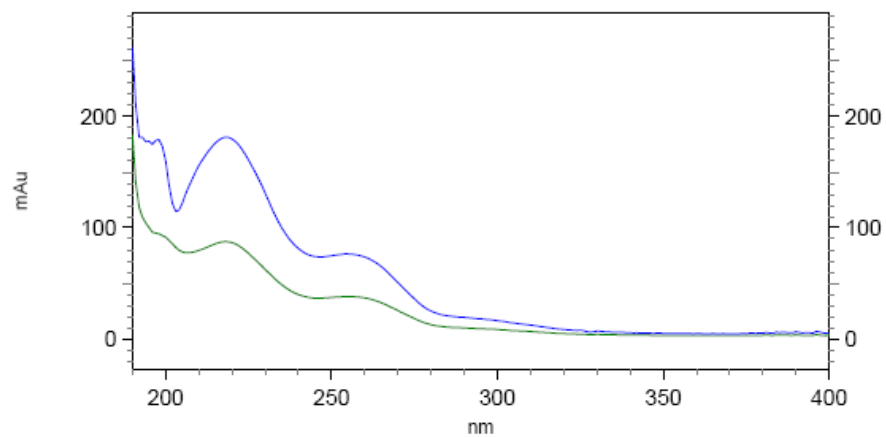

4: 221 nm, 4 nm

Results

| Pk #   | Name | Retention Time | Area Percent |
|--------|------|----------------|--------------|
| 1      |      | 28.376         | 48.869       |
| 2      |      | 47.352         | 51.131       |
| Totals |      |                | 100.000      |

xx-vi-81 SDwhelk 2%@0.8 ml  
 C:\EZStart\Projects\Default\Method\Shifa-Nitro-Cyclopropane-1%.met  
 C:\EZStart\Projects\Default\Data\xx-vi-81 SDwhelk 2%@0.8 ml

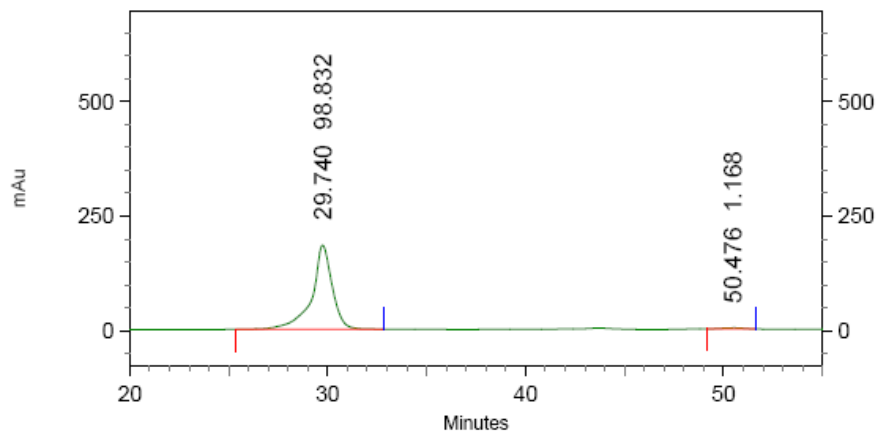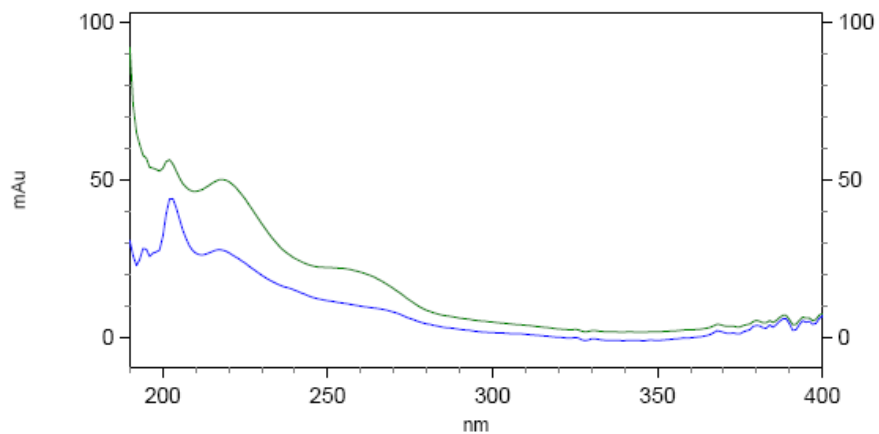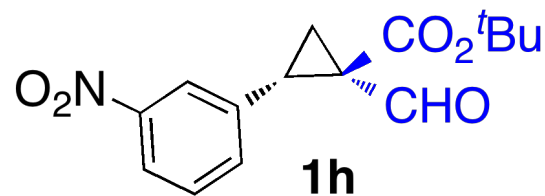

4: 231 nm, 4 nm  
 Results

| Pk #   | Name | Retention Time | Area Percent |
|--------|------|----------------|--------------|
| 1      |      | 29.740         | 98.832       |
| 2      |      | 50.476         | 1.168        |
| Totals |      |                | 100.000      |

7.961  
7.955  
7.949  
7.944  
7.935  
7.931  
7.925  
7.694  
7.673  
7.566  
7.304  
7.283  
7.269  
7.249

3.116  
3.095  
3.073  
2.460  
2.173  
2.170  
2.161  
2.154  
2.141  
1.924  
1.911  
1.901  
1.888  
1.464

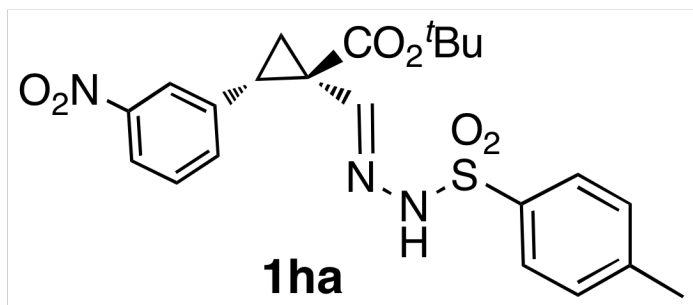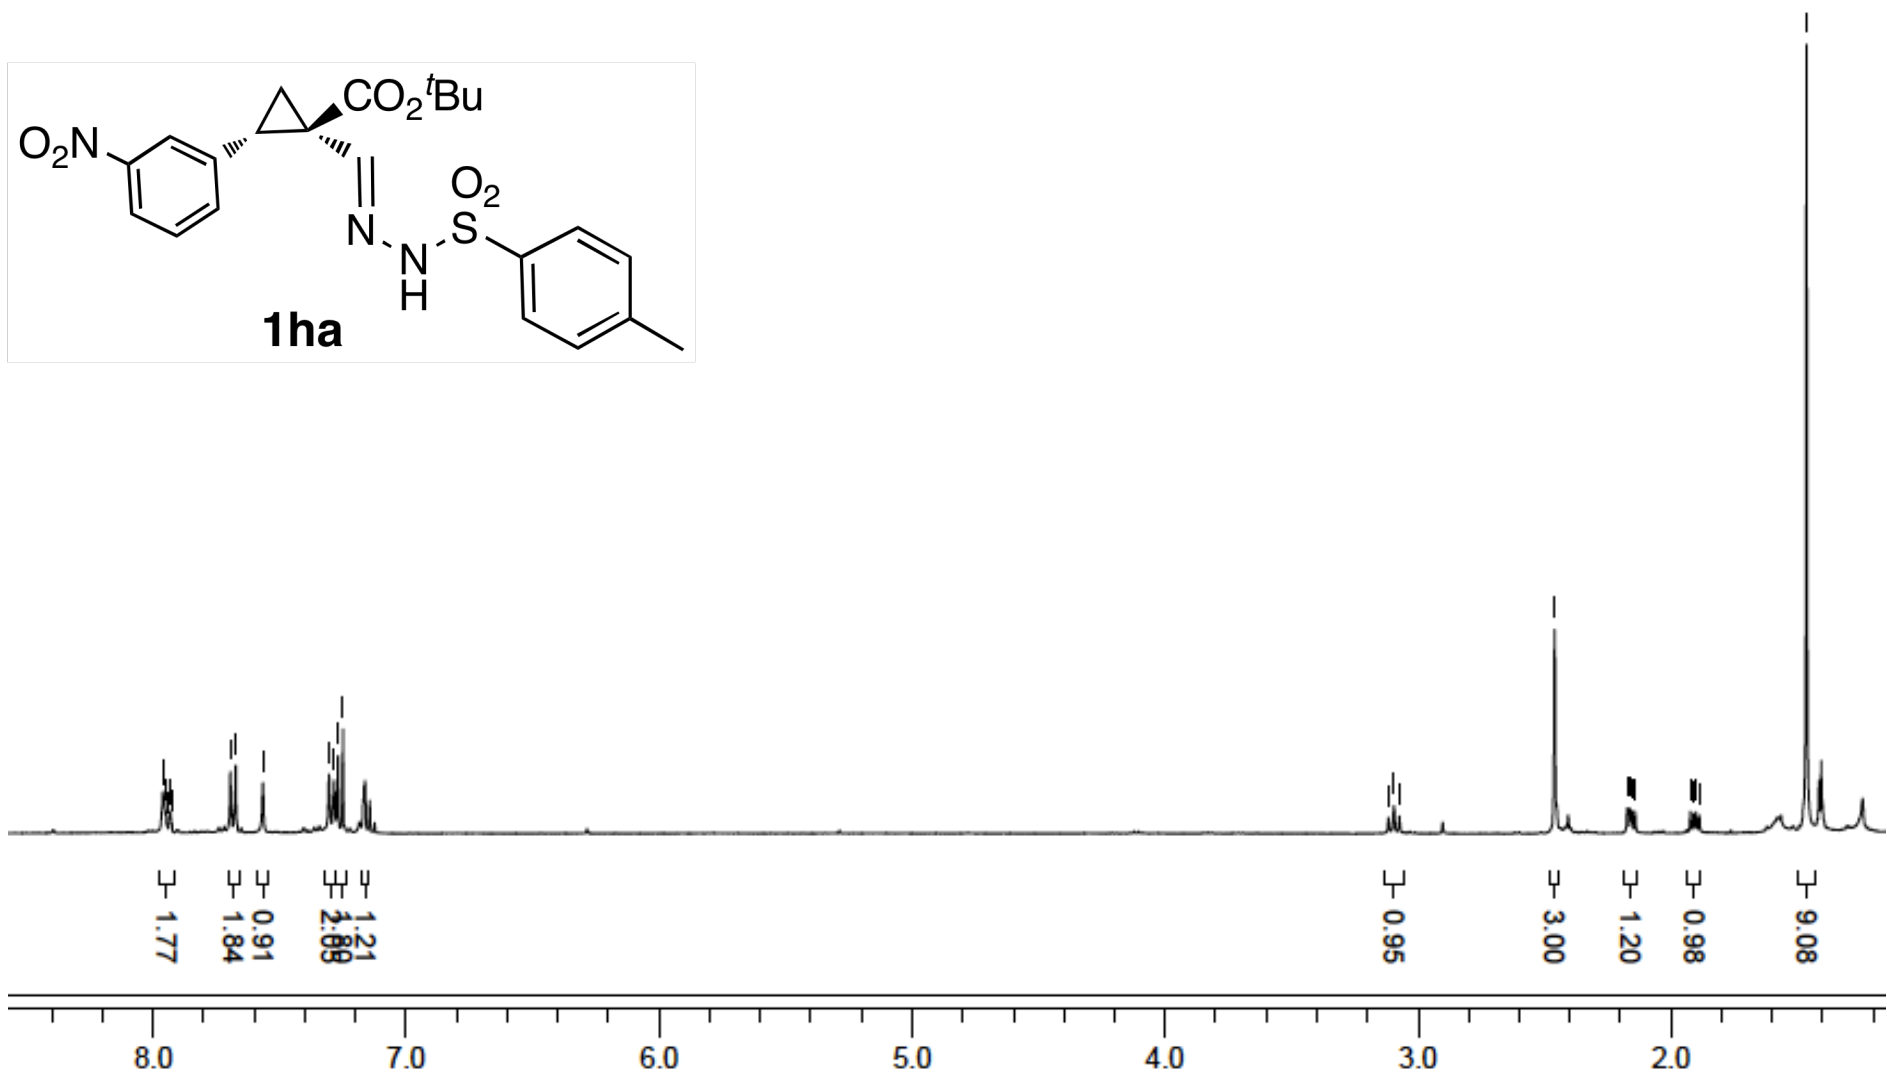

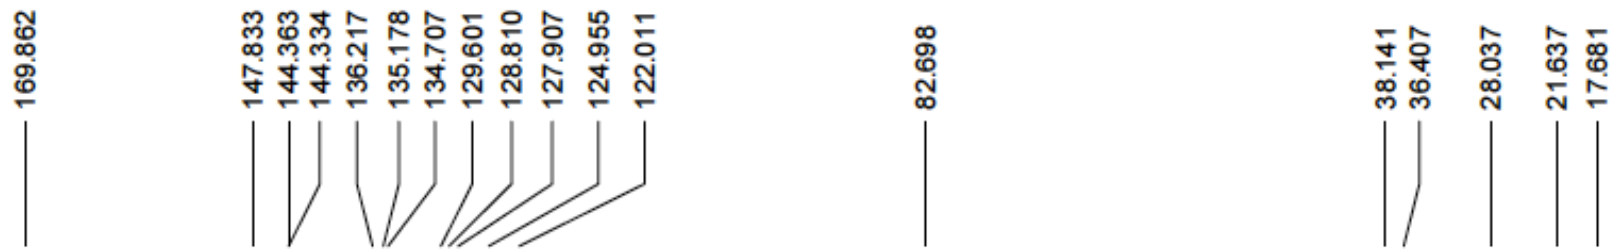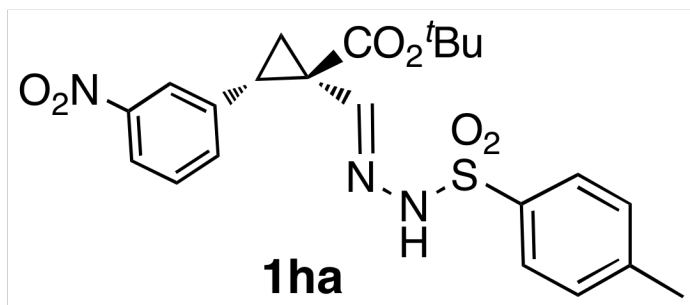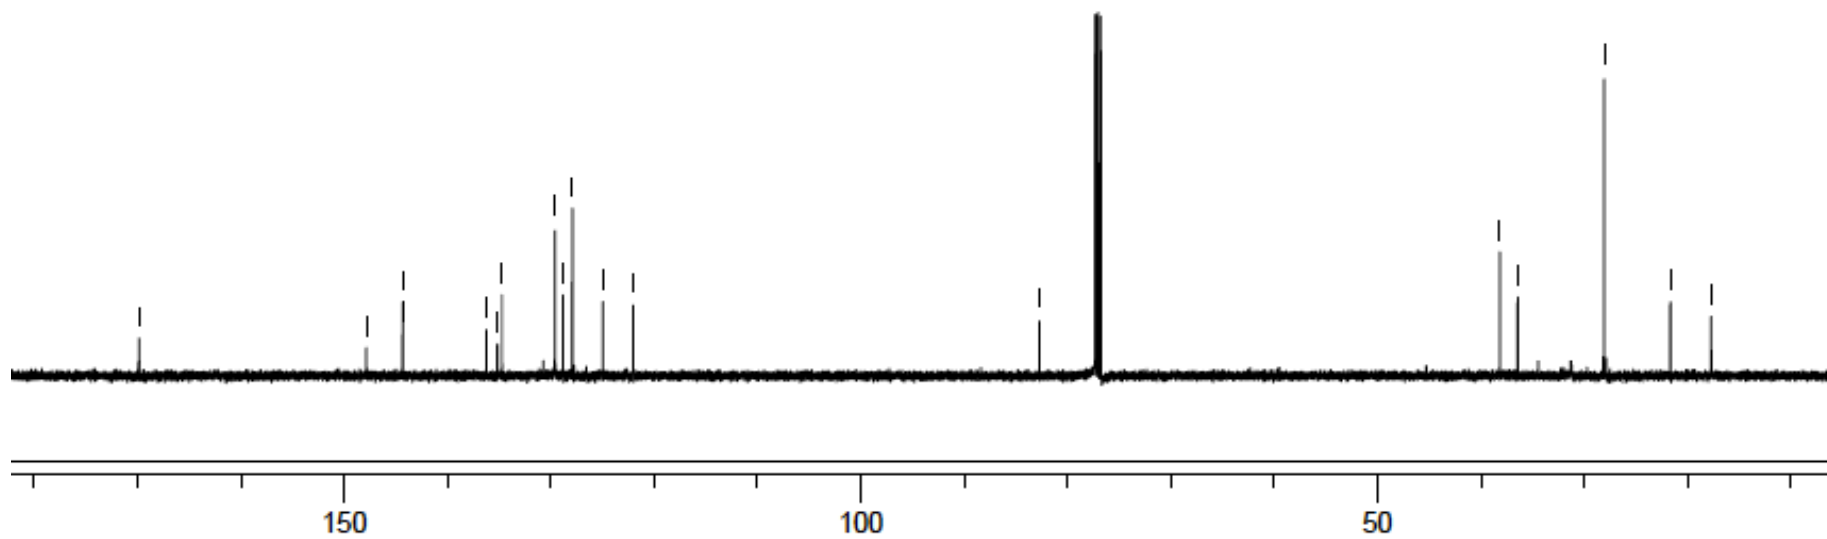

XC-IX-84-10%-WHELK1ml

C:\EZStart\Projects\Default\Data\XC-IX-84-10%-WHELK1ml

C:\EZStart\Projects\Default\Method\XC-Whelk10%1ml.met

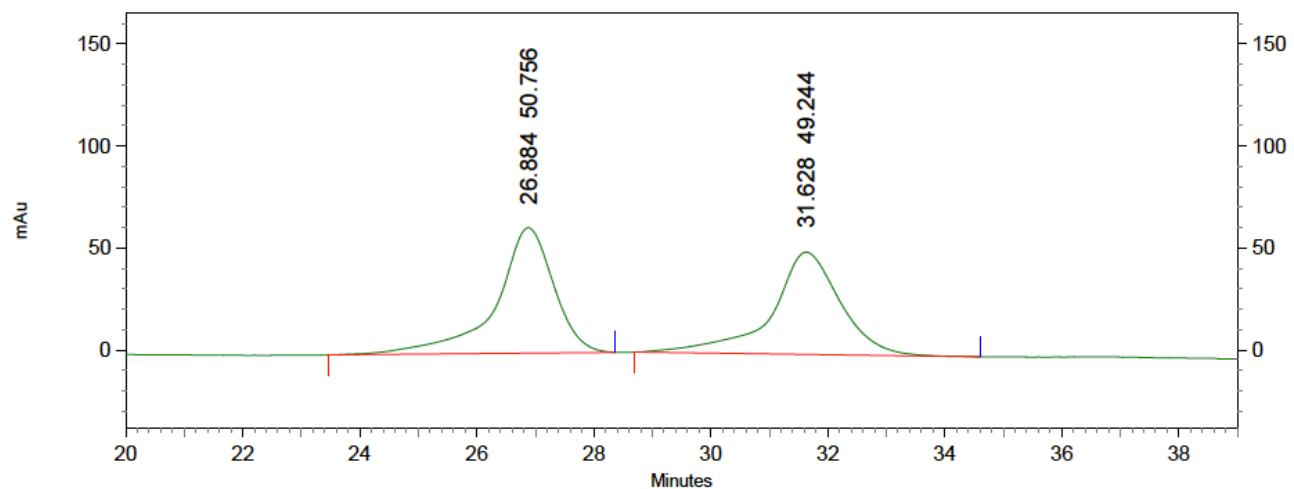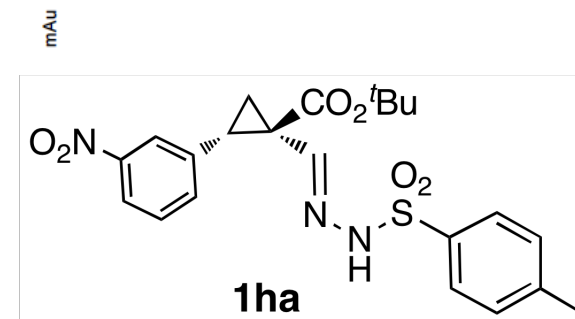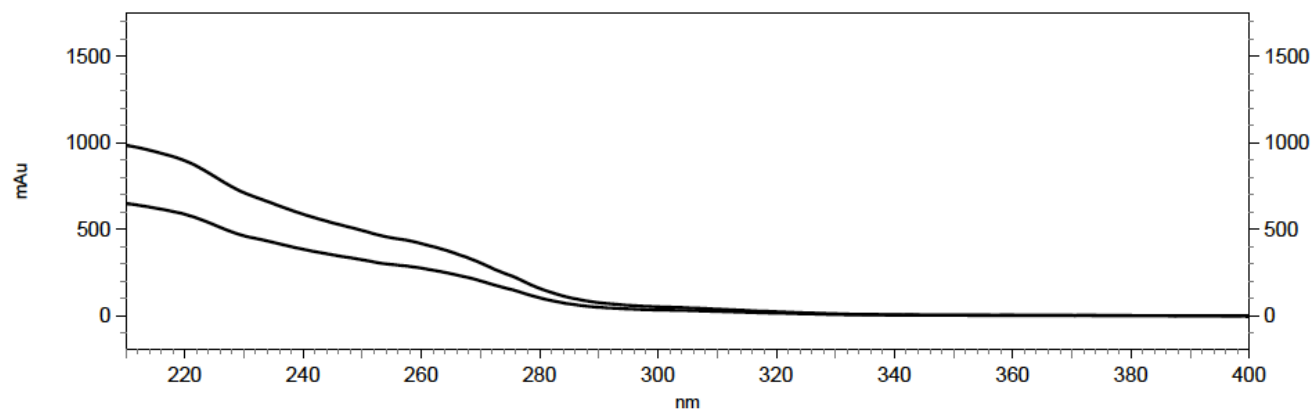

8: 230 nm, 4 nm Results

| Pk # | Retention Time | Area Percent |
|------|----------------|--------------|
| 1    | 26.884         | 50.756       |
| 2    | 31.628         | 49.244       |

|        |  |         |
|--------|--|---------|
| Totals |  | 100.000 |
|--------|--|---------|

XC-IX-69-10%-WHELK1ml

C:\EZStart\Projects\Default\Data\XC-IX-69-10%-WHELK1ml

C:\EZStart\Projects\Default\Method\XC-Whelk10%1ml.met

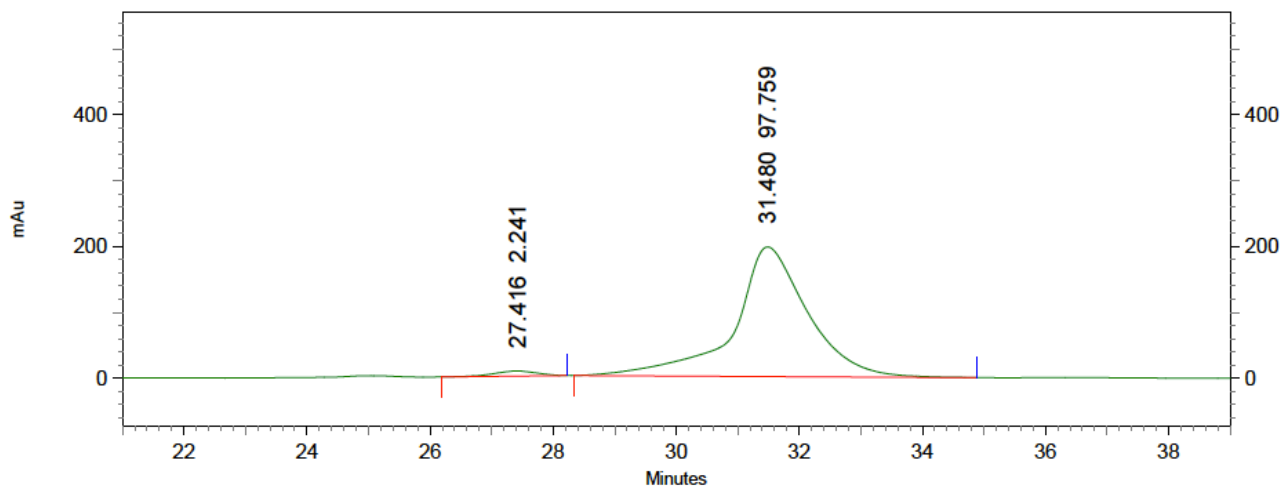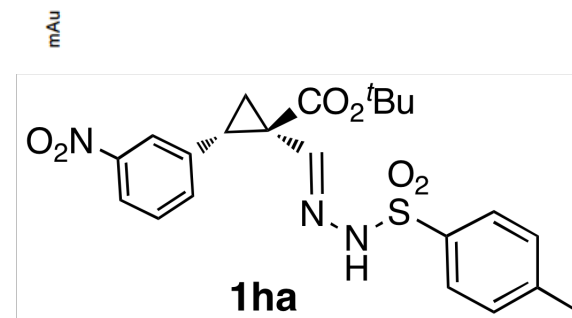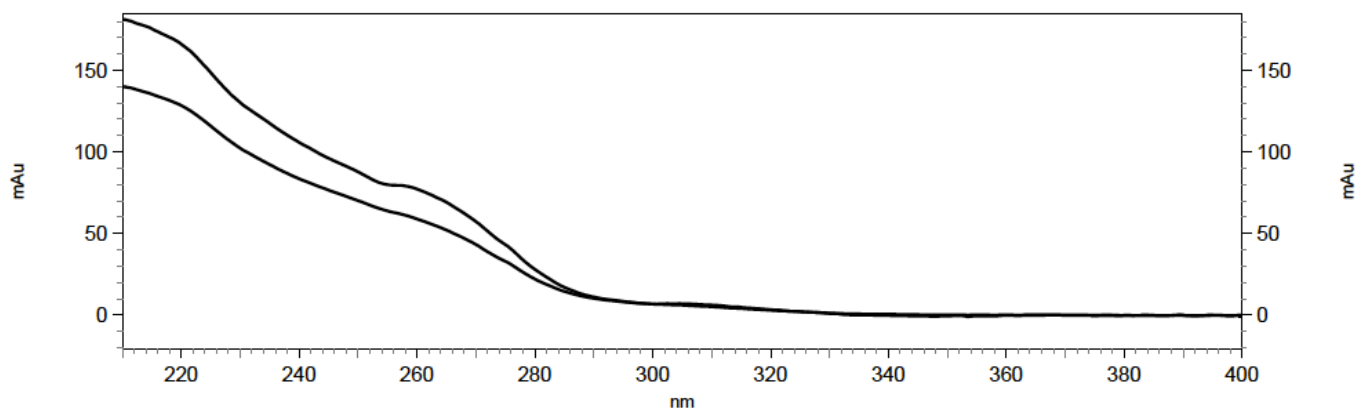

8: 239 nm, 4 nm Results

| Pk # | Retention Time | Area Percent |
|------|----------------|--------------|
| 1    | 27.416         | 2.241        |
| 2    | 31.480         | 97.759       |

|        |  |         |
|--------|--|---------|
| Totals |  | 100.000 |
|--------|--|---------|

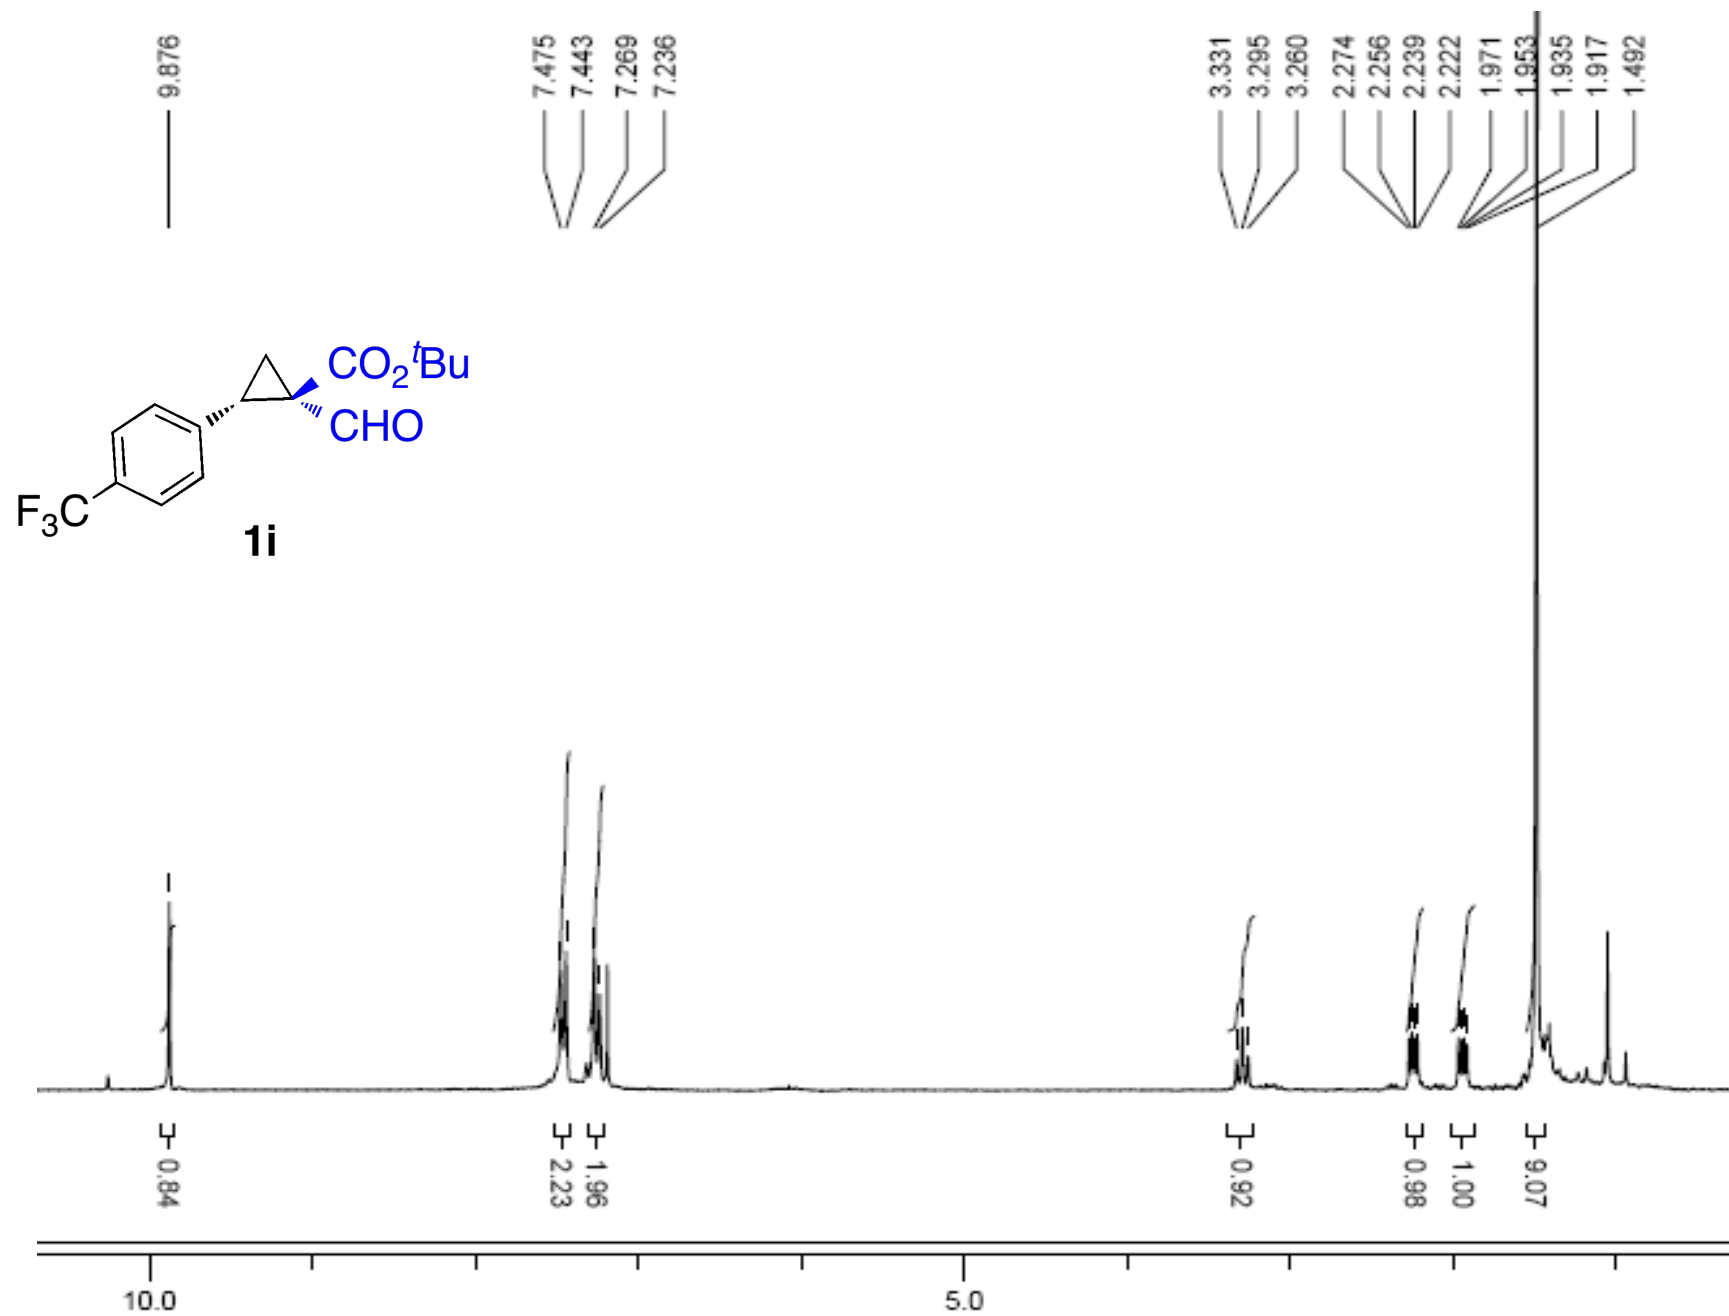

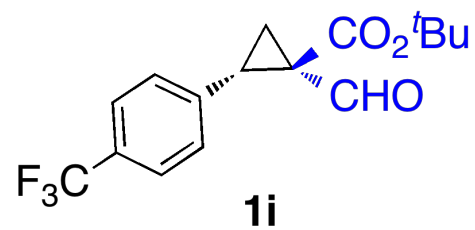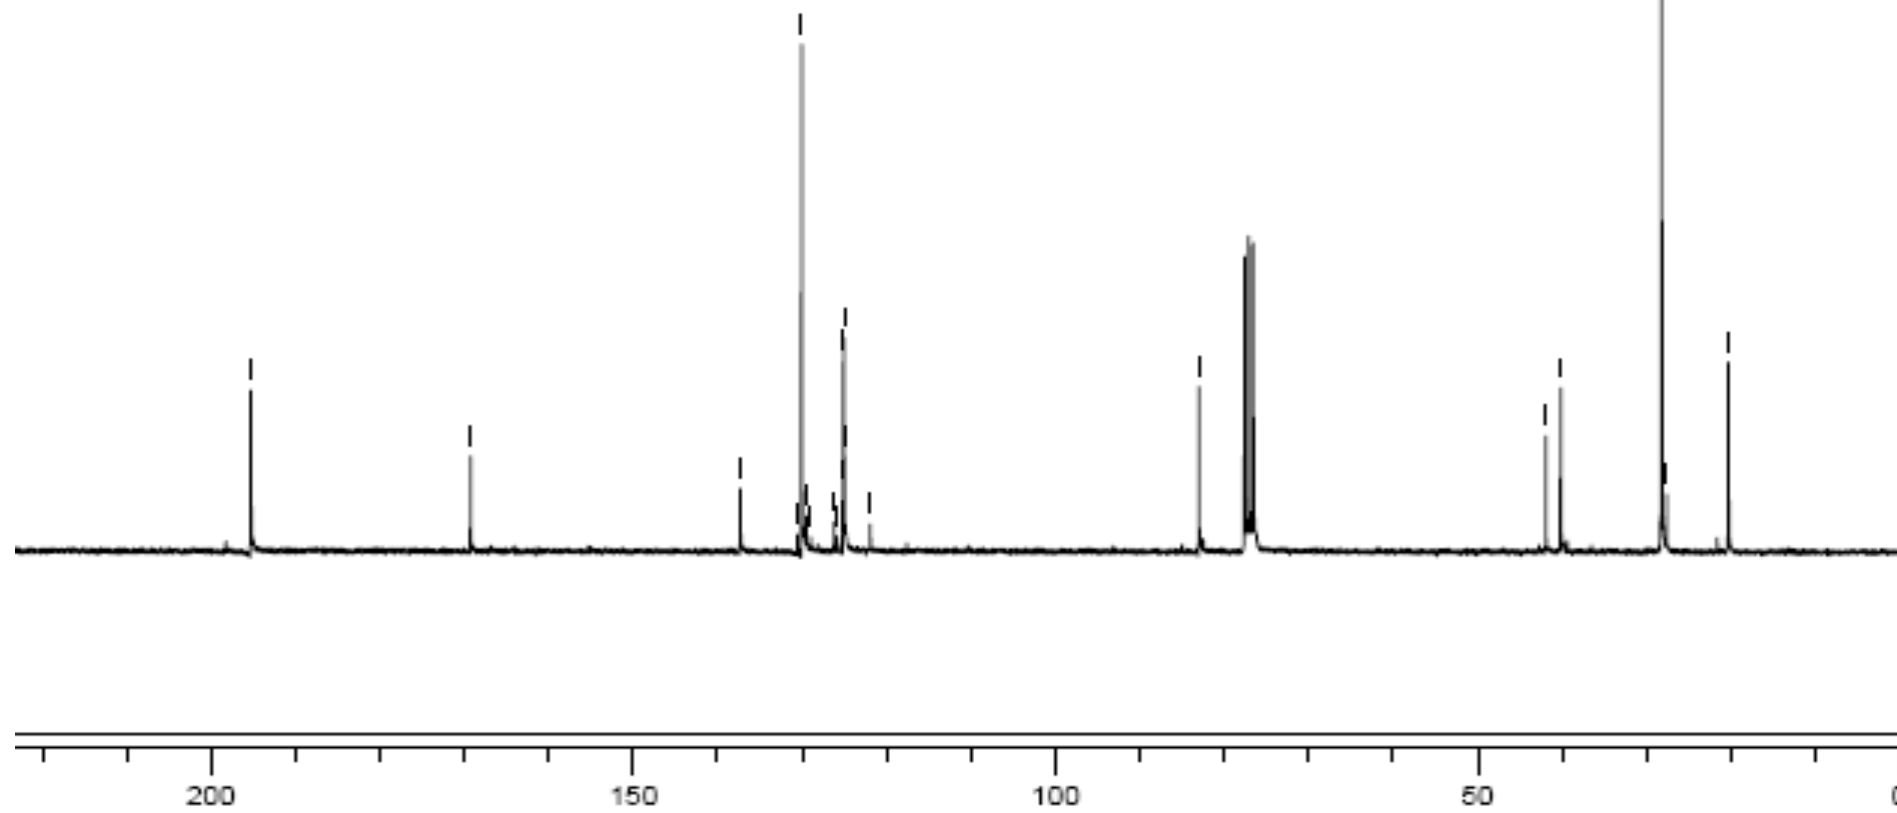



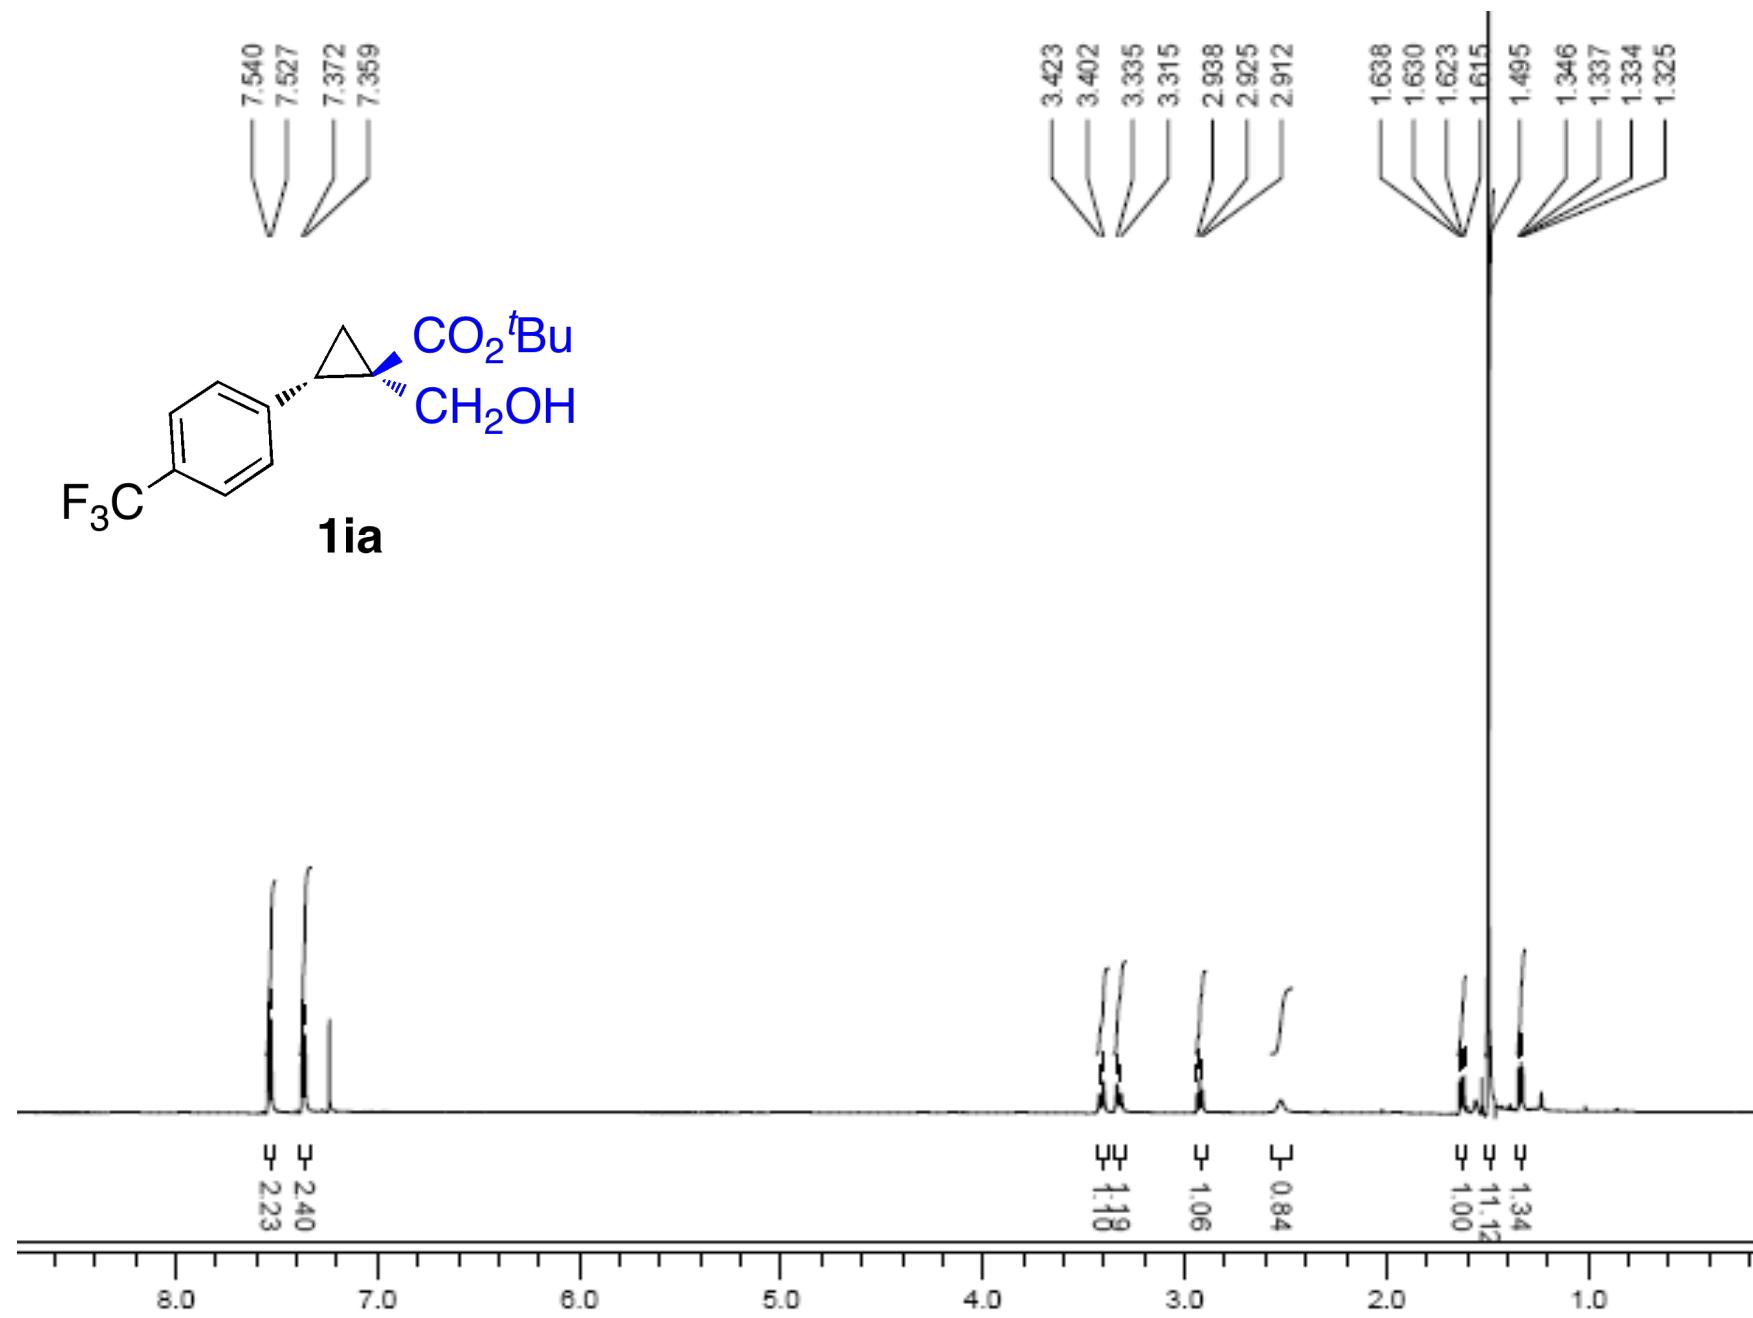

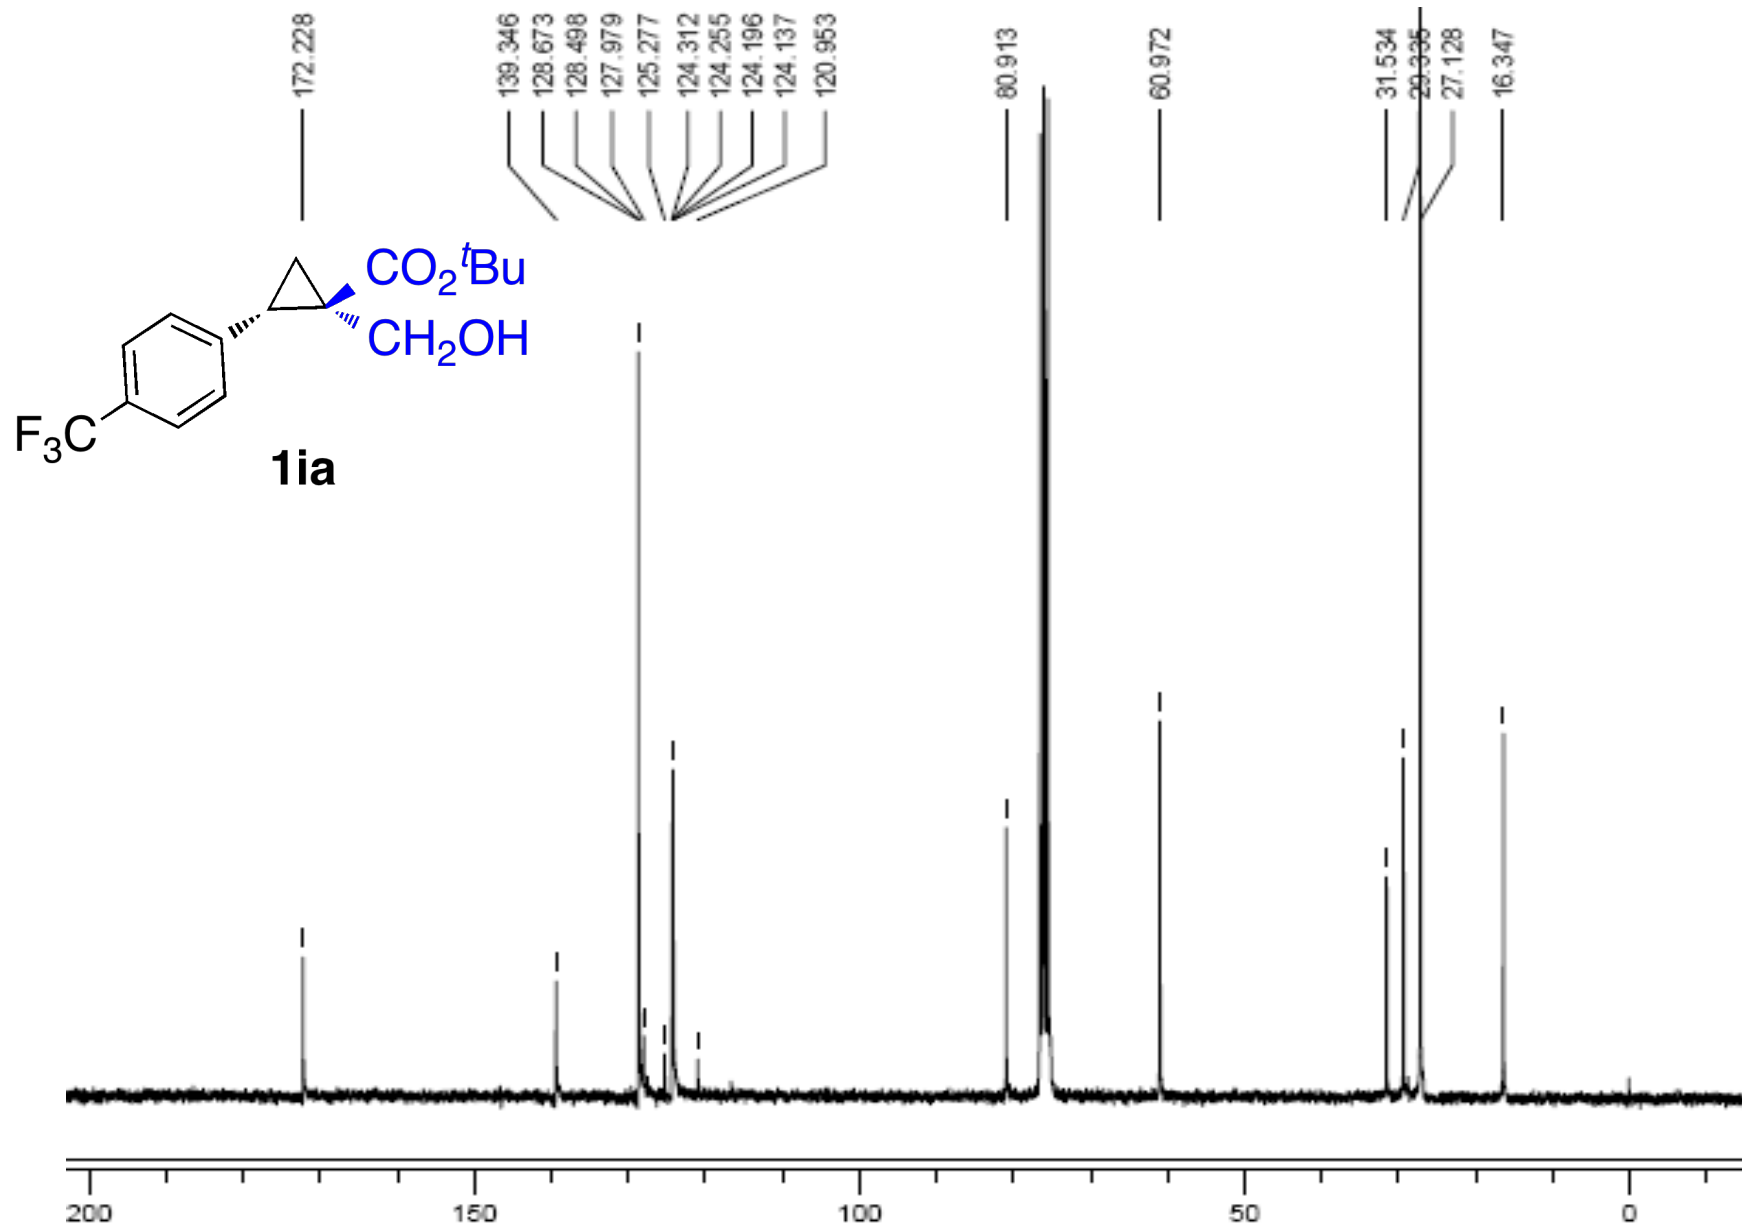

xx-vii-294 ADH 1%@0.8 ml

C:\EZStart\Projects\Default\Method\JRT-WK-1%1ML90MIN.met

C:\EZStart\Projects\Default\Data\xx-vii-294 ADH 1%@0.8 ml

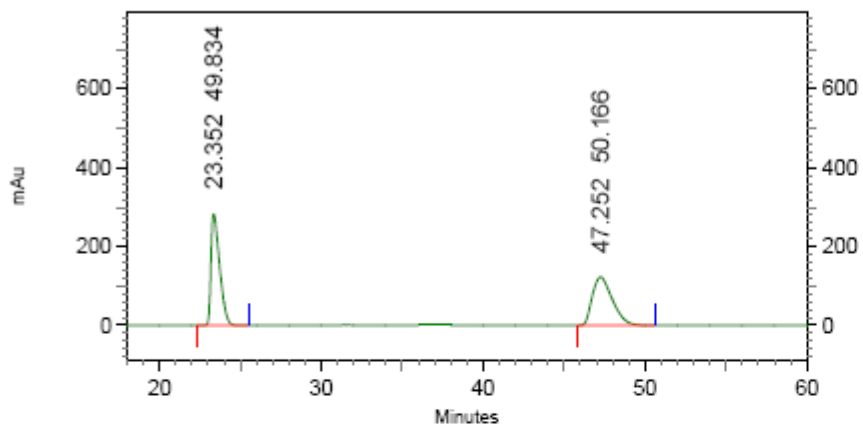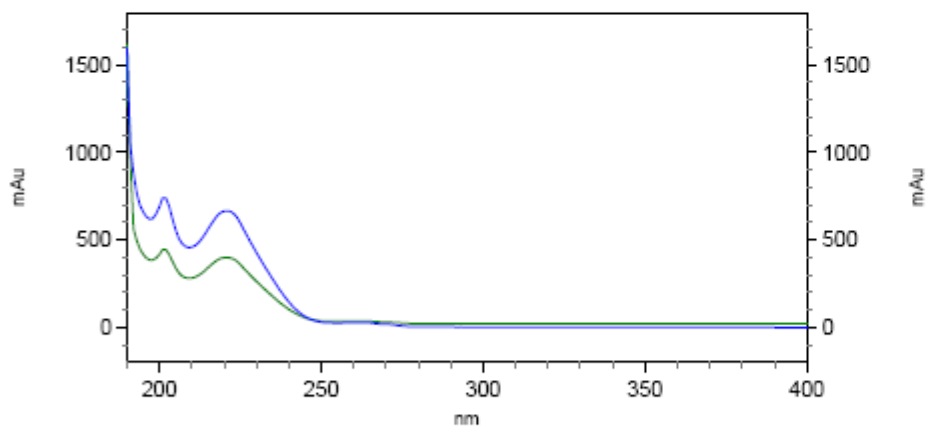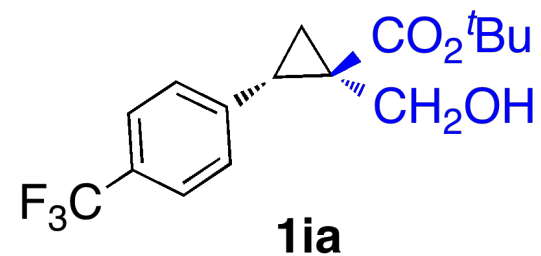

3: 227 nm, 4 nm

Results

| Pk #   | Name | Retention Time | Area Percent |
|--------|------|----------------|--------------|
| 1      |      | 23.352         | 49.834       |
| 2      |      | 47.252         | 50.166       |
| Totals |      |                | 100.000      |

xx-vii-300 ADH 1%@0.8 ml

C:\EZStart\Projects\Default\Method\Shifa-P-Cyclopropane 1%Whelk.met

C:\EZStart\Projects\Default\Data\xx-vii-300 ADH 1%@0.8 ml

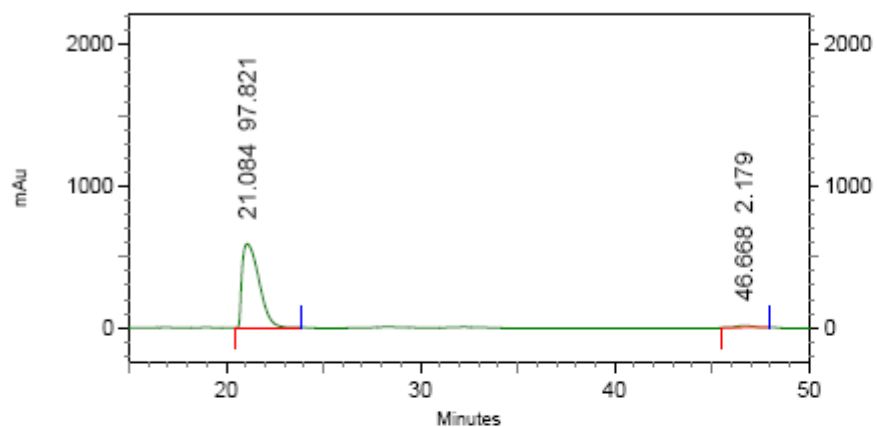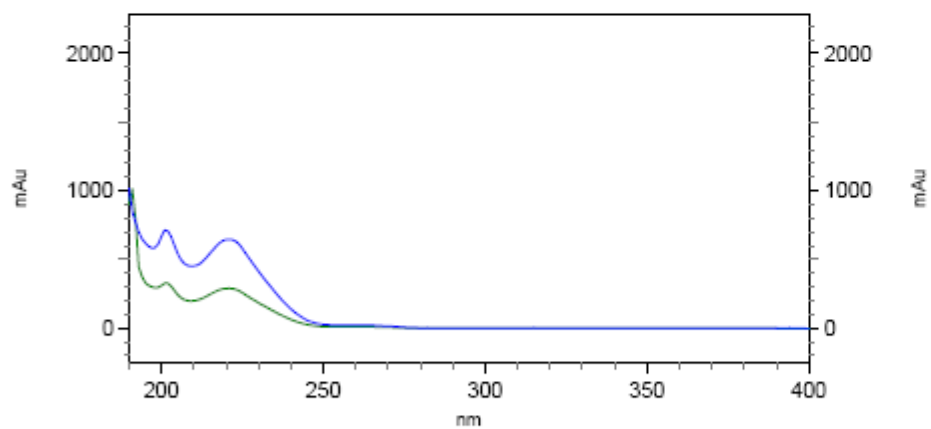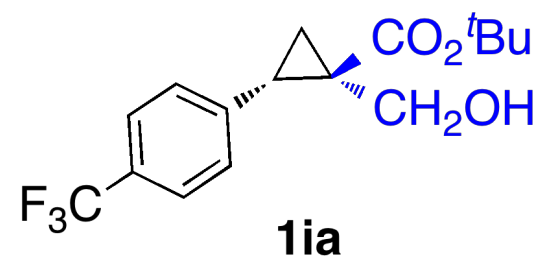

2: 225 nm, 4 nm

Results

| Pk #   | Name | Retention Time | Area Percent |
|--------|------|----------------|--------------|
| 1      |      | 21.084         | 97.821       |
| 2      |      | 46.668         | 2.179        |
| Totals |      |                | 100.000      |

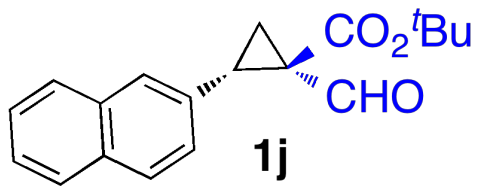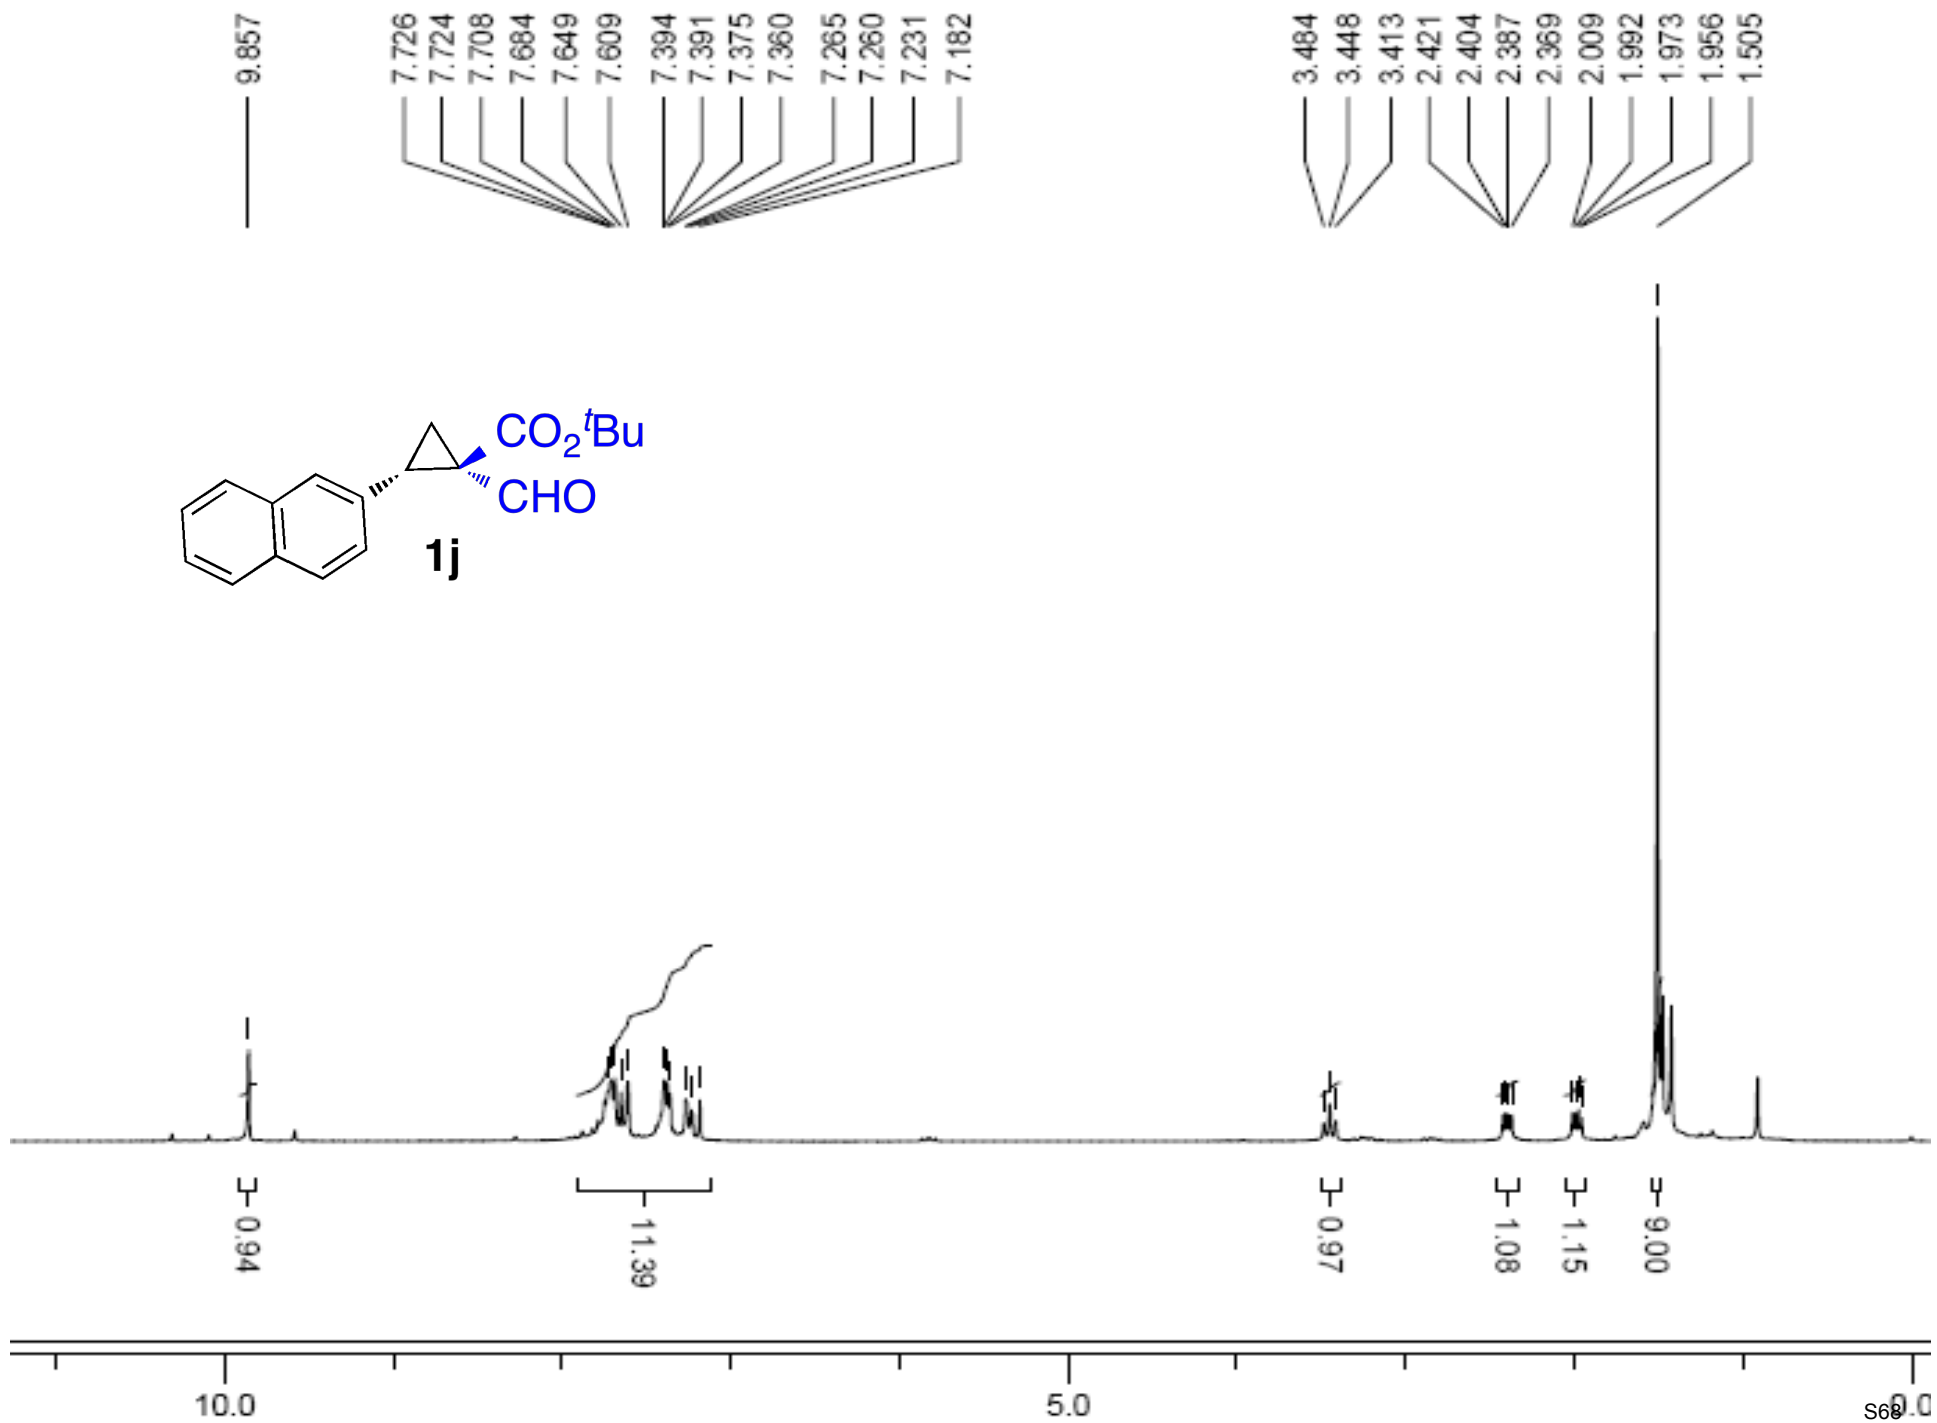

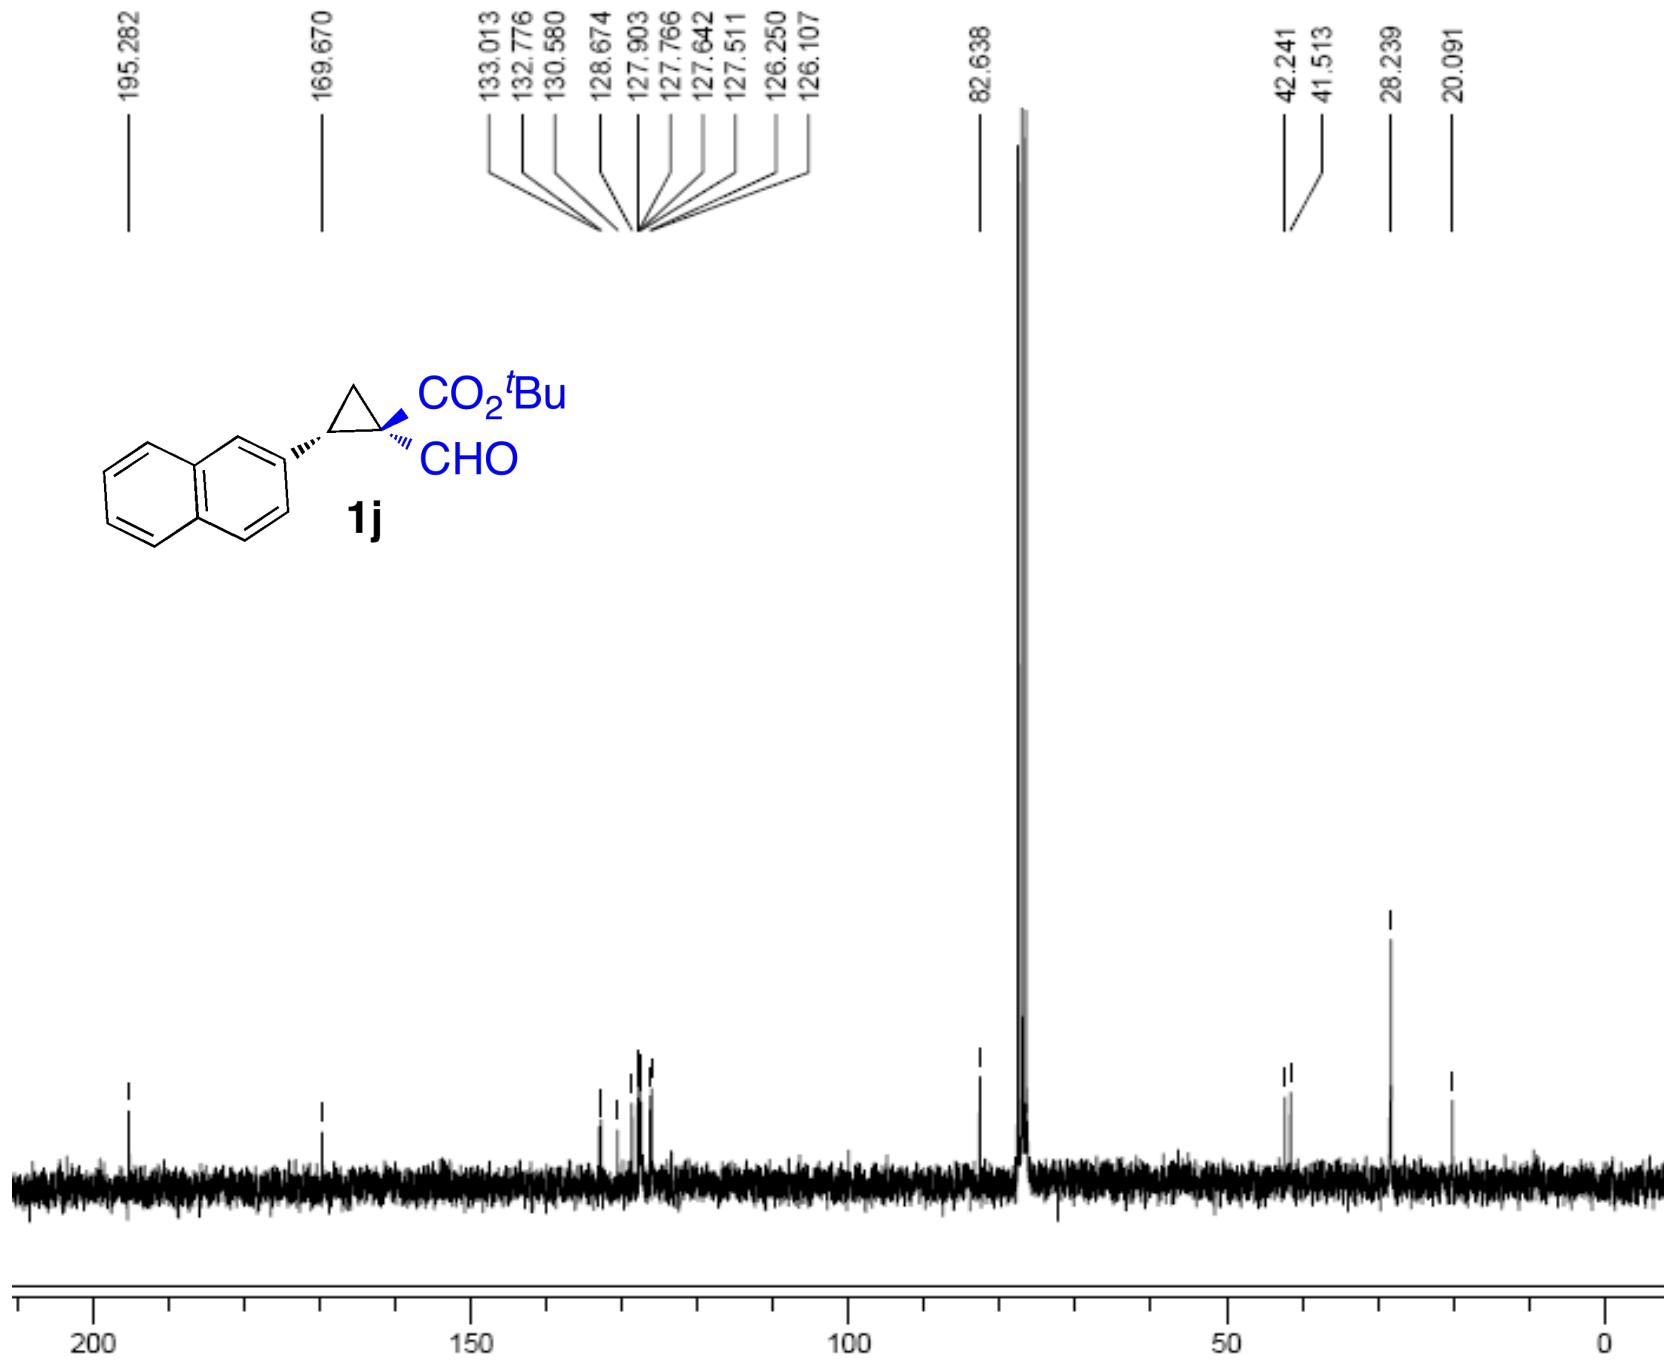

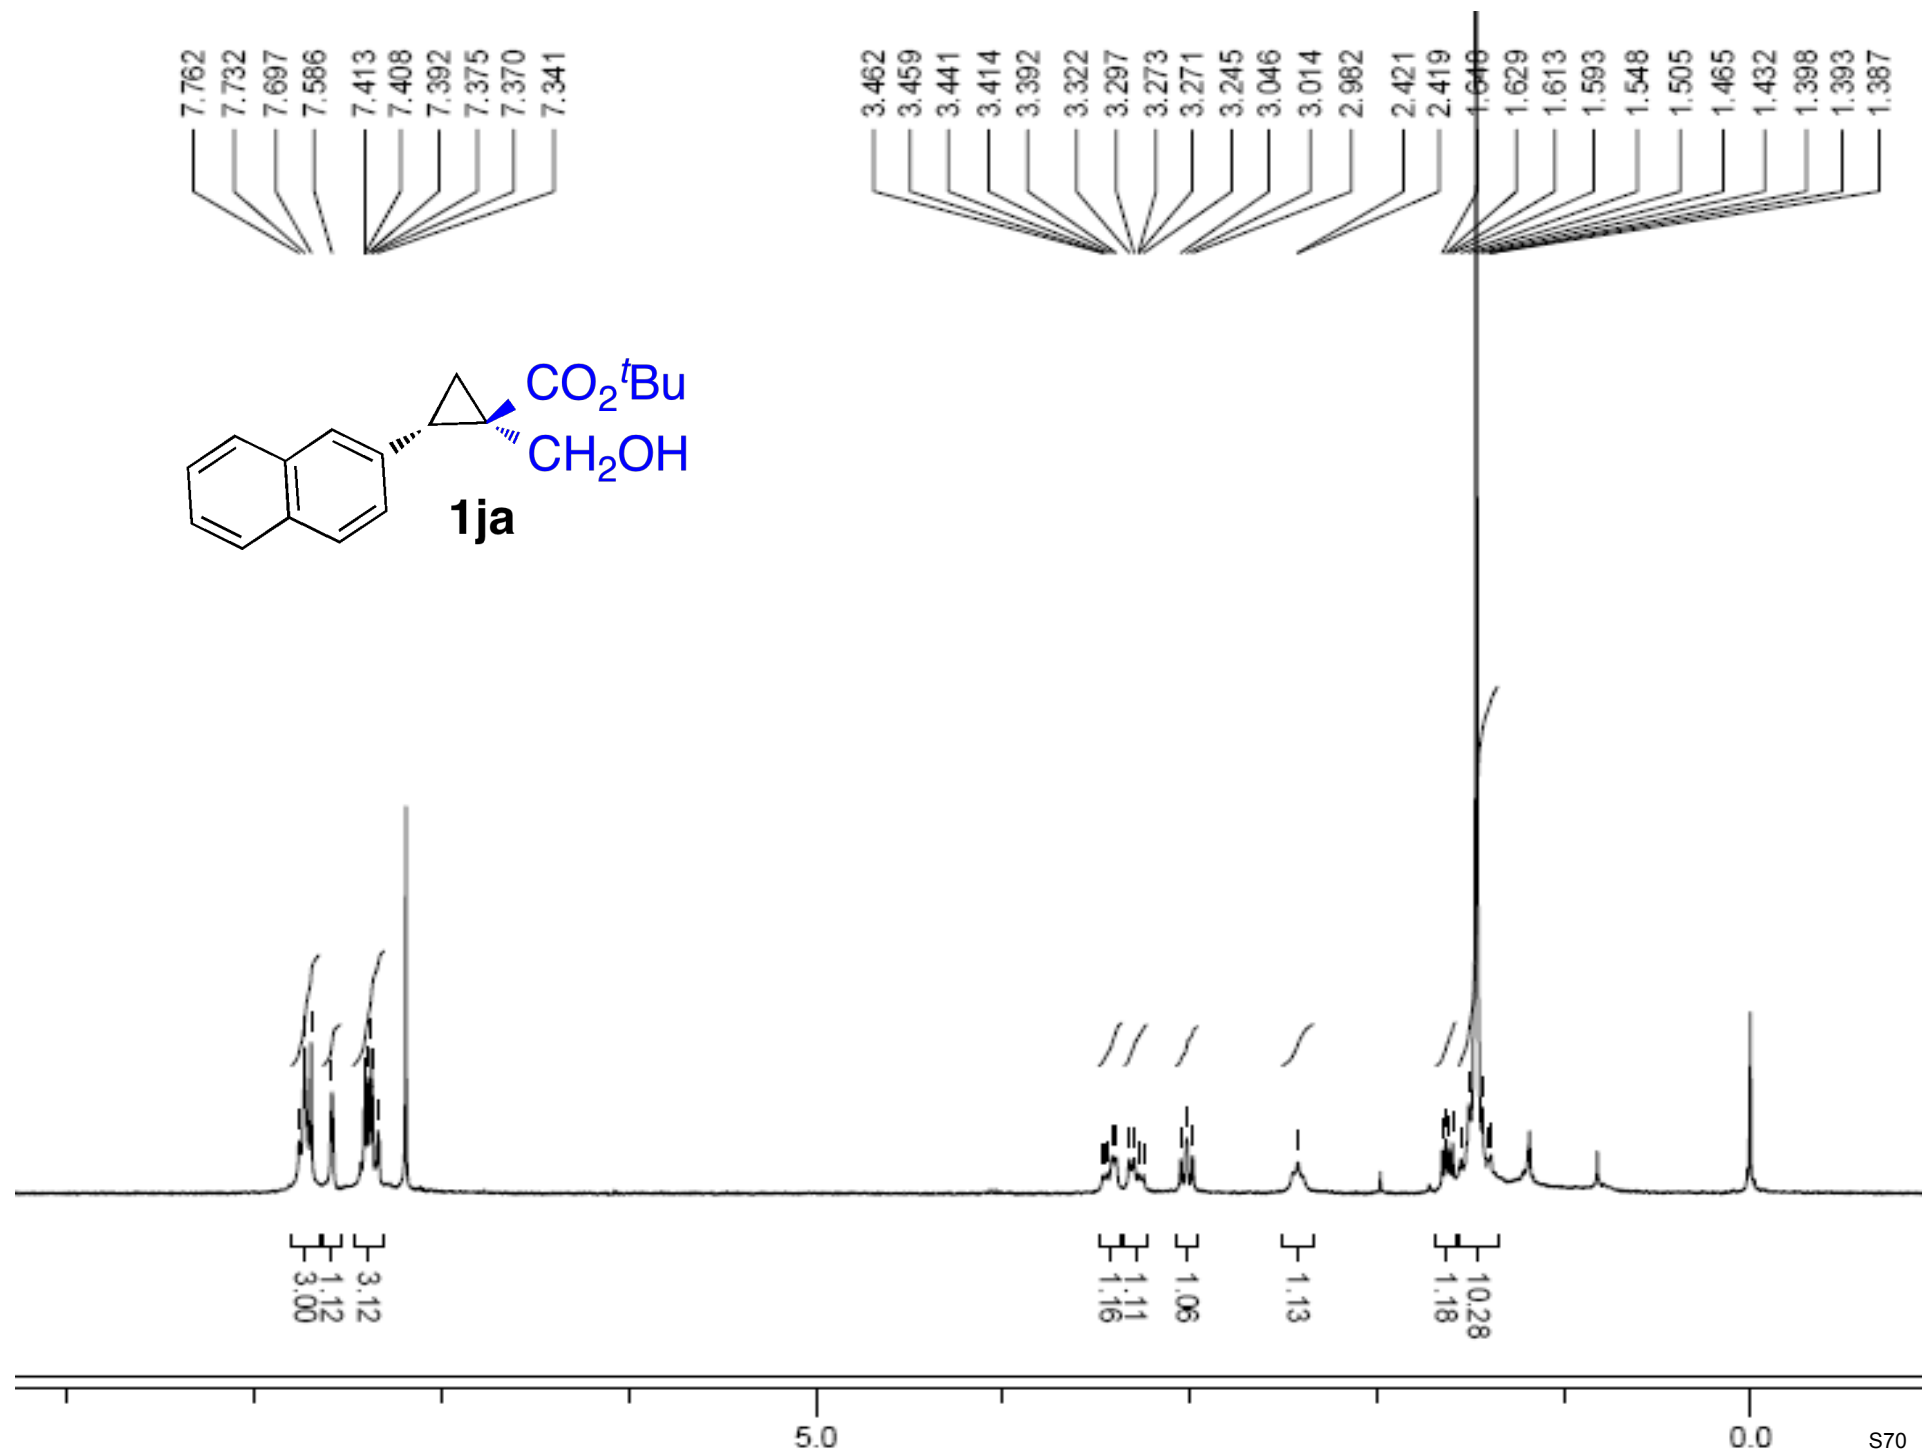

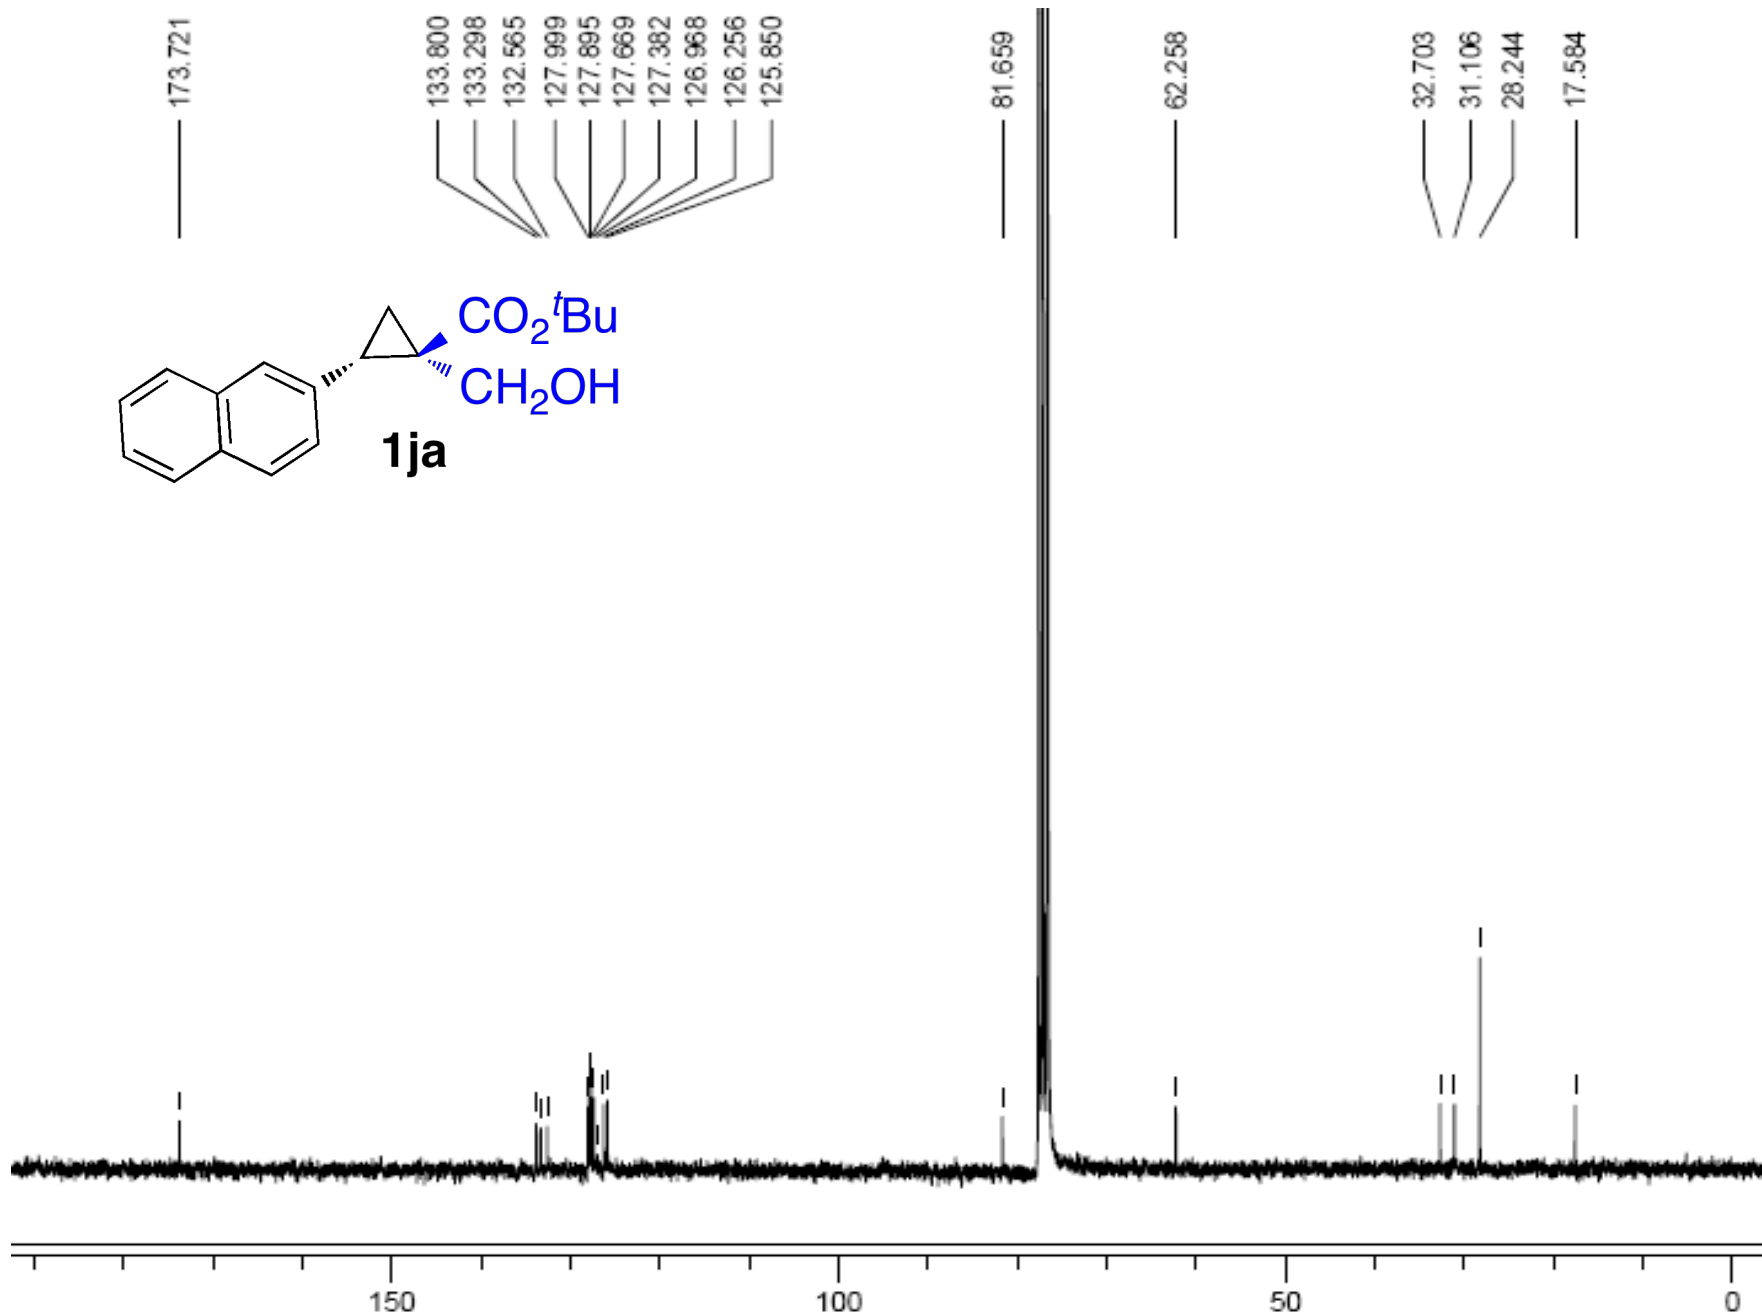



xx-vi-137 ODH 3%@0.8 ml  
 C:\EZStart\Projects\Default\Method\Shifa-EDA.met  
 C:\EZStart\Projects\Default\Data\xx-vi-137 ODH 3%@0.8 ml

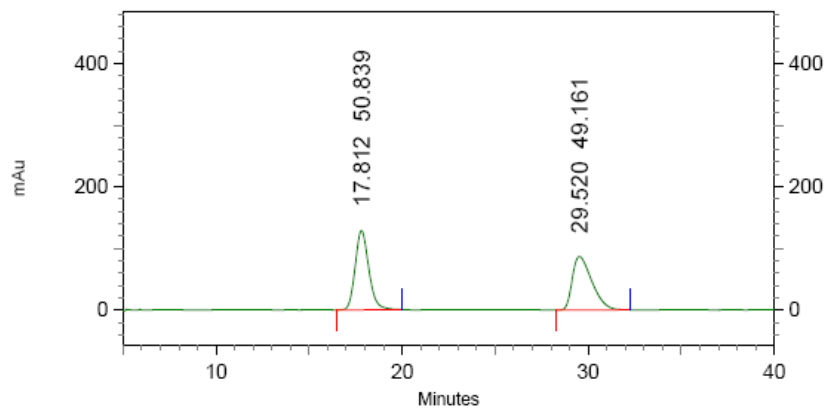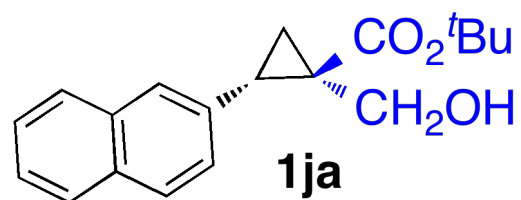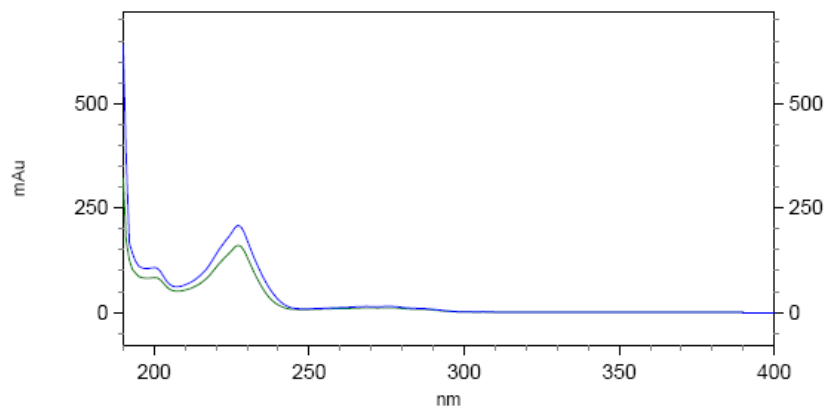

2: 254 nm, 4 nm

Results

| Pk #   | Name | Retention Time | Area Percent |
|--------|------|----------------|--------------|
| 1      |      | 17.812         | 50.839       |
| 2      |      | 29.520         | 49.161       |
| Totals |      |                | 100.000      |

xx-vi-139 ODH 3%@0.8 ml  
 C:\EZStart\Projects\Default\Method\Shifa-EDA.met  
 C:\EZStart\Projects\Default\Data\xx-vi-139 ODH 3%@0.8 ml

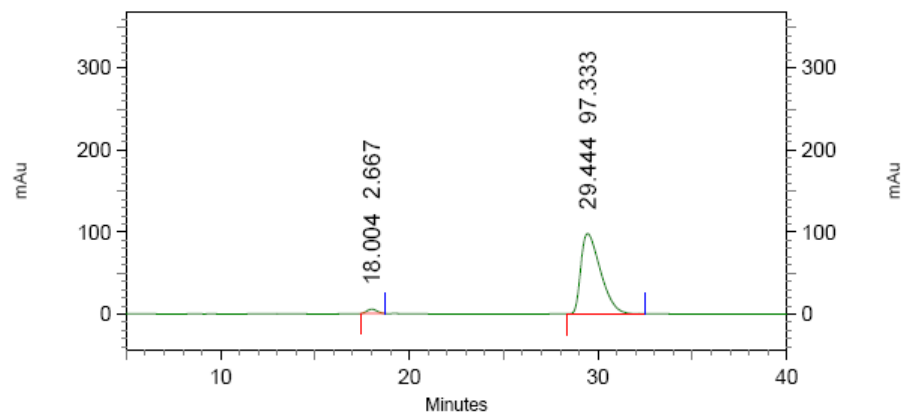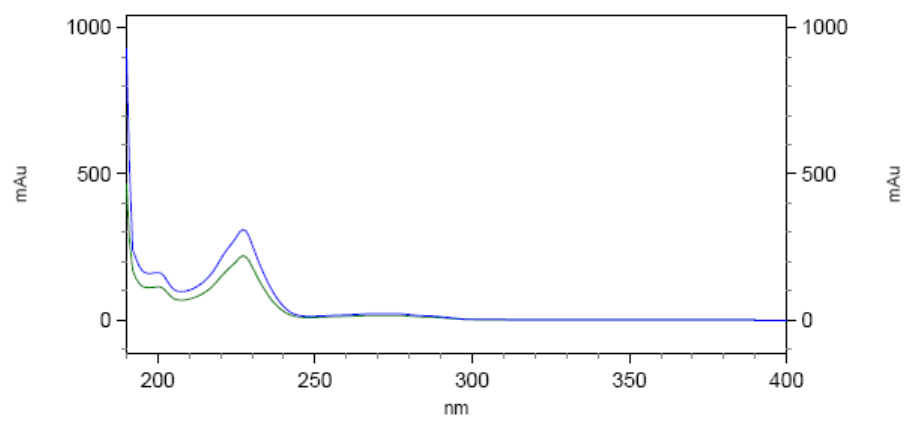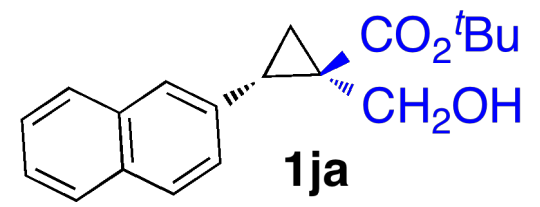

2: 254 nm, 4 nm  
 Results

| Pk #   | Name | Retention Time | Area Percent |
|--------|------|----------------|--------------|
| 1      |      | 18.004         | 2.667        |
| 2      |      | 29.444         | 97.333       |
| Totals |      |                | 100.000      |

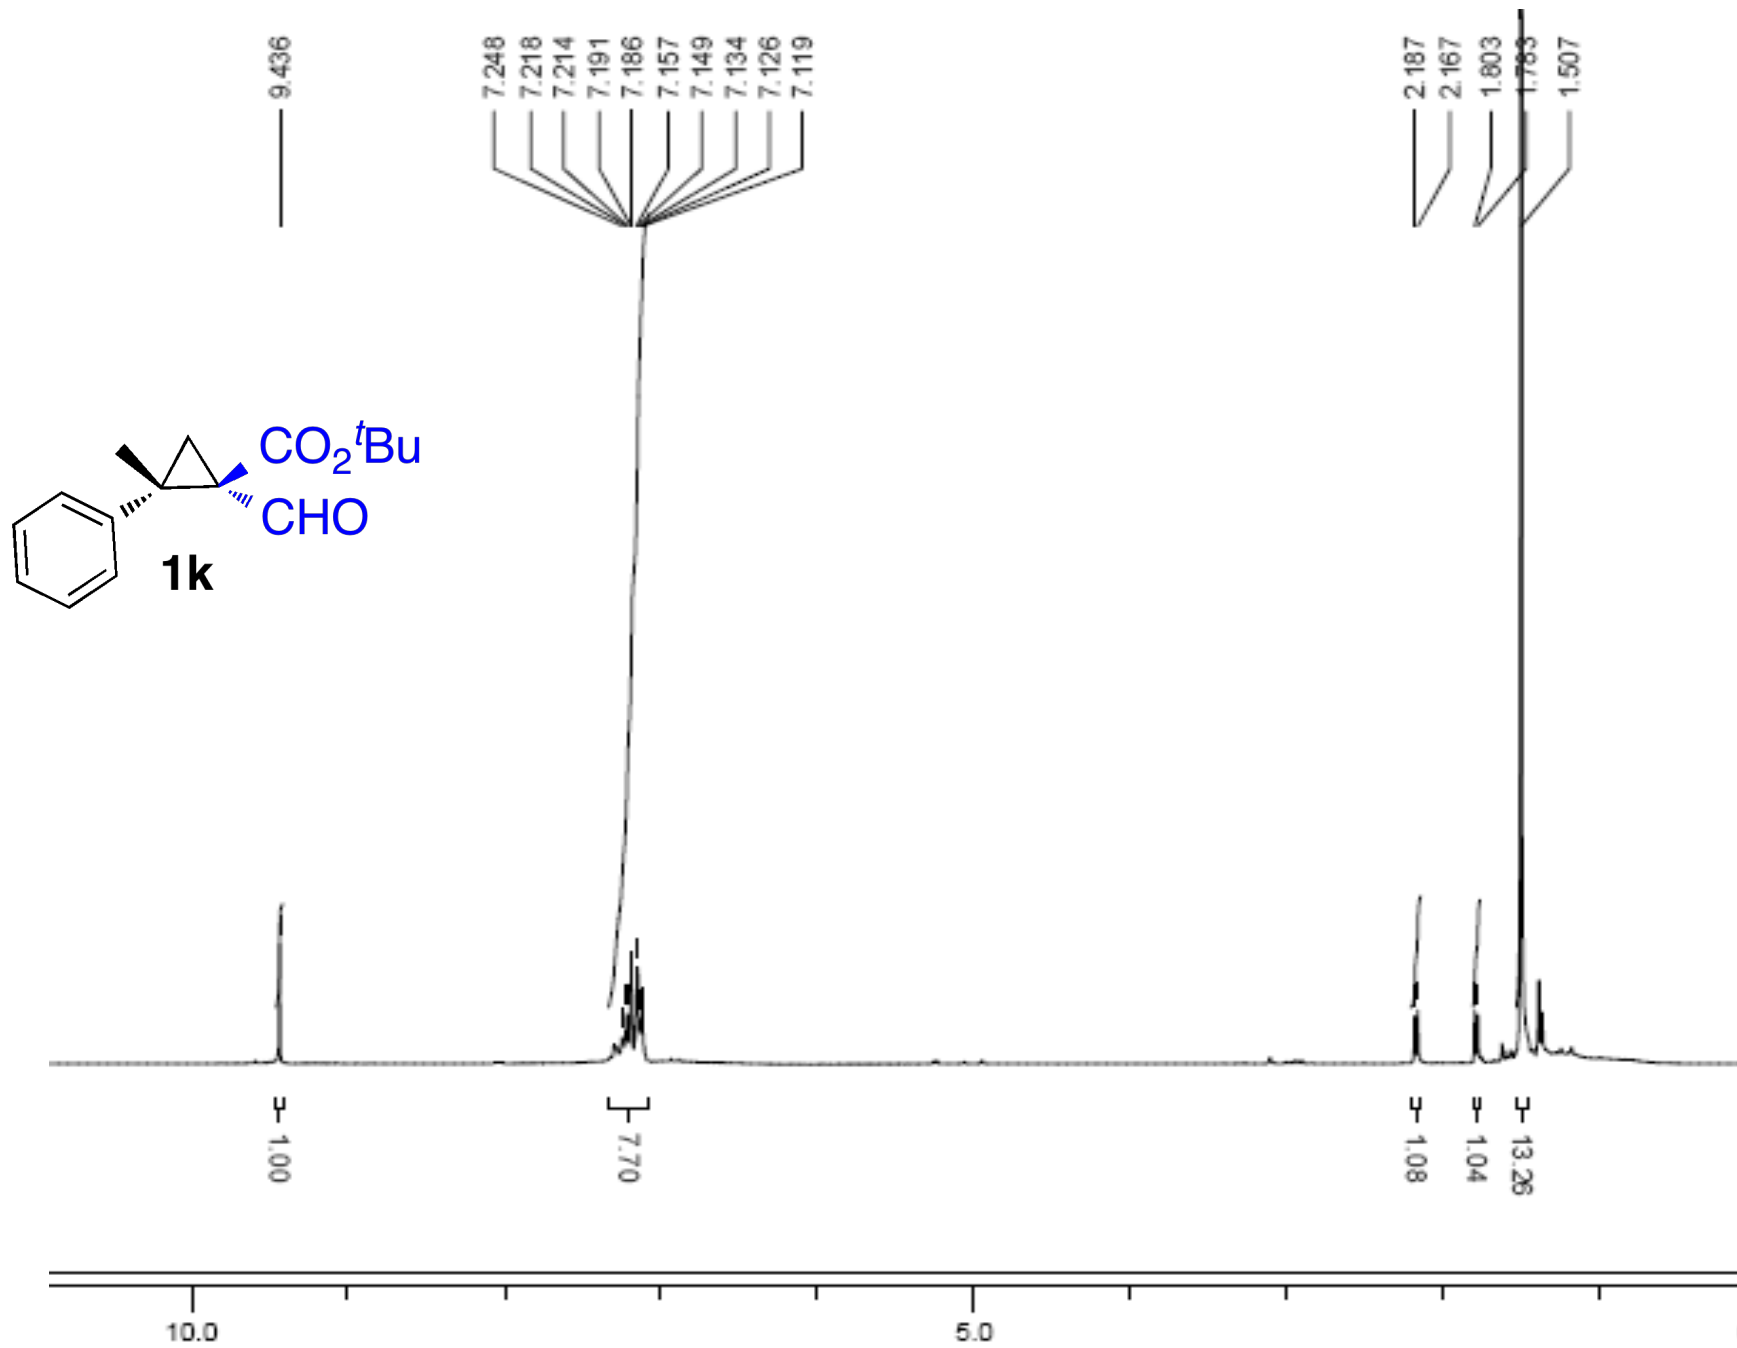

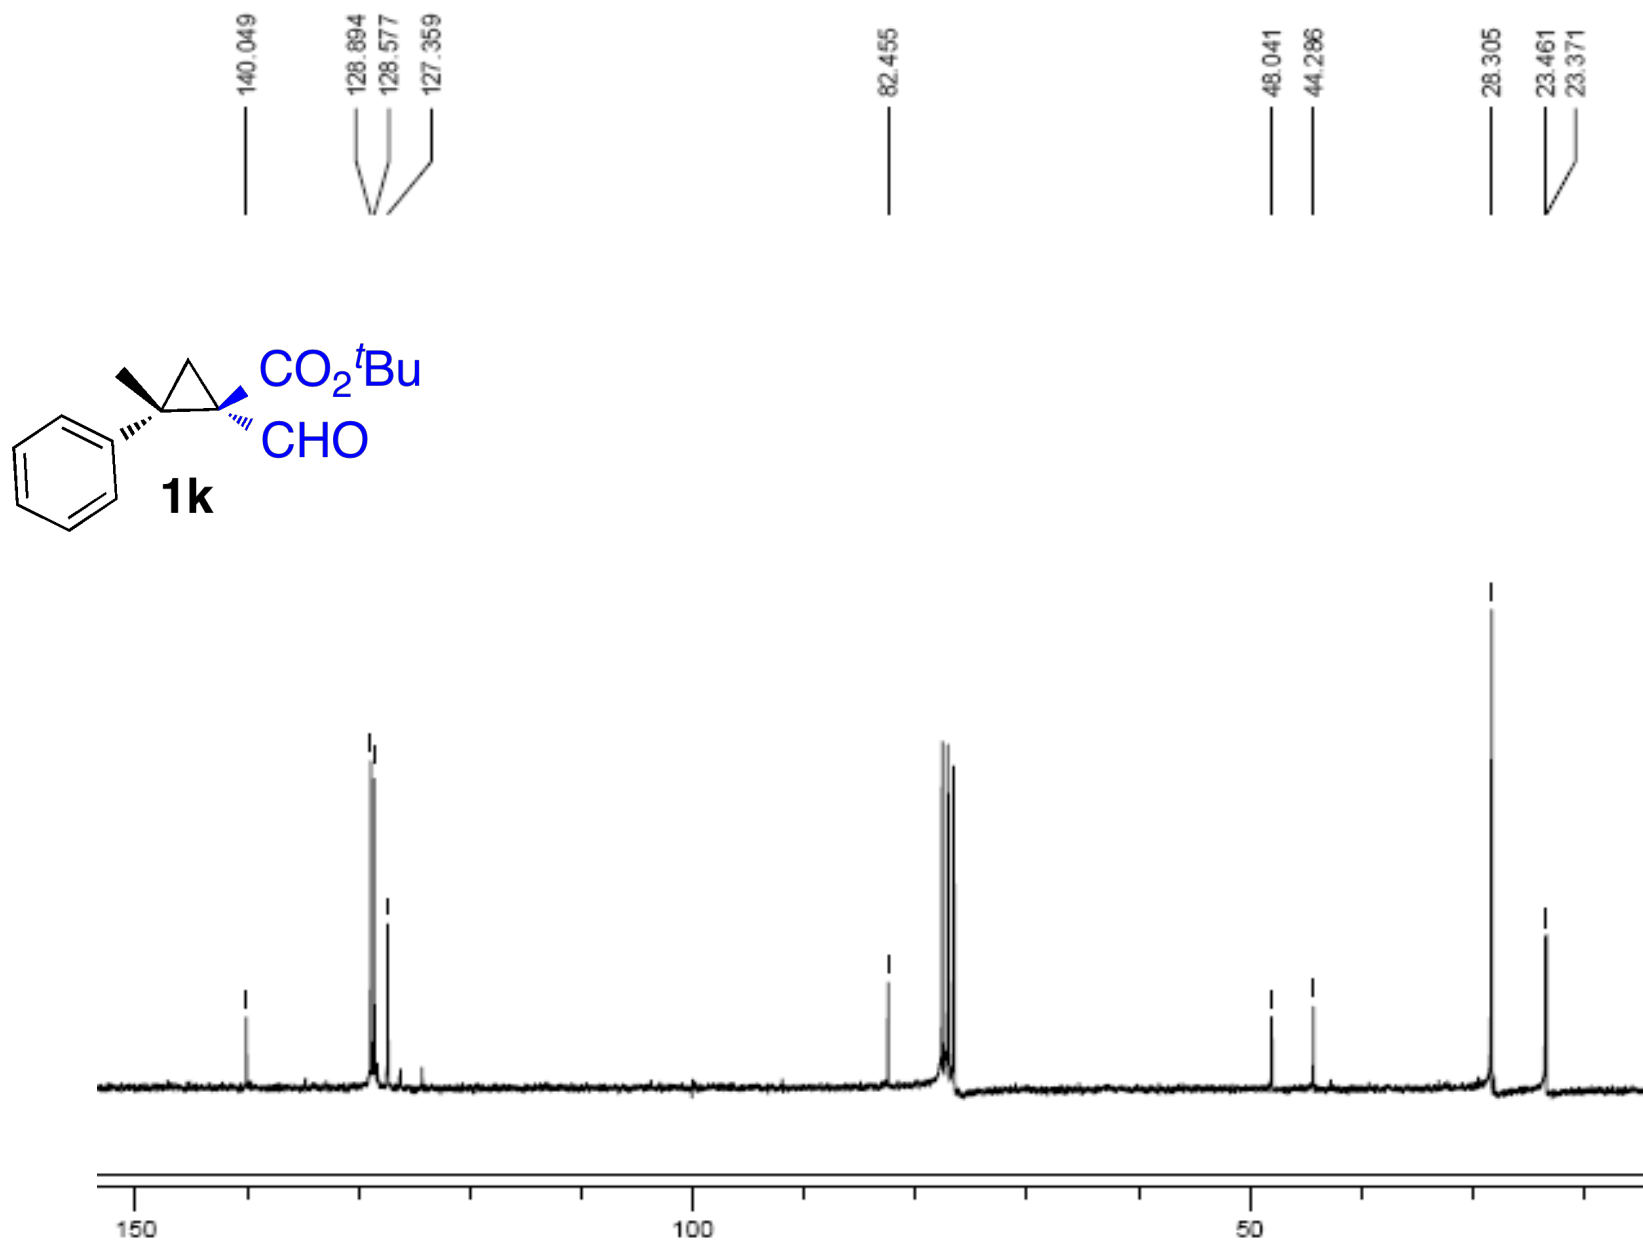

xx-vii-298 wheelk 2%@0.8 ml

C:\EZStart\Projects\Default\Method\Shifa 4-t-Butylbenzene (OD-H 10-90).met

C:\EZStart\Projects\Default\Data\xx-vii-298 wheelk 2%@0.8 ml

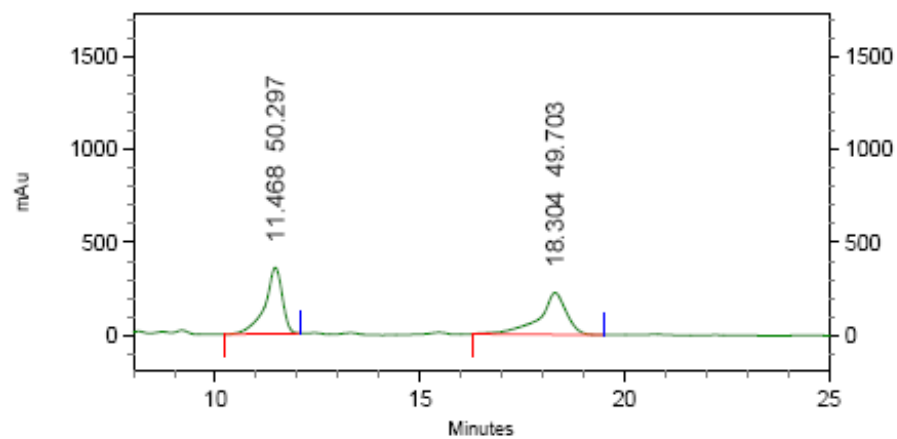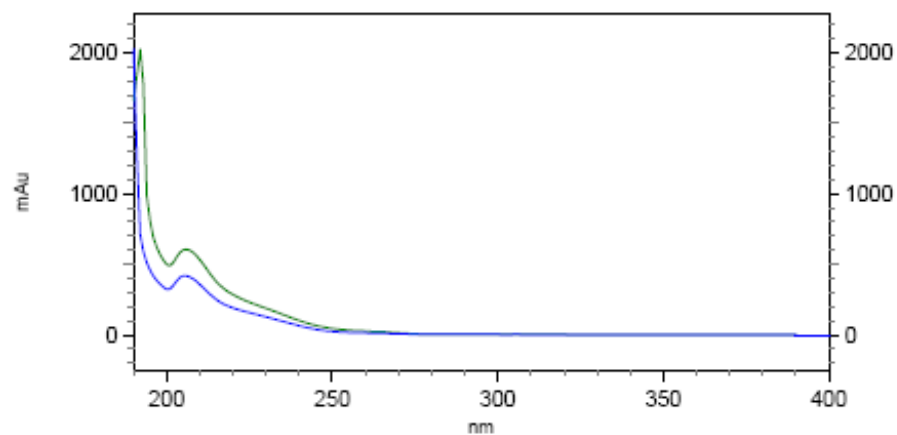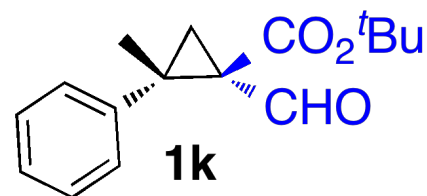

4: 219 nm, 4 nm

Results

| Pk # | Name | Retention Time | Area Percent |
|------|------|----------------|--------------|
| 1    |      | 11.468         | 50.297       |
| 2    |      | 18.304         | 49.703       |

|        |  |  |         |
|--------|--|--|---------|
| Totals |  |  | 100.000 |
|--------|--|--|---------|

xx-vii-297 wheelk 2%@0.8 ml

C:\EZStart\Projects\Default\Method\Shifa 4-t-Butylbenzene (OD-H 10-90).met

C:\EZStart\Projects\Default\Data\xx-vii-297 wheelk 2%@0.8 ml

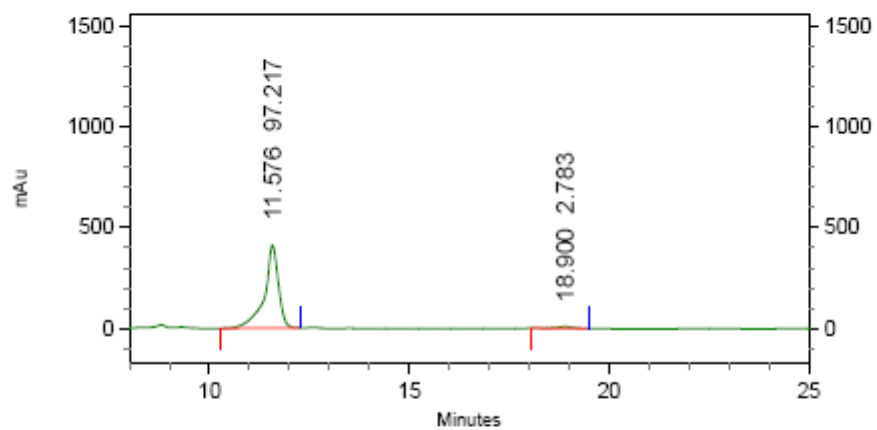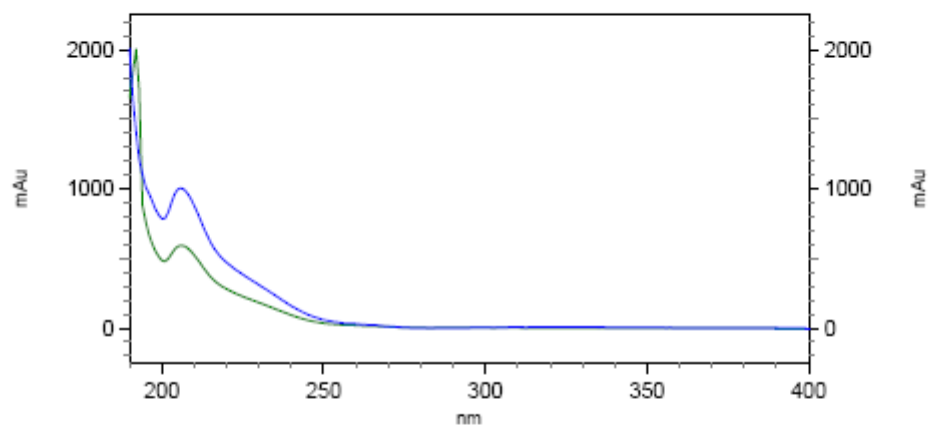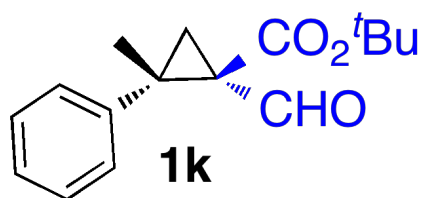

4: 219 nm, 4 nm

Results

| Pk #   | Name | Retention Time | Area Percent |
|--------|------|----------------|--------------|
| 1      |      | 11.576         | 97.217       |
| 2      |      | 18.900         | 2.783        |
| Totals |      |                | 100.000      |

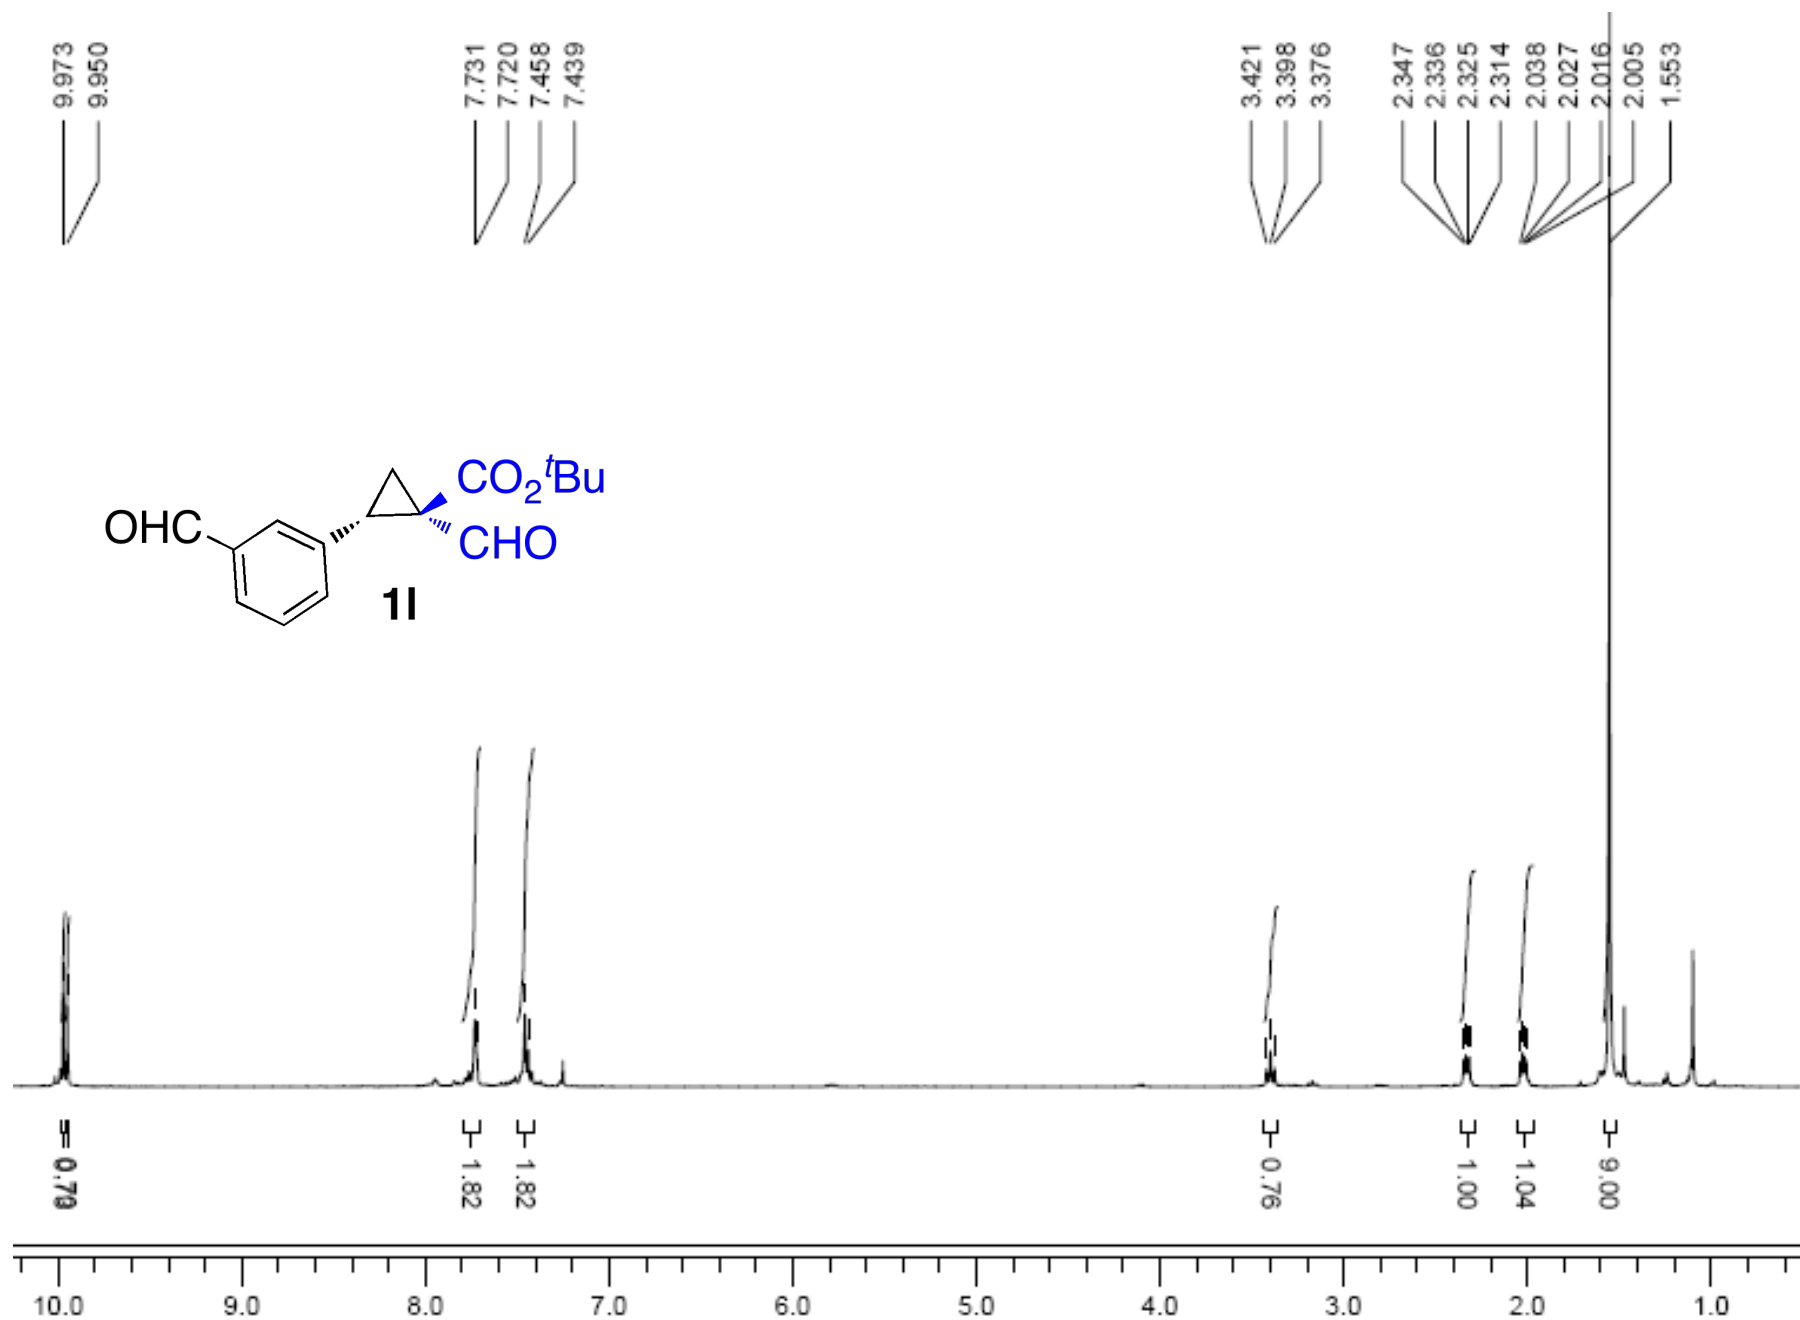

195.394  
192.080

169.199

136.192  
135.515  
134.468  
130.670  
129.273  
128.773

82.891

41.711  
40.183  
28.128  
20.443

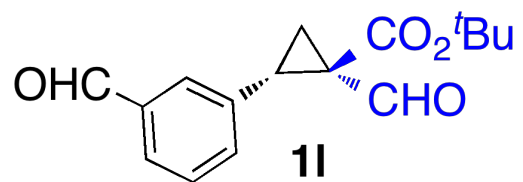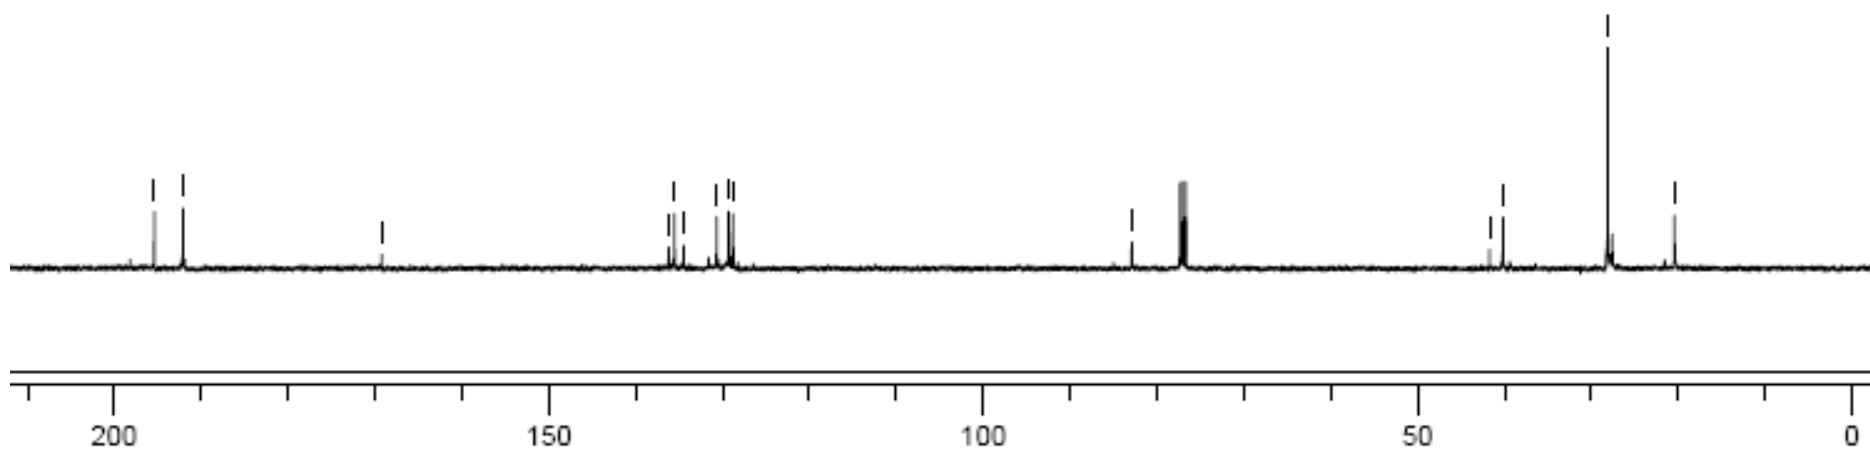



xx-viii-122-1 OJH 5%@1.0 ml

C:\EZStart\Projects\Default\Method\snowtemp short.met

C:\EZStart\Projects\Default\Data\xx-viii-122-1 OJH 5%@1.0 ml

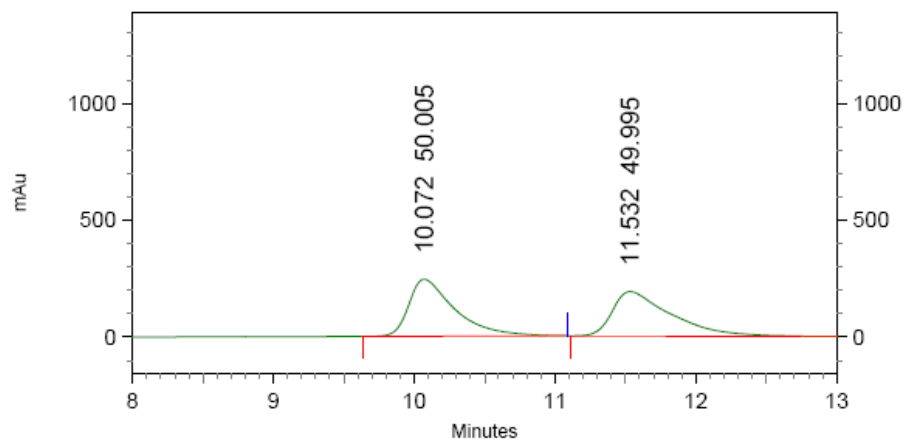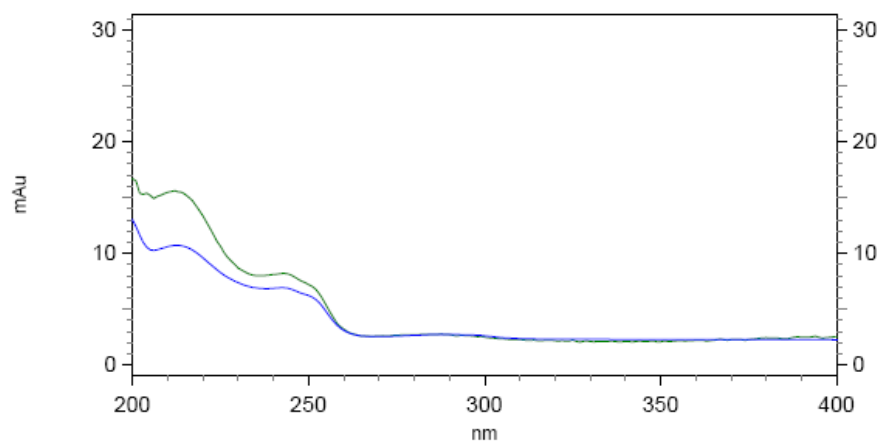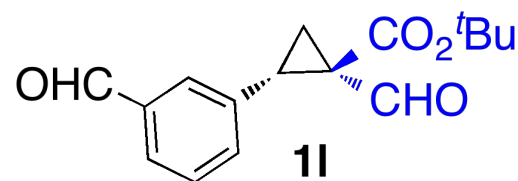

8: 223 nm, 4 nm

Results

| Pk #   | Name | Retention Time | Area Percent |
|--------|------|----------------|--------------|
| 1      |      | 10.072         | 50.005       |
| 2      |      | 11.532         | 49.995       |
| Totals |      |                | 100.000      |

xx-viii-122-2 OJH 5%@1.0 ml  
 C:\EZStart\Projects\Default\Method\snowtemp short.met  
 C:\EZStart\Projects\Default\Data\xx-viii-122-2 OJH 5%@1.0 ml

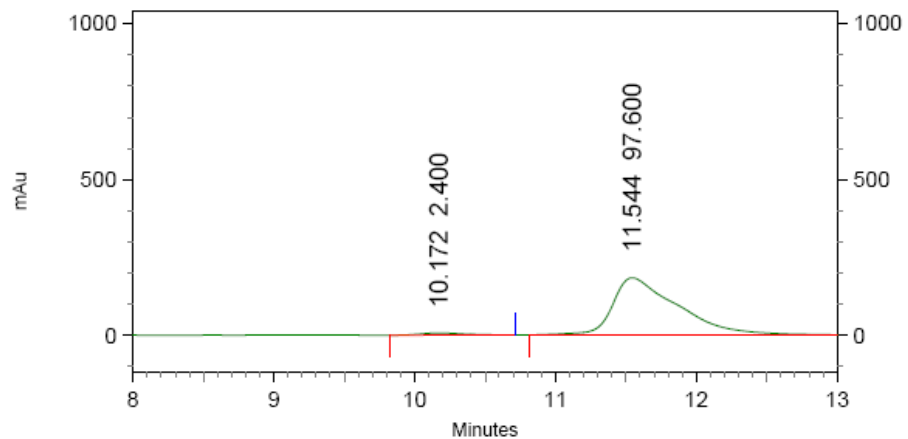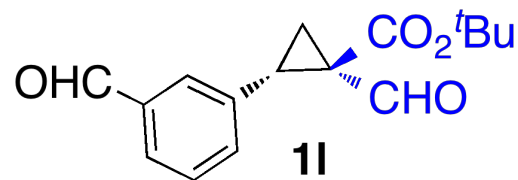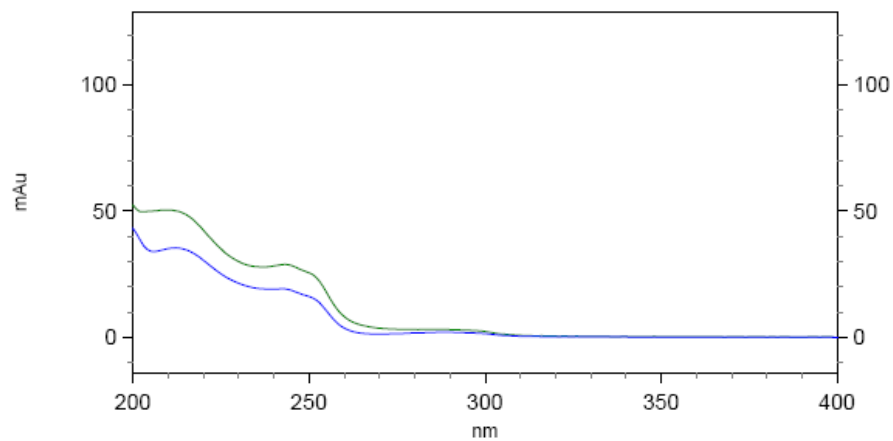

8: 223 nm, 4 nm

Results

| Pk #   | Name | Retention Time | Area Percent |
|--------|------|----------------|--------------|
| 1      |      | 10.172         | 2.400        |
| 2      |      | 11.544         | 97.600       |
| Totals |      |                | 100.000      |

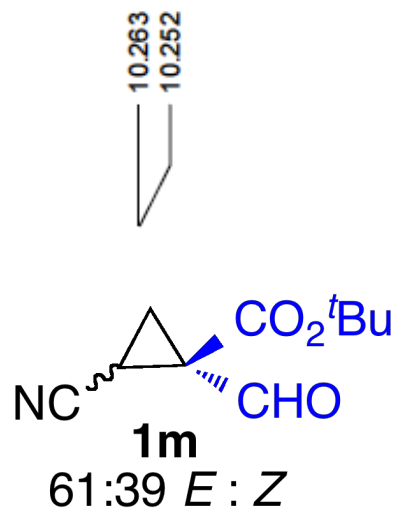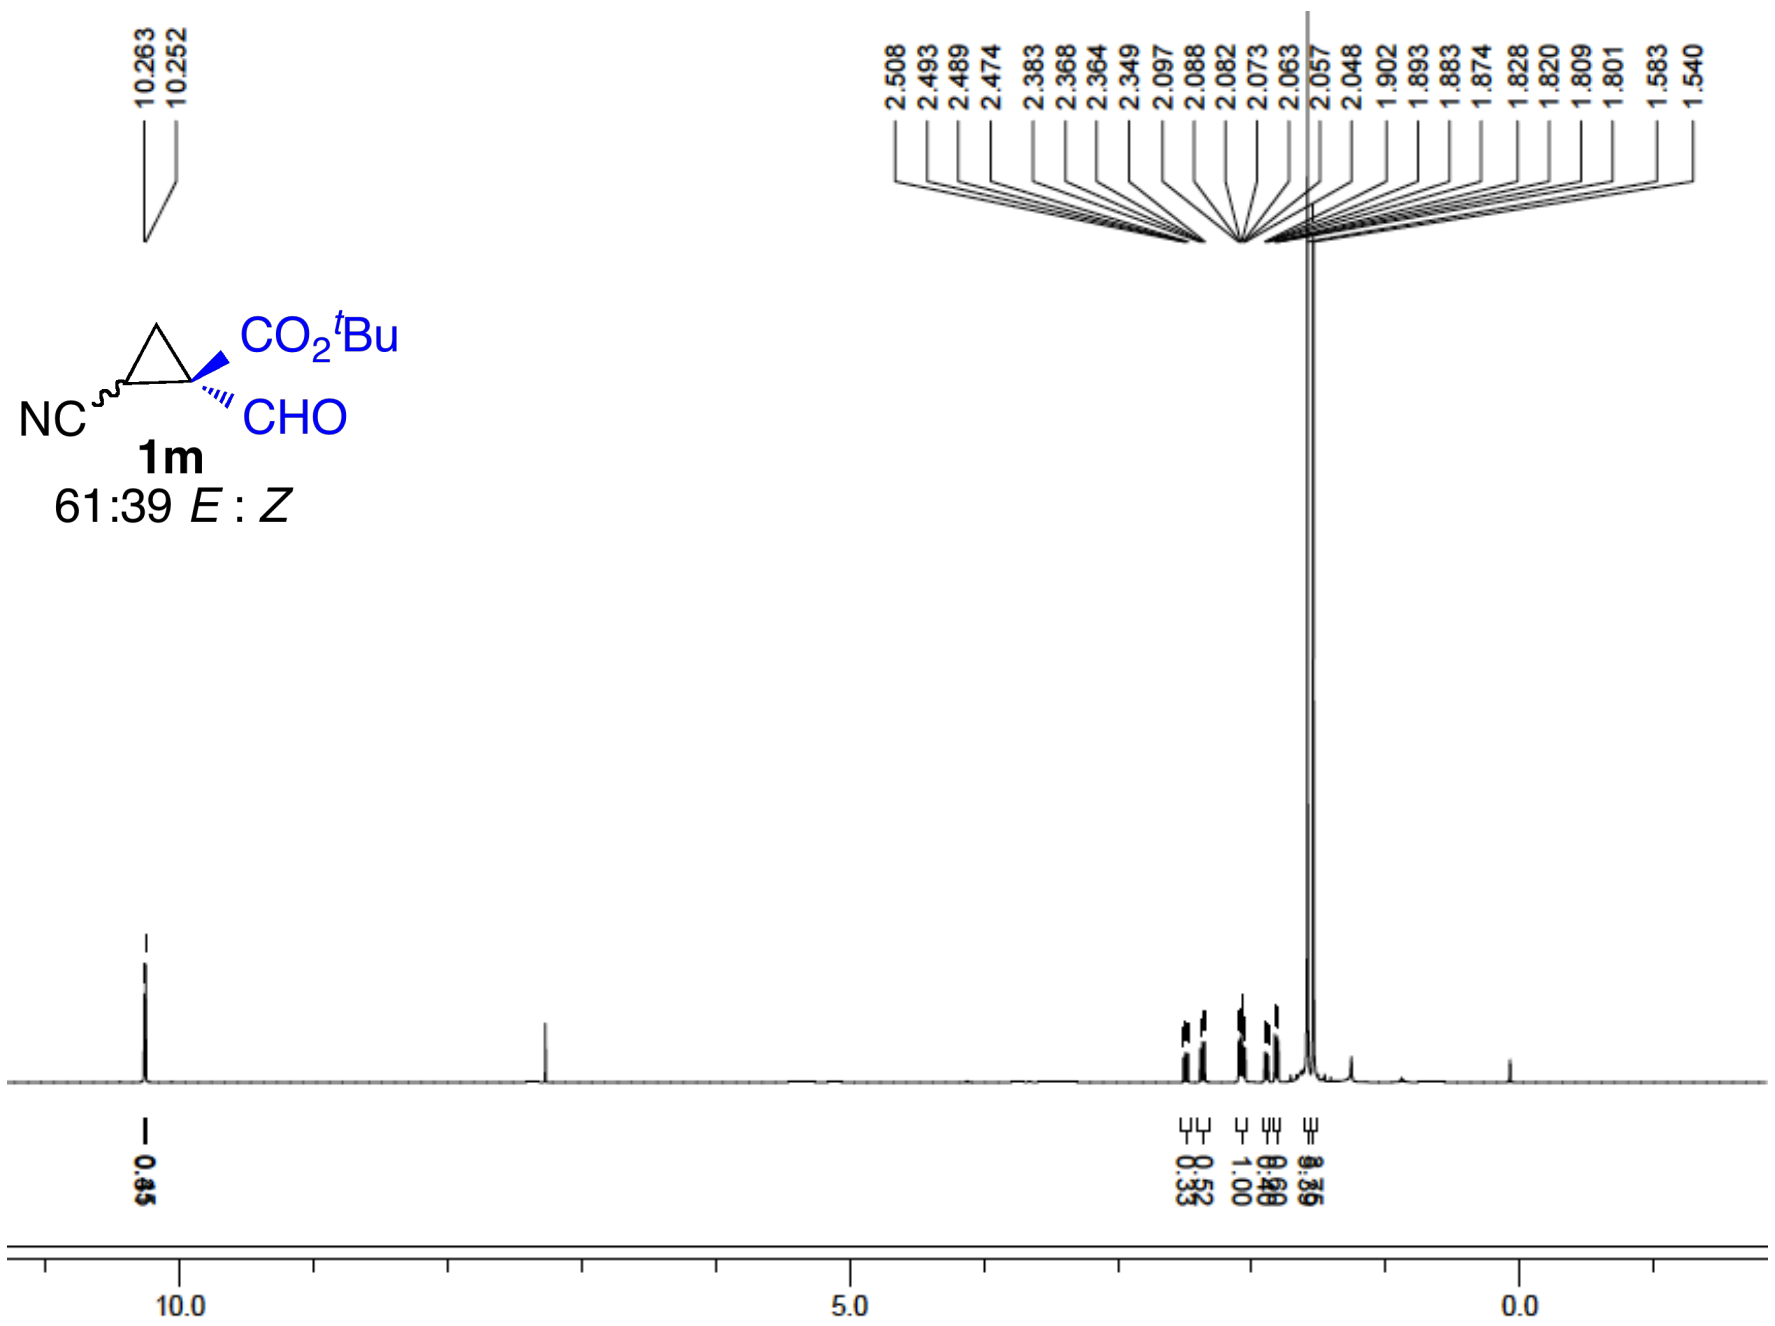

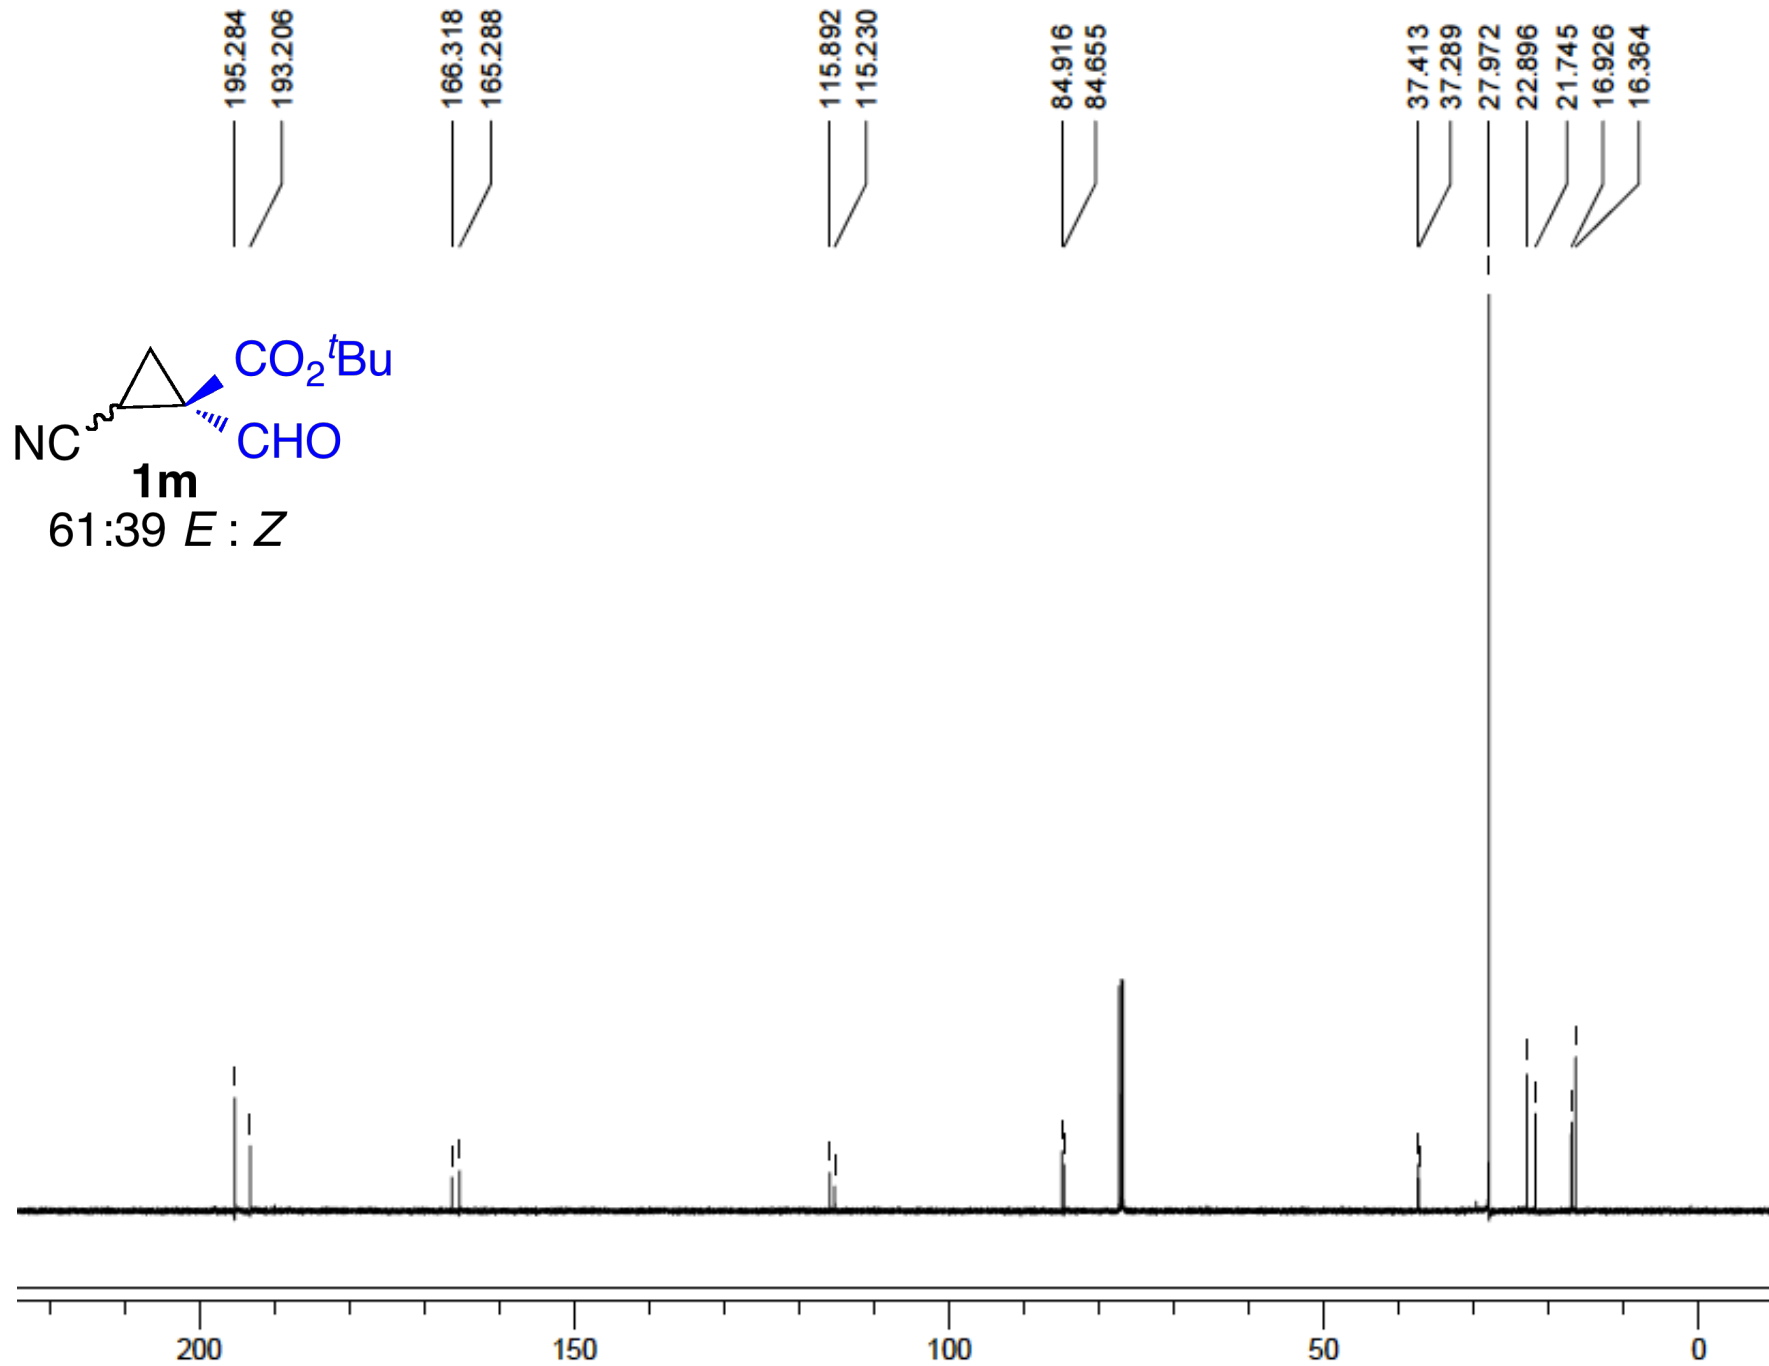

XC-IX-216RE-ADH1%1ml  
 C:\EZStart\Projects\Default\Method\XC-1%-ADH1ml.met  
 C:\EZStart\Projects\Default\Data\XC-IX-216RE-ADH1%1ml

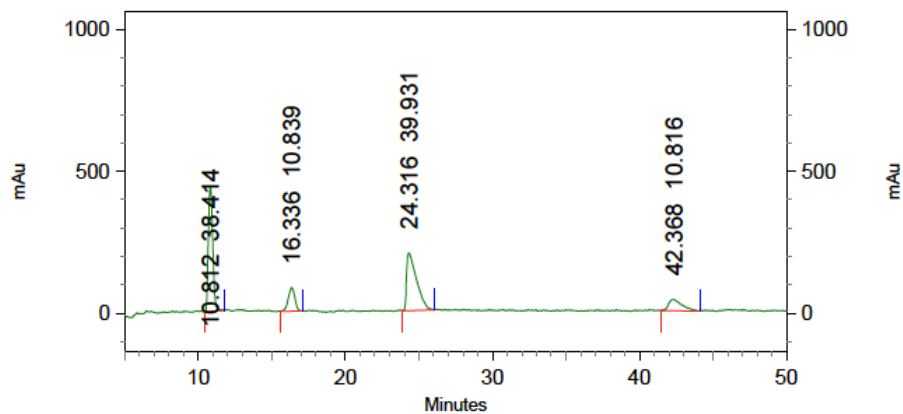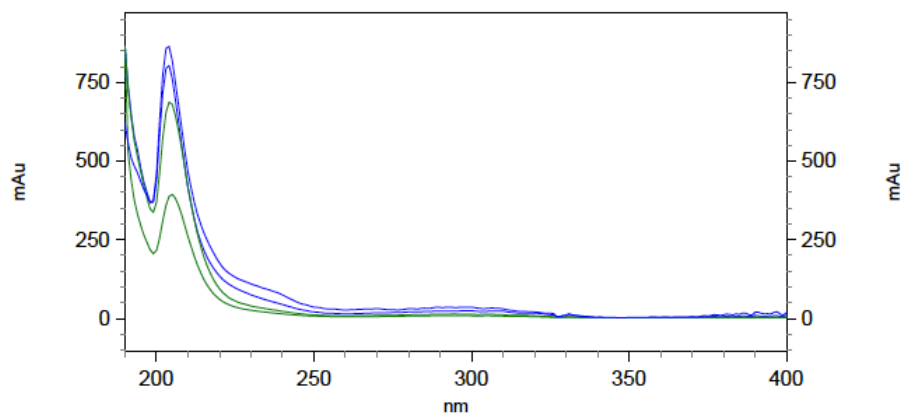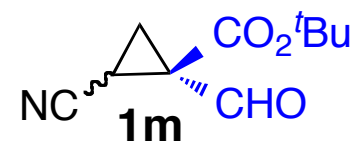

3: 206 nm, 4 nm

Results

| Name | Retention Time | Area Percent | Pk # |
|------|----------------|--------------|------|
|      | 10.812         | 38.414       | 1    |
|      | 16.336         | 10.839       | 2    |
|      | 24.316         | 39.931       | 3    |
|      | 42.368         | 10.816       | 4    |

|        |  |         |  |
|--------|--|---------|--|
| Totals |  | 100.000 |  |
|--------|--|---------|--|

XC-IX-220-ADH1%1ml

C:\EZStart\Projects\Default\Method\XC-1%-ADH1ml.met

C:\EZStart\Projects\Default\Data\XC-IX-220-ADH1%1ml

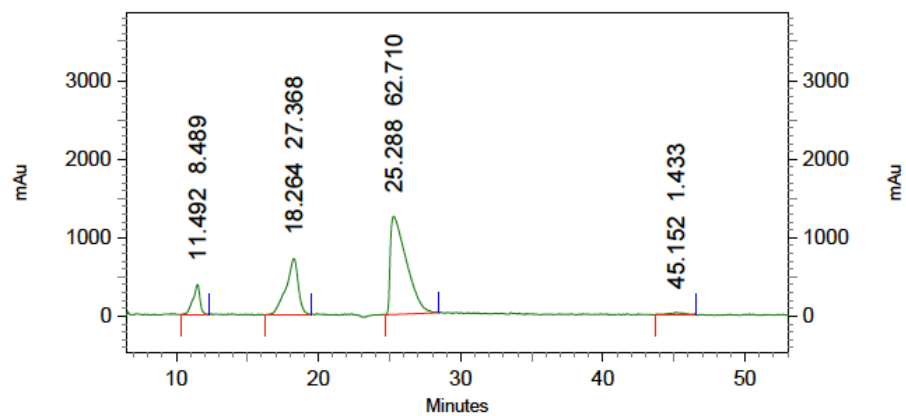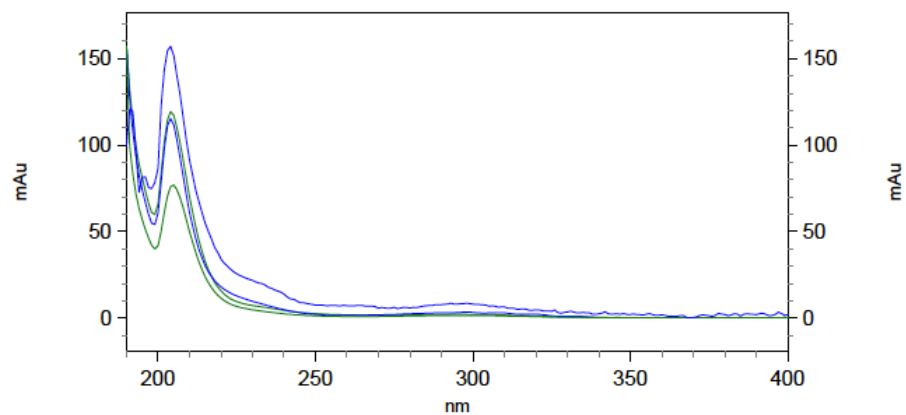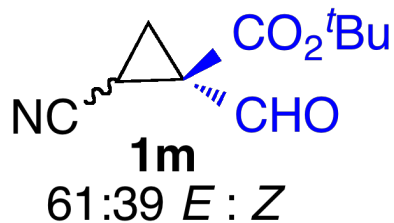

3: 207 nm, 4 nm

Results

| Name | Retention Time | Area Percent | Pk # |
|------|----------------|--------------|------|
|      | 11.492         | 8.489        | 1    |
|      | 18.264         | 27.368       | 2    |
|      | 25.288         | 62.710       | 3    |
|      | 45.152         | 1.433        | 4    |

|        |         |
|--------|---------|
| Totals | 100.000 |
|--------|---------|

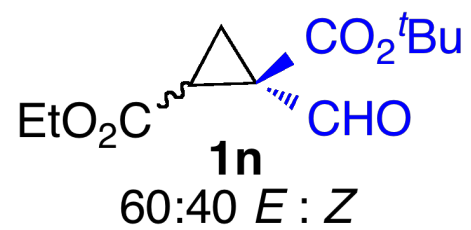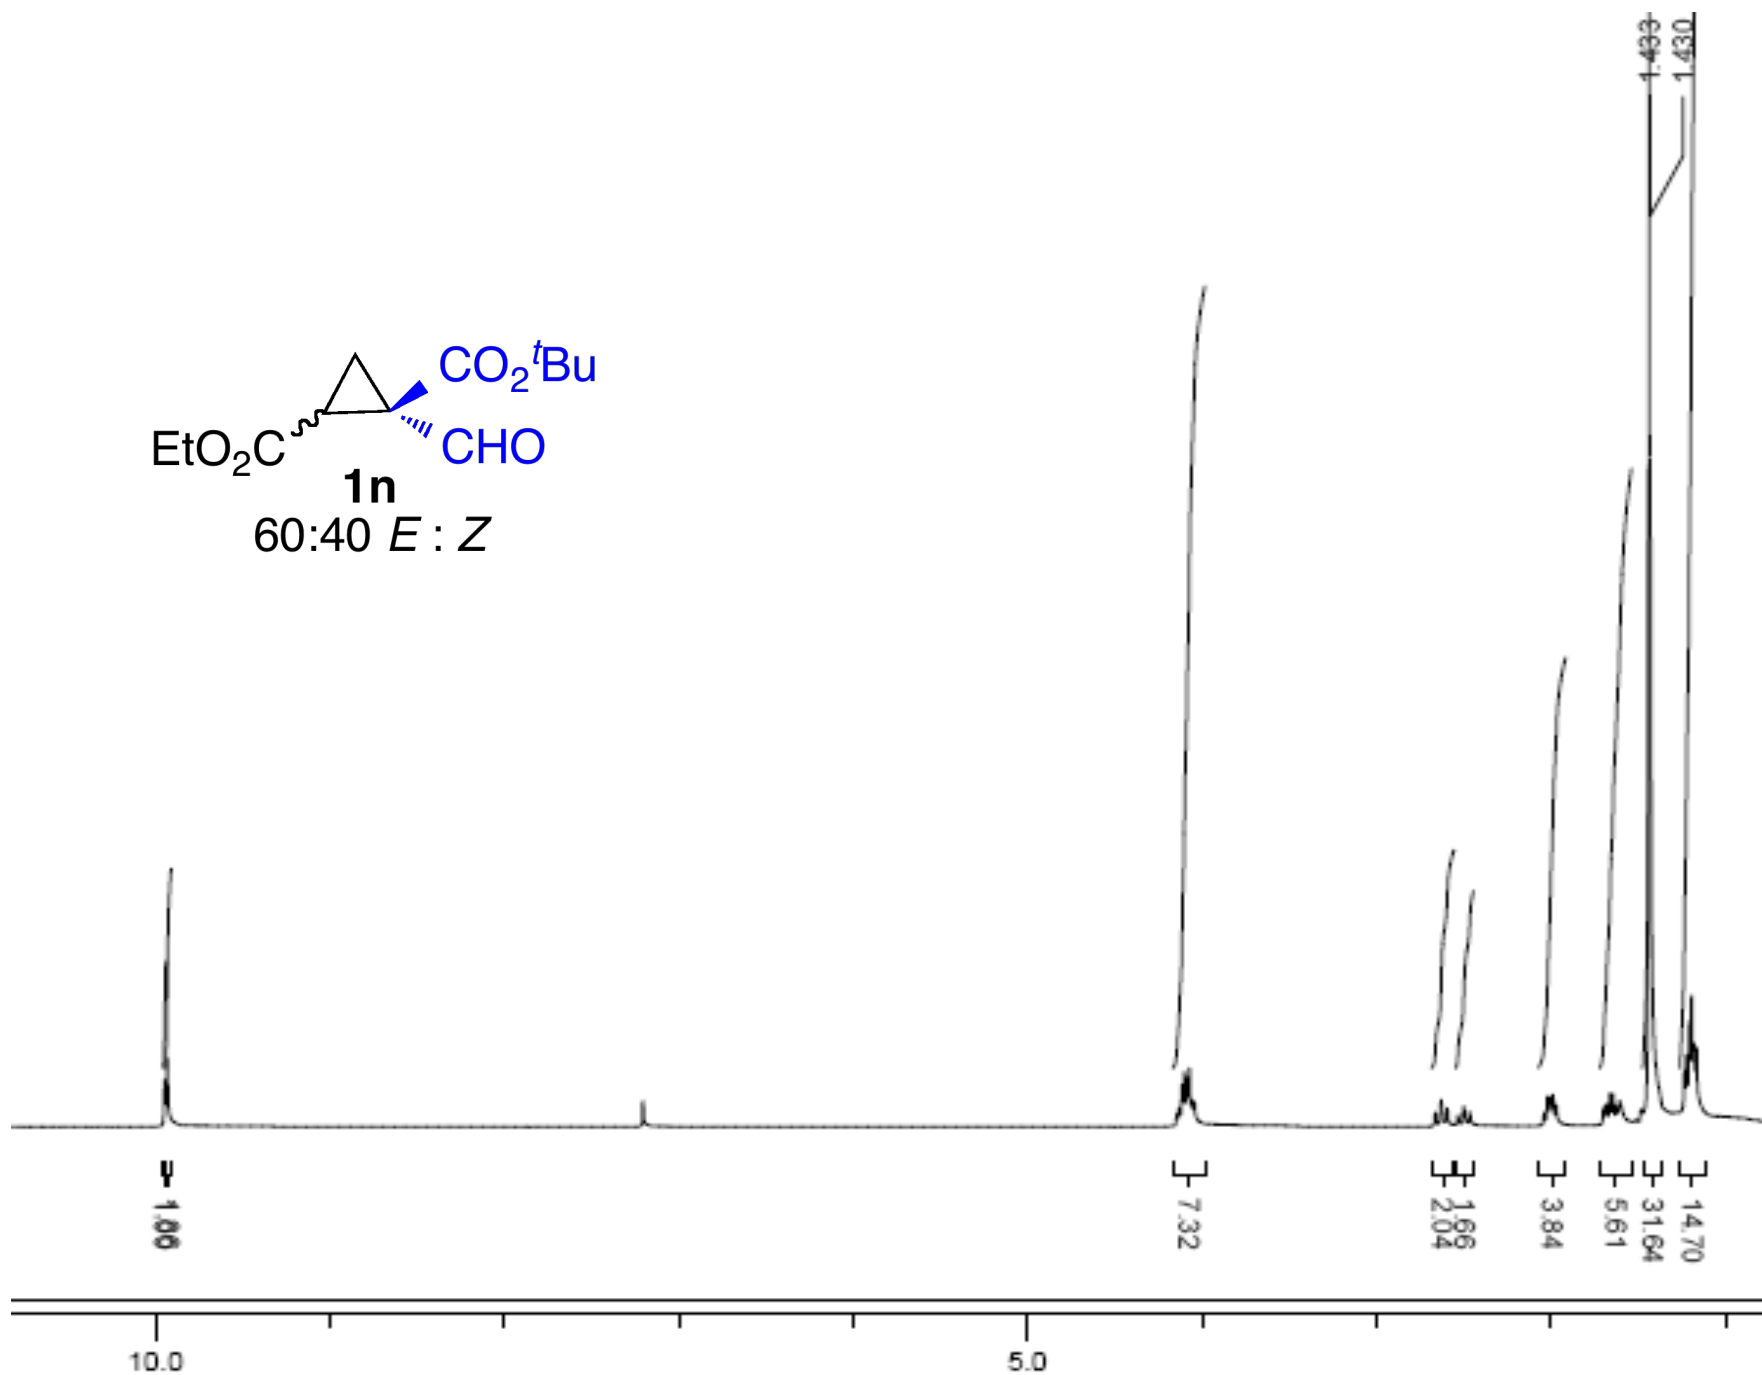

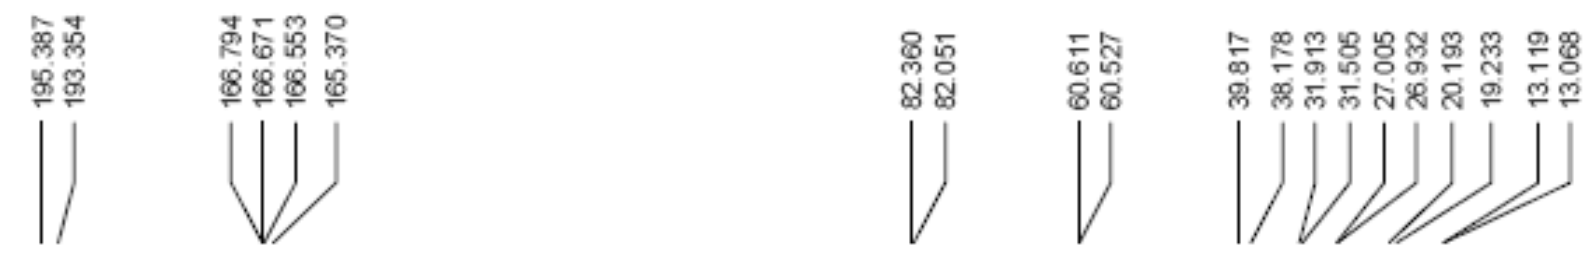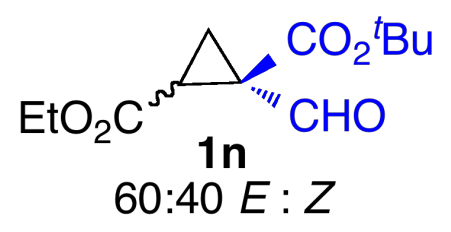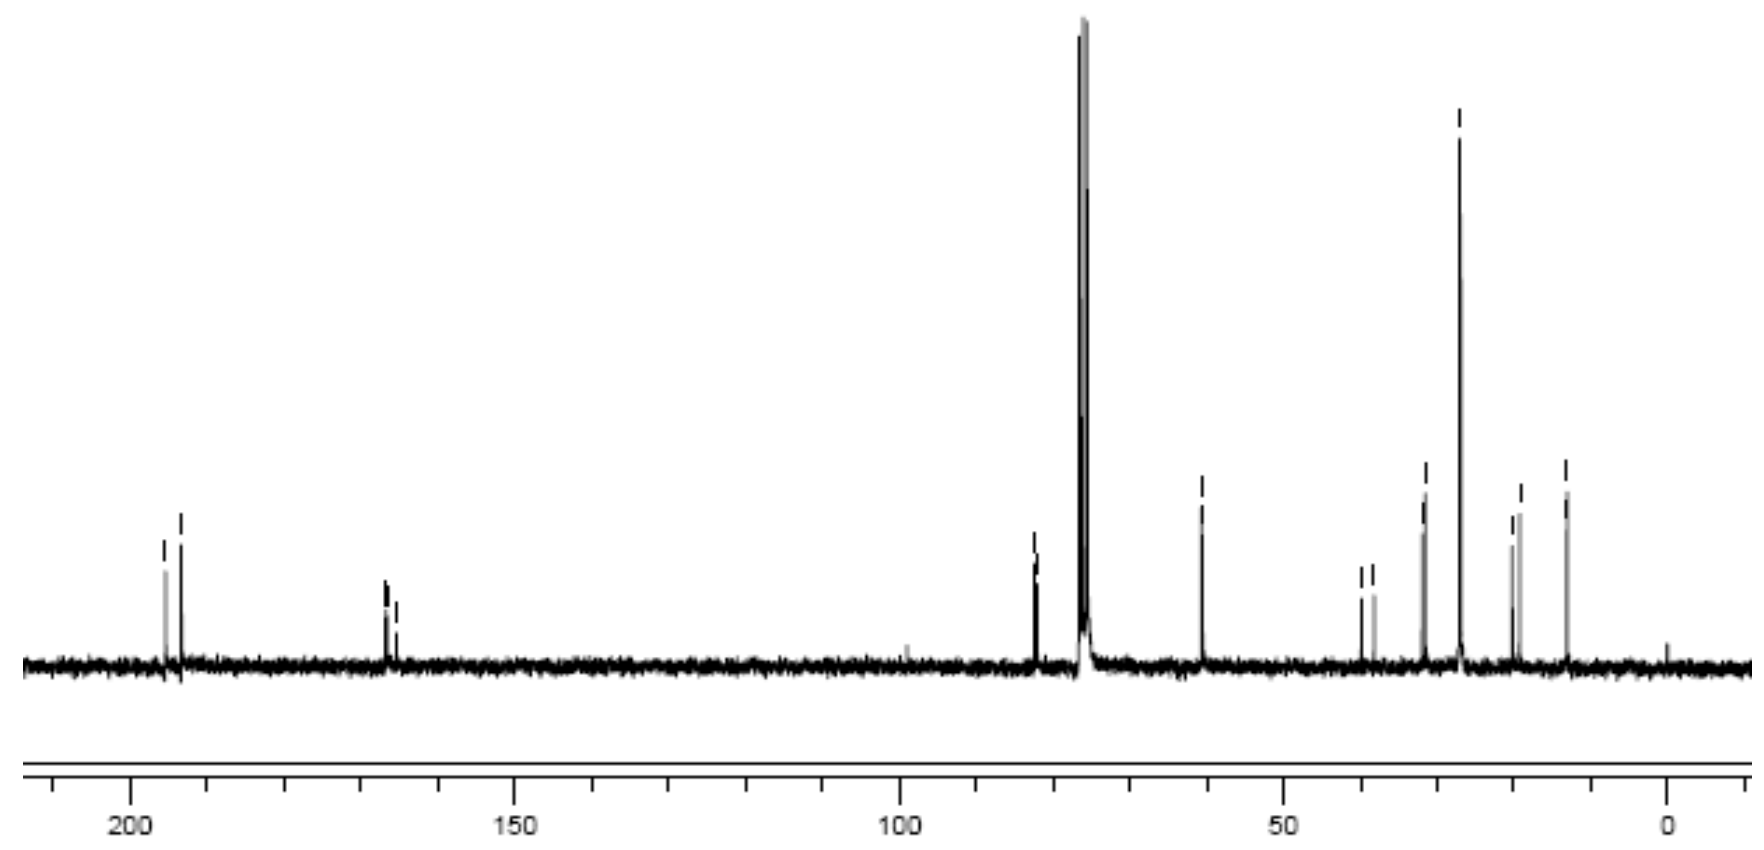



Sample Name : xx-vi-94 DCB 5 again  
 Sample ID : xx-vi-94 DCB 5 again

Chromatogram

Chromatogram xx-vi-94 DCB 5 again C:\GCMSsolution\Data\Project1\snow\xx-vi-94 DCB 5 again.qgd

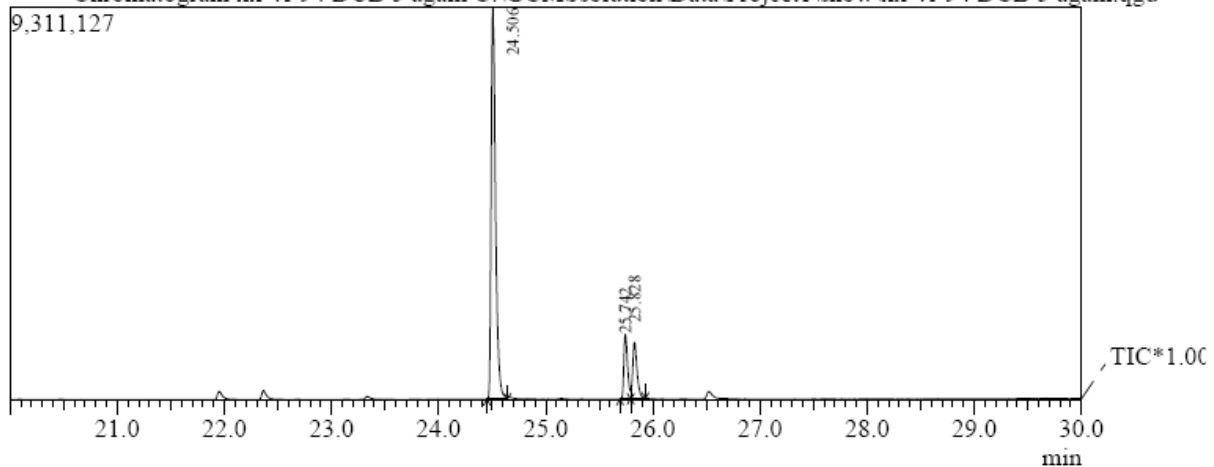

Peak Report TIC

| Peak# | R.Time | Area%  | Name | Base m/z |
|-------|--------|--------|------|----------|
| 1     | 24.506 | 78.02  |      | 57.10    |
| 2     | 25.742 | 10.98  |      | 57.10    |
| 3     | 25.828 | 11.00  |      | 57.10    |
|       |        | 100.00 |      |          |

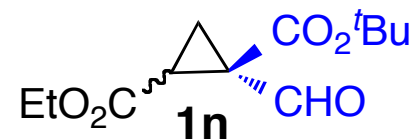

Spectrum

Peak#:1 R.Time:24.5(Scan#:5853)

MassPeaks:157

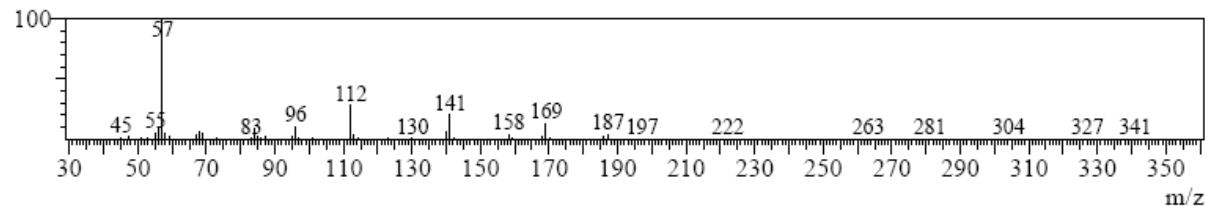

Peak#:2 R.Time:25.7(Scan#:6224)

MassPeaks:140

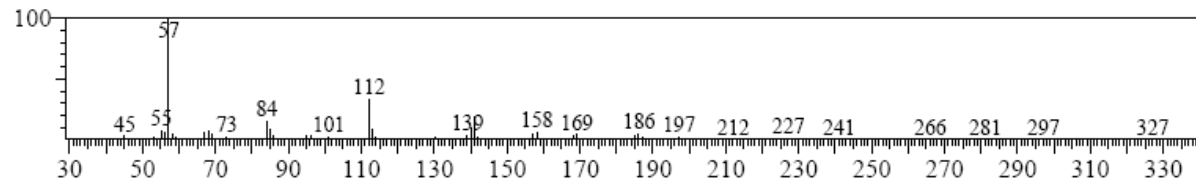

Sample Name : xx-vi-102 DCB 5  
 Sample ID : xx-vi-102 DCB 5

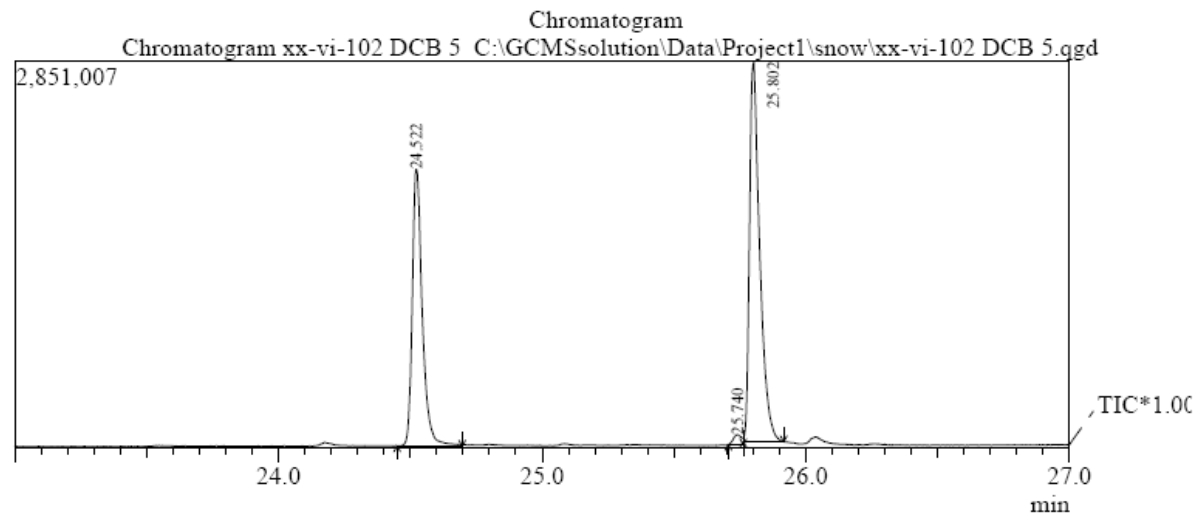

Peak Report TIC

| Peak# | R.Time | Area%  | Name | Base m/z |
|-------|--------|--------|------|----------|
| 1     | 24.522 | 41.14  |      | 57.10    |
| 2     | 25.740 | 1.23   |      | 57.10    |
| 3     | 25.802 | 57.63  |      | 57.10    |
|       |        | 100.00 |      |          |

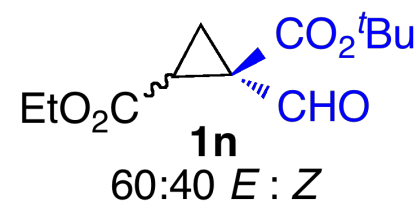

Spectrum

Peak#:1 R.Time:24.5(Scan#:5858)

MassPeaks:136

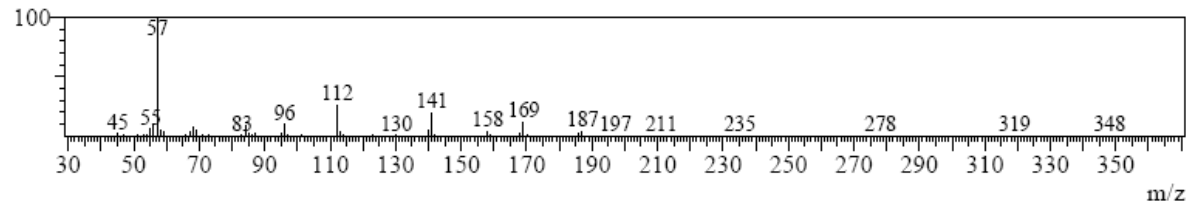

Peak#:2 R.Time:25.7(Scan#:6223)

MassPeaks:96

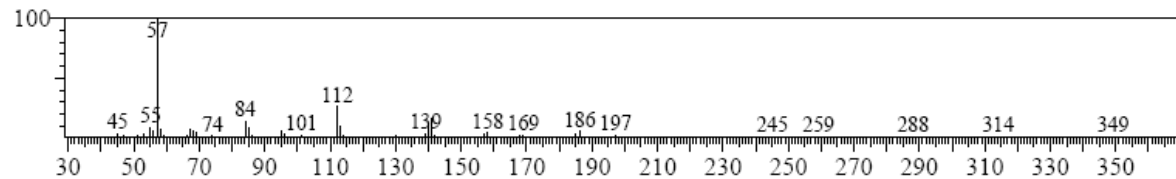

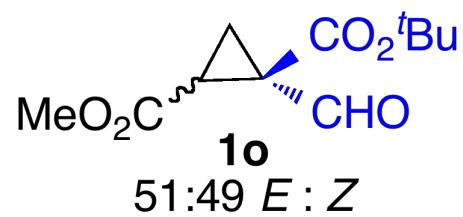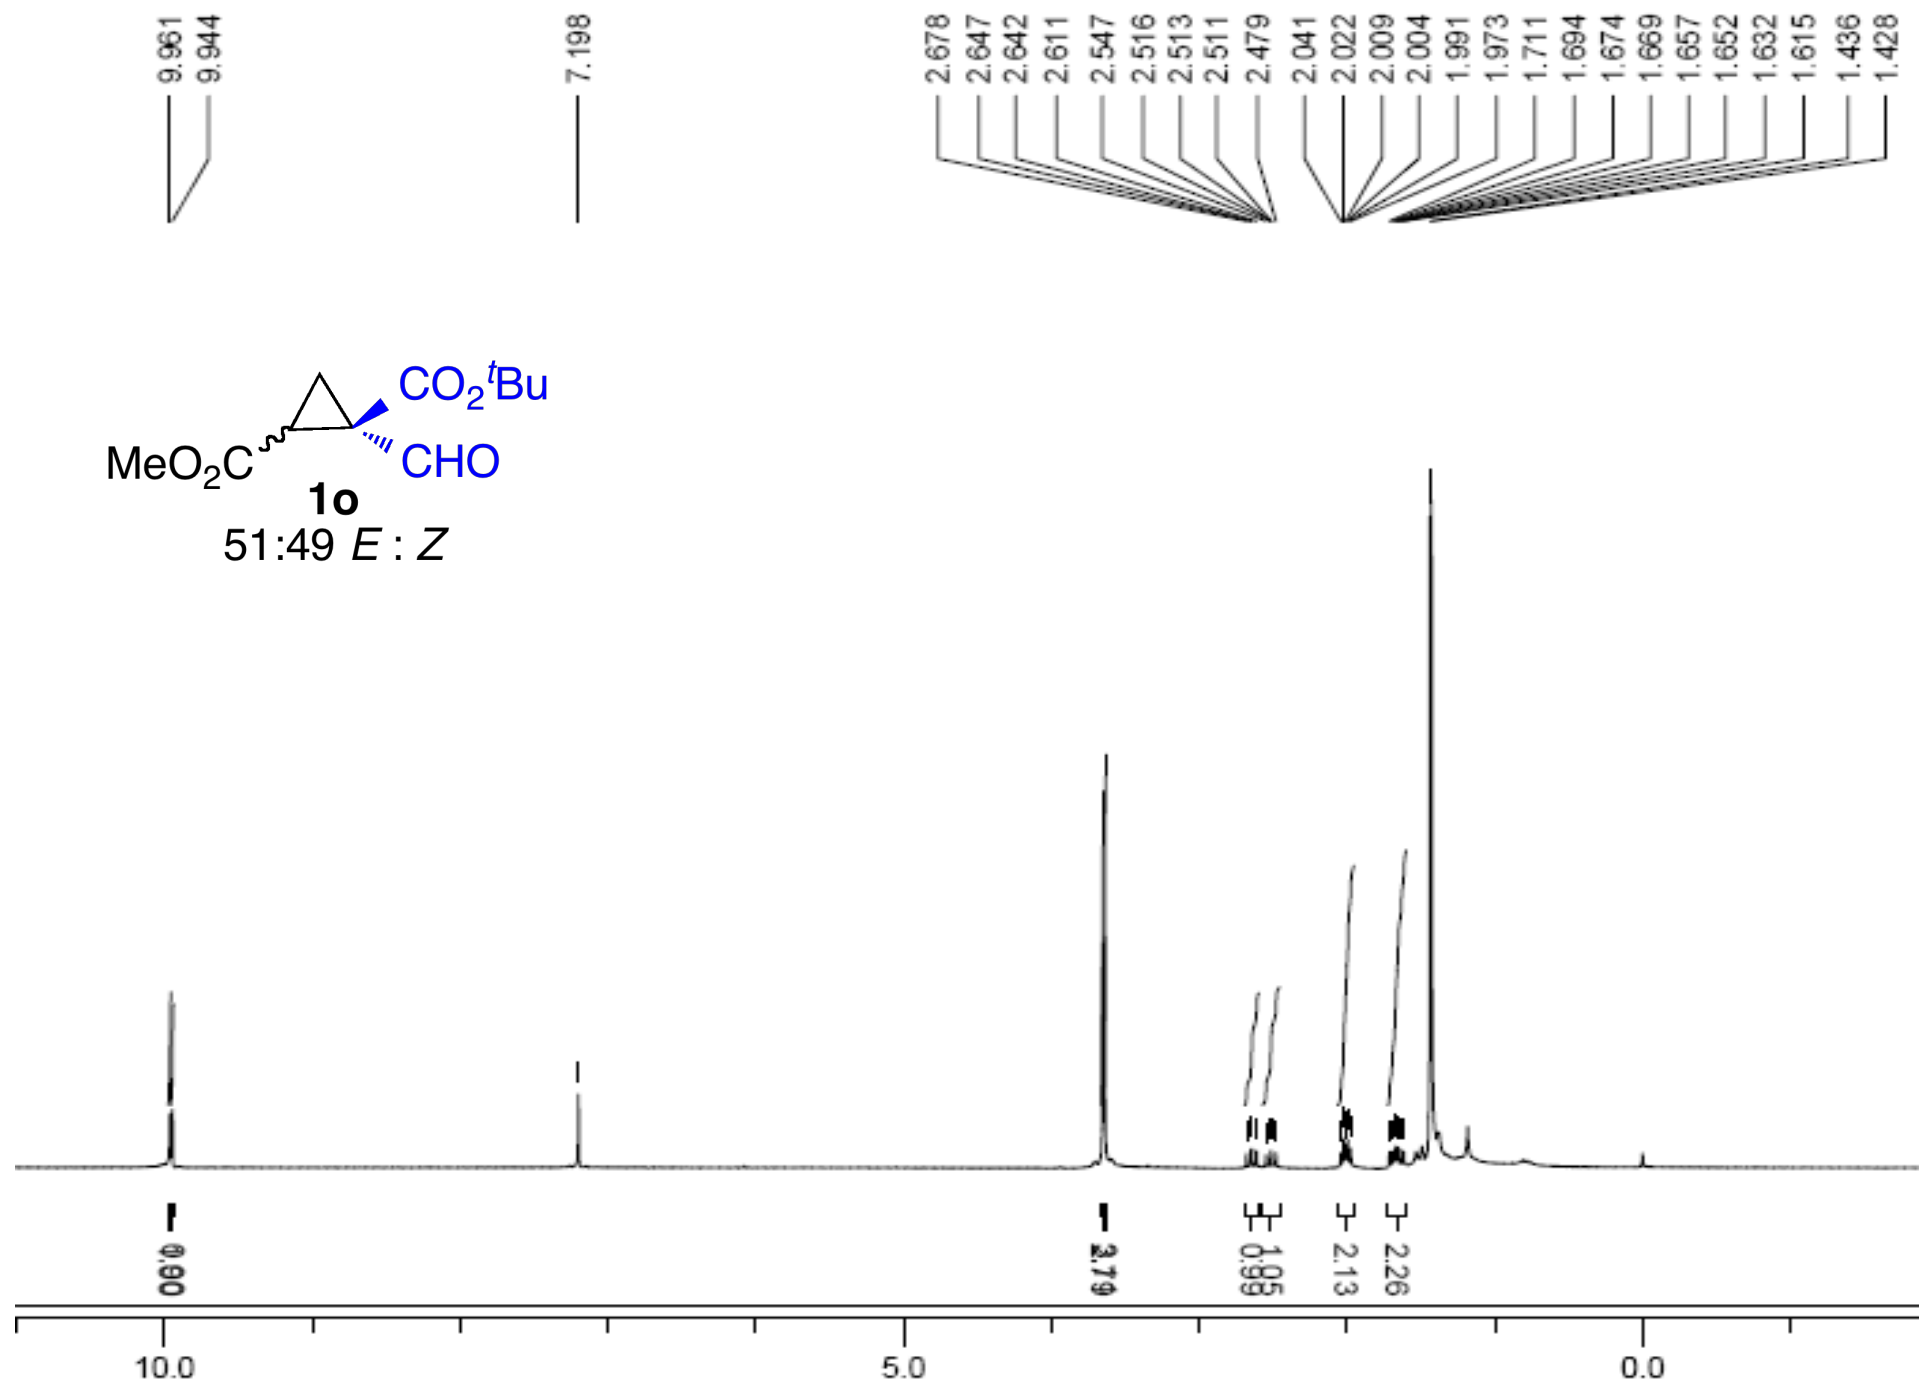

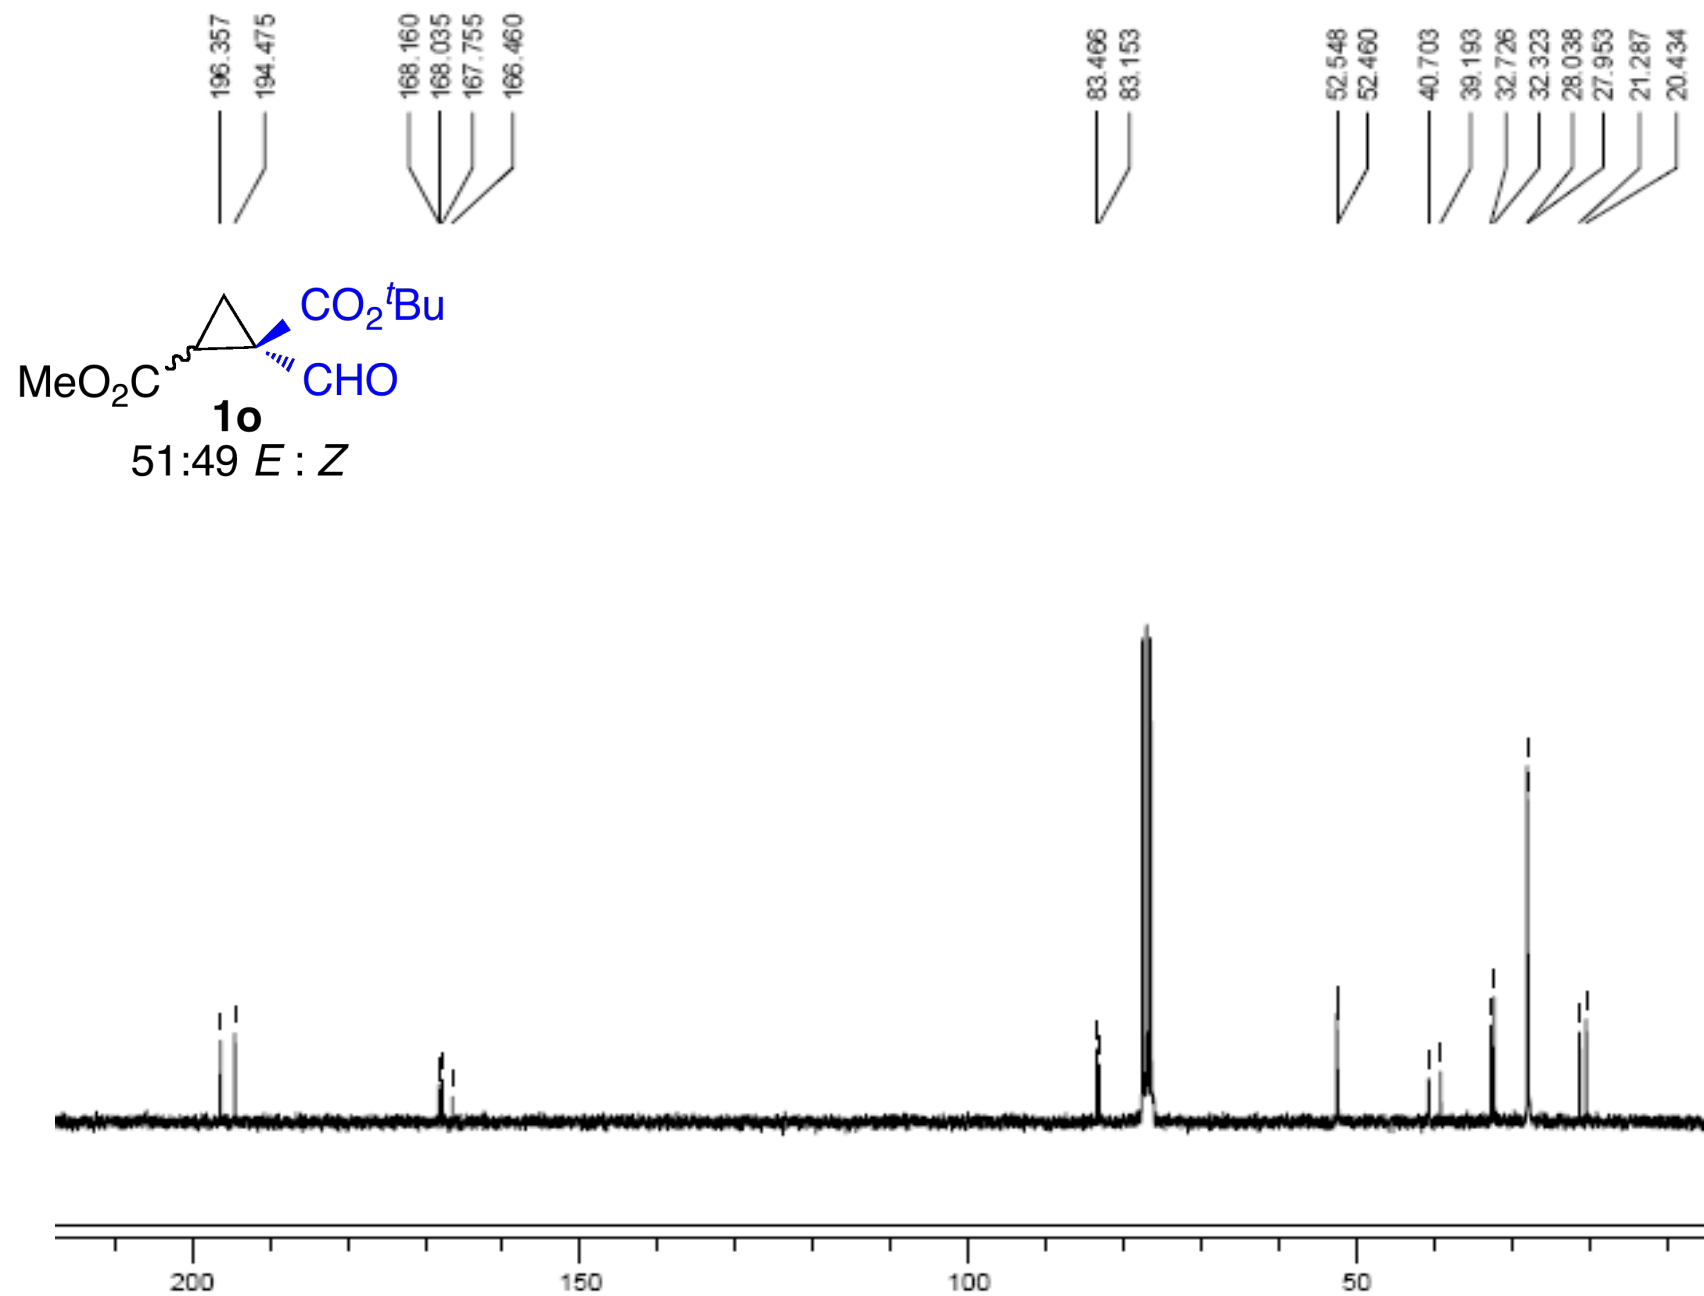

Sample Name : xx-vi-93 DexCB 5  
 Sample ID : xx-vi-93 DexCB 5

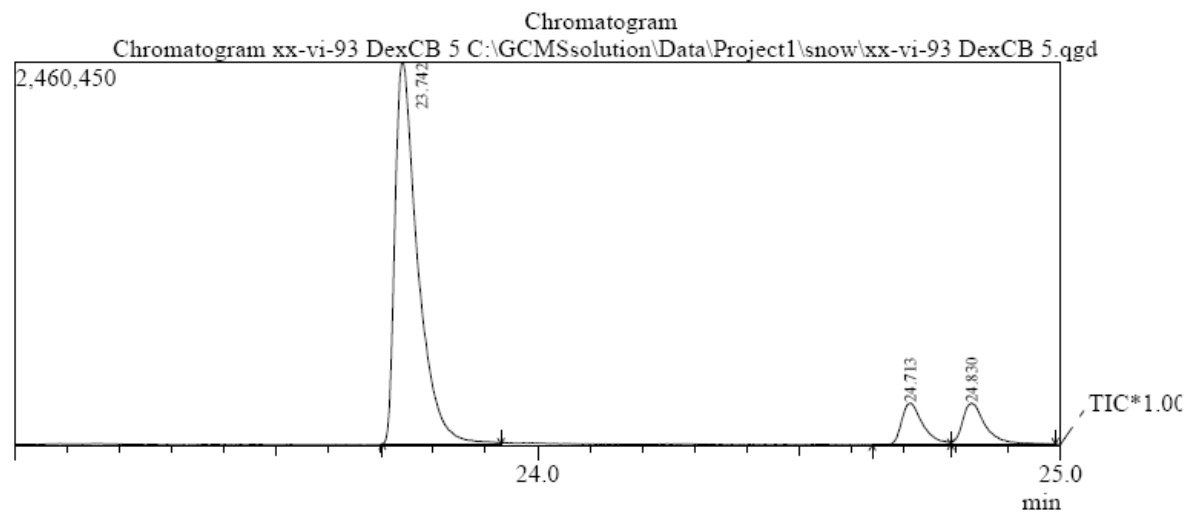

Peak Report TIC

| Peak# | R.Time | Area%  | Name | Base m/z |
|-------|--------|--------|------|----------|
| 1     | 23.742 | 82.78  |      | 57.10    |
| 2     | 24.713 | 8.44   |      | 57.10    |
| 3     | 24.830 | 8.78   |      | 57.10    |
|       |        | 100.00 |      |          |

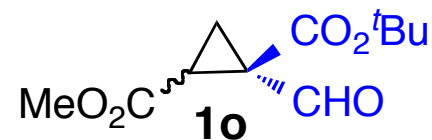

Peak#:1 R.Time:23.7(Scan#:5624)  
 MassPeaks:116

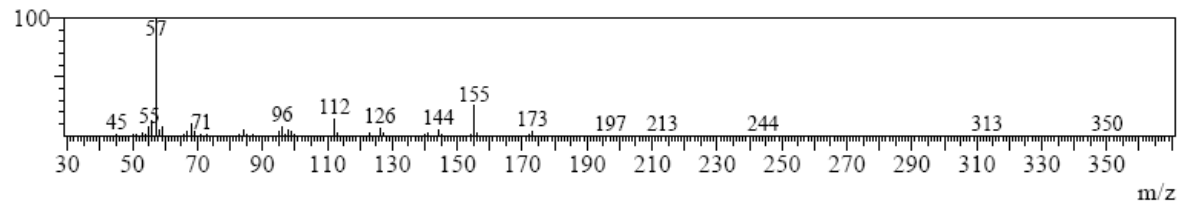

Peak#:2 R.Time:24.7(Scan#:5915)  
 MassPeaks:103

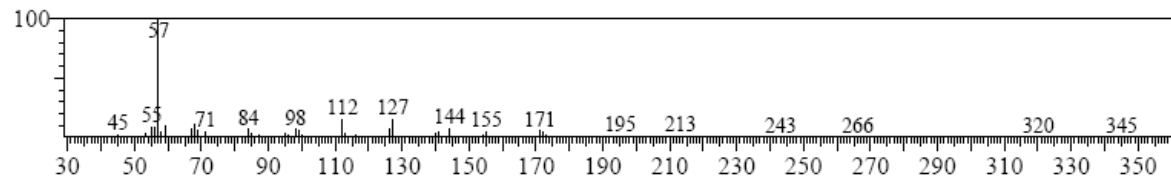

Sample Name : xx-vi-103 DexCB 5  
 Sample ID : xx-vi-103 DexCB 5

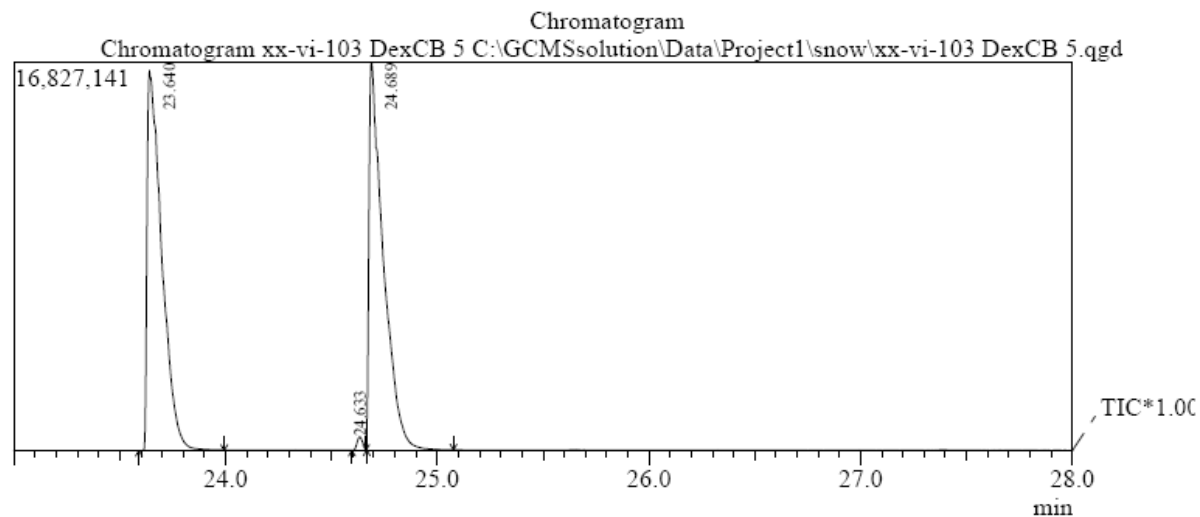

Peak Report TIC

| Peak# | R.Time | Area%  | Name | Base m/z |
|-------|--------|--------|------|----------|
| 1     | 23.640 | 49.71  |      | 57.10    |
| 2     | 24.633 | 0.74   |      | 57.10    |
| 3     | 24.689 | 49.55  |      | 57.10    |
|       |        | 100.00 |      |          |

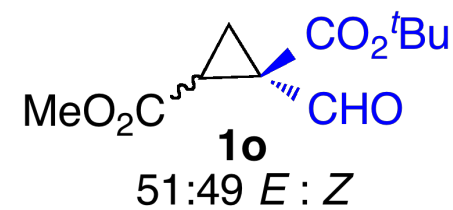

Spectrum

Peak#:1 R.Time:23.6(Scan#:5593)  
 MassPeaks:150

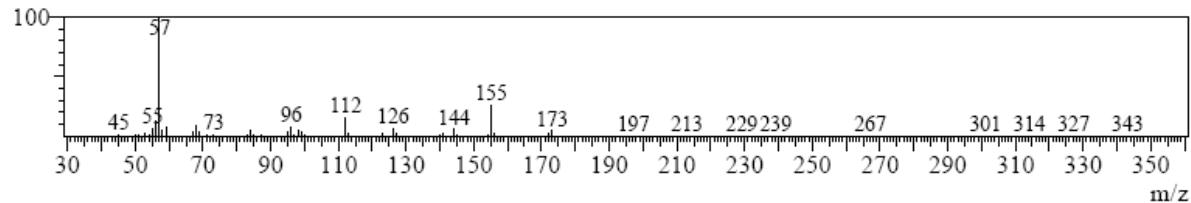

Peak#:2 R.Time:24.6(Scan#:5891)  
 MassPeaks:104

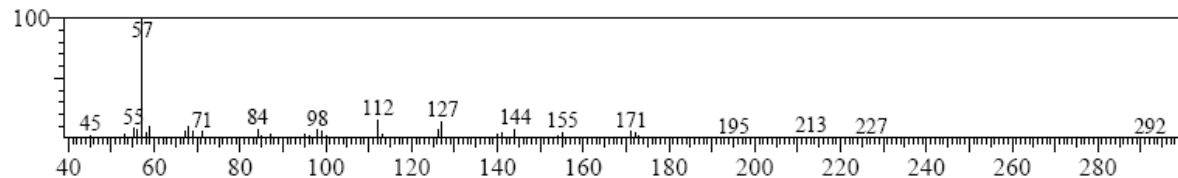

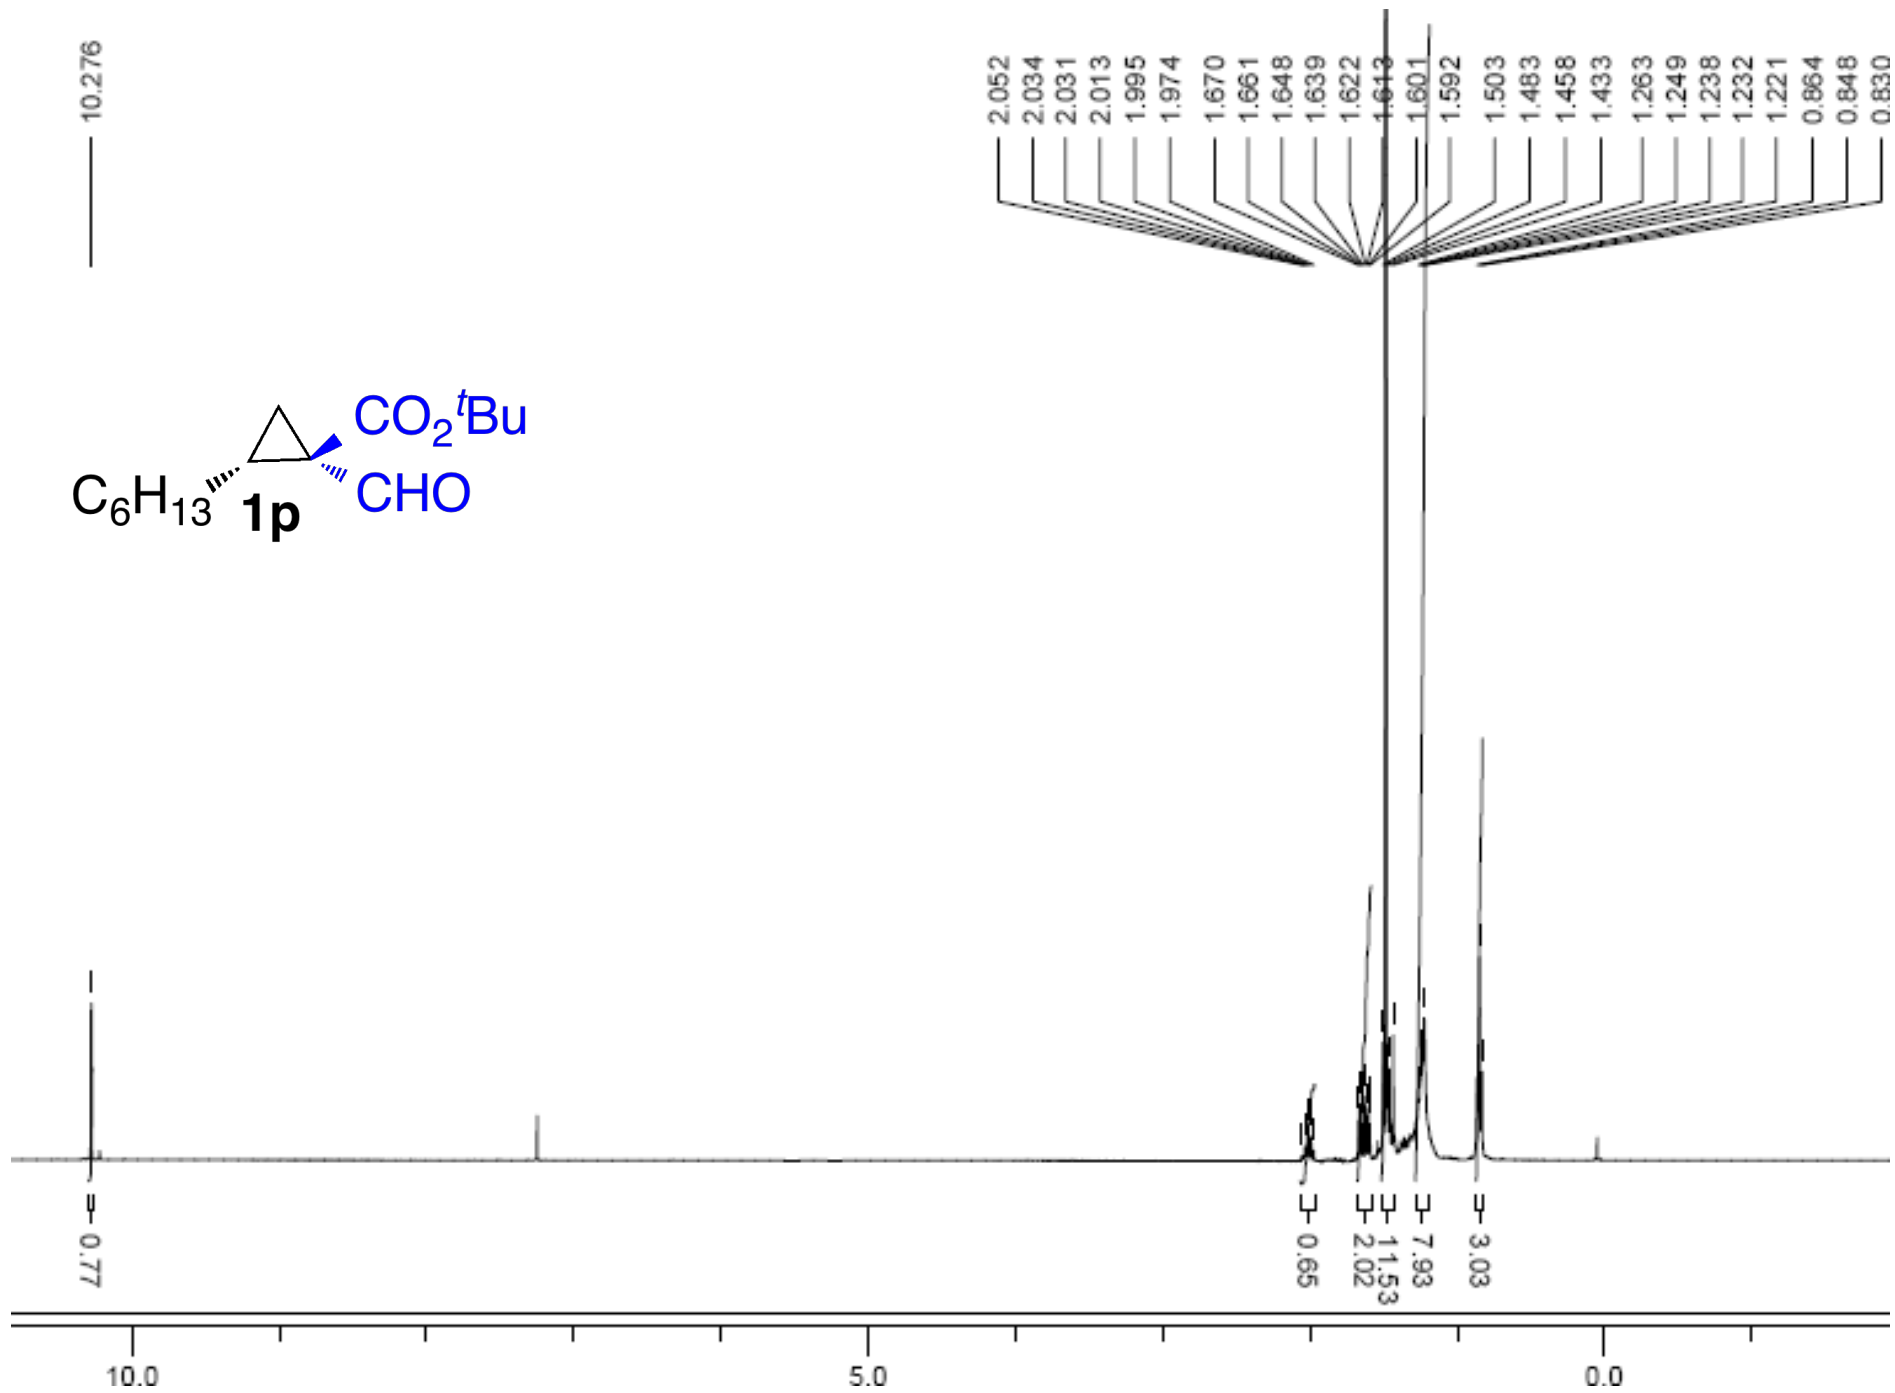

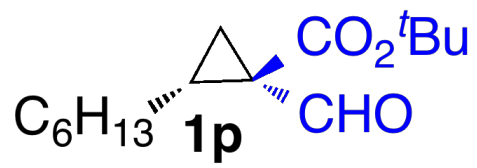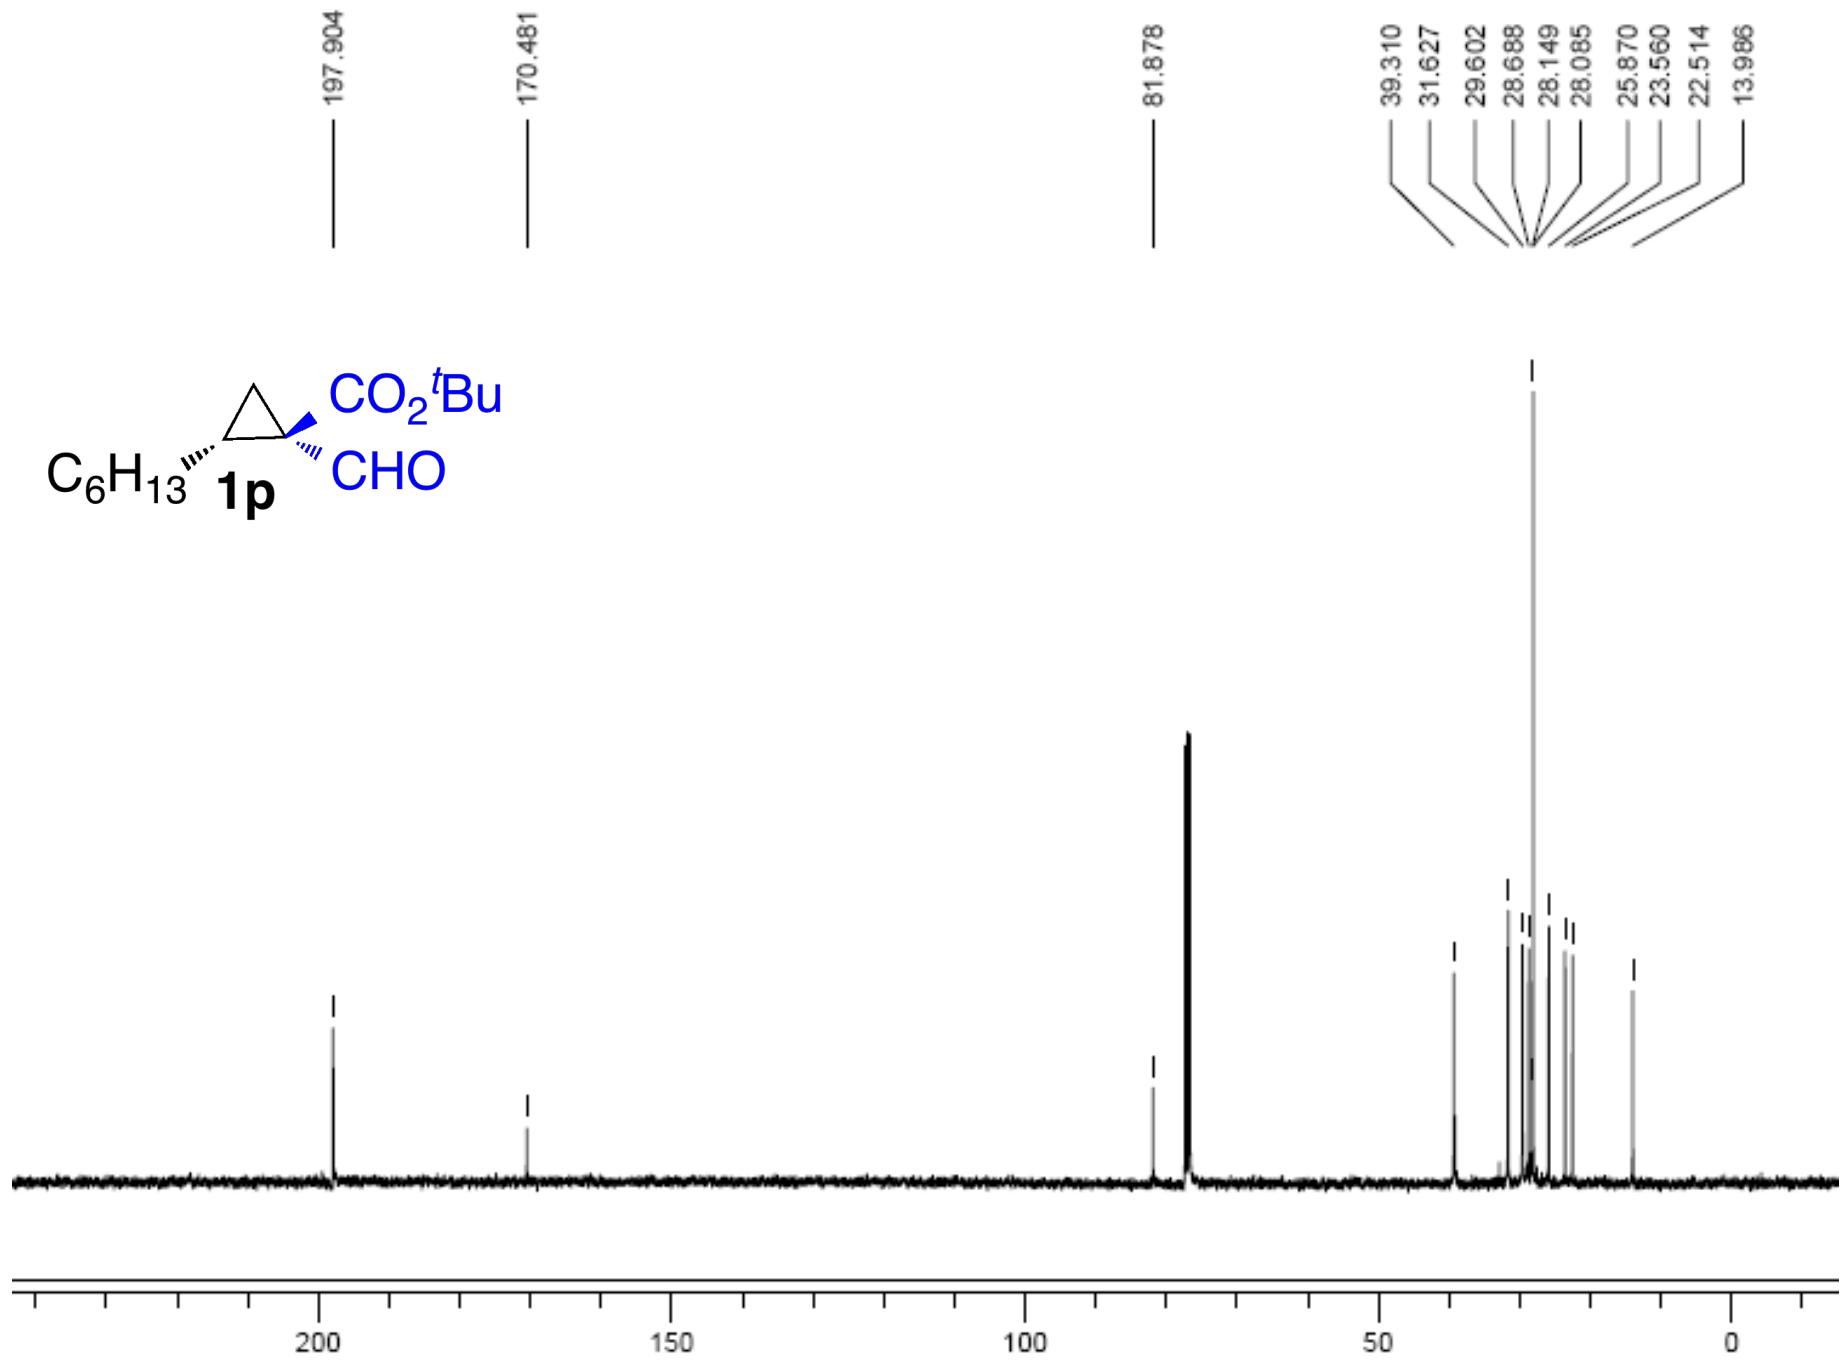



Sample Name : xx-viii-113 DB 3  
Sample ID : xx-viii-113 DB 3

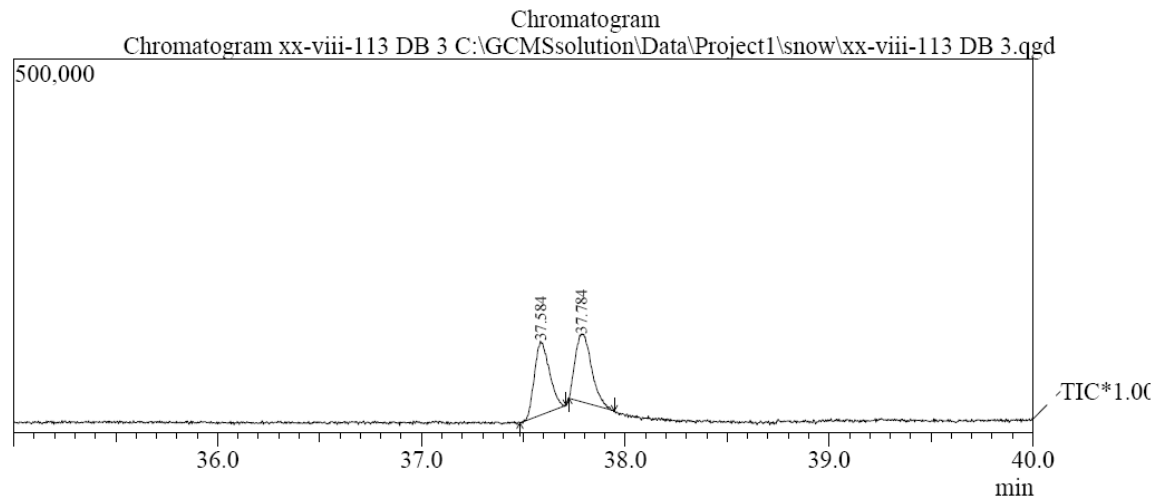

Peak Report TIC

| Peak# | R.Time | Area%  | Name | Base m/z |
|-------|--------|--------|------|----------|
| 1     | 37.584 | 49.91  |      | 57.10    |
| 2     | 37.784 | 50.09  |      | 57.05    |
|       |        | 100.00 |      |          |

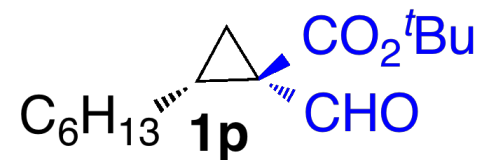

Spectrum

Peak#:1 R.Time:37.6(Scan#:9776)  
MassPeaks:136

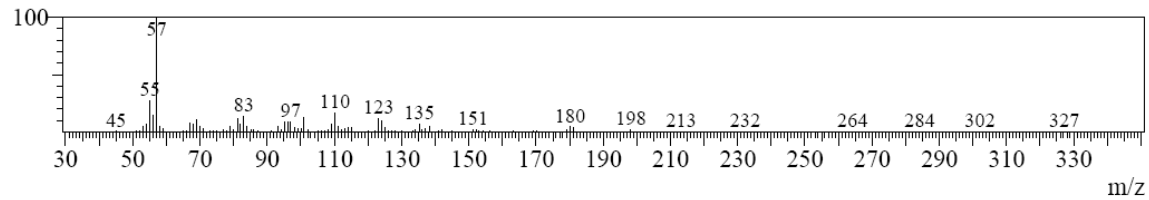

Peak#:2 R.Time:37.8(Scan#:9836)  
MassPeaks:137

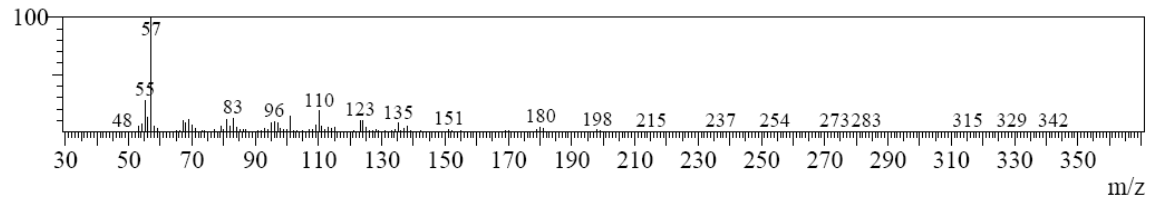

Sample Name : xx-viii-117 DB 3  
Sample ID : xx-viii-117 DB 3

Chromatogram

Chromatogram xx-viii-117 DB 3 C:\GCMSsolution\Data\Project1\snow\xx-viii-117 DB 3.qgd

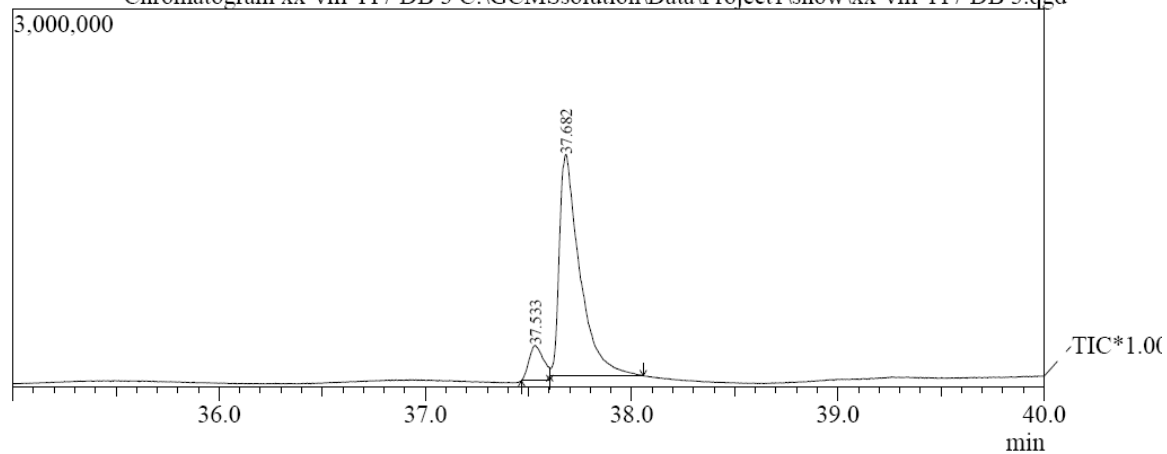

Peak Report TIC

| Peak# | R.Time | Area% | Name | Base m/z |
|-------|--------|-------|------|----------|
| 1     | 37.533 | 10.12 |      | 57.10    |
| 2     | 37.682 | 89.88 |      | 57.10    |

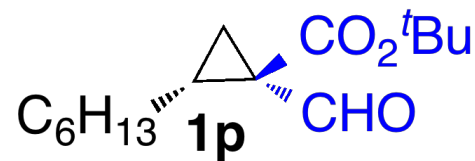

Spectrum

Peak#:1 R.Time:37.5(Scan#:9761)

MassPeaks:165

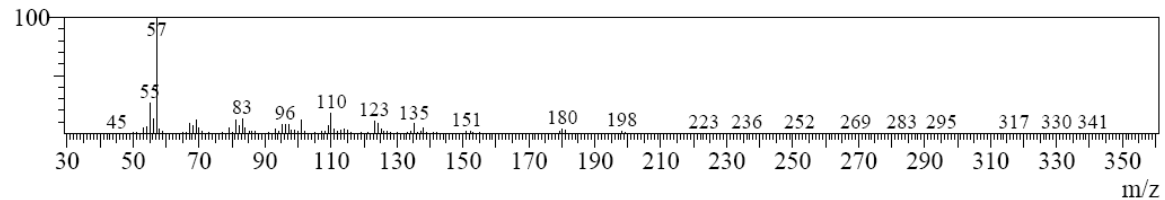

Peak#:2 R.Time:37.7(Scan#:9806)

MassPeaks:169

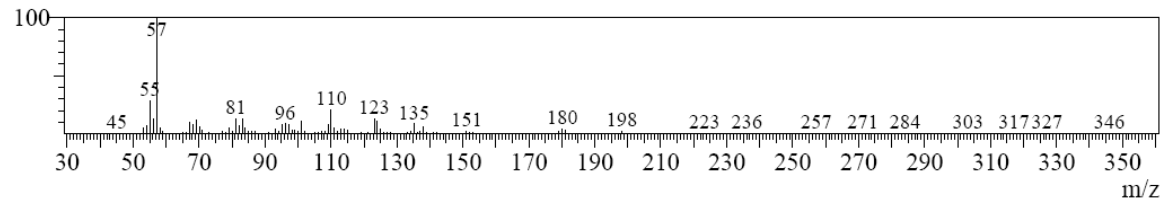

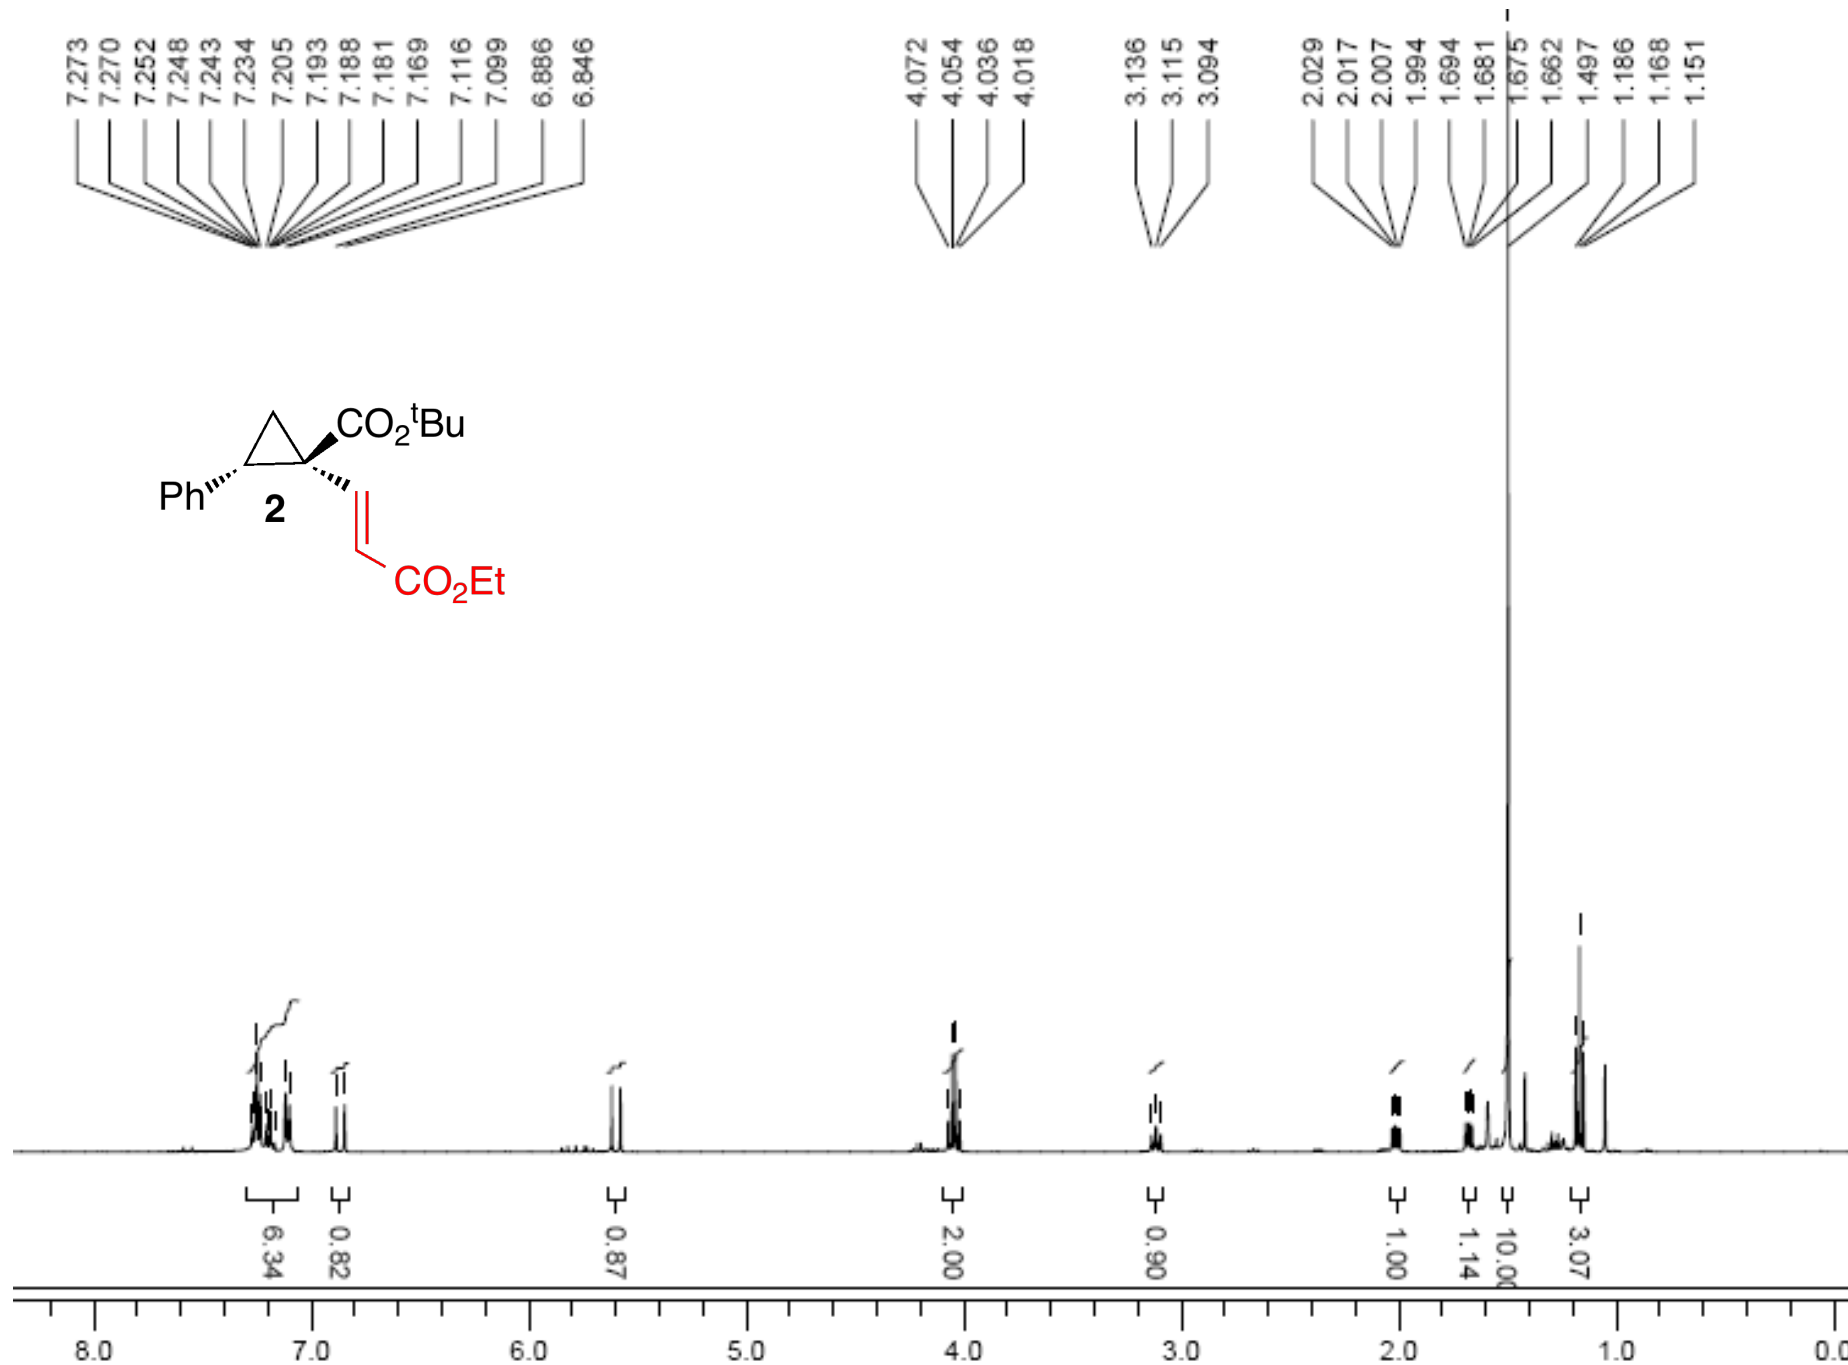

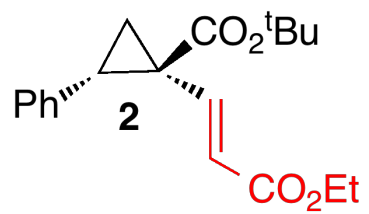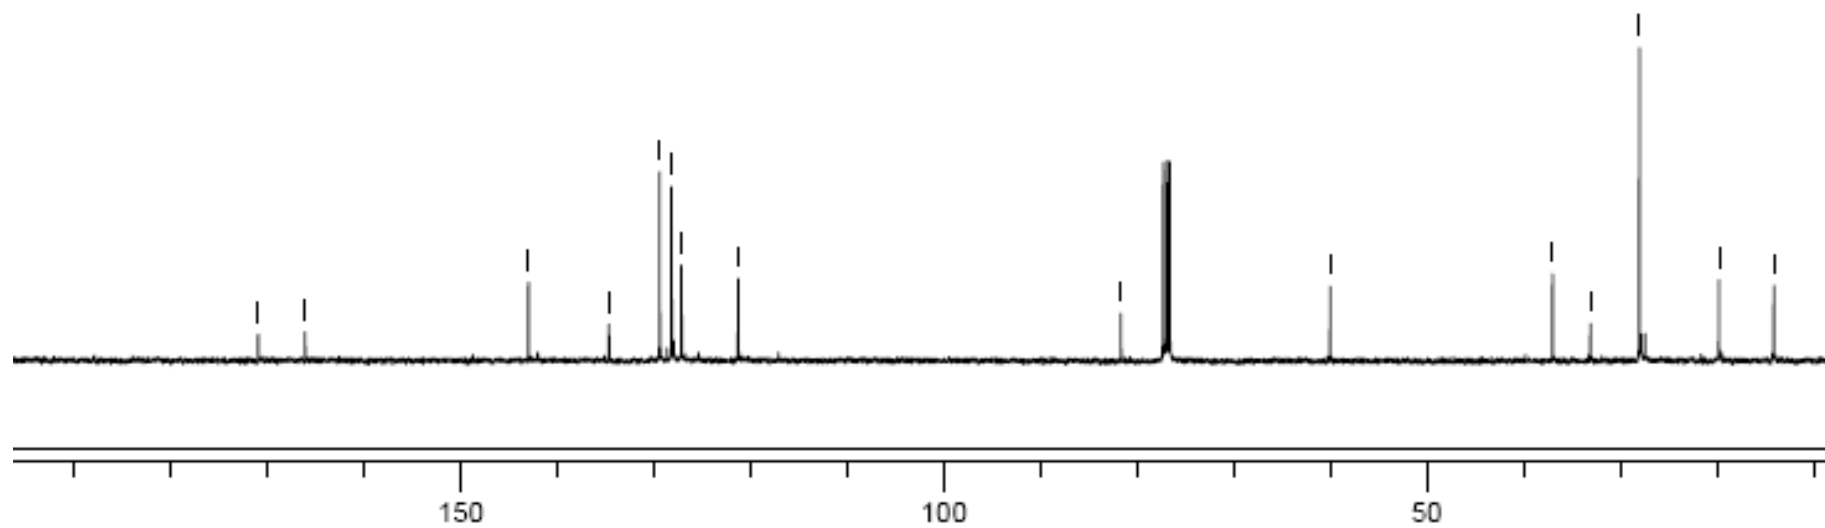

xx-viii-110 whelk 1%@1.0 ml

C:\EZStart\Projects\Default\Method\Shifa-P-Cyclopropane 5%Whelk.met

C:\EZStart\Projects\Default\Data\xx-viii-110 whelk 1%@1.0 ml

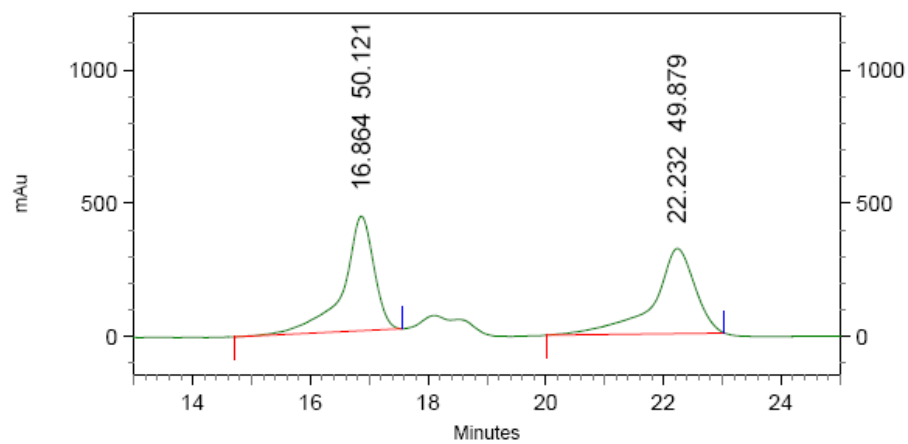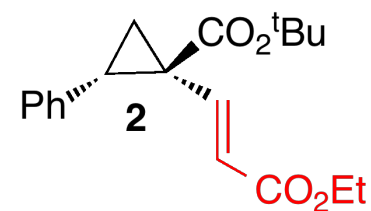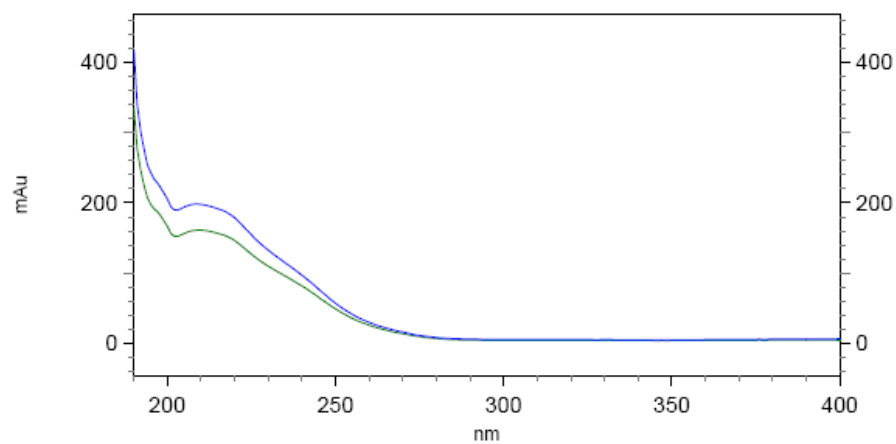

2: 209 nm, 4 nm

Results

| Pk #   | Name | Retention Time | Area Percent |
|--------|------|----------------|--------------|
| 1      |      | 16.864         | 50.121       |
| 2      |      | 22.232         | 49.879       |
| Totals |      |                | 100.000      |

xx-viii-114 whelk 1%@1.0 ml again

C:\EZStart\Projects\Default\Method\Shifa-P-Cyclopropane 5%Whelk.met

C:\EZStart\Projects\Default\Data\xx-viii-114 whelk 1%@1.0 ml again

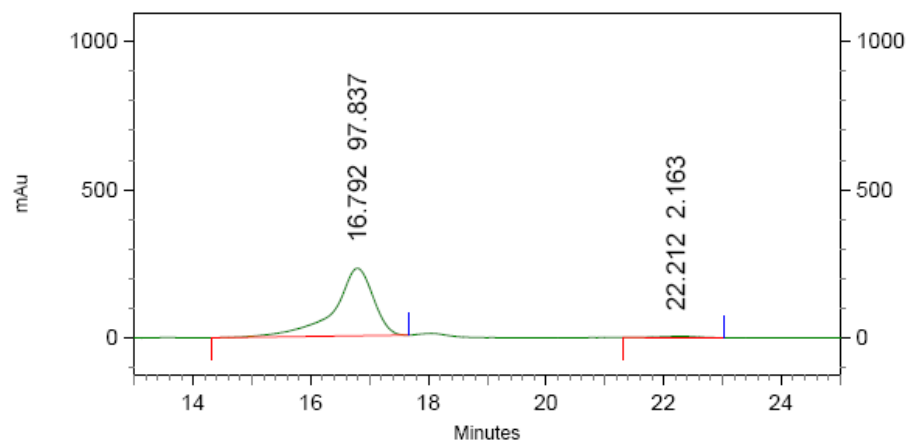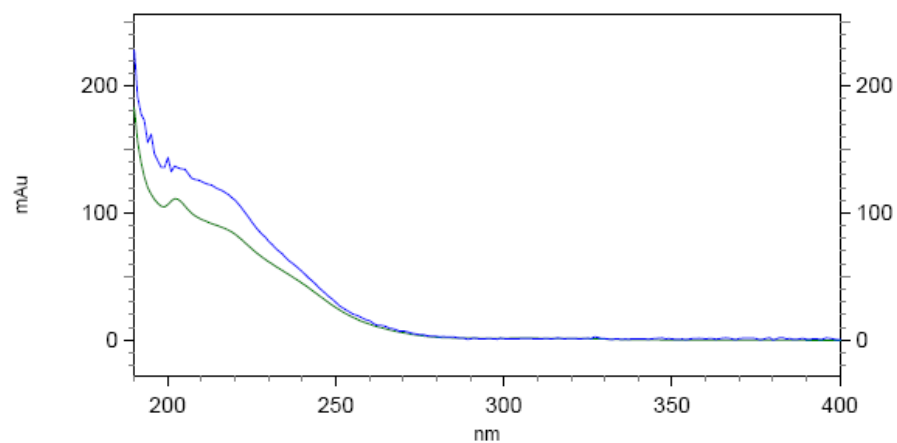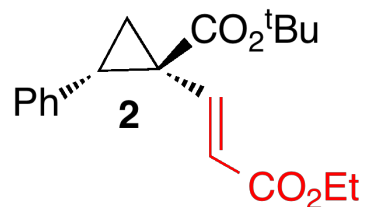

2: 209 nm, 4 nm

Results

| Pk # | Name | Retention Time | Area Percent |
|------|------|----------------|--------------|
| 1    |      | 16.792         | 97.837       |
| 2    |      | 22.212         | 2.163        |

|        |  |  |         |
|--------|--|--|---------|
| Totals |  |  | 100.000 |
|--------|--|--|---------|

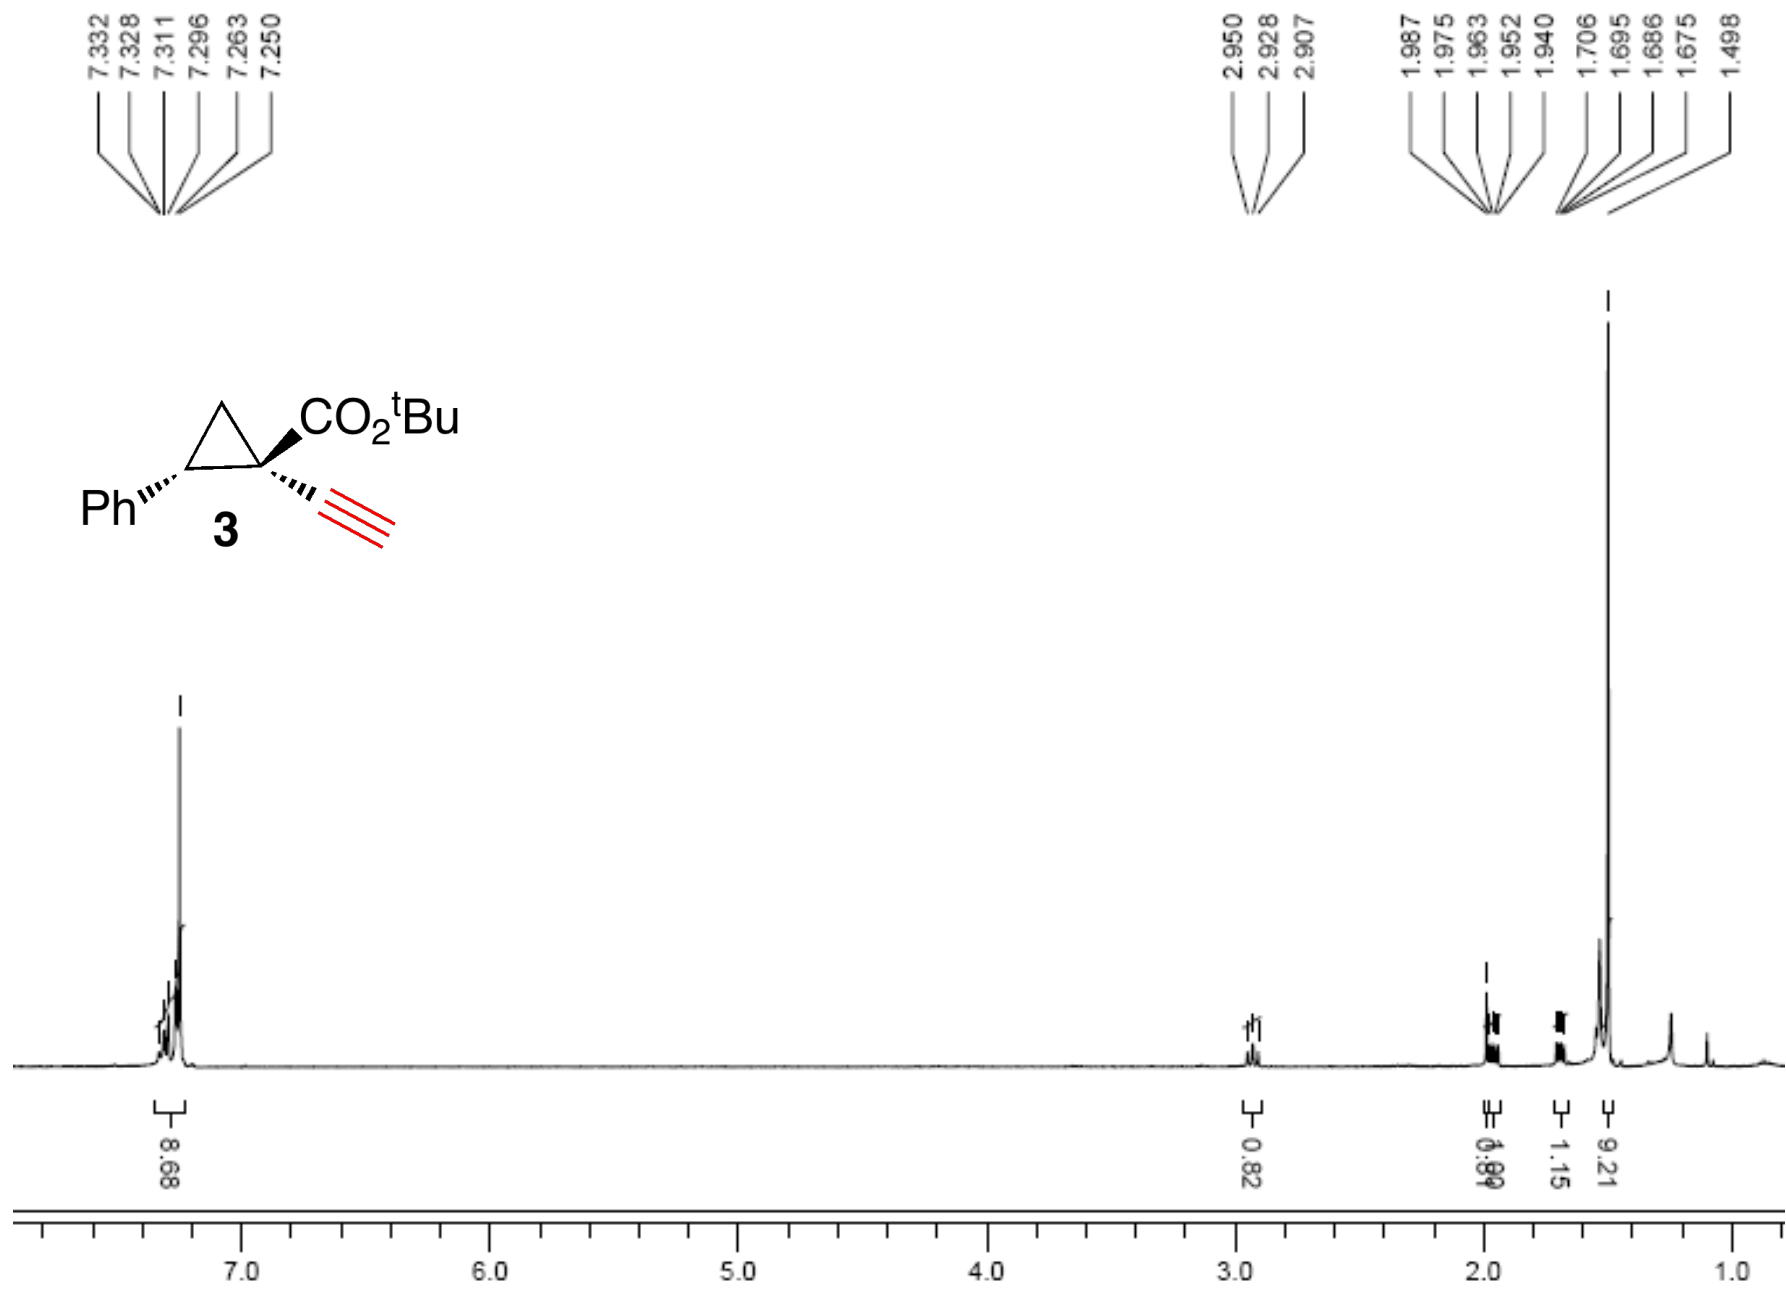

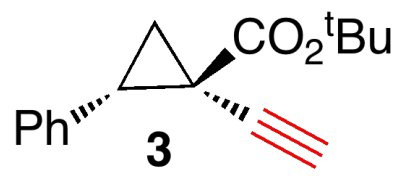

169.909

135.477  
128.774  
127.916  
127.152

82.025  
80.102  
71.322

34.790  
27.940  
25.505  
23.633

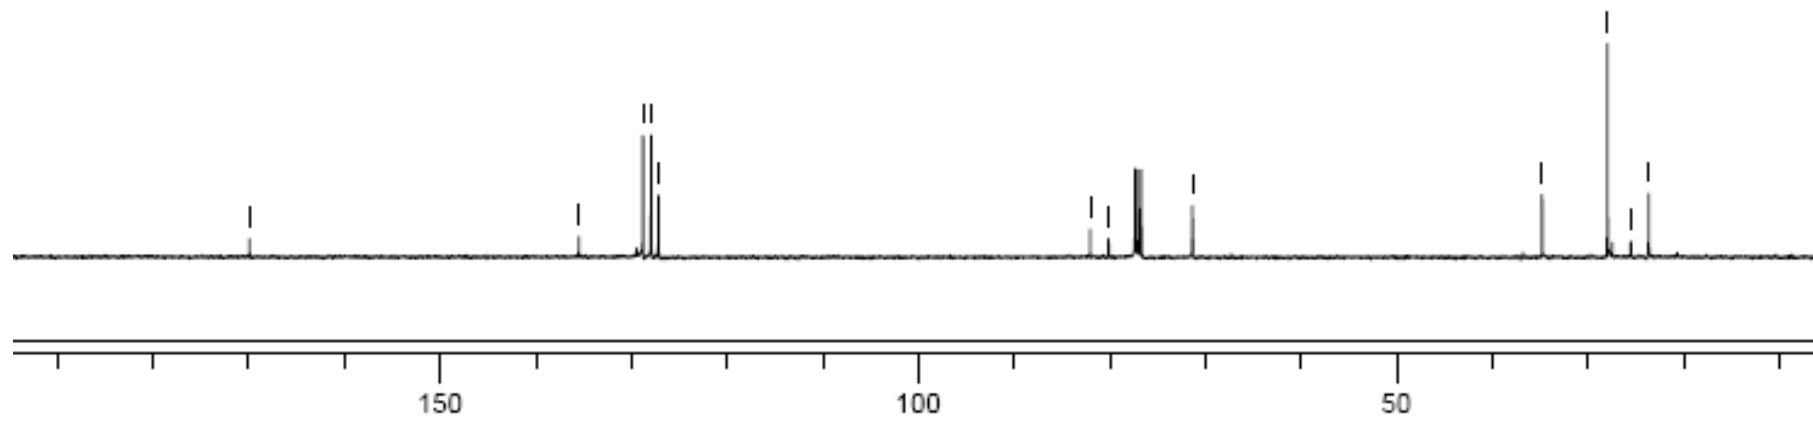



xx-viii-112 ODH 0%@1.0 ml  
 C:\EZStart\Projects\Default\Method\Shifa-P-Cyclopropane 5%Whelk.met  
 C:\EZStart\Projects\Default\Data\xx-viii-112pure ODH 0%@1.0 ml again

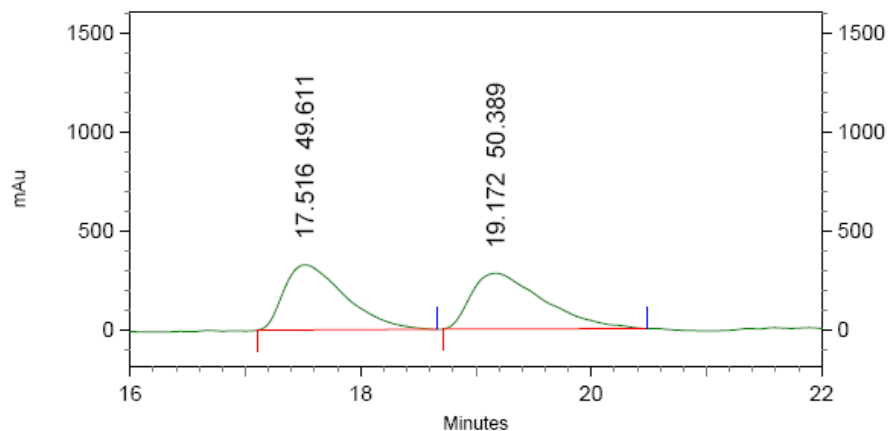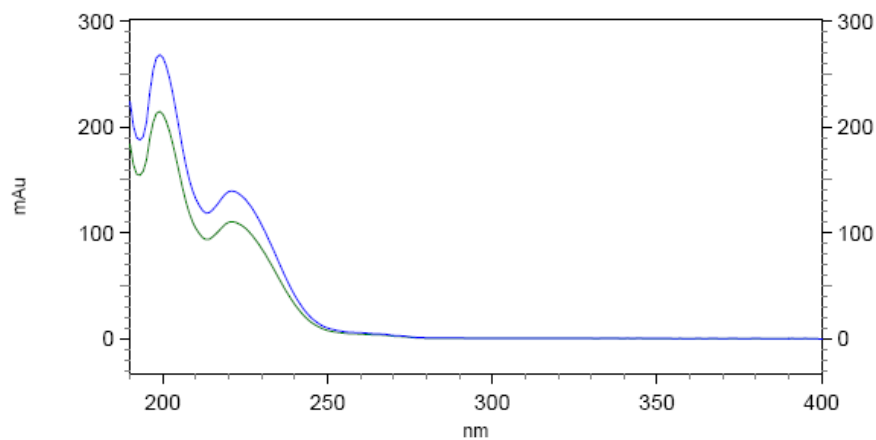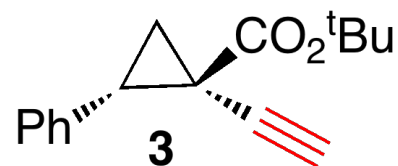

6: 207 nm, 4 nm

Results

| Pk #   | Name | Retention Time | Area Percent |
|--------|------|----------------|--------------|
| 1      |      | 17.516         | 49.611       |
| 2      |      | 19.172         | 50.389       |
| Totals |      |                | 100.000      |

xx-viii-116pure ODH 0%@1.0 ml again  
 C:\EZStart\Projects\Default\Method\Shifa-P-Cyclopropane 5%Whelk.met  
 C:\EZStart\Projects\Default\Data\xx-viii-116pure ODH 0%@1.0 ml again

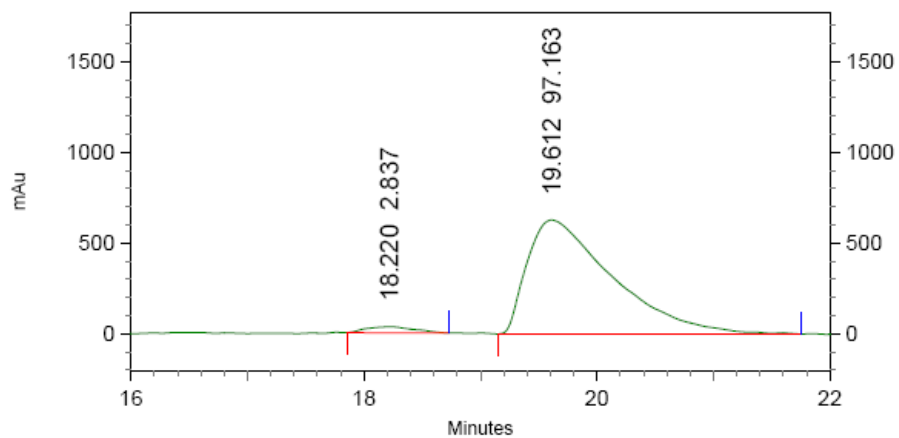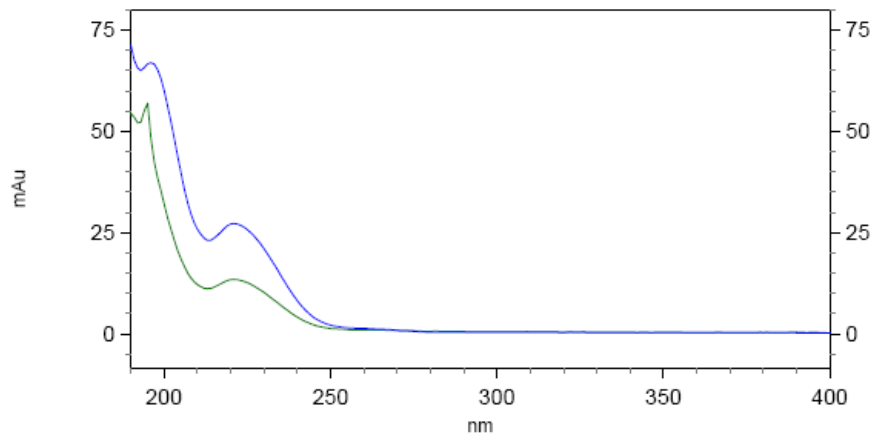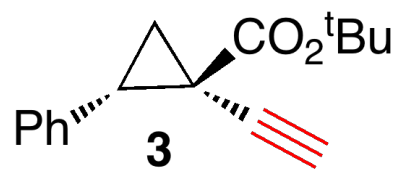

6: 207 nm, 4 nm  
 Results

| Pk #   | Name | Retention Time | Area Percent |
|--------|------|----------------|--------------|
| 1      |      | 18.220         | 2.837        |
| 2      |      | 19.612         | 97.163       |
| Totals |      |                | 100.000      |

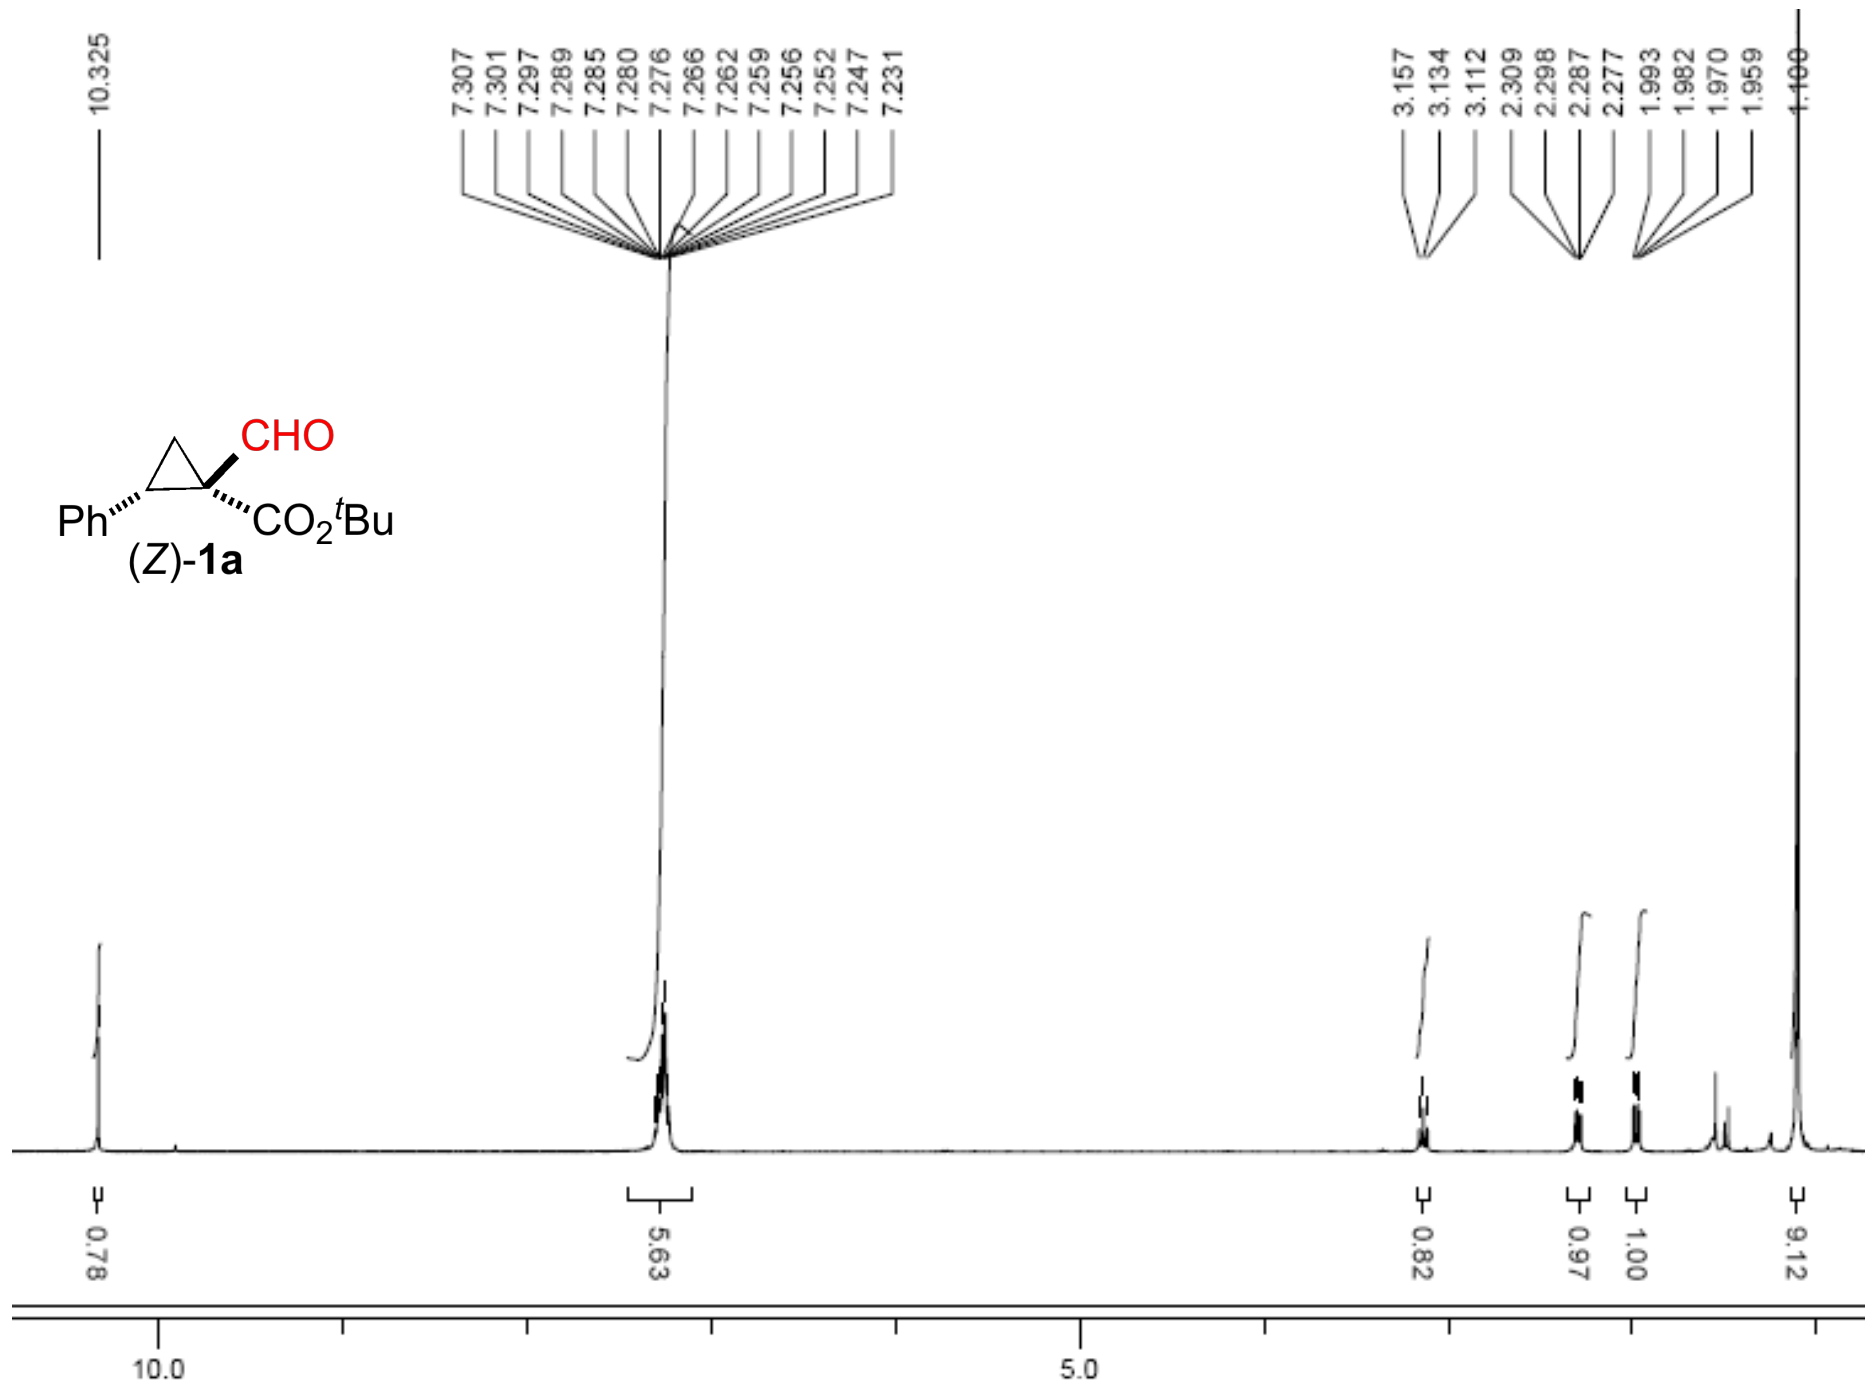

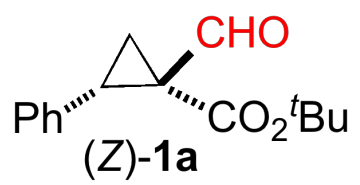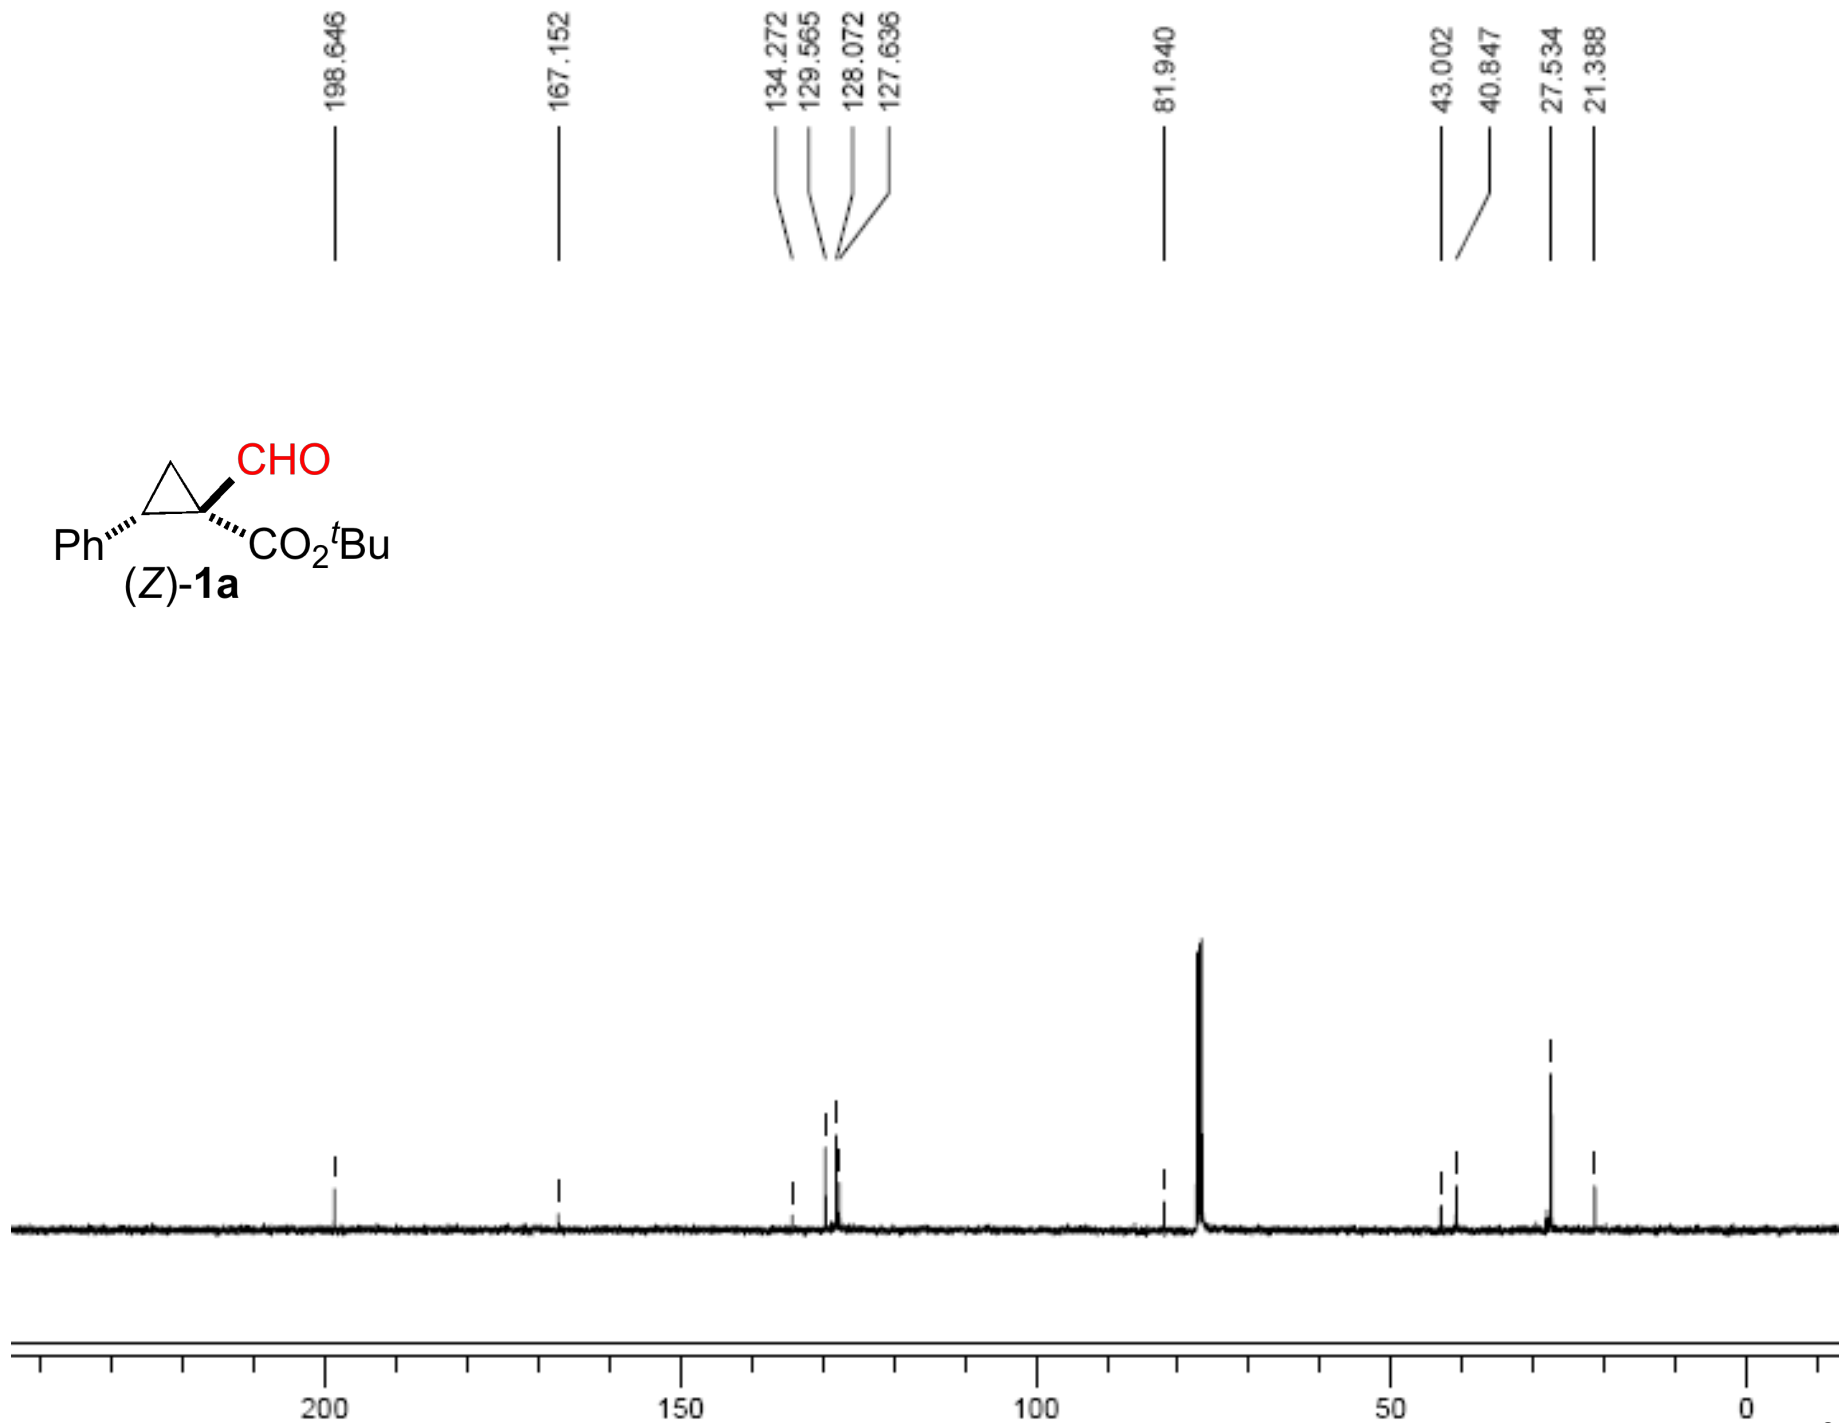

Sample Name : xx-viii-111 36 h DB 5  
Sample ID : xx-viii-111 36 h DB 5

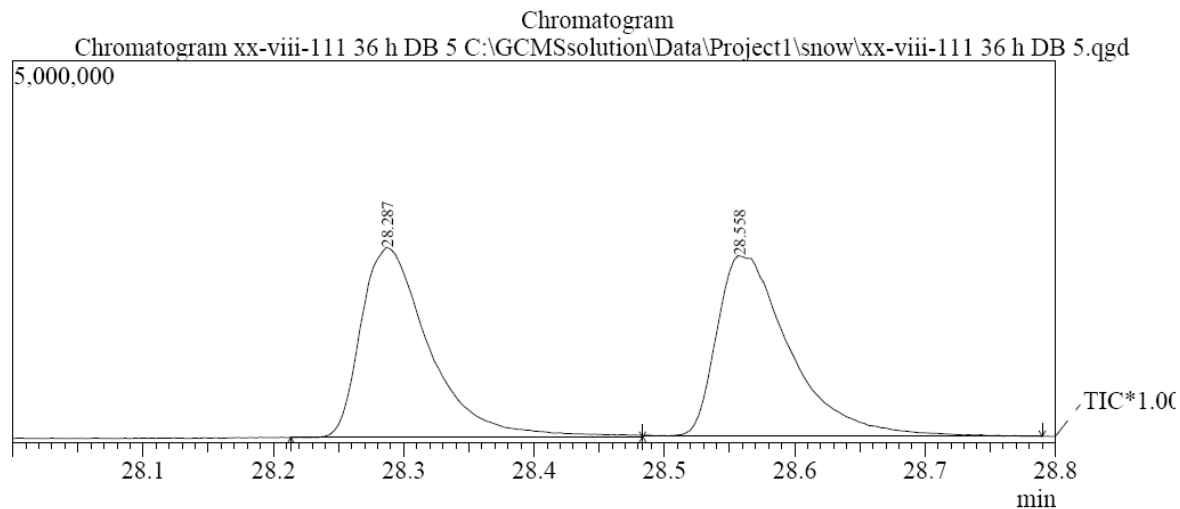

Peak Report TIC

| Peak# | R.Time | Area%  | Name | Base m/z |
|-------|--------|--------|------|----------|
| 1     | 28.287 | 49.60  |      | 57.10    |
| 2     | 28.558 | 50.40  |      | 57.10    |
|       |        | 100.00 |      |          |

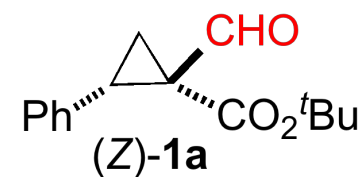

Spectrum

Peak#:1 R.Time:28.3(Scan#:6987)  
MassPeaks:199

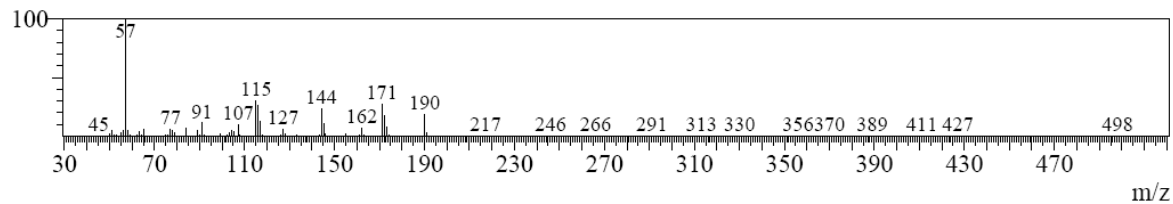

Peak#:2 R.Time:28.6(Scan#:7068)  
MassPeaks:218

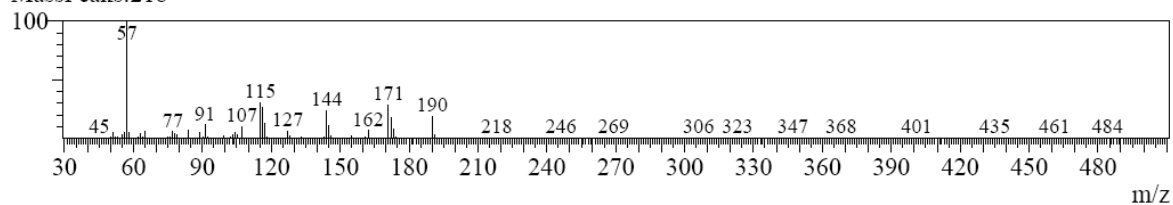

### Sample Information

Sample Name : xx-viii-115 DB 5  
 Sample ID : xx-viii-115 DB 5

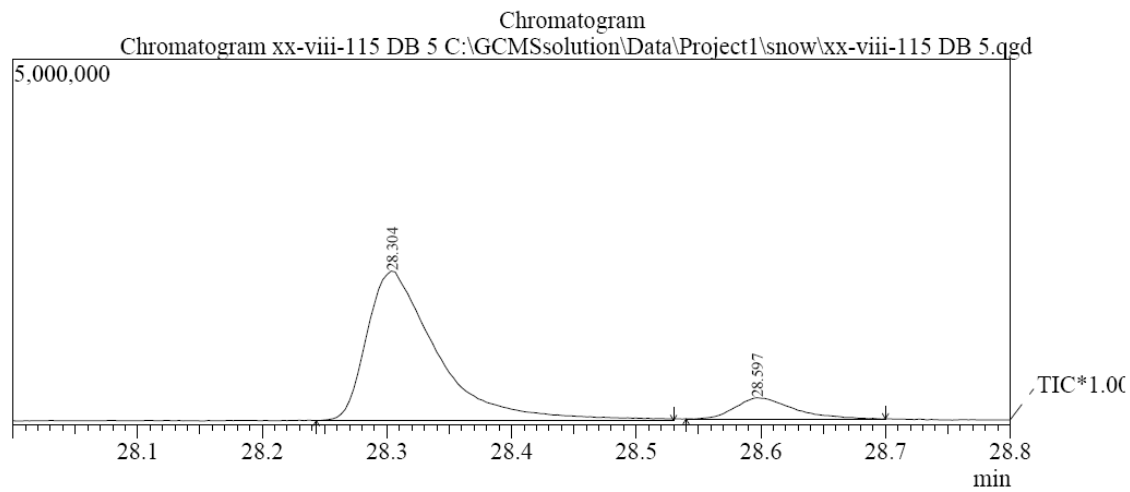

Peak Report TIC

| Peak# | R.Time | Area%  | Name | Base m/z |
|-------|--------|--------|------|----------|
| 1     | 28.304 | 89.61  |      | 57.10    |
| 2     | 28.597 | 10.39  |      | 57.10    |
|       |        | 100.00 |      |          |

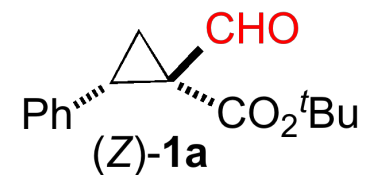

### Spectrum

Peak#:1 R.Time:28.3(Scan#:6992)  
 MassPeaks:206

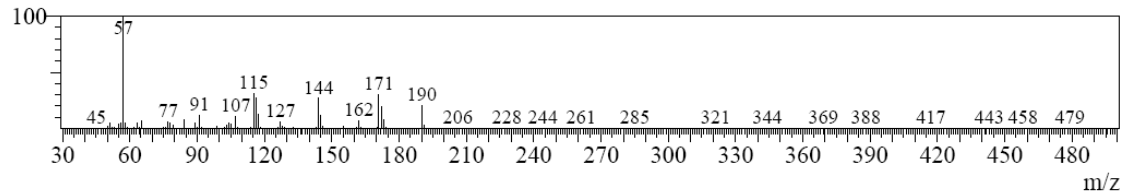

Peak#:2 R.Time:28.6(Scan#:7080)  
 MassPeaks:195

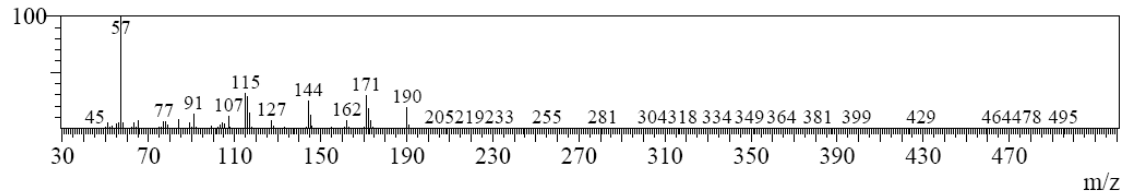

7.567  
7.564  
7.547  
7.544  
7.395  
7.390  
7.375  
7.371  
7.344  
7.341  
7.325  
7.323  
7.316  
7.311  
7.306  
7.182  
7.178  
7.163  
7.159  
7.144  
7.140  
5.998  
5.978  
5.970  
5.950

3.462  
3.457  
3.434  
3.429  
3.424  
3.419  
3.396  
3.391  
2.642  
2.637  
2.622  
2.617  
2.604  
2.599  
2.584  
2.579

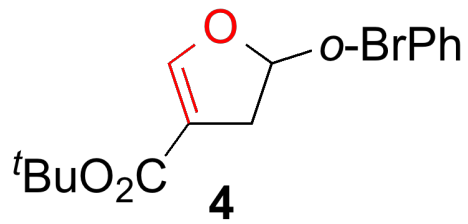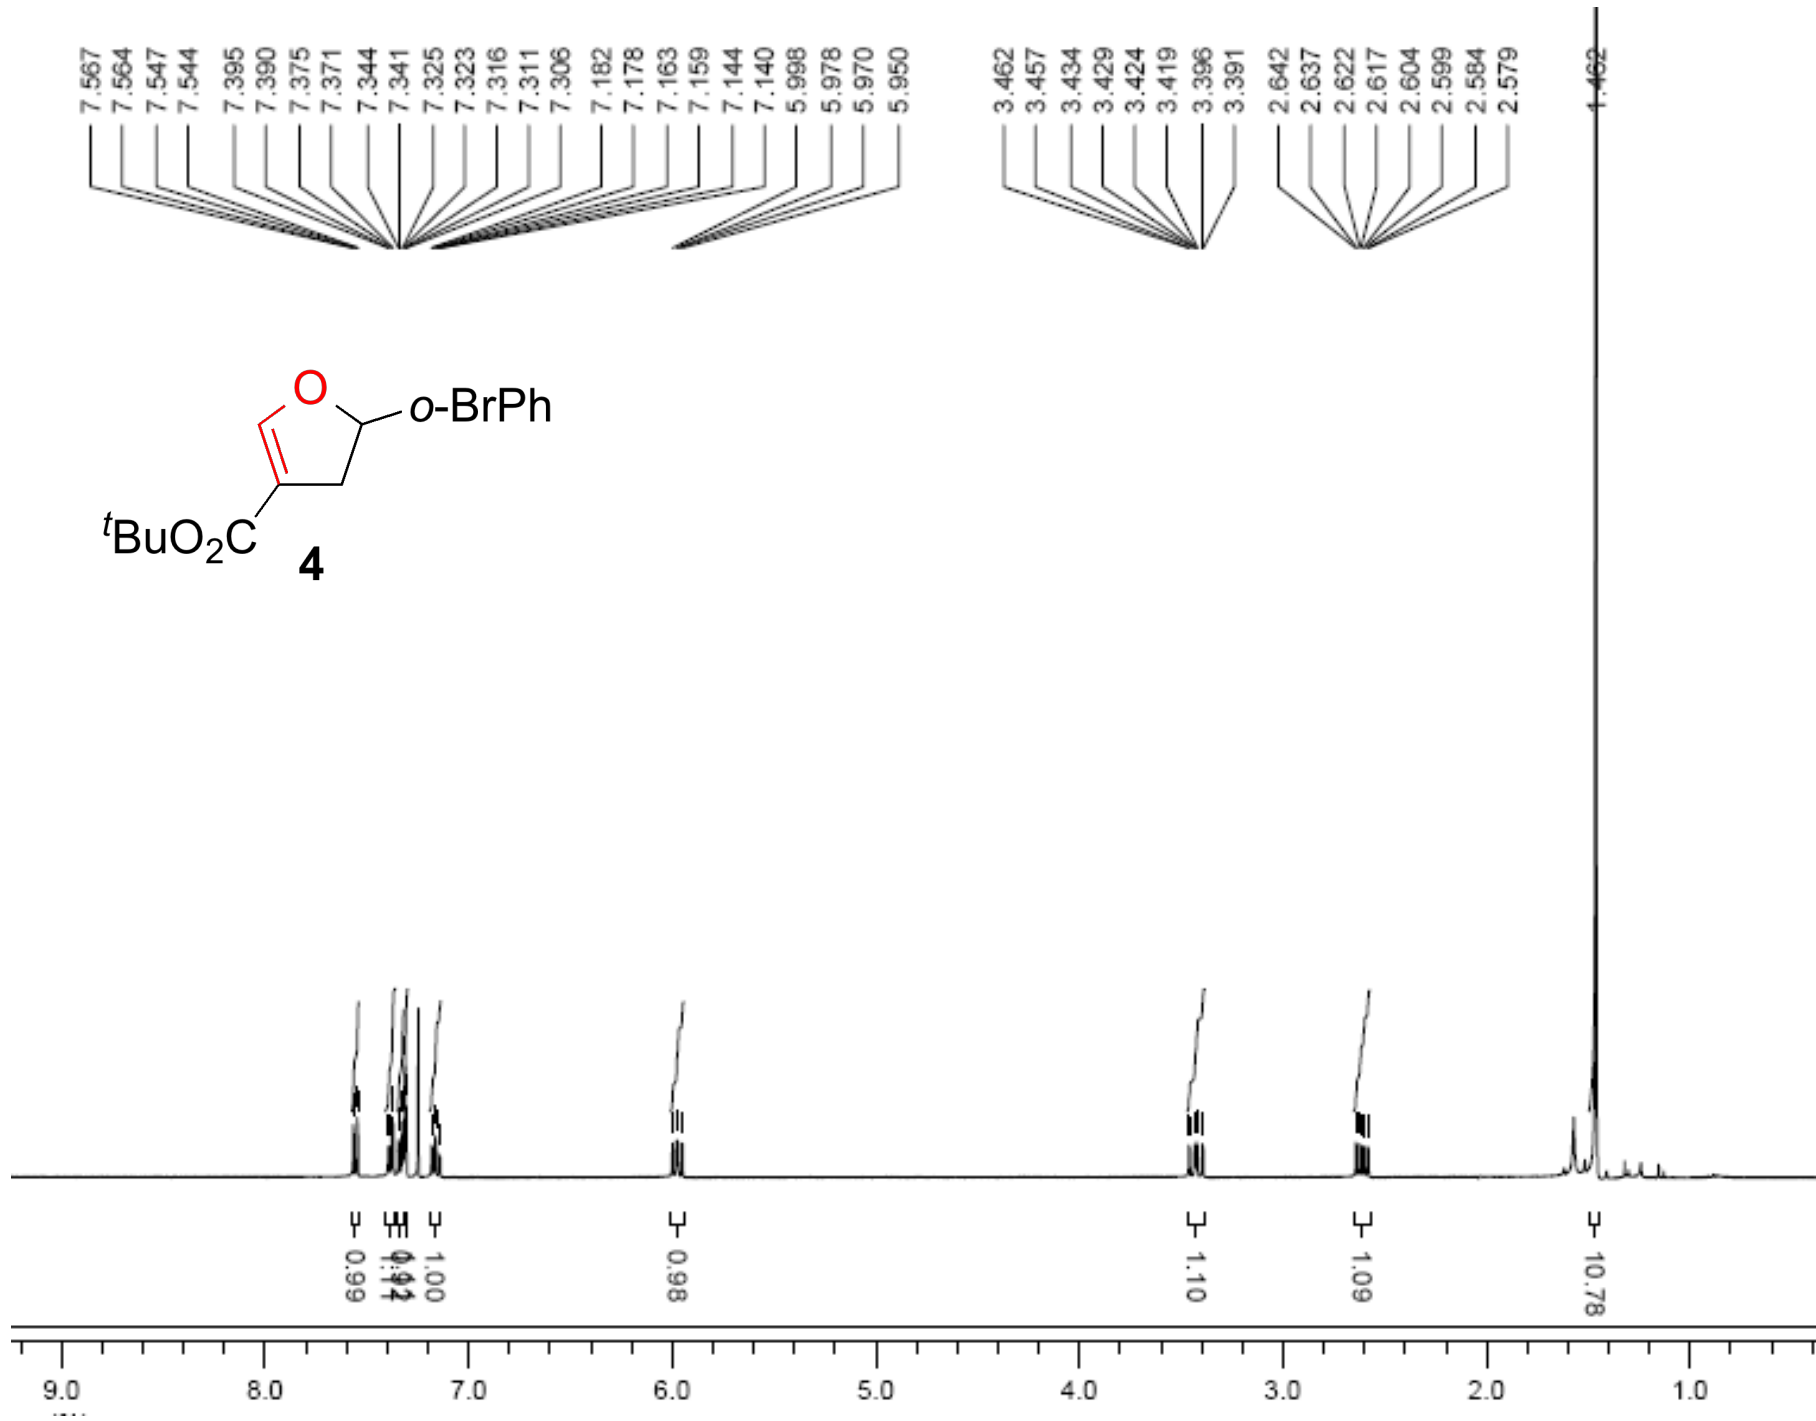

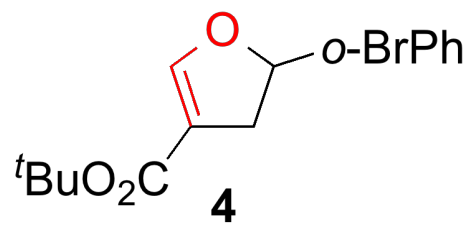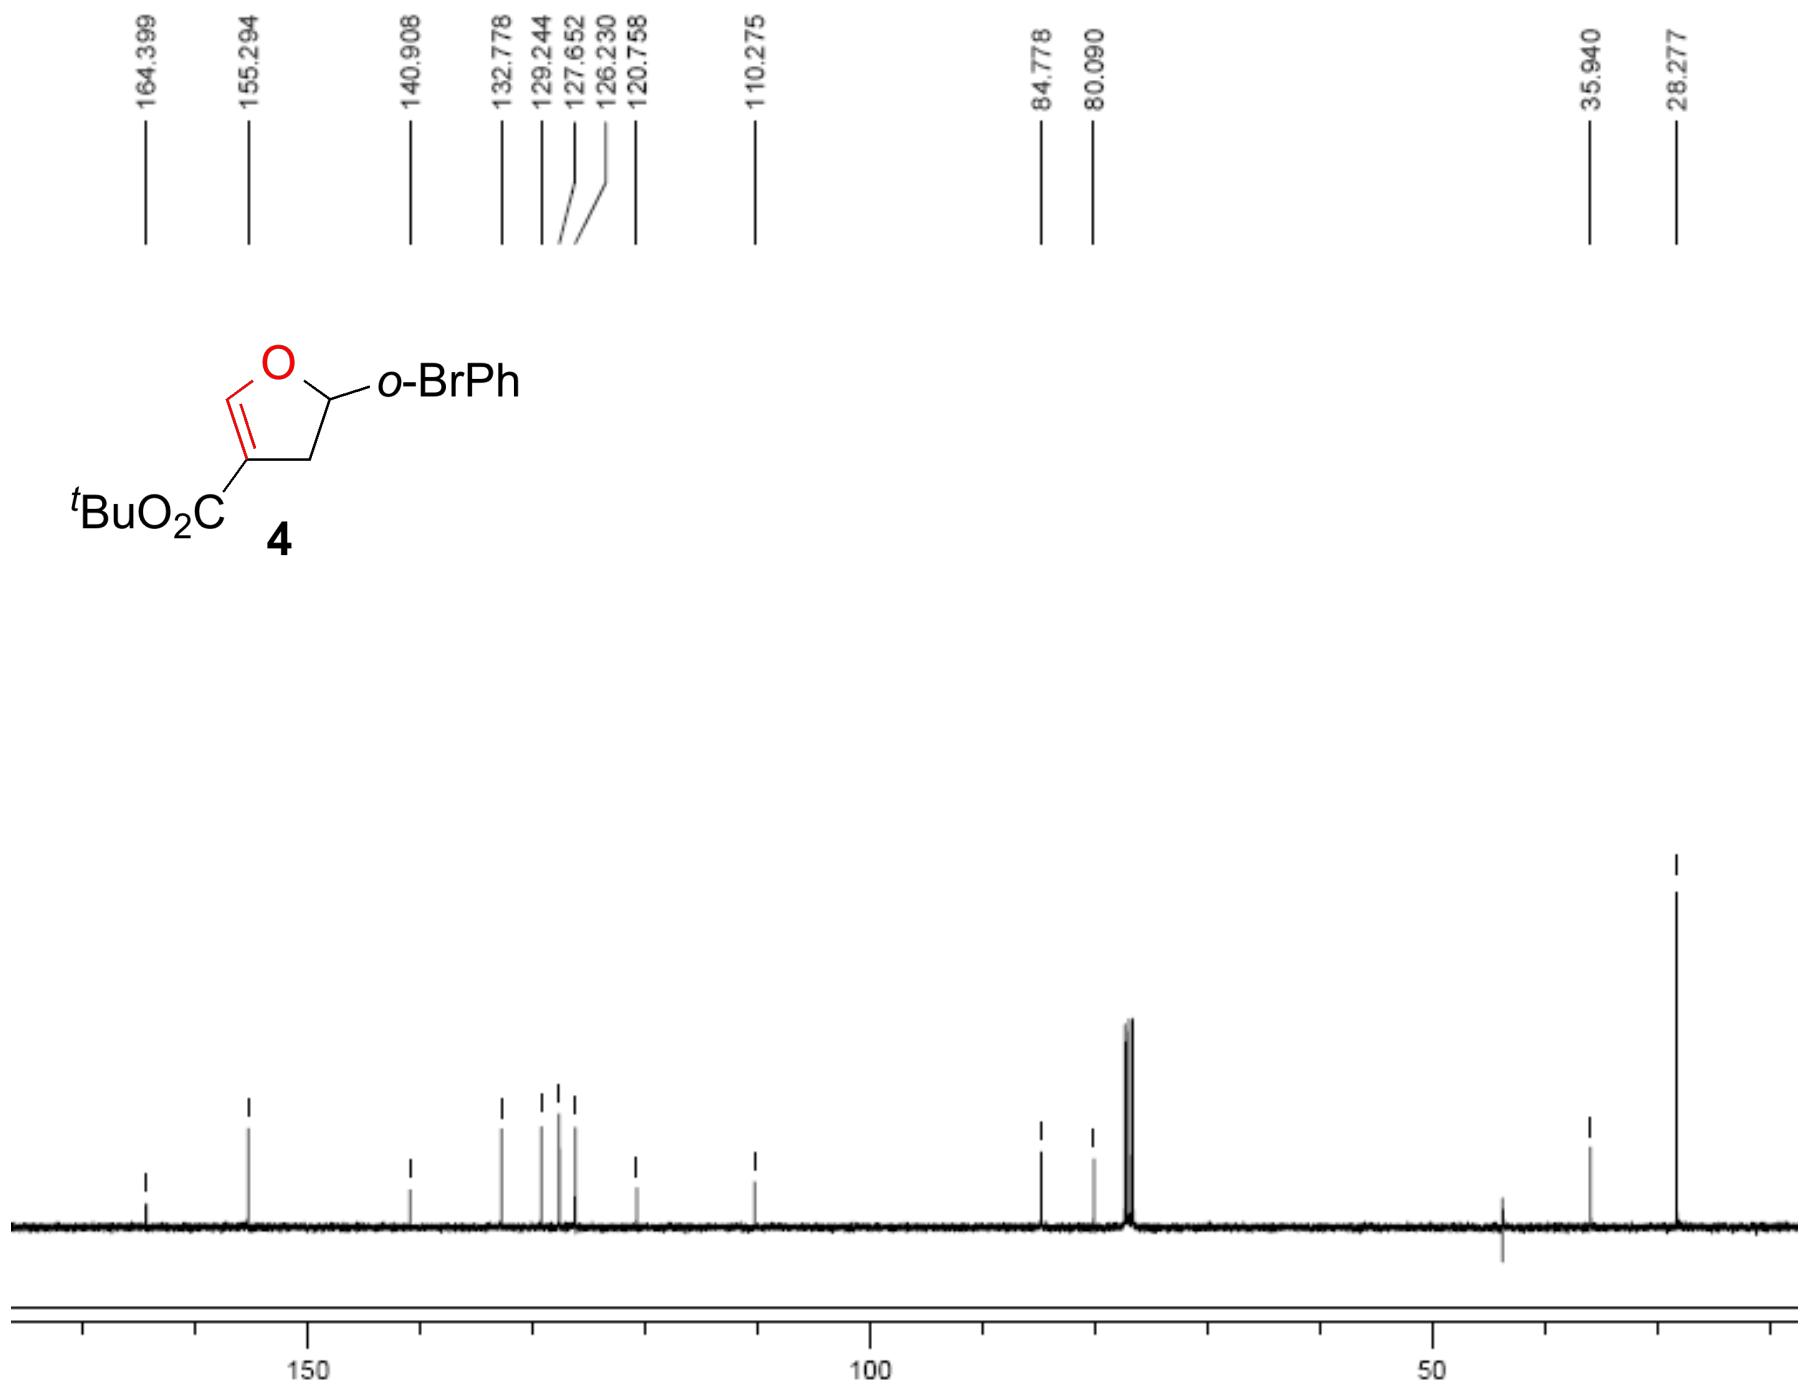



xx-viii-31-1 Whelk 1%@0.8 ml

C:\EZStart\Projects\Default\Method\snowtemp 2 .met

C:\EZStart\Projects\Default\Data\xx-viii-31-1 Whelk 1%@0.8 ml

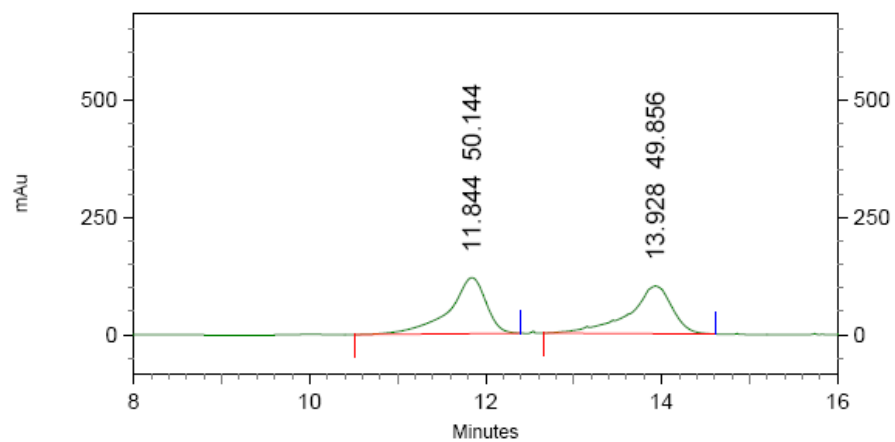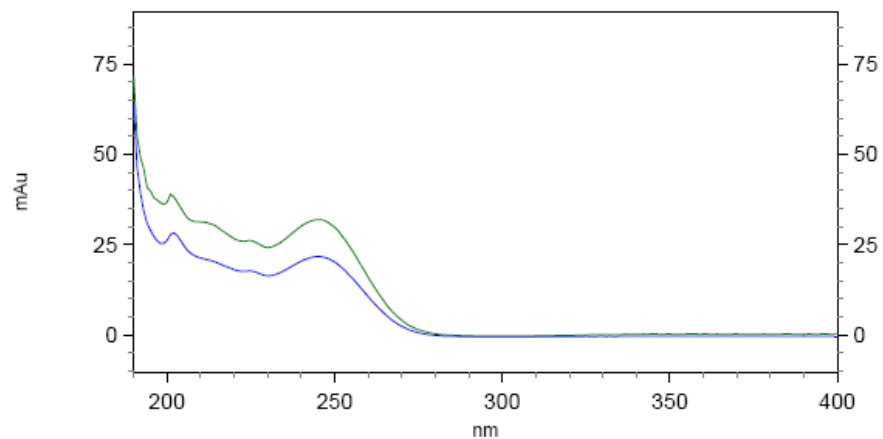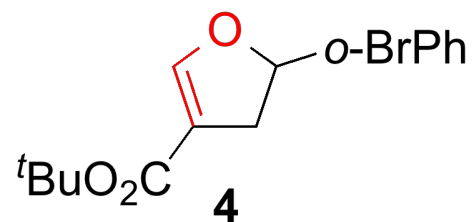

1: 247 nm, 4 nm

Results

| Pk #   | Name | Retention Time | Area Percent |
|--------|------|----------------|--------------|
| 1      |      | 11.844         | 50.144       |
| 2      |      | 13.928         | 49.856       |
| Totals |      |                | 100.000      |

xx-viii-51-3 whelk 1%0.8 ml  
 C:\EZStart\Projects\Default\Method\JTL-3%-ODH1ml.met  
 E:\xx-viii-51-3 whelk 1%0.8 ml

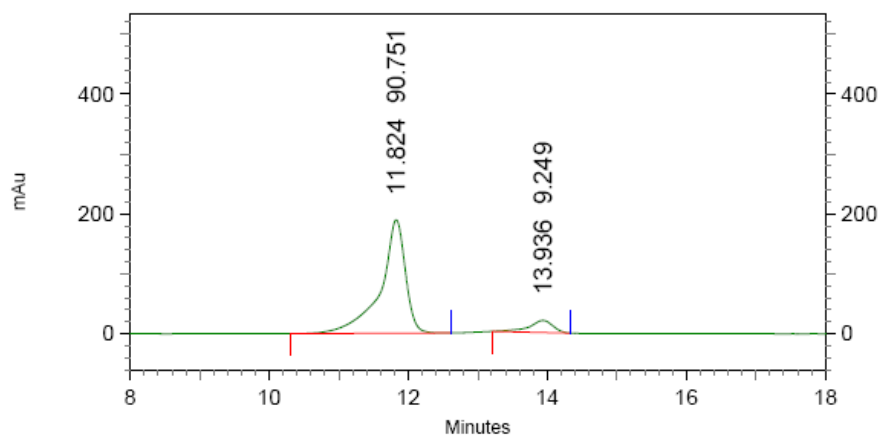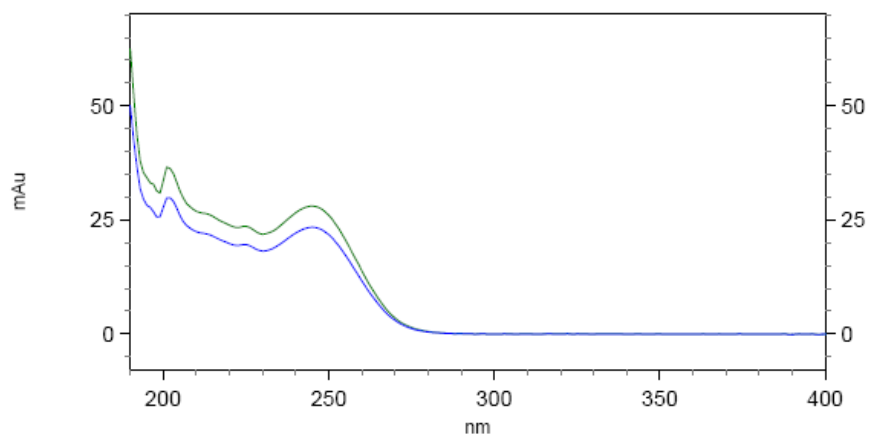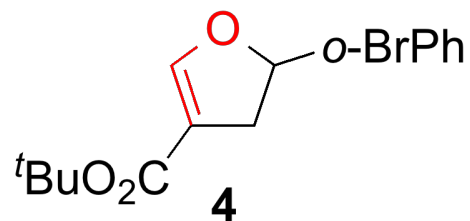

5: 228 nm, 4 nm

Results

| Name | Retention Time | Area Percent | Pk # |
|------|----------------|--------------|------|
|      | 11.824         | 90.751       | 1    |
|      | 13.936         | 9.249        | 2    |

|        |  |         |  |
|--------|--|---------|--|
| Totals |  | 100.000 |  |
|--------|--|---------|--|
